# Supplementary material for: Peripheral Blood Transcriptomic Signatures of Fasting Glucose and Insulin Concentrations
Source: Oxford University Press journal article supplement (doi:10.2337/db16-0470), 2016-09-13
Supplement: db160470supplementarydata3.xlsx [file db160470supplementarydata3.xlsx]

## Sheet: DB160470SupplementaryData3
Gene	probeID_FHS	probeID_ILMN	probeID2_ILMN	rsq_FHS	rsq_ILMN	beta_FHS	beta_ILMN	se_FHS	se_ILMN	tstat_FHS	tstat_ILMN	pval_FHS	pval_ILMN	FDR_FHS	FDR_ILMN
A1CF	3289445	ILMN_1779670	5340672	8.43e-06	0.000515817	-0.134131	0.0231857	0.0866685	0.0359589	-1.54763	0.644782	0.121773	0.519279	0.257388	0.816403
A2M	3443348	ILMN_1745607	2370438	0.000536737	0.000255728	0.0441919	0.0194193	0.0268892	0.0427803	1.64348	0.453931	0.100346	0.650019	0.222191	0.877532
A4GNT	2697308	ILMN_1680754	2260458	-0.000158623	0.00185848	0.0210586	0.0305428	0.0499049	0.0249362	0.421974	1.22484	0.673062	0.221047	0.813728	0.576241
AAAS	3456130	ILMN_1755321	60689	0.000612741	4.37e-06	-0.107057	-0.0016693	0.0655857	0.0281289	-1.63232	-0.0593448	0.102675	0.952694	0.22635	0.985223
AACS	3436571	ILMN_1698554	1580504	-0.00010348	0.000226102	-0.0350002	-0.0120905	0.0801096	0.0283269	-0.436904	-0.426821	0.6622	0.669641	0.806826	0.886527
AADAC	2648074	ILMN_1760414	6200619	-0.000182219	0.00133351	-0.0248343	-0.0303888	0.0639912	0.0292985	-0.388089	-1.03721	0.697966	0.299994	0.829601	0.663411
AADACL2	2648041	ILMN_1752884	1780408	-4.51e-05	0.00188306	-0.0571301	0.0347666	0.0575728	0.0281984	-0.992311	1.23293	0.321093	0.218015	0.5083	0.572593
AADAT	2793441	ILMN_1809959	1110326	-0.000193783	7.71e-05	-0.0287068	0.00936645	0.0968526	0.037594	-0.296397	0.249147	0.766939	0.803319	0.873003	0.940022
AAK1	2558150	ILMN_1880387	4900291	0.0073963	0.000714908	0.333302	0.0225189	0.0546512	0.0296625	6.09872	0.759171	1.15e-09	0.448005	1.82e-08	0.777465
AAMDC	3341440	ILMN_1779163	3310228	0.000562827	0.00708792	-0.0872246	-0.0504663	0.0432278	0.0210346	-2.01779	-2.3992	0.0436662	0.0166903	0.11685	0.135342
AAMP	2599345	ILMN_1653165	4610048	0.00199591	0.000307191	-0.277986	0.0114058	0.0897004	0.0229251	-3.09905	0.497527	0.0019521	0.618973	0.00866403	0.865337
AANAT	3735505	ILMN_1729835	1070703	-0.00010017	0.00143938	0.0494776	-0.0432371	0.0462897	0.0401212	1.06887	-1.07766	0.28518	0.281555	0.471259	0.647098
AARS	3697015	ILMN_1662364	290603	0.000481313	0.00400587	0.100342	-0.034385	0.0683537	0.0190979	1.46799	-1.80046	0.14217	0.0722162	0.289668	0.328903
AARS2	2955118	ILMN_1674698	4560681	-0.000178621	0.00690886	-0.0293879	-0.0515728	0.106849	0.0217749	-0.275042	-2.36846	0.783295	0.018132	0.884022	0.142711
AASDH	2770193	ILMN_1784269	4150561	-0.000141333	0.000247529	0.0105866	0.0100045	0.0310483	0.0224019	0.34097	0.446592	0.73314	0.655307	0.85142	0.879827
AASDHPPT	3347234	ILMN_1698189	6060767	-0.00016409	0.000792679	-0.0197864	-0.0175031	0.0648605	0.0218943	-0.30506	-0.799434	0.760333	0.424309	0.869343	0.763333
AASS	3070183	ILMN_2157219	1500465	-0.000182189	0.00017697	0.0486731	0.0130503	0.0554699	0.0345614	0.877468	0.377599	0.380274	0.705842	0.571431	0.900283
AATF	3719362	ILMN_1703743	6020372	0.00216956	0.00866598	-0.243657	-0.0446289	0.0728333	0.0168075	-3.3454	-2.65529	0.000827634	0.00810343	0.00412448	0.0838166
AATK-AS1	3737783	ILMN_1671997	2120274	-0.000137637	0.000166974	-0.0284983	0.00938433	0.0931199	0.0255859	-0.306039	0.366778	0.759588	0.713895	0.868986	0.901534
ABAT	3647421	ILMN_1670117	1110025	0.000118581	0.00106079	-0.0305767	-0.0261676	0.0282479	0.0282909	-1.08244	-0.924946	0.279108	0.355312	0.464474	0.713822
ABCA1	3218528	ILMN_1766054	4060358	0.030463	0.00978882	-0.428057	-0.0243701	0.0335665	0.00862993	-12.7525	-2.82391	1.11e-36	0.00487846	3.17e-34	0.0594994
ABCA10	3768880	ILMN_2070570	7550128	-8.34e-05	0.00118675	-0.0513903	-0.0296819	0.0732924	0.0303376	-0.701168	-0.978388	0.483231	0.328219	0.66396	0.689764
ABCA11P	2756309	ILMN_2232084	2320403	0.000715192	0.00264682	-0.0730337	-0.0411344	0.032842	0.0281285	-2.22379	-1.46237	0.0262067	0.144086	0.077454	0.467829
ABCA12	2598145	ILMN_2361400	4900711	-0.000196236	4.25e-05	0.0815765	0.00771288	0.131781	0.0416725	0.619029	0.185083	0.535925	0.853217	0.710753	0.954631
ABCA3	3676763	ILMN_1758523	430402	6.17e-05	4.69e-05	0.178464	0.00456092	0.131039	0.0234634	1.36192	0.194385	0.173285	0.845931	0.334467	0.953164
ABCA4	2423669	ILMN_1794965	6650504	-0.000117392	0.000223891	0.141194	-0.0128624	0.132549	0.0302839	1.06522	-0.424728	0.286829	0.671165	0.473205	0.887155
ABCA6	3768791	ILMN_1795507	6940519	0.00467718	7.63e-06	-0.186034	0.00221492	0.0379128	0.0282559	-4.9069	0.078388	9.54e-07	0.937542	9.13e-06	0.981761
ABCA7	3815416	ILMN_1743205	2570100	0.013932	0.00988442	-0.884794	-0.0371422	0.10467	0.0130883	-8.45319	-2.83782	3.67e-17	0.00467315	1.62e-15	0.0575193
ABCA8	3768627	ILMN_1796801	2710392	0.000107067	0.00220773	-0.165164	-0.0366122	0.119374	0.02742	-1.38359	-1.33524	0.166545	0.18223	0.324993	0.525155
ABCA9	3768703	ILMN_1668446	5220386	0.00219415	0.00244543	-0.210853	0.0502354	0.0600623	0.0357427	-3.51057	1.40548	0.00045106	0.160322	0.00241783	0.492198
ABCB1	3060182	ILMN_1812070	1230048	0.00474877	0.00214423	0.264393	-0.0289107	0.0558485	0.0219711	4.73411	-1.31585	2.26e-06	0.188653	2e-05	0.533786
ABCB10	2459924	ILMN_1665730	4810048	0.00685786	0.00557442	0.235254	0.0349883	0.0415942	0.0164587	5.65592	2.12583	1.64e-08	0.0338657	2.15e-07	0.212987
ABCB11	2585972	ILMN_2232066	7330332	-0.000214302	6.36e-05	-0.0405167	0.0055912	0.10327	0.0247095	-0.392339	0.226277	0.694825	0.821052	0.827745	0.946704
ABCB7	4012949	ILMN_1687840	5700286	3.44e-05	7.86e-05	-0.0500741	0.00573319	0.0619749	0.0227772	-0.807973	0.251707	0.419144	0.801341	0.606495	0.93895
ABCB8	3031754	ILMN_2102422	3990592	-6.07e-05	0.000298568	0.0489755	0.0146022	0.104768	0.0297704	0.467466	0.490492	0.640186	0.623939	0.790734	0.867851
ABCC1	3649890	ILMN_1802404	1500187	0.000282423	0.000350734	0.111153	-0.0177677	0.085908	0.033421	1.29386	-0.531634	0.195773	0.595148	0.364898	0.8562
ABCC10	2907943	ILMN_1776119	650646	0.000157549	0.000721391	-0.144883	0.0211146	0.11213	0.0276873	-1.2921	0.762608	0.196381	0.445953	0.365805	0.776663
ABCC12	3690388	ILMN_1762093	6290348	0.000206754	0.00016536	-0.163731	0.0154303	0.120305	0.0422747	-1.36097	0.365	0.173584	0.715221	0.334776	0.902104
ABCC13	3914786	ILMN_1774344	4780553	0.00706676	0.000629219	0.237933	0.0220982	0.0403697	0.0310287	5.89386	0.712187	4.02e-09	0.476585	5.9e-08	0.795229
ABCC2	3260447	ILMN_1676278	2230746	-0.000212898	0.00766333	0.0146731	0.088879	0.0907122	0.0356155	0.161754	2.49552	0.871506	0.0128056	0.933308	0.114048
ABCC6	3682182	ILMN_1725675	3060279	0.000501923	0.00295535	-0.206525	-0.0483081	0.114289	0.0312567	-1.80705	-1.54553	0.0708145	0.122668	0.170936	0.430916
ABCC8	3364878	ILMN_1767129	4850086	-0.00019535	0.000656541	0.0347591	0.0317342	0.135587	0.0436211	0.25636	0.727496	0.797683	0.467164	0.892901	0.789532
ABCD1	3995848	ILMN_1772189	4890609	0.00159434	0.0014035	-0.217064	-0.0264264	0.0789537	0.024834	-2.74926	-1.06412	0.00599423	0.287638	0.0225823	0.651546
ABCD2	3450861	ILMN_1652959	2940709	-8.05e-06	0.00115979	-0.0397101	-0.0291217	0.04325	0.0301094	-0.918153	-0.967198	0.358583	0.333778	0.54939	0.694344
ABCD4	3571810	ILMN_2343917	3130209	-0.000254529	0.00258727	-0.0650563	-0.0513047	0.0958078	0.0354858	-0.679028	-1.44578	0.497151	0.148685	0.675766	0.475239
ABCE1	2746024	ILMN_1676846	5310152	8.32e-05	0.00997156	-0.0535694	0.0465068	0.0425612	0.0163156	-1.25864	2.85045	0.208218	0.00449364	0.381426	0.0559384
ABCF3	2655511	ILMN_1810085	4560689	0.00053219	0.00377081	-0.116921	-0.0455145	0.0716789	0.0260589	-1.63118	-1.7466	0.102915	0.0811432	0.226797	0.351718
ABCG5	2550755	ILMN_1716592	6290575	0.000143154	0.00138662	0.0921778	-0.0324754	0.0824818	0.030704	1.11755	-1.05769	0.263811	0.290558	0.4467	0.655285
ABCG8	2479560	ILMN_1680309	2690367	0.0003576	0.00371413	0.12616	-0.0488154	0.0790037	0.0281622	1.59689	-1.73337	0.110352	0.0834686	0.238945	0.35768
ABHD10	2635983	ILMN_1770031	1300328	0.000263701	0.00163489	-0.0704368	0.0220737	0.0560269	0.0192171	-1.2572	1.14865	0.208741	0.25109	0.382211	0.616848
ABHD11	3056264	ILMN_1737475	6110592	0.000288767	0.000251838	0.11437	-0.0152929	0.0772967	0.0339492	1.47962	-0.450464	0.139037	0.652515	0.284689	0.878766
ABHD12	3901851	ILMN_2245305	7610382	-6.05e-05	0.00249025	-0.0891568	-0.032737	0.0659305	0.0230814	-1.35228	-1.41833	0.176345	0.156537	0.338261	0.485401
ABHD12B	3535307	ILMN_1707925	2690040	0.000542423	0.000178686	0.0894589	0.00979277	0.0377794	0.0258095	2.36793	0.379425	0.0179256	0.704487	0.0567683	0.900124
ABHD15	3751524	ILMN_1769390	5340450	-0.000159151	0.00609246	-0.0343006	-0.0471363	0.064519	0.0212032	-0.531635	-2.22307	0.595002	0.026528	0.756945	0.182248
ABHD16B	3893732	ILMN_1805483	5550400	0.000193346	0.000411332	-0.0715267	-0.0164919	0.0573031	0.0286441	-1.24822	-0.575751	0.21201	0.564967	0.386663	0.842175
ABHD17A	3845581	ILMN_2140623	4150463	-0.00011424	0.00170417	-0.0345801	0.0432415	0.0551997	0.0368709	-0.626454	1.17278	0.531045	0.24128	0.706458	0.604958
ABHD17B	3209497	ILMN_1668336	5960528	-0.000186046	0.000541003	-0.0205986	-0.0175967	0.0652462	0.0266477	-0.315705	-0.660345	0.752239	0.509249	0.864193	0.811055
ABHD2	3607447	ILMN_2403446	2970201	0.0196289	9.54e-05	-0.587166	-0.00632633	0.0590393	0.0228172	-9.94535	-0.277262	4.31e-23	0.781661	3.96e-21	0.930306
ABHD3	3800834	ILMN_1801767	5050241	0.000572722	6.19e-06	-0.115618	-0.000895206	0.0560584	0.012673	-2.06245	-0.0706386	0.0392159	0.943706	0.107374	0.982942
ABHD4	3528759	ILMN_1700633	3120014	0.00807472	0.00212355	-0.448104	-0.0295428	0.0722809	0.0225608	-6.19948	-1.30947	6.12e-10	0.190801	1.02e-08	0.536007
ABHD5	2619761	ILMN_1655702	5860215	0.0151179	0.0153257	-0.352482	-0.0464958	0.042737	0.0131165	-8.24769	-3.54482	2.04e-16	0.000418908	8.14e-15	0.00934785
ABHD8	3854349	ILMN_1712707	4880288	0.0011017	0.00838148	0.222771	-0.054996	0.0897255	0.0210639	2.48281	-2.61091	0.0130673	0.0092226	0.0438702	0.0916933
ABI1	3282016	ILMN_1739081	3520706	0.00340661	1.28e-05	-0.376237	-0.00259737	0.0866439	0.0256021	-4.34234	-0.101452	1.44e-05	0.919221	0.000107445	0.977001
ABI2	2523689	ILMN_1724497	2000100	0.0119403	0.00020758	0.456222	-0.0085354	0.0611497	0.020871	7.46074	-0.408961	1.01e-13	0.682693	2.9e-12	0.891553
ABI3	3725602	ILMN_1755658	3840717	0.0011795	0.0040254	-0.192818	-0.0242254	0.0768147	0.0134223	-2.51017	-1.80487	0.0120984	0.0715236	0.0412289	0.32733
ABI3BP	2686458	ILMN_1673639	6980739	0.000289964	3.01e-05	-0.181942	0.0056952	0.111398	0.0365533	-1.63326	0.155805	0.102476	0.876231	0.225954	0.962491
ABL1	3191724	ILMN_2268241	4880170	0.000134797	0.00330439	0.0850563	-0.0523634	0.0715747	0.0320348	1.18836	-1.63458	0.234748	0.102585	0.412937	0.394078
ABLIM3	2834863	ILMN_1656940	2350747	0.000769059	0.00156376	0.174155	0.0332088	0.0736004	0.0295625	2.36622	1.12334	0.0180084	0.261676	0.0569858	0.628019
ABO	3228582	ILMN_1656979	1240575	0.000357672	1.84e-06	-0.104455	-0.00164878	0.0639284	0.0428667	-1.63394	-0.0384629	0.102333	0.96933	0.225845	0.989866
ABRA	3148387	ILMN_1766991	3610382	-0.000125626	0.000142537	0.0176125	-0.0145926	0.0355911	0.0430622	0.494858	-0.338872	0.620722	0.734807	0.774349	0.912169
ABRACL	2927967	ILMN_1720858	6020681	0.00254222	0.00768572	0.118643	0.0363213	0.0356195	0.0145332	3.33085	2.49919	0.000872036	0.0126747	0.00431166	0.113554
ABT1	2899519	ILMN_1658083	6480392	0.00114141	0.000572664	-0.135907	-0.0153622	0.0644925	0.0226112	-2.10733	-0.679405	0.0351379	0.497105	0.0980575	0.805244
ABTB1	2640916	ILMN_2367165	6620609	0.0241188	0.00021585	-0.551144	-0.0054196	0.0515449	0.0129957	-10.6925	-0.417029	2.11e-26	0.676784	2.6e-24	0.889232
ABTB2	3368940	ILMN_1753370	940148	0.000250993	1.52e-05	-0.142653	-0.0030917	0.099429	0.027903	-1.43473	-0.110801	0.151427	0.911805	0.303257	0.973012
ACAA1	2669533	ILMN_1738921	3520753	0.00251092	1.1e-05	-0.251306	-0.00163372	0.0747434	0.0173739	-3.36225	-0.0940326	0.000778841	0.92511	0.00391206	0.977662
ACAA2	3807569	ILMN_1660199	1450093	0.00330078	0.00264491	0.157044	0.027695	0.0398934	0.0189452	3.93659	1.46184	8.38e-05	0.144231	0.000534598	0.46808
ACACB	3430959	ILMN_1763852	2230678	-7.37e-05	0.00430079	0.0754166	-0.0328623	0.105036	0.0176122	0.718009	-1.86588	0.472785	0.0624747	0.654233	0.302338
ACADL	2597347	ILMN_1660890	130193	-0.000125418	0.000372697	-0.0180098	0.0154591	0.0721886	0.0282083	-0.249483	0.548033	0.802997	0.583843	0.896934	0.851127
ACADSB	3268588	ILMN_1740920	3610136	0.000538024	2.04e-08	0.0953062	-0.000125091	0.0470709	0.030859	2.02473	-0.00405362	0.0429472	0.996767	0.11541	0.998424
ACAN	3607332	ILMN_1693148	6770470	-0.000207693	0.00142367	-0.0435644	0.0439877	0.122725	0.0410427	-0.354976	1.07175	0.722622	0.284198	0.845316	0.649703
ACAP1	3708462	ILMN_1808395	7210682	-0.000193692	0.00127492	-0.0196911	-0.0150204	0.066409	0.0148111	-0.296512	-1.01414	0.766851	0.310867	0.872986	0.673731
ACAP2	2712040	ILMN_1766798	3060747	0.000272957	0.00492993	-0.111436	0.0334903	0.0819259	0.0167584	-1.3602	1.99842	0.173827	0.0460557	0.334936	0.254574
ACAP3	2391302	ILMN_1743847	4850215	-0.000244732	0.00344087	0.0451193	-0.0595449	0.119115	0.0356957	0.378789	-1.66812	0.704861	0.0957363	0.834503	0.380698
ACAT1	3347615	ILMN_1800008	2070605	0.0026891	0.00366483	0.241839	0.0285196	0.0588757	0.016564	4.10762	1.72178	4.06e-05	0.0855494	0.000275685	0.360823
ACAT2	2934131	ILMN_2133799	7210440	0.00759802	6.45e-07	0.320401	-0.000649325	0.0526392	0.028488	6.08674	-0.0227929	1.24e-09	0.981822	1.95e-08	0.994022
ACBD3	2458701	ILMN_1665945	5890112	9.19e-05	0.00260493	-0.105805	0.0301011	0.0749295	0.0207491	-1.41206	1.45072	0.157995	0.147304	0.312925	0.473198
ACBD6	2446447	ILMN_1684271	870349	-0.000103335	0.00483963	-0.0249259	-0.0470011	0.0503783	0.0237387	-0.494775	-1.97993	0.620781	0.0481008	0.774349	0.261354
ACBD7	3279058	ILMN_1726388	630678	9.48e-05	0.00153926	0.0394379	-0.0475968	0.0289436	0.0427074	1.36258	-1.11449	0.173077	0.265451	0.334467	0.631817
ACD	3695786	ILMN_1716480	1300154	0.00350127	0.0183136	-0.412356	-0.0734416	0.0931112	0.0189197	-4.42864	-3.88176	9.68e-06	0.000113468	7.54e-05	0.00347911
ACE2	4000605	ILMN_1667018	7100468	0.000714774	1.39e-05	-0.26495	-0.00324616	0.0977665	0.030683	-2.71003	-0.105797	0.00675055	0.915774	0.0249445	0.975605
ACER1	3847754	ILMN_1773243	650131	0.000161649	6.27e-06	-0.0798693	-0.00284418	0.0608847	0.0400328	-1.31181	-0.0710463	0.189643	0.943381	0.355993	0.982888
ACER3	3341061	ILMN_1812552	1230017	0.00402353	0.000345319	0.250486	0.00925539	0.0518482	0.0175454	4.83115	0.527512	1.4e-06	0.598004	1.3e-05	0.857239
ACIN1	3557106	ILMN_1699636	4860204	0.000497747	0.000145672	0.118932	-0.00728257	0.0793452	0.0212581	1.49891	-0.342579	0.133958	0.732017	0.276641	0.910864
ACKR4	2642887	ILMN_1740436	2640167	0.000148208	0.000278861	0.0308609	0.017632	0.0234483	0.0371964	1.31613	0.474023	0.188192	0.63563	0.353998	0.872959
ACLY	3757433	ILMN_2371379	4200259	-7.21e-05	0.00697209	0.040545	-0.0425354	0.076528	0.0178769	0.529806	-2.37936	0.59627	0.0176088	0.757597	0.140149
ACMSD	2507173	ILMN_1727091	20041	0.000136443	0.000258388	0.0859006	0.0133287	0.0631481	0.0292114	1.3603	0.456286	0.173795	0.648325	0.334936	0.877318
ACN9	3013952	ILMN_1771348	520575	-0.000201529	0.000929437	0.0047655	0.0188598	0.0292911	0.0217851	0.162695	0.865721	0.870765	0.386939	0.93299	0.737727
ACO1	3166477	ILMN_1750800	2450608	0.00459946	0.00854046	0.230906	-0.065764	0.0515316	0.0249503	4.48086	-2.6358	7.6e-06	0.00857903	6.04e-05	0.0870913
ACO2	3946889	ILMN_1654861	3930639	0.00753576	0.000614826	0.424972	-0.0124604	0.0727889	0.0176997	5.83842	-0.703989	5.6e-09	0.481673	7.97e-08	0.796965
ACOT12	2864796	ILMN_1785474	2070181	-8.36e-05	6.22e-05	-0.0529498	0.00849823	0.0815513	0.0379765	-0.649283	0.223776	0.516185	0.822997	0.693727	0.947262
ACOT13	2898562	ILMN_2098743	1580427	0.00012991	0.000403853	0.0626321	0.0123609	0.0403728	0.0216672	1.55134	0.570491	0.120882	0.568527	0.256043	0.844312
ACOT4	3543714	ILMN_1764321	4780709	-0.000203438	0.000739147	0.0168753	0.0172914	0.0380705	0.0223998	0.443265	0.771944	0.657593	0.440407	0.803406	0.774344
ACOT7	2394626	ILMN_1788078	1110327	-0.000195062	3.86e-06	0.00726193	0.00172878	0.0962125	0.0309904	0.075478	0.0557843	0.939837	0.955529	0.973527	0.985731
ACOT8	3907473	ILMN_1679600	2900291	0.000242278	2.73e-05	-0.102657	-0.00348937	0.0747882	0.0235292	-1.37264	-0.1483	0.169927	0.882149	0.330276	0.964053
ACOX1	3771215	ILMN_1750158	1190327	0.00451584	0.004749	-0.23875	-0.0265248	0.0495591	0.0135248	-4.81747	-1.9612	1.5e-06	0.0502497	1.38e-05	0.267333
ACOX2	2678400	ILMN_1685703	1010114	0.000654009	0.000690783	0.234102	-0.0246485	0.096061	0.0330301	2.43702	-0.746241	0.0148433	0.455771	0.0486302	0.783764
ACOXL	2500165	ILMN_1743680	1300300	-0.000194333	0.0021805	0.0022033	0.0440842	0.071048	0.033222	0.0310114	1.32696	0.975262	0.184952	0.98906	0.528248
ACP1	2466141	ILMN_2344956	6110672	0.0155284	0.0411835	0.284412	0.0681434	0.0323267	0.0115486	8.79806	5.90058	1.88e-18	5.63e-09	9.9e-17	1.11e-06
ACP5	3851072	ILMN_2078599	7050082	-0.000191009	0.000655346	0.0134932	0.0110869	0.0326393	0.0152537	0.413405	0.726834	0.679328	0.46757	0.818508	0.78977
ACP6	2433371	ILMN_2234343	4670671	-0.000277783	0.00153162	-0.051215	-0.0331725	0.0586507	0.0298391	-0.87322	-1.11171	0.382585	0.266641	0.573332	0.633484
ACPL2	2645387	ILMN_2306955	5720537	0.000440052	0.000867666	-0.0654331	0.0196011	0.0497725	0.0234343	-1.31464	0.836428	0.188689	0.403198	0.354674	0.749973
ACPP	2642720	ILMN_1758323	2680725	0.00108811	0.00280839	0.119177	-0.0269712	0.0438047	0.0179034	2.72064	-1.50648	0.00653794	0.132392	0.0242706	0.449205
ACPT	3839499	ILMN_2351906	4260026	-0.000199072	0.000175639	-0.0151365	0.0103006	0.0909345	0.0273824	-0.166455	0.376175	0.867805	0.7069	0.931503	0.900283
ACR	3951117	ILMN_1705637	6900576	-0.000218819	0.00143181	-0.0108846	-0.0440706	0.0561534	0.0410027	-0.193837	-1.07482	0.846311	0.282824	0.919825	0.648036
ACRC	3981164	ILMN_1666690	3850192	0.00932949	0.00557591	0.332555	0.0639388	0.051619	0.0300731	6.4425	2.12611	1.28e-10	0.0338417	2.4e-09	0.212987
ACRV1	3396660	ILMN_1654468	2570576	-7.57e-05	0.00304314	-0.045118	0.0510858	0.0645668	0.032572	-0.69878	1.5684	0.484722	0.117239	0.66472	0.41983
ACSBG1	3634529	ILMN_2227011	2480730	-1.17e-06	0.00624015	0.0601774	0.057735	0.0863427	0.0256594	0.69696	2.25005	0.48586	0.0247542	0.665479	0.175001
ACSBG2	3818268	ILMN_1730002	1660376	-0.000119263	0.00359095	-0.0279593	-0.0642402	0.0848314	0.0376938	-0.329587	-1.70426	0.741726	0.0887739	0.857543	0.367603
ACSF3	3673806	ILMN_1716832	5820142	1.23e-05	0.00135337	-0.103655	-0.0269516	0.0866825	0.025793	-1.1958	-1.04492	0.231832	0.29642	0.409937	0.660883
ACSL1	2796553	ILMN_1684585	1030431	0.000557352	0.000184874	0.0686388	-0.00367975	0.0388492	0.0095345	1.7668	-0.38594	0.0773219	0.699658	0.18313	0.898106
ACSL3	2529546	ILMN_1666096	3930593	0.00155523	0.00282266	-0.203017	0.0451812	0.0645696	0.0299149	-3.14416	1.51032	0.0016753	0.131411	0.00756079	0.447949
ACSL4	4017810	ILMN_2285506	3990747	0.00150542	0.000580869	-0.171971	0.021603	0.0574037	0.0315714	-2.99581	0.684258	0.00275046	0.494038	0.0116578	0.805111
ACSL5	3264326	ILMN_2273911	2320332	0.0119638	0.00118286	0.477834	0.026452	0.0668635	0.0270807	7.14641	0.976783	1.02e-12	0.329013	2.58e-11	0.691059
ACSM1	3683740	ILMN_1661434	5870669	-0.000199163	0.00596577	0.00338291	-0.0891288	0.0649436	0.040519	0.05209	-2.19968	0.958459	0.0281545	0.982095	0.191339
ACSM2B	3683651	ILMN_1765912	3390280	-0.000180457	7.93e-05	0.0121296	0.00692942	0.012622	0.027417	0.960992	0.252742	0.336602	0.800541	0.525669	0.938652
ACSM5	3651294	ILMN_1805147	4250139	0.000269884	0.001134	-0.104271	-0.0264997	0.0670536	0.0277086	-1.55504	-0.95637	0.119998	0.339214	0.254709	0.6998
ACSS3	3424218	ILMN_1659885	2810154	0.00229905	0.00177286	-0.211633	0.0326945	0.0677816	0.0273312	-3.12228	1.19623	0.00180471	0.232009	0.00807528	0.591559
ACTA1	2459837	ILMN_2125869	5080132	6.32e-05	1.88e-05	0.124749	-0.00522938	0.0902735	0.0425259	1.3819	-0.122969	0.167064	0.902166	0.3258	0.969596
ACTB	3036924	ILMN_2152131	4610390	-0.000121858	0.0058129	0.00434382	-0.0408363	0.00929315	0.0188089	0.467422	-2.17112	0.640218	0.0302559	0.790734	0.199991
ACTC1	3617719	ILMN_1658660	4260201	-6.14e-07	4.59e-05	-0.0474382	0.00779715	0.0417327	0.0405389	-1.13672	0.192337	0.255711	0.847533	0.437684	0.953841
ACTG1	3773932	ILMN_2053178	3310424	0.000357126	0.00524685	-0.0972256	-0.0360116	0.0577185	0.0174641	-1.68448	-2.06203	0.0921508	0.0395717	0.208268	0.234319
ACTG2	2489007	ILMN_1795325	4610431	-0.000144885	0.0048129	0.0275773	0.0773401	0.0600969	0.0391709	0.458881	1.97443	0.646339	0.0487243	0.795302	0.262676
ACTL6A	2654023	ILMN_2328280	5220358	-0.000253976	0.000303786	0.0388157	-0.0121639	0.0745939	0.0245854	0.52036	-0.494762	0.602836	0.620923	0.762562	0.866962
ACTL6B	3064204	ILMN_1657855	4810100	0.00081406	0.0127837	-0.204552	0.10257	0.0924579	0.0317286	-2.21238	3.23273	0.0269848	0.00128339	0.0794253	0.0223752
ACTL7A	3184204	ILMN_1717900	6960669	-0.000153281	0.000437928	-0.0189061	0.0250517	0.0273751	0.0421688	-0.690631	0.594083	0.489829	0.552648	0.668908	0.834736
ACTL7B	3219543	ILMN_1796088	7550092	-0.000192687	1.93e-05	-0.0049041	-0.00321105	0.0541623	0.0257745	-0.0905446	-0.124582	0.927858	0.90089	0.966686	0.968655
ACTL8	2323087	ILMN_1704078	1450100	-0.000204813	0.000122869	0.0162205	0.0104724	0.0469074	0.0332857	0.345798	0.314622	0.729509	0.753142	0.849414	0.920049
ACTL9	3849190	ILMN_1656193	4590184	-9.41e-05	0.000635702	0.0239338	-0.0315281	0.0494041	0.0440429	0.48445	-0.715849	0.628088	0.474322	0.781139	0.79476
ACTN2	2386943	ILMN_1654422	670196	-0.00017712	0.000246697	-0.0192359	0.0137531	0.0989312	0.0308476	-0.194437	0.44584	0.845841	0.65585	0.919678	0.880262
ACTN3	3336324	ILMN_1665691	830348	-2.17e-05	0.000173418	-0.088565	-0.0131219	0.100839	0.0351051	-0.878284	-0.373789	0.379832	0.708674	0.570965	0.900662
ACTN4	3832643	ILMN_1725534	270437	0.0021096	0.00648855	-0.196475	-0.0355372	0.0588148	0.0154865	-3.34058	-2.29473	0.000842121	0.0220427	0.00418111	0.162257
ACTR10	3537813	ILMN_1798254	2630064	-0.000128248	0.00801568	-0.0600903	0.042838	0.0591627	0.016781	-1.01568	2.55276	0.309832	0.0108974	0.496341	0.10227
ACTR1A	3304406	ILMN_1792314	4280561	0.00126035	0.00572129	0.140267	-0.0412288	0.0609553	0.0191421	2.30115	-2.15383	0.0214236	0.0315927	0.0657559	0.203906
ACTR1B	2566021	ILMN_1695821	2120088	9.33e-05	0.000810383	-0.0765176	-0.0171409	0.0604397	0.0212055	-1.26602	-0.80832	0.205566	0.41918	0.378121	0.760138
ACTR2	2485784	ILMN_2388605	5570196	0.000842204	0.00114024	-0.128542	0.0123519	0.0586152	0.01288	-2.19298	0.958998	0.0283541	0.33789	0.0823902	0.698797
ACTR3	2501697	ILMN_1657153	6940176	-0.000130149	0.00492634	-0.0415524	0.0214056	0.0757826	0.0107152	-0.54831	1.99769	0.583503	0.0461352	0.748639	0.254626
ACTR3C	3078948	ILMN_1694898	2320300	-1.58e-05	0.00066337	-0.0556166	-0.0203131	0.0458636	0.0277777	-1.21265	-0.731273	0.22532	0.464856	0.402417	0.788418
ACTR6	3428088	ILMN_1697585	1580168	0.00353402	0.0117634	-0.198122	0.0440737	0.0455186	0.014221	-4.35254	3.0992	1.37e-05	0.00201782	0.000103158	0.0312127
ACTR8	2676901	ILMN_1689162	270278	0.000538173	0.000578079	0.109771	0.0181591	0.0586286	0.0266024	1.8723	0.682612	0.0612222	0.495077	0.152675	0.805244
ACTRT1	4020991	ILMN_1815392	2710368	-0.000209626	0.0049874	-0.0136875	0.0187737	0.0513946	0.00933969	-0.266323	2.0101	0.790002	0.0448021	0.888181	0.25075
ACTRT2	2316905	ILMN_1776442	2600754	-0.000152071	0.000391331	0.0334574	-0.0164863	0.060413	0.0293574	0.55381	-0.561572	0.579733	0.574586	0.746026	0.84684
ACTRT3	2704733	ILMN_1782810	2480615	0.000430955	0.00876642	0.0789965	0.0978452	0.0401088	0.0366353	1.96956	2.67079	0.048944	0.00774231	0.127684	0.0815514
ACVR1	2582562	ILMN_1760490	6940360	0.00853274	0.00065917	0.394638	-0.0122372	0.0623426	0.0167874	6.33015	-0.728952	2.66e-10	0.466274	4.71e-09	0.788796
ACVR2A	2509557	ILMN_1670912	4260681	0.000314561	0.000803463	0.074756	0.0234757	0.0491452	0.0291675	1.52113	0.804858	0.128291	0.421174	0.267504	0.761239
ACVR2B	2617752	ILMN_1668983	610564	-0.000206531	2.31e-05	0.0118505	-0.00509669	0.0722136	0.0373633	0.164104	-0.136409	0.869656	0.891537	0.932802	0.966239
ACY3	3379063	ILMN_1670193	1170228	-0.000196118	1.54e-05	0.00528648	-0.00423639	0.0846342	0.0380057	0.0624627	-0.111467	0.950197	0.911278	0.977906	0.972875
ACYP1	3572263	ILMN_1694233	5910148	-0.000147128	0.000248024	-0.0185181	-0.00911145	0.0469574	0.0203818	-0.39436	-0.447039	0.693332	0.654985	0.826757	0.879702
ACYP2	2482316	ILMN_1697550	130367	-0.000112294	7.07e-06	-0.0364459	-0.00200543	0.0471476	0.0265718	-0.773018	-0.0754724	0.439548	0.93986	0.625183	0.982074
ADA	3907011	ILMN_1803686	7210192	0.00492334	0.00015437	0.355984	0.00498831	0.0708884	0.0141448	5.02175	0.35266	5.3e-07	0.724449	5.34e-06	0.90735
ADAD1	2742009	ILMN_1745580	3140326	0.000276326	0.0022029	-0.0297051	0.0373429	0.0213944	0.0279979	-1.38845	1.33377	0.165061	0.18271	0.323391	0.525705
ADAD2	3671651	ILMN_1745108	3400424	0.00114327	5.57e-05	-0.25136	-0.00873416	0.114013	0.0412152	-2.20465	-0.211916	0.0275236	0.832234	0.0805586	0.950869
ADAM10	3626555	ILMN_1718946	5290300	0.00166242	0.00171009	-0.227428	0.0214077	0.0797098	0.0182221	-2.85321	1.17482	0.00434568	0.240464	0.0172425	0.604119
ADAM11	3723128	ILMN_1711374	1260661	0.000405344	0.000174279	0.264234	-0.0108039	0.136643	0.0288321	1.93375	-0.374716	0.0531994	0.707984	0.136452	0.900283
ADAM12	3311832	ILMN_1726266	520689	-0.000198588	0.00181044	-0.000326525	-0.0353157	0.080792	0.0292139	-0.00404156	-1.20887	0.996775	0.22712	0.998555	0.584582
ADAM17	2539821	ILMN_2121068	5260546	0.00370649	0.00281092	0.255268	-0.027035	0.0603805	0.0179377	4.22766	-1.50717	2.4e-05	0.132217	0.000170438	0.449205
ADAM18	3095152	ILMN_2201386	6560010	-0.000197084	4.07e-05	0.00376726	0.00726643	0.0809795	0.0401298	0.0465211	0.181073	0.962897	0.856362	0.983575	0.955657
ADAM2	3132393	ILMN_1662675	6110315	-0.000132066	0.0011318	-0.0619189	0.0259145	0.097933	0.0271231	-0.632258	0.95544	0.527247	0.339684	0.703814	0.700169
ADAM23	2524653	ILMN_2060086	110731	0.00236871	0.00268913	0.134481	-0.0429365	0.0408926	0.0291282	3.28864	-1.47405	0.00101362	0.140916	0.00489543	0.463742
ADAM30	2431211	ILMN_2100871	830601	3.32e-05	4.99e-05	0.0533092	0.00650512	0.0643833	0.0324311	0.827998	0.200583	0.407711	0.841083	0.596662	0.952315
ADAM32	3095057	ILMN_1806841	5050328	-3.98e-05	0.00228626	-0.0624297	0.0388984	0.0656972	0.0286261	-0.950265	1.35884	0.342023	0.174632	0.531928	0.513876
ADAM5	3095114	ILMN_1793072	6130437	-4.67e-05	0.00393237	-0.0482146	-0.0589051	0.0752174	0.0330224	-0.641003	-1.78379	0.52155	0.0748885	0.699309	0.335218
ADAM7	3090326	ILMN_1750294	1260424	0.000705066	7.5e-05	-0.197206	0.00960115	0.0897798	0.0390559	-2.19655	0.245831	0.0280978	0.805885	0.0817823	0.940524
ADAM9	3095002	ILMN_1727524	2940730	0.0057261	0.000541049	-0.193049	0.0210256	0.036282	0.0318389	-5.3208	0.660373	1.08e-07	0.509231	1.23e-06	0.811055
ADAMDEC1	3090294	ILMN_1716909	1690192	0.000167429	8.75e-09	0.0970652	8.36e-05	0.0739301	0.0315047	1.31293	0.00265475	0.189265	0.997883	0.355573	0.998888
ADAMTS10	3849117	ILMN_1751168	840370	-0.000151368	0.00383638	-0.0462004	0.0632252	0.12625	0.0358869	-0.365945	1.76179	0.714422	0.0785394	0.840783	0.345275
ADAMTS12	2852591	ILMN_1660970	4060682	-0.000185742	0.00425469	-0.0443508	0.0704795	0.108639	0.037978	-0.408241	1.8558	0.683114	0.0639002	0.820475	0.306284
ADAMTS15	3356328	ILMN_1683781	6520458	-3.75e-05	0.00114334	0.0575224	0.0253111	0.0625892	0.0263574	0.919047	0.960305	0.358115	0.337232	0.549228	0.698192
ADAMTS16	2800026	ILMN_1726247	7320519	-0.000201175	5.45e-05	0.00960389	0.00786662	0.117441	0.0375335	0.0817764	0.20959	0.934828	0.834049	0.971093	0.951346
ADAMTS17	3641633	ILMN_1682989	1570435	-0.000190038	0.00036925	0.0339677	0.014787	0.120117	0.0271076	0.282789	0.545493	0.77735	0.585588	0.880364	0.851444
ADAMTS18	3700158	ILMN_1770152	3290133	-0.000106617	0.000290358	-0.0889167	-0.0216558	0.111329	0.0447712	-0.798681	-0.4837	0.424513	0.62875	0.610864	0.870574
ADAMTS19	2827772	ILMN_1656171	70487	0.000517773	3.14e-05	0.18565	0.00588067	0.112927	0.0369986	1.64398	0.158943	0.100243	0.873759	0.222045	0.960953
ADAMTS2	2889916	ILMN_1811765	7150609	-0.000190496	0.000760431	-0.00925313	0.0235677	0.114011	0.0300997	-0.0811599	0.782989	0.935318	0.433897	0.971278	0.769962
ADAMTS20	3451558	ILMN_1651717	4060747	0.00090081	0.00137759	-0.325161	-0.0291381	0.129243	0.0276389	-2.5159	-1.05424	0.0119038	0.292135	0.0406767	0.657003
ADAMTS3	2772876	ILMN_1703803	2120364	0.00126137	0.00555485	0.211083	0.0560336	0.0778867	0.0264052	2.71014	2.12207	0.00674833	0.0341812	0.024944	0.213997
ADAMTS4	2440700	ILMN_2092933	1660497	-1.83e-05	0.000139468	0.0854899	-0.0111	0.092044	0.0331144	0.928793	-0.335203	0.353041	0.737572	0.54366	0.913268
ADAMTS5	3927480	ILMN_1681886	6180332	-0.000195863	0.00266358	-0.000807476	0.0608139	0.0592507	0.0414543	-0.0136281	1.46701	0.989127	0.14282	0.995403	0.466518
ADAMTS6	2859601	ILMN_1767362	20100	-1.74e-05	0.000817541	-0.0564188	-0.0216585	0.0494768	0.0266768	-1.14031	-0.811886	0.254212	0.417132	0.435926	0.758406
ADAMTS7	3634742	ILMN_2211790	3440451	0.000657173	0.000742087	-0.170366	-0.0206799	0.0923604	0.0267362	-1.84458	-0.773479	0.0651573	0.439499	0.160332	0.773736
ADAMTS8	3398328	ILMN_1672403	2480239	-0.000186335	0.000391716	0.0181102	0.0128015	0.099343	0.0227845	0.1823	0.561849	0.855354	0.574398	0.924231	0.846818
ADAMTS9	2680046	ILMN_1805543	1570382	2.35e-05	2.72e-05	-0.111135	-0.00584601	0.123609	0.0395214	-0.899085	-0.14792	0.36865	0.882448	0.559854	0.964053
ADAMTSL1	3163982	ILMN_1722621	6180209	-0.000193955	0.0026531	0.0180007	-0.0615113	0.0944764	0.0420127	0.190531	-1.46411	0.848901	0.14361	0.921306	0.467279
ADAMTSL3	3605395	ILMN_1798690	6280286	-5.85e-05	6.12e-05	-0.134212	0.0055511	0.118272	0.024997	-1.13477	0.22207	0.256526	0.824324	0.438527	0.94751
ADAMTSL5	3845263	ILMN_1793040	3460356	-0.000174737	0.000452266	0.0665969	0.0153733	0.0846117	0.0254637	0.787089	0.603735	0.431267	0.546215	0.617266	0.830932
ADAP1	3034987	ILMN_2047511	830735	0.00680252	0.032141	-0.423461	-0.0737849	0.072358	0.0142316	-5.85231	-5.18459	5.15e-09	2.83e-07	7.41e-08	2.97e-05
ADAP2	3716950	ILMN_1763000	3990433	0.00732651	0.000341611	0.377886	0.00805907	0.0633356	0.0153602	5.96641	0.524671	2.59e-09	0.599977	3.91e-08	0.857773
ADARB2	3273667	ILMN_1749493	6110519	0.00125518	0.00027428	-0.28452	-0.0121056	0.102517	0.0257503	-2.77534	-0.470113	0.00553472	0.63842	0.0211122	0.873876
ADAT1	3699707	ILMN_1657139	1710204	0.00305645	0.00139489	0.176013	-0.020759	0.0521373	0.0195683	3.37595	-1.06085	0.000741159	0.289122	0.00374464	0.653766
ADAT2	2977471	ILMN_1786688	2230722	0.00135149	0.000217884	0.124993	-0.016358	0.0480821	0.0390414	2.59958	-0.41899	0.00936097	0.675351	0.033021	0.889232
ADC	2329196	ILMN_1659599	130707	0.000674159	0.00260747	0.165606	-0.0489862	0.0851712	0.0337503	1.94439	-1.45143	0.0519039	0.147106	0.13367	0.473198
ADCK2	3027503	ILMN_1663132	1780647	-0.000179021	0.00213937	-0.0108025	-0.0226818	0.0603031	0.017257	-0.179136	-1.31435	0.857838	0.189156	0.925097	0.533982
ADCK3	2383356	ILMN_1731064	6220180	0.00379859	0.0114938	-0.328512	-0.0447612	0.0811677	0.0146135	-4.04733	-3.06301	5.26e-05	0.00227493	0.000349861	0.0341806
ADCK5	3120481	ILMN_1761309	2480709	-0.000177485	4.73e-05	0.0792302	-0.00521057	0.101864	0.0266833	0.777808	-0.195274	0.436719	0.845235	0.622629	0.953111
ADCY1	3000342	ILMN_1742073	610592	-0.000187207	0.000372834	0.0162925	0.0181106	0.119297	0.0330404	0.136571	0.548134	0.891376	0.583774	0.9442	0.851127
ADCY2	2800711	ILMN_1810691	2970288	-0.000159962	0.00159793	-0.0487155	-0.032146	0.112928	0.0283083	-0.431384	-1.13557	0.666208	0.256525	0.809662	0.622888
ADCY3	2544484	ILMN_1676893	3800050	-3.1e-05	0.000748735	0.102616	-0.0137598	0.0926858	0.0177102	1.10714	-0.776939	0.268288	0.437456	0.45196	0.772924
ADCY4	3558168	ILMN_2148944	6330224	0.00116103	0.00569224	-0.234625	-0.0499231	0.0951137	0.0232382	-2.46678	-2.14832	0.0136664	0.0320293	0.0454539	0.205622
ADCY7	3659966	ILMN_1655935	50735	-0.000199147	2.91e-05	-0.0775405	-0.00295708	0.110679	0.019321	-0.700588	-0.15305	0.483592	0.878403	0.664154	0.963129
ADCY8	3153716	ILMN_1754440	5310431	0.000145107	0.00238214	-0.129822	-0.0470661	0.105694	0.0339309	-1.22829	-1.38712	0.219396	0.165845	0.395589	0.50033
ADCY9	3677913	ILMN_1654287	3060100	0.00285103	0.000954885	0.258291	-0.0219994	0.0689077	0.0250704	3.74836	-0.877505	0.000179985	0.380512	0.00105951	0.732335
ADCYAP1	3775906	ILMN_1763344	3060064	-0.000134201	0.0007129	0.0275306	-0.0327663	0.0716277	0.0432215	0.384356	-0.758103	0.70073	0.448643	0.831589	0.777752
ADD3	3263555	ILMN_2311278	3420747	-0.000196451	0.00110549	-0.00764834	0.0156346	0.0666975	0.0165576	-0.114672	0.944257	0.90871	0.345363	0.954577	0.70512
ADH1A	2779199	ILMN_1764309	3370347	-0.000132704	0.00145064	0.0144021	-0.0327734	0.0329731	0.0302932	0.436784	-1.08187	0.662287	0.279679	0.80685	0.645473
ADH1B	2779231	ILMN_1811598	2490612	-5.9e-05	1.16e-05	0.0437126	0.00321574	0.0529635	0.0332609	0.825335	0.0966821	0.409221	0.923006	0.597783	0.977662
ADH1C	2779271	ILMN_1740717	1510750	-0.000201035	4.77e-06	0.00848825	-0.00163396	0.0471174	0.0263494	0.180151	-0.0620112	0.857041	0.950572	0.924871	0.984504
ADH4	2779124	ILMN_2136010	5490382	-0.000186609	0.000460633	0.00537683	0.0145137	0.0740517	0.0238204	0.0726091	0.609296	0.94212	0.542525	0.973883	0.829833
ADH5	2779095	ILMN_1738604	1470035	2.85e-05	0.00365213	-0.080029	0.0478507	0.0602877	0.0278399	-1.32745	1.71878	0.184419	0.0860945	0.349137	0.362153
ADH6	2779163	ILMN_1691175	3800368	-0.000199057	0.00189242	-0.0138533	0.0403526	0.0694357	0.0326479	-0.199513	1.23599	0.841869	0.216873	0.91798	0.571576
ADHFE1	3101629	ILMN_1702858	2760121	0.00302952	0.00887501	0.1945	-0.0486549	0.0511714	0.0181045	3.80095	-2.68745	0.000145843	0.00737027	0.000876512	0.0789438
ADI1	2538600	ILMN_1813975	6620278	2.21e-05	8.61e-05	0.0382623	-0.0040644	0.0546973	0.0154338	0.699528	-0.263345	0.484254	0.792362	0.664577	0.933874
ADIG	3884737	ILMN_1743331	3800722	-0.00028225	0.000364208	-0.0779431	-0.0239941	0.0596387	0.0442897	-1.30692	-0.541754	0.191299	0.58816	0.358333	0.85258
ADIPOQ	2656818	ILMN_1775045	4200471	-7.08e-05	0.00263301	0.0482154	-0.0332676	0.0533135	0.0228088	0.904375	-1.45854	0.36584	0.145138	0.556783	0.469505
ADIPOR1	2451463	ILMN_2096322	3460201	0.0213666	0.0361455	0.381474	0.0372246	0.0370558	0.00675431	10.2946	5.51123	1.3e-24	5.01e-08	1.34e-22	6.78e-06
ADIPOR2	3400625	ILMN_2224833	6960685	-0.000112643	0.00569701	-0.0417168	-0.0351115	0.0715189	0.0163368	-0.583297	-2.14923	0.559719	0.0319572	0.729384	0.205269
ADK	3252170	ILMN_2358626	1030241	0.00251143	0.000385535	-0.145559	-0.00821089	0.0454116	0.0147308	-3.20533	-0.557396	0.00135749	0.577434	0.00634762	0.847773
ADM	3320123	ILMN_1708934	5670465	-0.000177205	0.00201098	-0.0273731	0.0108701	0.0679171	0.00853085	-0.403037	1.27421	0.686938	0.20301	0.822734	0.551511
ADM2	3950832	ILMN_1702933	2970452	0.00120953	8.58e-05	-0.256983	0.00814276	0.100315	0.0309757	-2.56177	0.262876	0.0104429	0.792723	0.0362329	0.933938
ADNP	3909354	ILMN_1666019	1770551	-0.000201124	0.0141423	-0.0336328	-0.079652	0.0590787	0.0234074	-0.569289	-3.40286	0.569186	0.000704648	0.737018	0.0142228
ADNP2	3795501	ILMN_2080751	7330270	0.00265528	0.00590701	0.21548	-0.0517844	0.0646146	0.0236594	3.33485	-2.18874	0.000859612	0.0289436	0.00426081	0.194574
ADO	3248824	ILMN_1690352	4480546	0.000356222	0.00185046	0.0735286	0.0252692	0.0548566	0.0206754	1.34038	1.22219	0.180182	0.222047	0.343431	0.577398
ADORA2B	3711869	ILMN_1703946	2060040	-0.000115941	4.64e-05	-0.0353891	-0.00587228	0.056079	0.03039	-0.631059	-0.193231	0.528031	0.846834	0.704548	0.95378
ADPRH	2638059	ILMN_1794512	5550369	-0.000163935	0.000462717	-0.0340647	-0.016618	0.0532955	0.0272126	-0.639166	-0.610674	0.522744	0.541613	0.700059	0.829346
ADPRHL1	3526524	ILMN_1788530	5570446	-6.92e-05	0.00120948	-0.0706317	-0.0266237	0.076415	0.0269545	-0.924317	-0.987728	0.355365	0.323625	0.546263	0.686444
ADPRHL2	2330253	ILMN_1811480	730010	0.00020163	0.0156293	-0.0721632	-0.0723482	0.0654171	0.0202068	-1.10312	-3.58038	0.270026	0.000366703	0.45377	0.00830596
ADPRM	3710277	ILMN_1702526	6580129	0.00324027	0.00285771	-0.151472	0.0346856	0.0388403	0.022824	-3.89987	1.5197	9.75e-05	0.129036	0.000611554	0.44286
ADRA1B	2837970	ILMN_1679754	2140022	-0.000175197	0.0102664	0.0464238	0.107914	0.0731235	0.0373046	0.634869	2.89278	0.525543	0.00393656	0.702129	0.0507332
ADRA1D	3895891	ILMN_1716421	1340630	-0.000207822	0.000373001	0.0102683	-0.0213946	0.0588759	0.0390228	0.174406	-0.548257	0.861553	0.583689	0.926939	0.851127
ADRA2A	3264059	ILMN_1659371	5720523	-0.000154563	0.013867	0.0363662	0.06953	0.0851128	0.020638	0.427271	3.36903	0.6692	0.000795488	0.811707	0.0154717
ADRA2B	2565082	ILMN_1677868	3390286	8.02e-05	0.00759473	0.0648717	0.0524486	0.0734586	0.0211127	0.883106	2.48422	0.377221	0.0132153	0.56826	0.116321
ADRA2C	2716328	ILMN_1733963	3460672	0.00131373	0.0129162	-0.237509	0.035484	0.0889376	0.0109192	-2.67051	3.24968	0.00759791	0.00121036	0.0277271	0.0214483
ADRB1	3265140	ILMN_1804255	7050440	0.000521744	0.00243368	-0.133301	0.0397656	0.0775236	0.0283618	-1.71949	1.40208	0.0855867	0.161331	0.197344	0.493913
ADRB2	2834743	ILMN_1695590	7570326	-0.000198677	0.000415117	0.00774201	-0.00775103	0.0607391	0.0134009	0.127463	-0.578396	0.898579	0.563182	0.94815	0.840935
ADRB3	4049835	ILMN_1694007	1430722	-5.47e-05	0.00394909	0.0318041	-0.0523628	0.0481952	0.0292923	0.659901	-1.7876	0.509347	0.0742717	0.687921	0.333758
ADRBK2	3940631	ILMN_1668900	2120528	0.0113154	5.81e-06	0.390208	0.00209384	0.0513057	0.0306166	7.60554	0.068389	3.36e-14	0.945495	1.03e-12	0.983531
ADSS	2464353	ILMN_1778796	6020333	0.000950936	0.000151036	-0.120889	0.00660811	0.0560351	0.0189436	-2.15737	0.348831	0.0310236	0.727321	0.0886073	0.908522
ADSSL1	3554360	ILMN_1720235	4830372	-0.000192733	0.000130925	0.00625169	0.0111022	0.0954562	0.0341844	0.0654928	0.324774	0.947784	0.745449	0.976827	0.916048
AEBP1	2999755	ILMN_1736178	6580711	2.33e-05	0.00248057	-0.068101	-0.0323093	0.103272	0.0228243	-0.65943	-1.41557	0.50965	0.157346	0.688085	0.485784
AEBP2	3407229	ILMN_1803376	4260671	0.00051916	0.00339895	0.1096	0.0389127	0.0687476	0.0234712	1.59424	1.65789	0.110945	0.0977853	0.240058	0.384307
AEN	3607232	ILMN_1814282	4480288	-0.000191672	0.00221621	-0.0076636	0.0251262	0.0631409	0.0187816	-0.121373	1.33781	0.9034	0.181391	0.951405	0.523694
AES	3846114	ILMN_2333107	6180176	0.00379774	0.000892559	0.292046	0.0133684	0.0679122	0.015758	4.30035	0.848354	1.74e-05	0.39653	0.00012681	0.745892
AFAP1	2759582	ILMN_1701998	2690187	-8.87e-05	0.000191138	0.0265785	-0.00810467	0.0729993	0.0206527	0.364092	-0.392426	0.715805	0.694862	0.841621	0.895614
AFAP1L1	2834957	ILMN_1694140	20154	9.13e-05	0.00263792	0.13746	0.0385706	0.0792188	0.0264199	1.73519	1.4599	0.0827681	0.144763	0.192688	0.469046
AFF4	2875555	ILMN_1708502	2360189	0.00238646	0.00155423	0.254783	-0.0183674	0.0767208	0.0164008	3.32092	-1.11991	0.000903602	0.263136	0.00444424	0.629126
AFG3L2	3799415	ILMN_2066124	1170538	0.000693284	0.00995378	0.0969262	-0.0546254	0.0566876	0.0191811	1.70983	-2.84788	0.0873588	0.00452968	0.200349	0.0562855
AFM	2731257	ILMN_1777797	3120681	0.000359375	0.000153068	-0.121991	-0.013165	0.0735421	0.0374889	-1.6588	-0.35117	0.0972192	0.725566	0.216956	0.907805
AFP	2731230	ILMN_1782204	2030161	-0.000130601	0.00327095	-0.0411998	-0.0486219	0.0769237	0.0298981	-0.535594	-1.62625	0.592263	0.104344	0.755214	0.397197
AFTPH	2485433	ILMN_1767722	2070600	-0.000137383	0.00182157	0.0309618	-0.0338911	0.0861735	0.0279494	0.359296	-1.21259	0.719389	0.225694	0.843663	0.582858
AGA	2794902	ILMN_1802631	130064	0.00232812	0.000862058	0.181999	0.016105	0.0505279	0.019317	3.60194	0.833718	0.000318888	0.404723	0.00177689	0.750962
AGAP1	2533670	ILMN_2318481	2340563	-0.000213013	0.00302664	0.0189622	-0.0598065	0.0600638	0.0382364	0.315702	-1.56412	0.752242	0.118238	0.864193	0.422432
AGAP11	3256221	ILMN_1669848	2260341	-0.000138997	0.000374857	0.0123761	0.0166072	0.0252494	0.0302159	0.490154	0.54962	0.624046	0.582754	0.777316	0.851127
AGAP2	3458735	ILMN_1735591	3140608	0.00221952	0.00346178	-0.337897	0.0606478	0.104508	0.0362464	-3.23323	1.67321	0.00123188	0.0947317	0.00583955	0.378362
AGBL1	3606682	ILMN_2100055	990220	-0.000195593	0.00024182	-0.0270754	0.017448	0.0634811	0.0395279	-0.426511	0.441411	0.669754	0.659051	0.811843	0.882201
AGBL2	3372420	ILMN_1688627	4890338	0.00402349	0.00101873	0.247596	-0.0281989	0.054379	0.031111	4.55315	-0.906398	5.41e-06	0.365036	4.43e-05	0.722972
AGBL4	2411642	ILMN_2196642	520379	-4.15e-05	0.000544597	-0.0740404	-0.0262907	0.0707569	0.0396818	-1.04641	-0.662536	0.295424	0.507845	0.481388	0.810529
AGBL5	2474161	ILMN_2290776	6620403	0.0023144	5.57e-05	0.258984	0.00665087	0.070927	0.0313907	3.65141	0.211874	0.000263442	0.832267	0.00149177	0.950869
AGFG1	2530599	ILMN_2196734	1500341	0.000382376	0.00273128	-0.14286	-0.0446477	0.0743051	0.0300538	-1.92261	-1.48559	0.0545847	0.137835	0.139391	0.459322
AGFG2	3015603	ILMN_1703228	7160193	0.000764695	0.00175873	-0.192782	-0.0258947	0.0858251	0.0217338	-2.24622	-1.19144	0.024733	0.233881	0.0739169	0.594195
AGGF1	2816563	ILMN_2064917	70239	0.000941003	0.000330945	-0.185288	0.0106279	0.0899395	0.0205803	-2.06014	0.516412	0.0394361	0.605729	0.107829	0.860927
AGK	3027808	ILMN_1772645	7560452	0.00235074	8.36e-07	0.202954	0.000580036	0.0578985	0.0223569	3.50535	0.0259443	0.000459977	0.979309	0.00246234	0.993319
AGL	2348634	ILMN_1680343	1440661	0.000133656	0.00492484	-0.102288	0.0560683	0.075666	0.0280709	-1.35183	1.99738	0.17649	0.0461685	0.338486	0.254626
AGMAT	2397732	ILMN_1707169	4890255	0.00111725	0.000413655	0.193748	-0.0138462	0.074776	0.0239813	2.59105	-0.577376	0.00959602	0.56387	0.0337218	0.841733
AGMO	3039399	ILMN_1812678	70279	-0.000201264	0.000130697	-0.0465541	0.0102298	0.076032	0.0315259	-0.612297	0.32449	0.540369	0.745664	0.714288	0.916048
AGO1	2330075	ILMN_1671326	1710102	0.000813834	0.00383844	0.179483	-0.0327581	0.0759568	0.0185886	2.36296	-1.76226	0.0181673	0.0784593	0.0573831	0.345175
AGO2	3156193	ILMN_1695719	290468	0.0189618	0.00777191	0.616717	0.0276145	0.0639282	0.0109874	9.64703	2.51329	7.8e-22	0.0121836	6.07e-20	0.110302
AGPAT2	3230282	ILMN_2377430	5560102	0.000607111	0.00516991	-0.134787	-0.0310872	0.089751	0.0151885	-1.50179	-2.04677	0.133213	0.0410524	0.27548	0.239153
AGPAT3	3923354	ILMN_1654010	3850435	0.0142012	0.000327167	0.589366	0.0132791	0.0704451	0.0258622	8.36631	0.513456	7.61e-17	0.607794	3.19e-15	0.861379
AGPAT4	2983030	ILMN_1730504	3440025	0.00327087	0.000729811	0.251141	-0.0152202	0.0639287	0.0198425	3.92846	-0.767049	8.66e-05	0.44331	0.000549749	0.77486
AGPAT4-IT1	2983138	ILMN_1655572	110048	0.00156028	0.00388441	0.0904372	-0.0398613	0.0320029	0.0224845	2.8259	-1.77283	0.00473328	0.0766896	0.0185182	0.340748
AGPAT5	3083936	ILMN_1662049	830719	0.00101729	0.000667662	0.119565	0.0191362	0.0544064	0.026084	2.19762	0.733637	0.0280212	0.463415	0.0816184	0.787983
AGPAT6	3095815	ILMN_1740752	4560156	0.00169013	0.000133991	0.2006	-0.00964061	0.0642521	0.0293425	3.12208	-0.328555	0.00180591	0.74259	0.00807768	0.915529
AGPAT9	2734047	ILMN_1794875	2060477	0.00532985	0.00846471	-0.259051	-0.0375032	0.0490997	0.0142925	-5.27602	-2.62397	1.38e-07	0.00887974	1.54e-06	0.0893909
AGPS	2517408	ILMN_1698209	7560154	-1.34e-05	0.000600379	-0.0542329	0.0160418	0.0649427	0.0230597	-0.835089	0.695663	0.403707	0.48687	0.592819	0.800445
AGR3	3039830	ILMN_1728787	5290273	-0.000180335	0.00227982	0.0302941	0.0384247	0.0629074	0.0283176	0.481566	1.35692	0.630135	0.175242	0.782797	0.515043
AGRP	3695726	ILMN_1714253	7160121	0.00168612	5.09e-06	-0.153482	-0.00254658	0.0519097	0.0397653	-2.95671	-0.0640403	0.00312383	0.948956	0.013016	0.984373
AGT	2460296	ILMN_1813530	2850301	-0.000151216	0.00121401	-0.0491405	0.0275028	0.0678177	0.0277925	-0.724596	0.989577	0.468734	0.322722	0.650719	0.68554
AGTPBP1	3212728	ILMN_1718071	4760427	0.00820373	0.000107322	-0.385148	0.00487229	0.0642567	0.0165701	-5.99389	0.294041	2.19e-09	0.768813	3.34e-08	0.926125
AGTRAP	2320411	ILMN_2307656	4900685	0.00453682	0.00591514	-0.271622	-0.0345599	0.0558473	0.0157789	-4.86365	-2.19026	1.19e-06	0.0288331	1.12e-05	0.194253
AGXT	2535976	ILMN_1709796	270709	-2.14e-05	3.8e-05	-0.0773194	-0.00537427	0.0975472	0.030733	-0.792635	-0.17487	0.428028	0.861232	0.614235	0.956736
AGXT2	2853055	ILMN_1783963	6350753	0.000946896	0.000143525	0.156386	0.0133059	0.0823269	0.0391297	1.89957	0.340045	0.0575464	0.733924	0.145161	0.911834
AHCYL1	2351121	ILMN_1770412	1170440	0.000971026	0.00350366	0.176775	-0.0333088	0.0788559	0.0197874	2.24175	-1.68334	0.025021	0.092754	0.0746109	0.375188
AHCYL2	3023384	ILMN_1712786	870039	0.0130841	0.000666811	0.569765	-0.0169517	0.0731322	0.0231211	7.79089	-0.733169	8.02e-15	0.4637	2.74e-13	0.787983
AHNAK	3375735	ILMN_1714567	450553	-0.000171171	0.000740618	-0.0154652	-0.00827983	0.0561383	0.0107153	-0.275483	-0.772713	0.782956	0.439952	0.883888	0.773988
AHR	2991233	ILMN_2162799	6060367	0.00113125	0.000354915	0.123128	-0.0139886	0.0520413	0.0261569	2.36597	-0.534795	0.0180205	0.592961	0.0570091	0.854584
AHSA1	3545466	ILMN_1703617	4880561	0.00203799	0.000686303	0.192136	0.0157109	0.0653139	0.021122	2.94173	0.743815	0.00327869	0.457237	0.0136094	0.783964
AHSA2	2484552	ILMN_1798308	1170220	-0.000161387	0.00160479	-0.0452758	0.0160038	0.0507434	0.014063	-0.89225	1.13801	0.372302	0.255506	0.563597	0.622361
AHSG	2656598	ILMN_1730625	2320377	-0.000111858	0.00152457	-0.0269768	-0.0447549	0.0686597	0.0403507	-0.392906	-1.10915	0.694405	0.267746	0.827491	0.63498
AHSP	3657253	ILMN_1696512	2350274	0.0429666	0.0551699	0.227168	0.0271521	0.0151326	0.00394218	15.0119	6.88759	7.23e-50	1.26e-11	7.26e-47	7.59e-09
AICDA	3443206	ILMN_2164164	6110358	-0.000184902	0.00016886	0.0148647	-0.00873796	0.0530729	0.0236901	0.280081	-0.368844	0.779427	0.712355	0.881638	0.901362
AIF1L	3191877	ILMN_2323508	5420482	-0.000211382	1.84e-08	-0.0236781	0.000161006	0.0809263	0.0418015	-0.292588	0.00385168	0.769849	0.996928	0.874911	0.998502
AIFM1	4021469	ILMN_2313821	1500689	0.00252451	0.000359611	0.206431	-0.0119611	0.0642596	0.0222192	3.21245	-0.538322	0.00132434	0.590525	0.00621671	0.853908
AIG1	2928690	ILMN_1797974	3940056	0.000372464	0.00151293	0.086505	-0.0286562	0.0438146	0.0259356	1.97434	-1.1049	0.0483971	0.269581	0.126548	0.636593
AIM1L	2402645	ILMN_1776916	610397	0.000442255	0.00037226	-0.146254	0.0224598	0.0742842	0.0410065	-1.96884	0.547712	0.0490263	0.584063	0.127872	0.851127
AIM2	2439554	ILMN_2214232	130753	0.000569839	0.00656587	-0.063774	0.0792924	0.0259011	0.0343486	-2.46221	2.30846	0.0138416	0.0212629	0.0459481	0.158452
AIMP1	2738466	ILMN_1715351	3710632	0.000262037	0.00952621	-0.0746325	0.105572	0.0572847	0.0379026	-1.30283	2.78535	0.192691	0.00549097	0.360491	0.0641767
AIMP2	2988882	ILMN_1673252	6960056	0.0102388	0.0239358	0.385381	-0.0942881	0.0520593	0.0211767	7.40272	-4.45245	1.55e-13	9.87e-06	4.39e-12	0.0004935
AIP	3337137	ILMN_2103841	610689	0.00534213	0.00611	-0.259854	-0.0479581	0.0541941	0.0215417	-4.79488	-2.22629	1.67e-06	0.0263107	1.52e-05	0.181361
AIRE	3923608	ILMN_1791236	5820689	-2.48e-05	0.00241185	-0.243356	-0.0380917	0.123081	0.0272909	-1.9772	-1.39576	0.0480729	0.163226	0.125821	0.496811
AJAP1	2317686	ILMN_1723521	1300647	8.34e-05	0.00462062	0.0604416	-0.0699577	0.0712464	0.0361656	0.848346	-1.93437	0.396286	0.0534687	0.58618	0.276285
AJUBA	3556990	ILMN_1687275	2000167	-0.000134218	0.00219838	-0.0268756	0.0332814	0.0761552	0.0249785	-0.352905	1.3324	0.724174	0.183159	0.846227	0.526307
AK2	2405364	ILMN_1655645	3140441	-0.000168136	0.00130343	0.0131275	-0.027084	0.0424786	0.0264123	0.309037	-1.02543	0.757306	0.305514	0.867612	0.668656
AK3	3197318	ILMN_1778173	670463	-0.000198729	6.82e-05	-0.000186203	0.00458831	0.037975	0.0195795	-0.00490331	0.234342	0.996088	0.814788	0.998491	0.943883
AK4	2340315	ILMN_2338038	160148	5.45e-05	0.000521063	-0.0351645	-0.0185117	0.0480142	0.028565	-0.732377	-0.648054	0.463972	0.517161	0.646044	0.814909
AK7	3550343	ILMN_1684305	2760470	0.000126517	0.000137035	0.0860779	-0.0137094	0.082258	0.0412603	1.04644	-0.332267	0.295409	0.739787	0.481388	0.914401
AK8	3228279	ILMN_1659914	6330358	0.000259359	0.000565124	-0.104902	-0.0184832	0.0774553	0.027386	-1.35436	-0.674915	0.175682	0.499952	0.337312	0.806226
AKAP10	3749086	ILMN_1718808	460020	0.00219752	0.000158447	0.238953	-0.00628665	0.0688514	0.0175955	3.47056	-0.357288	0.000523729	0.720984	0.00276553	0.905624
AKAP11	3487220	ILMN_1693220	6420398	0.00944044	0.00433885	-0.445091	0.037506	0.0639818	0.0200122	-6.95653	1.87416	3.93e-12	0.0613233	9.25e-11	0.299775
AKAP12	2931569	ILMN_1686846	6900706	0.0269416	0.00084617	-0.708627	-0.0212254	0.0596685	0.0256969	-11.8761	-0.825992	4.21e-32	0.409089	8.05e-30	0.753525
AKAP14	3989006	ILMN_1802537	3850102	-0.000176916	0.0013296	-0.0481046	-0.0391316	0.0524978	0.0377833	-0.916315	-1.03569	0.359545	0.300705	0.550511	0.664009
AKAP3	3441280	ILMN_1808905	4860088	9.23e-05	0.000817624	-0.071491	0.0229774	0.0648207	0.0282998	-1.1029	0.811927	0.270122	0.417108	0.453783	0.758406
AKAP4	4008170	ILMN_2253207	5560450	0.0002965	0.000136256	-0.078101	0.0130018	0.0546871	0.0392425	-1.42814	0.33132	0.153312	0.740501	0.306091	0.914401
AKAP6	3531553	ILMN_1770758	1510224	0.000457986	0.000281792	-0.0460811	-0.0195254	0.0288295	0.040976	-1.5984	-0.476509	0.110016	0.63386	0.238437	0.872152
AKAP7	2925724	ILMN_1733690	5340504	-0.000199107	0.00858008	0.00409379	0.0410449	0.0352467	0.0155357	0.116147	2.64197	0.907541	0.0084259	0.953938	0.0861903
AKAP8	3853299	ILMN_1741572	6550053	-0.000213761	0.00417037	0.0168126	-0.0399189	0.0878162	0.0217278	0.191452	-1.83723	0.848179	0.0665975	0.920996	0.315058
AKAP8L	3853345	ILMN_1768962	5340593	-5.32e-05	0.000615785	-0.0439326	-0.0130934	0.0803208	0.0185844	-0.546964	-0.704538	0.584428	0.481331	0.74932	0.796854
AKIRIN1	2331158	ILMN_1679383	1260544	0.00519355	5.66e-05	0.277624	0.00568228	0.0580153	0.0266211	4.78535	0.213451	1.76e-06	0.831037	1.59e-05	0.950803
AKIRIN2	2963784	ILMN_2148847	5690202	0.00269749	0.0121848	-0.210991	-0.0585236	0.0552396	0.0185495	-3.81957	-3.15499	0.000135289	0.00167345	0.000819213	0.0273239
AKR1A1	2334374	ILMN_2380771	6130424	0.000399296	0.000977285	-0.0576349	-0.0170473	0.0335957	0.0192029	-1.71554	-0.887749	0.086307	0.374979	0.198381	0.729041
AKR1B1	3073981	ILMN_1701731	4260139	-0.000162426	0.00616967	-0.0178606	-0.049227	0.0423949	0.0220037	-0.421291	-2.23722	0.67356	0.0255848	0.813972	0.178619
AKR1B10	3025433	ILMN_1672148	5310646	0.000108151	0.00193409	-0.0530006	0.0538103	0.0421002	0.0430634	-1.25892	1.24956	0.208119	0.211876	0.381362	0.565348
AKR1C4	3233119	ILMN_1668880	2650736	-6.49e-05	4.92e-05	0.0295032	0.00758755	0.0511453	0.0380936	0.576851	0.199182	0.564066	0.842178	0.732829	0.95242
AKR1C6P	3274716	ILMN_2290896	2640121	-0.000166562	0.000779851	0.00905179	0.0209535	0.0312747	0.0264254	0.289429	0.792933	0.772265	0.428084	0.876087	0.765253
AKR1E2	3232944	ILMN_1694985	5720372	0.0021652	1.08e-06	0.0854866	0.000958224	0.0222149	0.0324874	3.84817	0.0294953	0.000120474	0.976478	0.000735418	0.992564
AKR7A2	2399718	ILMN_1677043	6180681	-9.21e-05	0.0116741	0.038006	-0.0573929	0.0600324	0.0185902	0.633092	-3.08726	0.526703	0.00209956	0.703321	0.0320968
AKR7A3	2399743	ILMN_1718483	270300	0.0015228	0.00355108	0.170664	0.0492841	0.0600421	0.0290807	2.84241	1.69474	0.00449541	0.0905685	0.0177373	0.370372
AKR7L	2399687	ILMN_1702696	4180161	-0.000112483	0.000801051	0.0196867	-0.0248139	0.032799	0.0308765	0.600222	-0.803648	0.548386	0.421872	0.721001	0.761239
AKT1	3581132	ILMN_2388507	2470619	0.0210668	0.0434693	-0.734824	-0.104469	0.0777384	0.0172094	-9.45252	-6.07046	4.93e-21	2.09e-09	3.54e-19	5.04e-07
AKT1S1	3868160	ILMN_1726906	3870092	-6.86e-05	0.00205241	-0.0604192	0.0279757	0.0692244	0.021732	-0.872802	1.2873	0.382812	0.198413	0.57348	0.545557
AKTIP	3691967	ILMN_1665982	5720703	-4.19e-05	0.0032482	-0.0206786	-0.0293242	0.0281475	0.018095	-0.734653	-1.62057	0.462585	0.105558	0.644932	0.399115
ALAD	3221395	ILMN_1747577	3120162	0.00244823	0.000123183	0.261929	-0.00741688	0.074894	0.023544	3.49734	-0.315023	0.000473981	0.752838	0.00253056	0.919983
ALAS1	2623515	ILMN_1728309	7150014	0.00177663	0.000789298	0.198673	0.0306441	0.0659533	0.0384143	3.01233	0.797725	0.00260535	0.425299	0.0111328	0.763422
ALAS2	4009849	ILMN_1708323	1230376	0.0775308	0.0515464	0.34843	0.0273424	0.0173077	0.00411606	20.1315	6.64287	9.23e-87	6.16e-11	1.11e-82	2.85e-08
ALB	2731192	ILMN_1782939	650431	-0.000174522	1.97e-06	0.0295004	0.00108875	0.0747063	0.0273227	0.394884	0.0398477	0.692945	0.968226	0.826568	0.989866
ALDH16A1	3838522	ILMN_2051381	940441	0.000107058	0.00866181	-0.141115	-0.0603279	0.133301	0.0227254	-1.05862	-2.65465	0.289824	0.00811879	0.476321	0.0838316
ALDH1A1	3209726	ILMN_1709348	6510754	0.00547523	0.0074469	-0.174553	-0.0296193	0.0344431	0.0120418	-5.06786	-2.45972	4.17e-07	0.0141443	4.27e-06	0.121482
ALDH1A2	3626312	ILMN_1748538	510687	0.000953922	0.00156253	-0.169473	0.0265141	0.0690434	0.0236122	-2.45458	1.1229	0.0141383	0.261865	0.0467081	0.62808
ALDH1A3	3611625	ILMN_1807439	2360551	0.000957342	0.00194932	-0.23383	0.0350002	0.0892778	0.0279002	-2.61913	1.25448	0.00884173	0.210085	0.0315009	0.562937
ALDH2	3432090	ILMN_1793859	840253	0.00224909	0.00280819	0.23066	-0.0196745	0.0619822	0.0130604	3.7214	-1.50643	0.000200282	0.132406	0.00116985	0.449205
ALDH3A2	3714068	ILMN_2401641	3120196	0.00108119	8.61e-05	0.168674	-0.00539987	0.0670369	0.020501	2.51613	-0.263395	0.0118959	0.792323	0.0406654	0.933874
ALDH5A1	2898499	ILMN_2372403	2640274	0.0224196	0.0228782	0.447594	0.0656742	0.0424428	0.0150966	10.5458	4.35026	9.82e-26	1.56e-05	1.11e-23	0.000704045
ALDH6A1	3571727	ILMN_1785284	5820373	0.0110195	0.00185735	0.361622	-0.0273346	0.0499734	0.0223237	7.23629	-1.22446	5.3e-13	0.221187	1.4e-11	0.576241
ALDH7A1	2873785	ILMN_1687508	70102	-7.1e-05	7.02e-05	0.0200292	0.00845478	0.0220227	0.0355632	0.909481	0.23774	0.36314	0.812152	0.553973	0.942998
ALDH8A1	2975257	ILMN_2365176	2100546	0.000333857	0.0004063	0.121592	-0.0136799	0.0732367	0.0239069	1.66027	-0.572217	0.0969233	0.567358	0.216483	0.843898
ALDOB	3218077	ILMN_1747716	650427	0.00108348	0.000260716	-0.157348	0.00724503	0.068738	0.0158072	-2.2891	0.458337	0.0221149	0.646852	0.0675015	0.875991
ALDOC	3750767	ILMN_1755974	7330544	-0.000224355	0.0181256	0.0111367	-0.0609896	0.0526542	0.0157949	0.211506	-3.86135	0.832501	0.000123161	0.913046	0.00367435
ALG1	3646542	ILMN_1718093	5560670	0.000215385	0.00259801	-0.0561044	-0.0451813	0.0457914	0.0311856	-1.22522	-1.44879	0.22055	0.147843	0.396886	0.473853
ALG12	3965393	ILMN_1743995	6940735	0.000164396	0.00215225	-0.133969	-0.0339397	0.11184	0.0257448	-1.19786	-1.31831	0.231026	0.187828	0.408851	0.533097
ALG13	3987492	ILMN_1724341	2230215	0.00158903	0.00336447	0.146034	-0.034701	0.0556332	0.0210382	2.62495	-1.64943	0.00869242	0.0995067	0.0310444	0.388044
ALG14	2424148	ILMN_1743635	50128	0.00155096	0.00795965	-0.121174	0.0693768	0.0371865	0.0272735	-3.25855	2.54374	0.00112725	0.0111802	0.0053902	0.103871
ALG1L	2693332	ILMN_1782084	2900681	0.000547475	5.62e-05	0.0334534	0.00651544	0.0194061	0.0306203	1.72386	0.212781	0.0847944	0.831559	0.196155	0.950869
ALG2	3217487	ILMN_1722688	4540025	0.000304176	0.00900867	-0.127947	-0.0833675	0.0731301	0.0307877	-1.74958	-2.70782	0.0802519	0.00693727	0.188176	0.075446
ALG5	3509885	ILMN_1664449	6370113	0.000431443	0.00338525	-0.0892059	0.0322341	0.0577248	0.0194823	-1.54536	1.65454	0.122321	0.0984652	0.258183	0.38573
ALG6	2339682	ILMN_1771411	6960243	0.0147094	0.000288635	-0.407218	-0.00915332	0.0486896	0.01898	-8.36355	-0.482262	7.79e-17	0.62977	3.25e-15	0.870807
ALG8	3383164	ILMN_2271014	3610291	-5.15e-05	0.00139818	-0.0708453	-0.030608	0.0506068	0.0288183	-1.39992	-1.0621	0.1616	0.288553	0.318183	0.652848
ALK	2546409	ILMN_1753135	630368	0.000785793	5.45e-05	0.25007	0.00547964	0.12375	0.0261475	2.02076	0.209567	0.0433569	0.834067	0.116152	0.951346
ALKBH1	3573229	ILMN_2375973	7160167	0.00294589	0.000208854	0.164699	-0.010669	0.04773	0.0260084	3.45063	-0.410214	0.000563859	0.681774	0.002949	0.891426
ALKBH2	3470689	ILMN_1690252	1340537	-0.000220136	4.95e-05	-0.0176156	-0.00542734	0.0500823	0.0271713	-0.351732	-0.199745	0.725054	0.841738	0.846763	0.952315
ALKBH3	3328214	ILMN_2134062	4610369	-9.14e-05	3.67e-06	0.0625309	-0.00113318	0.0568499	0.0208371	1.09993	-0.0543829	0.271415	0.956646	0.455572	0.985937
ALKBH4	3065007	ILMN_1805673	1780379	0.00221386	8.46e-06	-0.208665	0.00242029	0.0639403	0.0293228	-3.26344	0.0825396	0.00110801	0.934241	0.00531932	0.980735
ALKBH5	3713093	ILMN_1657283	1400209	-0.000195686	0.0105854	-0.0199709	-0.057608	0.0931829	0.0196085	-0.214319	-2.93792	0.830307	0.00341239	0.911801	0.0459434
ALKBH7	3818395	ILMN_1761764	3310324	0.00127743	0.00134663	-0.131286	-0.0199112	0.053575	0.0191029	-2.45051	-1.04231	0.0142992	0.297627	0.0471552	0.661437
ALKBH8	3389878	ILMN_1779190	6420044	0.00465777	0.00251832	-0.233848	0.0337642	0.0457477	0.0236721	-5.11169	1.42633	3.31e-07	0.154217	3.47e-06	0.482879
ALLC	2467249	ILMN_1681046	4070601	-0.000197738	5.14e-05	-0.0073485	-0.00739692	0.0712408	0.0363582	-0.10315	-0.203446	0.917848	0.838846	0.960075	0.952315
ALMS1	2488785	ILMN_1709474	5130736	0.00155308	0.000289601	0.203102	0.0123493	0.0664253	0.0255644	3.0576	0.483068	0.00224288	0.629198	0.0097994	0.870574
ALMS1P	2488898	ILMN_1774369	4250400	0.000317041	0.000290379	0.10271	0.0126604	0.0695258	0.0261732	1.47729	0.483717	0.13966	0.628737	0.285625	0.870574
ALOX12	3708160	ILMN_1713731	6040259	-0.000197542	0.00303226	-0.00589231	0.0217677	0.0275524	0.0139039	-0.213859	1.56558	0.830666	0.117897	0.91203	0.421685
ALOX12B	3744072	ILMN_1692332	7510671	0.000491835	0.000452126	-0.175013	-0.0235265	0.101177	0.0389743	-1.72976	-0.603641	0.0837335	0.546277	0.194523	0.830932
ALOX15	3742212	ILMN_1729320	1450719	-3.17e-06	0.00128372	0.0352776	-0.0290063	0.0394154	0.0285037	0.895022	-1.01763	0.370818	0.309203	0.562058	0.672544
ALOX15B	3709417	ILMN_2276904	430152	0.00137634	0.000562304	-0.311543	0.0269895	0.113586	0.0400897	-2.7428	0.673228	0.00611323	0.501024	0.022927	0.806915
ALOX5	3244622	ILMN_1792150	2510037	0.000265487	2.28e-06	0.0971186	0.000980841	0.0625642	0.0228665	1.5523	0.0428941	0.120652	0.965798	0.255736	0.989866
ALOX5AP	3484060	ILMN_1797875	3930343	0.0167543	0.0342855	-0.407489	-0.0630321	0.0443926	0.0117562	-9.1792	-5.3616	6.2e-20	1.12e-07	3.95e-18	1.34e-05
ALPI	2532314	ILMN_1752669	2570162	-0.000225698	0.000891321	-0.0185381	0.0235688	0.0848902	0.0278011	-0.218377	0.847765	0.827144	0.396858	0.91002	0.746208
ALPK2	3810133	ILMN_1811238	5270519	-0.000101014	0.000103553	0.0678606	0.00898425	0.0827832	0.0311056	0.819739	0.28883	0.412404	0.772796	0.600249	0.92712
ALPK3	3605884	ILMN_1734630	5810017	-0.000101287	0.000325496	-0.082121	-0.0136692	0.13895	0.0266904	-0.591011	-0.512142	0.554539	0.608713	0.724986	0.861379
ALPP	2532272	ILMN_1693789	2600133	-0.000182561	0.0298447	-0.00371892	-0.062751	0.0339525	0.0125775	-0.109533	-4.98914	0.912784	7.65e-07	0.957309	6.4e-05
ALS2CL	2672230	ILMN_1702322	4570630	-0.000167222	0.000464296	-0.053484	-0.0225765	0.12632	0.0369068	-0.423402	-0.611715	0.67202	0.540924	0.813276	0.829346
ALS2CR11	2594905	ILMN_1792449	1450431	-6.41e-05	0.00123596	0.0648711	0.0378048	0.0871016	0.0378618	0.744775	0.998495	0.456442	0.318383	0.639773	0.681891
ALS2CR12	2594773	ILMN_1765674	2100626	0.00404764	0.00136154	0.173939	0.0263116	0.0339322	0.0251047	5.12609	1.04807	3.07e-07	0.294965	3.23e-06	0.659328
ALX1	3424785	ILMN_1724540	4210719	-0.00016995	0.000227403	-0.0107649	-0.0126567	0.0490209	0.0295684	-0.219597	-0.428047	0.826194	0.668748	0.909927	0.886355
ALX3	2427342	ILMN_2191902	3520619	0.000509922	0.00144183	-0.175638	-0.0435027	0.093178	0.0403332	-1.88497	-1.07858	0.0594907	0.281144	0.149253	0.646497
ALX4	3370869	ILMN_1803384	4230358	0.00184363	0.00269888	-0.281688	-0.0483762	0.0865566	0.032759	-3.25437	-1.47673	0.00114392	0.140196	0.00546343	0.463314
ALYREF	3774331	ILMN_1750518	460286	-0.000186791	0.0121558	0.00274783	-0.0504437	0.0327914	0.0160078	0.0837974	-3.15119	0.933221	0.00169507	0.970176	0.0275649
AMACR	2852742	ILMN_1792741	5870286	0.000292301	0.000584573	-0.0903236	0.0162936	0.0683134	0.0237365	-1.32219	0.686438	0.186163	0.492663	0.351554	0.804307
AMBN	4047460	ILMN_1697611	6450037	-0.000173104	0.000889102	-0.0181707	0.0221992	0.0443536	0.0262183	-0.409678	0.846708	0.68206	0.397446	0.82036	0.74649
AMBP	3221800	ILMN_1695446	4900433	-7.12e-05	0.000596597	-0.048391	-0.0254673	0.0807645	0.0367246	-0.599162	-0.693467	0.549092	0.488246	0.72124	0.801071
AMBRA1	3371544	ILMN_1662681	1110129	0.000924414	0.00121289	0.217522	-0.0270813	0.0958758	0.0273792	2.26879	-0.989121	0.0233229	0.322944	0.0704188	0.685844
AMD1	2921296	ILMN_1788462	50050	0.00750725	0.00032082	-0.358602	0.00753107	0.0622649	0.0148119	-5.7593	0.508449	8.95e-09	0.611298	1.23e-07	0.862243
AMDHD1	3427032	ILMN_1788239	6520112	0.000316578	0.000299194	-0.120579	-0.014956	0.0700412	0.0304598	-1.72155	-0.491007	0.0852125	0.623575	0.196858	0.867851
AMDHD2	3644932	ILMN_1695759	6110280	0.0146274	0.00213729	-0.789519	-0.0253904	0.0948219	0.0193272	-8.32633	-1.31371	1.06e-16	0.189371	4.33e-15	0.534158
AMELX	3968748	ILMN_2397406	5720730	0.00052482	0.00243704	-0.0754597	-0.0393689	0.0439113	0.0280594	-1.71846	-1.40306	0.0857746	0.161041	0.197626	0.493502
AMELY	4033748	ILMN_1727258	7040402	-6.41e-05	0.00105427	0.0349082	0.0291229	0.0443144	0.0315834	0.787739	0.922095	0.430886	0.356795	0.616941	0.715134
AMER2	3506093	ILMN_2394362	2760291	0.000194118	4.15e-05	-0.0945528	0.0048874	0.0787725	0.0267256	-1.20033	0.182873	0.230069	0.85495	0.407636	0.955052
AMFR	3692856	ILMN_1666258	4610594	0.0107982	2.1e-05	0.399428	0.00338777	0.0580143	0.0260244	6.885	0.130177	6.48e-12	0.896464	1.46e-10	0.967089
AMIGO3	2674646	ILMN_1738233	3060349	4.42e-05	0.000135576	-0.0649457	-0.010235	0.0557716	0.0309689	-1.1645	-0.330492	0.244278	0.741127	0.424633	0.914846
AMMECR1	4017961	ILMN_1779374	2340601	-6.01e-05	1.89e-05	-0.0518164	-0.0029527	0.0838459	0.0239149	-0.617995	-0.123467	0.536606	0.901773	0.7112	0.969345
AMMECR1L	2575161	ILMN_1727023	4900605	0.0025004	6.44e-05	0.215056	-0.00559909	0.0617349	0.0245731	3.48354	-0.227855	0.000499026	0.819825	0.00264668	0.946254
AMN1	3449910	ILMN_1750880	6900044	0.00952405	9.24e-05	-0.321849	-0.00663551	0.0485046	0.0243184	-6.63544	-0.272859	3.58e-11	0.785041	7.22e-10	0.931072
AMPD1	2429235	ILMN_1759312	6660114	-2.55e-05	0.00222223	-0.056497	-0.0538856	0.0811657	0.0402242	-0.69607	-1.33963	0.486417	0.180799	0.665832	0.522452
AMTN	2730465	ILMN_1713927	7320450	-8.79e-05	3.58e-05	-0.0312638	-0.00678713	0.035109	0.0399579	-0.890479	-0.169857	0.373251	0.865171	0.564106	0.958176
AMY2B	2349402	ILMN_2073157	7000754	0.00133598	0.000664554	-0.0722427	-0.0136723	0.0324025	0.01868	-2.22954	-0.731926	0.0258217	0.464458	0.0765628	0.788381
AMZ2P1	3767280	ILMN_1756918	5820286	-3.92e-05	0.00212903	-0.0475994	0.0402514	0.0455543	0.0306989	-1.0449	1.31117	0.296121	0.19023	0.482067	0.535564
ANAPC10	2788143	ILMN_1770378	6840706	0.000611939	0.00483088	-0.0523406	0.0444892	0.0279525	0.0224906	-1.87249	1.97813	0.0611973	0.0483041	0.152645	0.261701
ANAPC11	3738280	ILMN_2343563	10220	0.00329497	0.000120972	-0.103441	-0.00744132	0.0238858	0.0238364	-4.33066	-0.312183	1.52e-05	0.754994	0.000112034	0.920763
ANAPC13	2696379	ILMN_1793894	6250382	0.0025123	0.000685304	-0.143725	-0.0120791	0.0392529	0.0162512	-3.66152	-0.743274	0.000253291	0.457564	0.00144174	0.784086
ANAPC15	3380996	ILMN_1726104	6840100	0.00111112	0.000524303	-0.11969	0.0139825	0.0502133	0.0215094	-2.38363	0.650067	0.0171797	0.515861	0.0548095	0.814296
ANAPC16	3251353	ILMN_1738955	7210300	0.00163568	0.00658783	0.177759	0.0412977	0.0556599	0.0178597	3.19366	2.31235	0.00141347	0.0210466	0.00657616	0.158013
ANAPC2	3230894	ILMN_1813243	4180634	-0.000208156	0.00349964	-0.0162033	-0.0438347	0.0437003	0.0260554	-0.370782	-1.68237	0.710815	0.0929419	0.838531	0.375696
ANAPC4	2721848	ILMN_1802973	6450021	0.00137621	6.73e-05	-0.107485	0.00369433	0.0401322	0.0158651	-2.67829	0.232858	0.00742401	0.815939	0.0271747	0.944574
ANGEL1	3572782	ILMN_1665871	5550086	0.000287989	0.00155147	0.124971	-0.0260178	0.0780504	0.0232528	1.60115	-1.11891	0.109406	0.263561	0.237368	0.629512
ANGEL2	2454935	ILMN_1736340	1820441	0.0050403	4.44e-05	-0.320773	-0.00351069	0.0641372	0.0185613	-5.00136	-0.18914	5.89e-07	0.850037	5.87e-06	0.954411
ANGPT4	3894413	ILMN_1758443	6040343	0.000622676	0.000334097	-0.179833	-0.0217101	0.0816508	0.0418415	-2.20247	-0.518867	0.0276773	0.604017	0.08091	0.860026
ANGPTL1	2445982	ILMN_2145501	2030450	0.00296391	0.00541561	-0.12958	0.0867418	0.0346926	0.0414016	-3.73509	2.09513	0.00018972	0.0365164	0.00111301	0.222895
ANGPTL2	3225855	ILMN_1772612	7650672	0.000159903	0.00148453	0.0930287	0.0416469	0.0605389	0.0380524	1.53668	1.09446	0.124436	0.274127	0.261547	0.640284
ANGPTL3	2339454	ILMN_1695193	1050561	0.0012318	0.00196525	-0.152809	-0.0397715	0.0612596	0.0315746	-2.49445	-1.25961	0.0126471	0.20823	0.0427002	0.560208
ANGPTL4	3819474	ILMN_1674376	990092	-0.000101011	2.52e-05	0.0756875	-0.00408519	0.0919661	0.0286465	0.822994	-0.142607	0.41055	0.886642	0.598953	0.965187
ANGPTL5	3388517	ILMN_2166696	2360066	-0.00017407	1.25e-05	-0.0146976	-0.00294197	0.0744949	0.0293131	-0.197297	-0.100364	0.843603	0.920084	0.9187	0.977072
ANGPTL6	3850020	ILMN_1725518	5050707	0.000881724	0.00230168	-0.206785	-0.0389968	0.0812969	0.028602	-2.54358	-1.36343	0.0110019	0.173184	0.0379647	0.512095
ANGPTL7	2320188	ILMN_1813361	2640348	0.00141244	0.00196055	0.125352	-0.0524006	0.049206	0.0416507	2.54749	-1.25809	0.0108795	0.208775	0.0376071	0.560798
ANK1	3132940	ILMN_2317186	2900402	0.0482956	1.31e-05	0.538759	-0.00409388	0.0344066	0.0398403	15.6586	-0.102757	5.33e-54	0.918185	6.42e-51	0.976706
ANKDD1A	3598199	ILMN_1813139	5890564	0.000437744	2.94e-05	0.12798	-0.00134442	0.0755622	0.00873302	1.6937	-0.153947	0.0903835	0.877696	0.205432	0.963034
ANKEF1	3876142	ILMN_2367300	7100433	0.00371782	0.00140259	0.204048	-0.030431	0.0471018	0.0286066	4.33207	-1.06378	1.51e-05	0.287795	0.00011139	0.651744
ANKFN1	3727787	ILMN_1811239	6590152	-0.000201651	0.000223408	-0.00256745	-0.0175188	0.0818144	0.0412917	-0.0313813	-0.424269	0.974967	0.671499	0.989001	0.887155
ANKH	2849469	ILMN_1692080	5130274	0.0278611	0.0240434	0.492099	0.109836	0.0395749	0.0246118	12.4346	4.46273	5.5e-35	9.42e-06	1.35e-32	0.000478949
ANKK1	3349535	ILMN_1797873	780338	0.00101349	0.00229891	-0.196256	0.0453824	0.0811633	0.0333056	-2.41804	1.36261	0.0156395	0.173443	0.0507283	0.51243
ANKMY2	3039731	ILMN_1784292	4890136	2.24e-05	1.97e-05	0.0709358	0.00248217	0.0545169	0.0196926	1.30117	0.126045	0.19326	0.899732	0.361331	0.968298
ANKRA2	2862380	ILMN_2185563	7400114	0.00132795	0.00013472	-0.15647	-0.00584817	0.0559723	0.0177515	-2.7955	-0.329447	0.00520161	0.741916	0.0200298	0.915242
ANKRD1	3299970	ILMN_1716264	6560112	0.000329384	0.000280029	0.0960108	0.0112288	0.0587828	0.0236388	1.63331	0.475015	0.102465	0.634923	0.225954	0.872784
ANKRD13A	3431376	ILMN_1689908	2120224	0.000379322	0.00483556	0.103648	-0.0382114	0.0726815	0.0193076	1.42605	-1.97909	0.153915	0.0481953	0.307115	0.261483
ANKRD13B	3716151	ILMN_1794070	5910273	-0.000221068	0.000503115	-0.0245155	0.0175361	0.102469	0.0275383	-0.239248	0.636789	0.810923	0.52447	0.901524	0.819909
ANKRD13D	3336857	ILMN_1662902	4060451	0.0110336	0.00143754	-0.562423	0.0392989	0.0791175	0.0364902	-7.10871	1.07697	1.33e-12	0.281862	3.32e-11	0.647241
ANKRD16	3275611	ILMN_2353431	3450274	-5.87e-05	0.00146896	0.039759	0.0277114	0.0539405	0.0254537	0.737091	1.0887	0.461101	0.27666	0.643757	0.642961
ANKRD18DP	2713709	ILMN_1681751	6040619	-0.000223503	0.00239463	-0.00690237	0.048304	0.0430316	0.0347321	-0.160402	1.39076	0.872571	0.164738	0.933647	0.498642
ANKRD2	3259920	ILMN_1682547	840333	-5.12e-05	0.00117959	-0.0505619	0.0256822	0.0994299	0.0263291	-0.508518	0.97543	0.611112	0.329682	0.768222	0.691381
ANKRD20A11P	3925295	ILMN_1767805	290762	-0.000106312	7.07e-06	0.0207673	0.00124192	0.0266591	0.0164582	0.778994	0.075459	0.43602	0.939871	0.622074	0.982074
ANKRD22	3299469	ILMN_2132599	4150270	-0.000176808	0.000762132	-0.00583074	0.0100978	0.0199456	0.0128821	-0.292332	0.783865	0.770045	0.433383	0.874968	0.769497
ANKRD23	2565559	ILMN_2227338	1300634	-4.22e-05	0.000264833	-0.0797979	-0.0122737	0.0839336	0.0265698	-0.950726	-0.461943	0.341789	0.644265	0.53177	0.875205
ANKRD26	3282117	ILMN_1740161	5720162	0.000156564	5.87e-05	-0.0591021	-0.00722058	0.0528365	0.0332082	-1.11858	-0.217434	0.263371	0.827933	0.446423	0.950099
ANKRD26P1	3689827	ILMN_1741157	2350682	0.000633163	7.12e-06	-0.218251	-0.00326572	0.0989376	0.043132	-2.20595	-0.0757145	0.0274324	0.939668	0.0803696	0.982074
ANKRD27	3858659	ILMN_1794063	5670112	0.00132211	0.000145795	0.0999091	-0.00772707	0.0406812	0.022546	2.4559	-0.342724	0.0140866	0.731908	0.0465945	0.910864
ANKRD29	3801492	ILMN_2075643	1500358	-0.00018171	0.00135235	-0.0120636	0.0424326	0.08002	0.0406239	-0.150758	1.04452	0.880173	0.296602	0.937781	0.660883
ANKRD30A	3242839	ILMN_1796059	5910309	-2.84e-05	0.000177645	0.0644488	-0.0154062	0.0608102	0.040723	1.05983	-0.378318	0.28927	0.705309	0.475865	0.900283
ANKRD30BL	2576788	ILMN_1749341	840762	-0.000175546	0.004398	-0.0068214	0.0499904	0.0204692	0.0264927	-0.333253	1.88695	0.738958	0.0595785	0.855574	0.294471
ANKRD32	2820622	ILMN_2214278	1070736	-0.000158468	6.15e-06	-0.0232999	0.00136402	0.0428611	0.0193821	-0.543614	0.0703753	0.586731	0.943915	0.75142	0.98299
ANKRD35	2356273	ILMN_2145153	4180437	0.000306015	0.00210174	0.153784	0.0202055	0.0866273	0.0155103	1.77523	1.30272	0.07592	0.193099	0.180405	0.53835
ANKRD36B	2565935	ILMN_1780806	3060010	-0.000208592	0.000153337	-0.00135239	-0.0053355	0.0105199	0.0151802	-0.128555	-0.351478	0.897715	0.725335	0.947588	0.907799
ANKRD37	2754673	ILMN_1756417	240682	0.000599723	6.31e-06	0.139851	0.00222127	0.0585306	0.0311648	2.38936	0.0712751	0.0169142	0.943199	0.0540769	0.982888
ANKRD39	2565579	ILMN_1710979	6220553	0.000694154	0.00472532	0.129495	0.0473322	0.0635142	0.024195	2.03884	1.95628	0.041518	0.0508277	0.112436	0.269575
ANKRD42	3342569	ILMN_1676605	2120392	0.000207813	0.000229743	0.0243467	-0.0160041	0.0212138	0.0371977	1.14768	-0.430244	0.251154	0.66715	0.432282	0.885467
ANKRD45	2444415	ILMN_1733716	7610066	0.000423876	0.000252044	-0.0859029	0.0135549	0.0450778	0.0300787	-1.90566	0.450648	0.0567513	0.652382	0.143757	0.87874
ANKRD49	3345107	ILMN_1669259	520341	0.000854951	0.00805802	-0.0732772	0.0340963	0.0327755	0.0133212	-2.23573	2.55956	0.025413	0.0106886	0.0754812	0.10086
ANKRD50	2784687	ILMN_2226304	1770187	-0.000128105	0.000667758	0.0202919	0.0207099	0.0318173	0.0282271	0.637765	0.733689	0.523656	0.463383	0.700212	0.787983
ANKRD53	2487963	ILMN_1772660	150097	-0.000144413	0.00156855	-0.0823503	0.0326969	0.0993603	0.0290623	-0.828805	1.12506	0.407254	0.260947	0.596106	0.627877
ANKRD54	3960246	ILMN_1766309	2340598	-0.000207259	0.000834321	0.0379401	0.0261085	0.0926545	0.0318325	0.409479	0.820183	0.682205	0.41239	0.82036	0.755382
ANKRD55	2857488	ILMN_2341724	4050600	9.5e-05	0.00186221	0.045747	-0.0153118	0.0308796	0.0124885	1.48146	-1.22607	0.138546	0.220583	0.283924	0.57558
ANKRD6	2916825	ILMN_1698159	2030014	-8.95e-05	0.000220826	0.0810622	0.0131131	0.0838884	0.0310877	0.96631	0.42181	0.333935	0.673293	0.522927	0.88773
ANKRD7	3020843	ILMN_2354930	2370672	-1.29e-05	8.59e-06	-0.0662507	-0.00229345	0.0638311	0.02757	-1.03791	-0.0831865	0.299364	0.933727	0.485836	0.980685
ANKS1A	2904329	ILMN_1813669	5390064	0.000514245	0.0166661	-0.180332	-0.0831832	0.0899164	0.0224851	-2.00555	-3.69948	0.0449576	0.000232911	0.119457	0.00603565
ANKS4B	3651672	ILMN_2199658	1110382	-7.47e-05	0.00134459	0.0295806	-0.0283127	0.0464823	0.0271841	0.636384	-1.04152	0.524555	0.297995	0.701152	0.661543
ANKS6	3217395	ILMN_1735108	1050400	0.000208022	0.000175587	0.0643952	0.0121573	0.0551579	0.0323229	1.16747	0.37612	0.243076	0.706941	0.423827	0.900283
ANLN	2997376	ILMN_1739645	6450669	-6.61e-06	0.00208502	0.0455723	0.0491776	0.0629718	0.0379015	0.723695	1.29751	0.469287	0.194881	0.651172	0.540623
ANO10	2671101	ILMN_1767111	7040554	-0.000185482	0.00101552	0.0142456	-0.0235263	0.0459053	0.0259969	0.310325	-0.904967	0.756327	0.365793	0.866936	0.723044
ANO2	3441542	ILMN_1699121	50176	0.00213547	0.000233843	-0.299527	-0.0153551	0.104715	0.035375	-2.86039	-0.434067	0.00424856	0.664373	0.0168769	0.883877
ANO3	3324321	ILMN_2049672	4900768	-1.75e-05	3.86e-06	-0.0950262	0.00199705	0.11241	0.0357925	-0.845356	0.0557953	0.397952	0.955521	0.587779	0.985731
ANO4	3428333	ILMN_1745134	1240609	2.05e-05	0.00315913	-0.189548	0.0445587	0.103133	0.0278821	-1.8379	1.59811	0.0661362	0.110467	0.162178	0.408948
ANO5	3323748	ILMN_1690154	1450593	-2.04e-05	0.00130654	0.0547678	-0.0411492	0.0655696	0.040081	0.835263	-1.02665	0.403609	0.304938	0.59276	0.668381
ANO7	2536217	ILMN_1732948	6280746	-0.000170341	0.00163686	0.145877	-0.0475225	0.13595	0.0413475	1.07302	-1.14934	0.283316	0.250805	0.469148	0.61665
ANP32A	3630912	ILMN_1807945	1240424	0.00101294	0.000339959	-0.0805874	0.00605701	0.0367157	0.0115724	-2.1949	0.523401	0.0282161	0.60086	0.0821067	0.857942
ANP32A-IT1	3630957	ILMN_1686662	1980259	0.000667221	0.00117613	-0.121454	-0.0160083	0.0608866	0.0164357	-1.99476	-0.973997	0.0461232	0.330393	0.121909	0.691856
ANP32B	3181417	ILMN_1684293	3850053	0.0217177	0.0255436	0.388895	0.0849378	0.0385218	0.018449	10.0955	4.60392	9.71e-24	4.92e-06	9.44e-22	0.000279651
ANP32C	2792305	ILMN_2151412	1230725	-0.000180394	0.00124908	-0.00446333	0.0383782	0.0364164	0.0382333	-0.122564	1.00379	0.902457	0.315825	0.95091	0.679245
ANP32D	3413479	ILMN_1728191	4850114	0.00054752	0.000784486	-0.0329708	0.0226589	0.0183818	0.0284915	-1.79366	0.795288	0.0729266	0.426714	0.174967	0.764369
ANPEP	3638607	ILMN_1763837	5810612	0.0041945	0.000866678	-0.180934	-0.00818149	0.0388644	0.00978704	-4.65552	-0.835951	3.31e-06	0.403466	2.84e-05	0.749973
ANTXR1	2487082	ILMN_1670379	20647	-6.84e-05	0.00042307	-0.0687481	0.0229092	0.099047	0.039234	-0.694095	0.583913	0.487654	0.559466	0.66697	0.839862
ANXA1	3174816	ILMN_2184184	6520215	-1.38e-07	0.0313098	0.0543708	0.0397849	0.0427198	0.00777873	1.27273	5.11458	0.203172	4.06e-07	0.374862	3.77e-05
ANXA10	2751009	ILMN_1699421	1050242	0.000976224	0.001481	0.154867	-0.0311315	0.0654056	0.0284785	2.3678	-1.09316	0.0179317	0.274699	0.0567726	0.640295
ANXA11	3297536	ILMN_1685170	5900735	0.00130437	0.0165737	-0.24552	-0.054509	0.0889431	0.0147761	-2.76042	-3.68901	0.00579362	0.000242513	0.0218977	0.00623088
ANXA13	3151719	ILMN_1737612	5080274	0.000214304	0.00141815	0.116906	-0.0312156	0.0777282	0.0291824	1.50403	-1.06967	0.132636	0.285134	0.274615	0.650363
ANXA2	3627248	ILMN_1711899	770730	0.00106083	0.00132611	0.11101	-0.0157685	0.0507645	0.0152452	2.18676	-1.03432	0.028806	0.301341	0.0834606	0.664439
ANXA2P1	2790109	ILMN_1698100	270609	6.95e-05	4e-06	0.0507283	0.000676485	0.0465759	0.0119128	1.08915	0.0567863	0.276139	0.954732	0.46106	0.985731
ANXA2P3	3249171	ILMN_1798372	2810411	0.000114554	2.19e-05	0.0409206	0.00339982	0.034646	0.0255823	1.18111	0.132897	0.237616	0.894313	0.416901	0.966239
ANXA2R	2855434	ILMN_2098616	7330523	0.00514695	9.56e-05	-0.210569	0.00531405	0.0423154	0.0191501	-4.97618	0.277494	6.7e-07	0.781482	6.6e-06	0.930306
ANXA5	2784027	ILMN_1741003	1070451	0.000215413	0.00520188	0.109114	-0.0268558	0.0515993	0.0130805	2.11464	-2.05312	0.0345093	0.0404302	0.0965042	0.237651
ANXA6	2881747	ILMN_2326591	450671	0.0030588	0.000607911	0.237097	-0.0144505	0.0545953	0.0206431	4.34281	-0.700016	1.43e-05	0.484149	0.000107283	0.798426
ANXA7	3294438	ILMN_1703791	6330044	0.0038491	0.0142274	0.283852	-0.0656734	0.0658578	0.0192407	4.31008	-3.41325	1.66e-05	0.000678727	0.000121746	0.0137688
ANXA9	2358591	ILMN_2217601	1260100	0.000449833	1.1e-05	0.139207	0.00382717	0.085104	0.0407041	1.63573	0.0940242	0.101959	0.925117	0.225184	0.977662
AOAH	3046062	ILMN_1709820	2940424	0.000961337	0.000836946	0.115522	-0.0125377	0.0485424	0.0152625	2.37981	-0.821473	0.0173585	0.411655	0.0552044	0.754785
AOC1	3031650	ILMN_1731433	5420440	0.000420144	0.000308959	-0.0999222	-0.0127592	0.0584293	0.0255716	-1.71014	-0.498958	0.0873015	0.617965	0.200263	0.865208
AOC2	3722182	ILMN_2405185	4290180	0.0030199	0.00079043	-0.179652	-0.0247931	0.0488755	0.0310574	-3.6757	-0.798298	0.000239662	0.424967	0.00137064	0.763358
AOC3	3722195	ILMN_1782086	6860309	0.00197448	0.000169443	-0.14963	-0.00841331	0.0461222	0.0227707	-3.24421	-0.36948	0.00118545	0.711881	0.00564558	0.901275
AOX1	2522247	ILMN_1767113	3780095	-0.000141834	0.000316294	0.0619626	-0.0204316	0.120143	0.0404708	0.515742	-0.504848	0.606057	0.613824	0.765031	0.863304
AP1AR	2739755	ILMN_2207562	1450239	0.00326604	0.0023769	-0.212533	0.0418348	0.0529159	0.0301928	-4.01643	1.38559	5.99e-05	0.166312	0.000394296	0.50093
AP1B1	3956781	ILMN_1781983	5960201	-0.000180424	0.00305328	-0.019892	-0.0333366	0.0798353	0.0212198	-0.249163	-1.57102	0.803245	0.116629	0.897044	0.418477
AP1G2	3557614	ILMN_2276598	3130215	0.00060186	0.00019766	0.143601	0.0164903	0.0754409	0.0413222	1.90349	0.399066	0.0570331	0.689965	0.144319	0.894084
AP1M1	3823625	ILMN_1754738	2190241	0.00204703	0.0184276	-0.265422	-0.0616268	0.0790112	0.0158258	-3.3593	-3.89408	0.000787207	0.000107969	0.00395079	0.00333597
AP1M2	3850457	ILMN_1705861	1170041	0.00163229	0.00183255	-0.223667	0.0447205	0.0802364	0.0367694	-2.7876	1.21624	0.00532989	0.2243	0.0204604	0.581001
AP1S1	3016177	ILMN_2316173	7040079	0.000202769	7.67e-07	-0.0953015	-0.000620515	0.0633497	0.0249671	-1.50437	-0.0248533	0.132548	0.980179	0.274575	0.99362
AP1S3	2601287	ILMN_1768610	4480491	-0.000184807	0.000244765	0.016643	0.0113907	0.0433343	0.0256493	0.38406	0.444091	0.70095	0.657113	0.831589	0.881203
AP2B1	3718682	ILMN_1681998	1400605	0.0286158	1.02e-07	0.606714	0.000194341	0.0525184	0.0214408	11.5524	0.00906405	1.73e-30	0.992771	2.98e-28	0.996824
AP2S1	3866302	ILMN_1662426	3120228	0.0217318	0.00800312	0.580792	0.0388384	0.0549423	0.0152263	10.5709	2.55074	7.56e-26	0.0109602	8.59e-24	0.102539
AP3B1	2863730	ILMN_1768867	2230603	0.000981212	0.00882116	-0.167989	-0.0471321	0.0740959	0.0175918	-2.26718	-2.6792	0.0234212	0.00755242	0.0706595	0.0803436
AP3B2	3636216	ILMN_1679256	4230360	-0.000137192	0.00281958	-0.0418764	-0.0425587	0.0902444	0.028194	-0.464033	-1.50949	0.642644	0.131622	0.792698	0.44815
AP3D1	3845708	ILMN_1764945	4210612	-0.000189362	0.0270994	-0.0927629	-0.0906152	0.113405	0.0190913	-0.81798	-4.74642	0.413408	2.51e-06	0.601275	0.000167768
AP3M1	3295032	ILMN_1701774	4540075	0.000623132	0.000191669	0.125243	-0.0121539	0.0685052	0.0309281	1.82822	-0.392971	0.067575	0.69446	0.1647	0.89554
AP3S1	2824872	ILMN_1658911	1980424	0.00380238	5.91e-05	-0.242292	0.00448682	0.0553584	0.0205655	-4.37678	0.218172	1.23e-05	0.827358	9.35e-05	0.949779
AP4M1	3015241	ILMN_1779512	2750168	0.000118887	8.89e-05	-0.0914053	0.00961049	0.100183	0.0359115	-0.912384	0.267616	0.36161	0.789073	0.552455	0.933288
AP5M1	3537557	ILMN_1741331	6220221	0.00824923	6.24e-05	-0.408256	0.00462134	0.0590819	0.0206194	-6.90999	0.224126	5.45e-12	0.822724	1.25e-10	0.947241
AP5S1	3874485	ILMN_1785644	3940059	0.000111106	0.00897147	-0.0799418	-0.0548174	0.0576534	0.0202865	-1.38659	-2.70217	0.165627	0.00705511	0.324153	0.0764515
AP5Z1	2988336	ILMN_2083559	1570685	0.009171	0.000713424	-0.716186	-0.0207392	0.105883	0.0273466	-6.76394	-0.758382	1.5e-11	0.448477	3.22e-10	0.777687
APAF1	3427876	ILMN_1659463	1820324	0.0148473	0.0106714	-0.558712	-0.0427857	0.0659067	0.0145037	-8.47732	-2.94998	2.99e-17	0.00328351	1.35e-15	0.044511
APBA1	3208765	ILMN_2182656	430112	0.000275498	1.07e-09	-0.0990275	3.82e-05	0.0913371	0.0411851	-1.0842	0.00092659	0.278329	0.999261	0.463497	0.999669
APBA3	3846363	ILMN_1686610	4070014	0.000641122	0.0133683	-0.261299	-0.0627673	0.0938148	0.0189804	-2.78527	-3.30695	0.00536831	0.000991159	0.0205814	0.018468
APBB1IP	3239760	ILMN_1801710	1820722	7.9e-05	0.00346712	0.0725669	-0.025961	0.0584877	0.0155037	1.24072	-1.6745	0.214767	0.0944771	0.389633	0.377931
APC	2824198	ILMN_1662668	5720722	0.00233726	0.00120698	-0.243825	0.0294339	0.0681475	0.0298305	-3.5779	0.986703	0.000349615	0.324128	0.0019228	0.686904
APC2	3815888	ILMN_1659950	4180358	0.00182634	0.00159644	-0.379077	0.0377114	0.127543	0.0332248	-2.97214	1.13504	0.00297132	0.256747	0.0124537	0.623049
APCDD1L	3911485	ILMN_1689431	130138	-5.01e-05	0.00930975	-0.0880528	0.0919662	0.0854013	0.0334037	-1.03105	2.75318	0.302568	0.00605432	0.489484	0.0683095
APCS	2362651	ILMN_1708833	3460279	0.000161996	0.000398002	0.0496091	-0.0208203	0.048481	0.0367629	1.02327	-0.566341	0.306229	0.571343	0.492583	0.84556
APEH	2622196	ILMN_1718023	450475	0.00352455	0.00780387	-0.283675	-0.0549407	0.0674656	0.0218149	-4.20473	-2.5185	2.66e-05	0.0120065	0.000187057	0.109191
APEX1	3527493	ILMN_2319344	3120309	0.000622814	0.000378589	-0.110993	0.0118405	0.0568577	0.0214366	-1.95213	0.552351	0.0509783	0.580884	0.13184	0.850091
APEX2	3978620	ILMN_1652505	1430047	-0.00015289	0.0145835	0.0479984	-0.0686118	0.0712644	0.0198505	0.673526	-3.45642	0.500644	0.000580321	0.679288	0.0120567
APH1A	2434341	ILMN_2398388	7550364	0.0145729	0.00442104	-0.457452	-0.0278886	0.0535717	0.0147409	-8.53906	-1.89191	1.77e-17	0.058913	8.17e-16	0.292965
APH1B	3597521	ILMN_1862217	3940762	0.000155626	0.00338627	-0.044298	-0.0377856	0.044743	0.0228341	-0.990053	-1.65479	0.322196	0.0984143	0.509786	0.38573
API5	3327906	ILMN_1815051	7050523	0.00144416	0.00079793	0.122749	0.0141705	0.0474366	0.0176672	2.58765	0.802079	0.0096909	0.422778	0.0340255	0.762331
APIP	3369249	ILMN_1793598	6200202	-0.000211351	0.00375699	-0.00332568	0.033679	0.017484	0.0193182	-0.190213	1.74339	0.84915	0.0817035	0.921327	0.35349
APLNR	3373630	ILMN_1700183	3290402	-0.000109406	1.07e-06	-0.0454527	-0.00080522	0.0552605	0.0274512	-0.822518	-0.0293328	0.410821	0.976607	0.599001	0.992564
APLP1	3830961	ILMN_2396198	3140431	-0.000222645	0.000876044	-0.0277782	0.0291195	0.102328	0.0346471	-0.271464	0.840461	0.786045	0.400936	0.886213	0.748571
APLP2	3356115	ILMN_1710482	3450577	0.00358848	0.00631362	-0.271088	-0.0362447	0.0638089	0.0160137	-4.24843	-2.26335	2.19e-05	0.023918	0.000156911	0.171351
APMAP	3901665	ILMN_1674394	4040204	0.0102065	0.00254544	-0.360389	-0.0192245	0.051255	0.0134061	-7.03129	-1.43401	2.32e-12	0.152014	5.61e-11	0.480847
APOA1	3392986	ILMN_1690884	4570364	-6.62e-05	0.00205285	-0.0394793	0.0308536	0.066913	0.0239652	-0.590009	1.28744	0.555211	0.198366	0.725707	0.545557
APOA1BP	2361584	ILMN_1729533	1570725	0.000730686	0.00799469	0.11027	-0.0518205	0.0490097	0.0203267	2.24996	-2.54939	0.0244945	0.0110025	0.0733313	0.102775
APOA2	2440730	ILMN_1688543	6380020	0.00088834	6.97e-07	0.0993187	-0.000732954	0.0461517	0.0309221	2.15201	-0.0237032	0.0314441	0.981096	0.0895839	0.994022
APOA4	3392973	ILMN_1675706	3780468	-0.00015076	7.17e-06	-0.0098541	-0.00224806	0.0489103	0.0295789	-0.201473	-0.076002	0.840337	0.939439	0.91705	0.982074
APOA5	3392957	ILMN_1754055	1470600	-0.000108156	0.000369522	0.0380386	0.0166031	0.0728101	0.0304256	0.522436	0.545693	0.60139	0.58545	0.761832	0.851444
APOB	2543163	ILMN_1664024	240541	-8.69e-05	0.000173621	0.085343	0.01509	0.110694	0.0403467	0.77098	0.374008	0.440755	0.708511	0.626161	0.900662
APOBEC1	3442752	ILMN_1813881	990438	0.00293437	0.00132201	-0.20837	0.041503	0.0561902	0.0401881	-3.7083	1.03272	0.0002109	0.302091	0.00122593	0.66524
APOBEC2	2906591	ILMN_1719143	3890743	-0.000132068	0.0058259	0.0114327	0.0810388	0.033948	0.0372838	0.336771	2.17356	0.736304	0.030071	0.854024	0.199096
APOBEC3C	3945572	ILMN_1675684	3120221	0.0127746	0.000980906	0.292602	0.0163317	0.0383502	0.0183627	7.62975	0.889394	2.79e-14	0.374095	8.75e-13	0.728714
APOBEC3D	3945585	ILMN_1661572	6350402	0.00304315	0.000380553	0.229104	-0.0168426	0.0615583	0.0304137	3.72173	-0.553782	0.000200014	0.579904	0.00116942	0.849173
APOBEC3F	3945614	ILMN_1710726	6290743	0.00357034	0.0069882	0.165766	-0.0655633	0.0404823	0.027523	4.09477	-2.38213	4.29e-05	0.0174779	0.00029006	0.139292
APOBEC3G	3945651	ILMN_2232478	4120369	5.23e-05	0.000101767	0.04061	0.00372464	0.0424367	0.0130083	0.956954	0.286329	0.338636	0.774711	0.52816	0.928063
APOBEC3H	3945684	ILMN_1664828	160292	0.000801495	0.000353422	0.0597199	-0.0109318	0.0308109	0.0204842	1.93828	-0.533668	0.0526453	0.59374	0.135204	0.855196
APOC1	3835891	ILMN_1789007	3830465	0.000265551	0.00339785	0.0476515	0.0453093	0.0309853	0.0273339	1.53787	1.65762	0.124142	0.0978396	0.261053	0.384307
APOC3	3350655	ILMN_1722070	2630010	9.74e-05	0.000342208	-0.0635663	-0.0167639	0.0576356	0.0319234	-1.1029	-0.52513	0.270123	0.599658	0.453783	0.857773
APOC4	3835911	ILMN_1765605	3440717	2.25e-05	6.25e-08	0.0783755	0.000211804	0.0630815	0.0298453	1.24245	0.00709672	0.214129	0.99434	0.388981	0.997568
APOD	4054204	ILMN_1780170	7150634	0.000571027	0.000412316	-0.052617	-0.0112769	0.0299626	0.0195631	-1.75609	-0.57644	0.0791334	0.564502	0.18621	0.842092
APOE	3835879	ILMN_1740938	730414	-0.000204623	0.00325941	-0.0528883	0.0655371	0.0813519	0.0403709	-0.650117	1.62337	0.515646	0.104958	0.693665	0.397592
APOF	3457794	ILMN_1809311	130400	0.000139129	0.000586342	-0.0399632	0.0252203	0.0391247	0.0366853	-1.02143	0.687477	0.307099	0.492009	0.493596	0.804021
APOH	3767709	ILMN_1761511	1740669	5.78e-05	7.81e-06	-0.0522504	0.00340792	0.0592786	0.0429568	-0.881438	0.0793337	0.378123	0.93679	0.568978	0.981761
APOL1	3944404	ILMN_1688631	6370470	0.000845646	0.00162038	0.0750757	-0.0290605	0.0394904	0.0254129	1.90111	-1.14353	0.0573444	0.253207	0.144833	0.619521
APOL2	3959411	ILMN_2325338	1570358	-3.78e-05	0.00131679	-0.0584073	-0.0234425	0.0561099	0.0227448	-1.04094	-1.03068	0.297951	0.303047	0.484391	0.666008
APOL4	3959388	ILMN_1704682	610661	-0.00019852	0.00144625	0.000259512	0.035912	0.0654086	0.0332446	0.00396755	1.08024	0.996835	0.280408	0.998555	0.645694
APOL5	3944273	ILMN_1676177	6450301	0.00054974	0.000151518	-0.106378	-0.0136241	0.0574407	0.0389943	-1.85196	-0.349387	0.0640905	0.726904	0.158282	0.908522
APOL6	3944243	ILMN_1687201	5550397	0.00341849	0.000629002	0.126306	0.0188581	0.0325229	0.0264837	3.8836	0.712064	0.000104237	0.476662	0.000649793	0.795229
APOLD1	3405515	ILMN_1723522	1770364	-0.000129546	0.00142871	-0.0218155	0.0278168	0.0325885	0.0259085	-0.669424	1.07365	0.503255	0.283346	0.682294	0.64874
APOOL	3983105	ILMN_1777483	4250270	-0.000197223	9.69e-05	0.000627362	-0.00658664	0.0405918	0.0235756	0.0154554	-0.279384	0.987669	0.780033	0.995062	0.930028
APPBP2	3765299	ILMN_2149766	5270333	0.00171907	0.00380354	-0.254668	-0.0344398	0.0723535	0.0196327	-3.51977	-1.7542	0.000435737	0.0798319	0.00234613	0.34784
APPL1	2625606	ILMN_1763730	5860554	0.000277089	0.00583929	0.108511	0.0449621	0.0669135	0.020662	1.62165	2.17608	0.10494	0.0298817	0.230097	0.198498
APRT	3704495	ILMN_1722491	160746	-0.000116756	0.00523163	-0.036546	-0.0326534	0.068233	0.0158587	-0.535606	-2.05902	0.592255	0.0398601	0.755214	0.235333
AQP1	2995589	ILMN_1776857	70338	0.00331062	1.56e-06	0.236214	0.000998794	0.0578002	0.0282179	4.08674	0.0353957	4.44e-05	0.971774	0.000299245	0.990739
AQP10	2360186	ILMN_2090004	2340577	-0.000168912	0.00057274	-0.0142055	0.00647872	0.0660255	0.00953524	-0.215152	0.679451	0.829657	0.497076	0.911254	0.805244
AQP11	3341362	ILMN_1762606	4210072	-0.000205221	0.00355304	-0.0075384	-0.0612709	0.0539035	0.0361436	-0.13985	-1.69521	0.888784	0.0904791	0.942863	0.370372
AQP2	3414296	ILMN_1732149	4480079	-0.000241697	0.00369235	0.0344186	0.0388204	0.0768176	0.0224622	0.448057	1.72826	0.654132	0.0843813	0.801401	0.3598
AQP3	3203569	ILMN_1651574	1050040	0.00103615	7.4e-05	-0.171714	0.00641364	0.0652939	0.026275	-2.62986	0.244097	0.008568	0.807227	0.0306636	0.940815
AQP4	3802396	ILMN_1747683	2750176	0.000523724	0.000515923	-0.131823	0.0256368	0.0737891	0.0397564	-1.78648	0.644848	0.074082	0.519236	0.177121	0.816403
AQP4-AS1	3782853	ILMN_1705656	2030647	-0.000194621	0.000235059	0.0156892	0.0135066	0.0588779	0.0310357	0.26647	0.435195	0.789888	0.663555	0.888181	0.883641
AQP5	3414315	ILMN_1807036	2810543	-0.000197405	0.000839138	-0.00492551	-0.0342328	0.0747855	0.0416179	-0.0658618	-0.822549	0.94749	0.411043	0.976669	0.754523
AQP6	3414326	ILMN_1786381	4490678	0.000125313	0.000308755	-0.153041	0.0196921	0.114042	0.0394796	-1.34198	0.498793	0.179664	0.618081	0.342828	0.865208
AQP7	3203524	ILMN_1738494	5090209	0.000343574	0.00292305	-0.0825664	0.0586138	0.0413189	0.0381344	-1.99827	1.53703	0.0457406	0.124735	0.121137	0.435151
AQP9	3595594	ILMN_1715068	160494	0.00484228	0.00623727	-0.150219	-0.0260866	0.0310236	0.0115965	-4.8421	-2.24953	1.32e-06	0.0247876	1.23e-05	0.175001
AQPEP	2824902	ILMN_1810159	6400754	-8.12e-05	0.00652203	-0.0813619	-0.06675	0.10834	0.0290131	-0.75099	-2.30068	0.452694	0.0217014	0.636667	0.160529
AQR	3617757	ILMN_1717154	2690639	0.00191863	0.000966475	-0.282302	-0.0208698	0.0845037	0.0236399	-3.3407	-0.88282	0.000841736	0.377635	0.00418092	0.730835
ARAP1	3381241	ILMN_1786357	460747	0.0299615	5.78e-05	-0.724201	-0.00310505	0.0600651	0.0143948	-12.0569	-0.215706	5.05e-33	0.82928	1.03e-30	0.950177
ARAP2	2765590	ILMN_1709360	3120064	-0.000217427	0.000310033	-0.0367283	0.0124377	0.059563	0.0248842	-0.616629	0.499825	0.537507	0.617355	0.712224	0.865208
ARAP3	2878809	ILMN_1812618	7380255	0.0030324	0.0153203	-0.276055	-0.0452249	0.0741798	0.0127603	-3.72143	-3.54418	0.000200254	0.000419903	0.00116985	0.00935274
ARCN1	3351531	ILMN_1699703	2750653	0.00271583	0.0095345	0.220526	-0.0441877	0.0625756	0.0158574	3.52415	-2.78657	0.000428618	0.00547049	0.00231296	0.0641615
AREG	2731542	ILMN_1804421	6520600	0.000754866	0.000233135	-0.134311	-0.0174	0.0544101	0.0401467	-2.4685	-0.433409	0.0136012	0.66485	0.0452746	0.8842
ARF3	3453370	ILMN_1682938	2680446	0.0109979	0.00551588	-0.487727	-0.0291378	0.0691032	0.0137796	-7.05796	-2.11456	1.92e-12	0.0348186	4.68e-11	0.216633
ARF4	2678090	ILMN_1723884	1430136	0.000189514	1.04e-07	0.0604957	-0.000176719	0.0417194	0.0192654	1.45006	-0.00917288	0.147103	0.992684	0.296683	0.99682
ARFGAP3	3962587	ILMN_2227800	3850639	0.000656141	0.00187164	0.111984	-0.0471448	0.0546989	0.0383548	2.04728	-1.22918	0.0406824	0.219417	0.110585	0.574152
ARFGEF1	3139035	ILMN_2221408	3710681	0.000314068	0.000181408	-0.123287	0.006236	0.0845806	0.0163116	-1.45763	0.382305	0.145005	0.702351	0.293813	0.899436
ARFGEF2	3888055	ILMN_1789990	3610554	0.00672065	0.000674725	0.388695	0.0241469	0.0698109	0.0327411	5.56782	0.73751	2.71e-08	0.461058	3.44e-07	0.786822
ARFIP1	2747893	ILMN_2403911	2060630	0.0100801	0.000293753	-0.294608	0.0118767	0.0402431	0.0244116	-7.32071	0.48652	2.86e-13	0.62675	7.88e-12	0.869958
ARFIP2	3360941	ILMN_1750690	870082	0.000339261	0.00392782	0.11206	0.043991	0.0690833	0.0246758	1.6221	1.78275	0.104845	0.0750577	0.230015	0.335726
ARFRP1	3914072	ILMN_1703989	6110520	0.00887198	0.000490198	-0.608651	0.0185397	0.0902892	0.0294957	-6.74112	0.628556	1.75e-11	0.529844	3.73e-10	0.822494
ARG1	2925841	ILMN_1812281	5270753	2.83e-05	0.00883556	-0.0181811	0.0379294	0.0290274	0.0141453	-0.626342	2.68141	0.531119	0.00750329	0.706478	0.0799422
ARG2	3541383	ILMN_1800898	5720725	0.013104	0.00213883	0.482064	0.0475363	0.0622872	0.0361716	7.73937	1.31419	1.2e-14	0.189211	4.01e-13	0.533982
ARGLU1	3524618	ILMN_1788468	4880132	0.000887358	0.00753125	-0.156043	0.0261161	0.0678544	0.0105574	-2.29968	2.47373	0.0215073	0.0136063	0.0659615	0.118637
ARHGAP10	2746693	ILMN_1736112	2000669	0.00359356	0.00452366	0.253199	-0.050282	0.060659	0.0262726	4.17414	-1.91386	3.04e-05	0.056044	0.000211482	0.283871
ARHGAP15	2508611	ILMN_2208413	1660685	0.00736298	0.00100643	-0.332699	0.0148333	0.0545012	0.0164649	-6.10443	0.900907	1.11e-09	0.367946	1.77e-08	0.723524
ARHGAP18	2973694	ILMN_1791186	3140445	0.00103121	0.00287336	0.127301	0.0454217	0.0476448	0.0298068	2.67187	1.52387	0.00756719	0.127991	0.0276351	0.441112
ARHGAP19	3302177	ILMN_1688953	6110332	-0.000108885	0.00768022	-0.0242557	-0.0481509	0.033389	0.0192736	-0.726458	-2.49829	0.467592	0.0127067	0.64993	0.113588
ARHGAP21	3281621	ILMN_1811592	1260543	0.0035091	0.00251031	0.136246	0.0267966	0.031687	0.0188171	4.29974	1.42405	1.74e-05	0.154875	0.000127081	0.483646
ARHGAP22	3288337	ILMN_1676361	510520	-0.00015942	0.00047679	-0.0151831	0.0210553	0.0729404	0.0339659	-0.208158	0.619896	0.835114	0.535527	0.914031	0.825336
ARHGAP26	2833286	ILMN_1711490	6350706	0.000933117	0.000708363	0.138771	-0.017065	0.0552632	0.0225822	2.51109	-0.755685	0.0120668	0.450091	0.0411331	0.779477
ARHGAP28	3777263	ILMN_1796772	5810458	-0.000148658	0.000439182	0.0333942	-0.0140192	0.0812751	0.0235644	0.410878	-0.594933	0.681179	0.55208	0.820001	0.834736
ARHGAP29	2423829	ILMN_1751474	7000390	0.00200493	8.18e-05	0.225155	0.0101289	0.0706749	0.0394456	3.18579	0.256781	0.00145242	0.797423	0.00671103	0.936545
ARHGAP30	2440549	ILMN_1750805	5360537	0.00437407	0.0109286	-0.413551	-0.0352825	0.0845192	0.0118169	-4.89299	-2.98576	1.02e-06	0.00292701	9.71e-06	0.0407405
ARHGAP35	3837001	ILMN_1687362	7160162	0.002589	0.000625039	0.195648	0.0212851	0.0594487	0.0299868	3.29103	0.709816	0.00100506	0.478054	0.00486382	0.795655
ARHGAP36	3990927	ILMN_1705466	2340491	-0.000230558	0.00148322	0.019835	-0.0359238	0.0949951	0.0328378	0.2088	-1.09398	0.834613	0.274339	0.914023	0.640284
ARHGAP44	3710870	ILMN_2065022	110575	0.00105297	0.00249838	-0.208845	-0.0421288	0.090476	0.0296546	-2.30829	-1.42065	0.021023	0.155861	0.0645926	0.484428
ARHGAP5	3531479	ILMN_2322747	2570605	0.00508888	0.000907176	-0.267063	-0.0217436	0.0524631	0.0254228	-5.0905	-0.85528	3.7e-07	0.392688	3.84e-06	0.742606
ARHGDIA	3774283	ILMN_1734742	4760255	0.00103284	0.0112806	-0.0553642	-0.0487424	0.0253879	0.016065	-2.18073	-3.03408	0.0292492	0.00250166	0.0846003	0.036407
ARHGDIB	3445786	ILMN_1678143	1570193	0.00234519	0.0211113	-0.248487	-0.0885898	0.0746743	0.0212213	-3.32761	-4.17456	0.000882207	3.36e-05	0.00434967	0.00135866
ARHGEF10	3082874	ILMN_2132809	6900703	0.000667749	0.00130564	0.218697	-0.0222291	0.0915335	0.0216595	2.38926	-1.0263	0.016919	0.305105	0.0540779	0.668456
ARHGEF16	2317246	ILMN_1669928	1030753	-0.000105646	0.00143754	0.0505793	0.0354482	0.0917411	0.0329147	0.551327	1.07697	0.581434	0.281862	0.747424	0.647241
ARHGEF19	2397999	ILMN_1808999	6250546	-0.000117698	3.81e-05	-0.0686249	0.00447476	0.0975296	0.0255352	-0.703631	0.175239	0.481695	0.860943	0.662378	0.956736
ARHGEF26	2648535	ILMN_1773042	2480091	0.00104026	7.2e-05	0.224887	-0.00641614	0.0894022	0.0266423	2.51545	-0.240825	0.0119188	0.809761	0.0406975	0.941627
ARHGEF37	2835166	ILMN_1795300	5900367	0.00176449	0.000126295	0.185706	-0.00726391	0.060053	0.0227724	3.09236	-0.318978	0.00199655	0.749838	0.00883853	0.917709
ARHGEF38	2738244	ILMN_2179915	2710280	-0.000155734	0.00105141	0.0128879	0.0256324	0.0458303	0.0278359	0.28121	0.92084	0.778561	0.35745	0.881082	0.716065
ARHGEF39	3204692	ILMN_1717403	6840039	0.00316634	0.000936691	0.376554	0.0247747	0.0943677	0.0285063	3.99029	0.869096	6.69e-05	0.385091	0.000436649	0.736329
ARHGEF40	3527864	ILMN_1705743	7320274	0.0025412	0.000856859	-0.334741	-0.015269	0.0925216	0.0183698	-3.61797	-0.831198	0.000299826	0.406144	0.00168121	0.752477
ARHGEF5	3029646	ILMN_1708093	4150356	-0.000160467	0.000840182	-0.0255434	-0.0308612	0.0439827	0.0374956	-0.580761	-0.823061	0.561427	0.410752	0.730741	0.754523
ARHGEF6	4023467	ILMN_1803423	770703	0.00314681	0.00293723	0.250127	-0.0285109	0.0637133	0.0185043	3.92582	-1.54077	8.76e-05	0.123823	0.000554905	0.43311
ARID3A	3815278	ILMN_1670130	6510553	0.000359579	0.00840859	-0.148819	-0.0389041	0.0975247	0.0148763	-1.52596	-2.61517	0.127083	0.00910947	0.265675	0.0909437
ARID3B	3601675	ILMN_1696956	5960670	-0.000193302	0.0231766	-0.0191981	-0.0915564	0.0504231	0.0209066	-0.38074	-4.37931	0.703412	1.37e-05	0.833411	0.000630095
ARID5A	2494537	ILMN_2298567	4850014	0.000109042	3.03e-06	-0.120991	-0.00137225	0.104559	0.0277702	-1.15715	-0.0494143	0.247264	0.960603	0.427712	0.988072
ARIH1	3600744	ILMN_1694219	6560433	0.000118632	0.00118	0.077307	0.0224158	0.0833731	0.0229765	0.927242	0.975597	0.353845	0.3296	0.544671	0.691328
ARIH2	2621827	ILMN_1792825	1010682	0.0128532	2.46e-05	0.552987	-0.00303828	0.069677	0.021591	7.93644	-0.14072	2.54e-15	0.888132	9.18e-14	0.965772
ARL1	3468009	ILMN_1813091	4860468	-0.000174285	0.000405977	-0.0130586	-0.0126698	0.0587008	0.0221504	-0.22246	-0.57199	0.823964	0.567512	0.909062	0.843898
ARL10	2842530	ILMN_1769168	5270053	-0.000172906	0.000221127	-0.0976876	-0.0182018	0.080794	0.0431222	-1.2091	-0.422097	0.226683	0.673083	0.403654	0.88773
ARL13B	2632453	ILMN_2403047	4480722	-0.000214703	0.000130615	-0.0410341	0.00955037	0.0640388	0.0294412	-0.640769	0.324388	0.521702	0.745741	0.699309	0.916048
ARL14	2650357	ILMN_2232463	3400209	-0.000203184	0.00210388	-0.0292989	0.0550532	0.0466713	0.0422388	-0.627771	1.30338	0.530182	0.192872	0.705797	0.538077
ARL14EP	3325052	ILMN_1767642	3840736	-7.29e-05	0.0081481	-0.045335	0.0451469	0.0445031	0.0175399	-1.01869	2.57396	0.308399	0.0102579	0.494834	0.0981015
ARL15	2856634	ILMN_1774161	2140605	0.0125276	0.000881429	-0.264587	-0.0195458	0.0351909	0.0231848	-7.51862	-0.843043	6.51e-14	0.399491	1.93e-12	0.747406
ARL2BP	3662650	ILMN_1755391	2570523	0.00685173	0.000594901	0.229982	-0.0151555	0.0419477	0.0218859	5.48259	-0.692479	4.4e-08	0.488865	5.36e-07	0.801691
ARL3	3304475	ILMN_1780444	7150671	0.00575624	0.00130587	-0.272221	-0.0299056	0.04872	0.0291367	-5.58746	-1.02639	2.43e-08	0.305061	3.1e-07	0.668456
ARL4A	2990464	ILMN_1775405	1410113	-0.000213245	0.0218986	0.0116141	0.078437	0.036603	0.0184399	0.3173	4.25366	0.751029	2.39e-05	0.863671	0.00102126
ARL4C	2604390	ILMN_1768391	1300192	0.000428975	0.000381451	0.0980201	-0.00854847	0.0610759	0.0154183	1.60489	-0.554435	0.108581	0.579457	0.236215	0.849139
ARL5B	3237548	ILMN_2120022	1710753	0.000600745	0.000361036	-0.104695	0.0135406	0.0530743	0.0251036	-1.97261	0.539389	0.0485949	0.58979	0.126994	0.853756
ARL6	2632919	ILMN_1771822	5270646	-9.59e-06	0.000451564	0.0411572	-0.0178868	0.0582502	0.02965	0.70656	-0.603265	0.479873	0.546527	0.660551	0.831128
ARL6IP1	3683037	ILMN_2113362	5960324	0.000420149	0.00136353	-0.0592313	0.021442	0.041471	0.0204436	-1.42826	1.04884	0.153279	0.294613	0.306091	0.658888
ARL6IP4	3435681	ILMN_1779835	3120289	0.000233343	0.00318896	-0.0988293	0.0518586	0.0693492	0.0322972	-1.4251	1.60567	0.154191	0.108796	0.307464	0.405754
ARL6IP5	2628682	ILMN_1769810	2070563	0.0175276	0.00457951	0.64048	0.0281069	0.070369	0.0145957	9.10174	1.9257	1.25e-19	0.054545	7.75e-18	0.279213
ARL6IP6	2510884	ILMN_1797964	670382	0.00471024	0.00470885	-0.203167	0.0331239	0.0445717	0.0169619	-4.55822	1.95285	5.28e-06	0.051234	4.34e-05	0.271014
ARL8B	2608765	ILMN_1752837	130685	0.00035989	0.00151475	0.0822283	0.0208133	0.0576128	0.018826	1.42726	1.10556	0.153568	0.269293	0.306525	0.636214
ARL9	2728271	ILMN_1777691	6350066	-0.000179481	0.000283218	0.0212503	0.0198413	0.0425064	0.0415339	0.499931	0.477714	0.617146	0.633003	0.77209	0.872152
ARMC1	3138414	ILMN_1722066	7570209	0.00272243	0.00516534	0.180347	0.0430583	0.0476775	0.0210466	3.78266	2.04585	0.00015696	0.0411423	0.000935857	0.239153
ARMC10	3017080	ILMN_1784535	4780575	-0.000194935	0.00249961	0.0143432	-0.0349449	0.0516474	0.0245917	0.277714	-1.42101	0.781244	0.155759	0.882859	0.484359
ARMC12	2904788	ILMN_1712616	4220474	-0.000127045	0.000732652	0.0422447	-0.0218429	0.0624124	0.0284213	0.676864	-0.768542	0.498523	0.442423	0.677097	0.774384
ARMC2	2920619	ILMN_2213008	1710152	0.000332034	0.00288333	0.118938	0.0560979	0.0624837	0.0367489	1.9035	1.52652	0.0570327	0.12733	0.144319	0.439761
ARMC7	3734683	ILMN_1797298	730020	0.000359064	0.0090957	0.120465	-0.0596359	0.0618796	0.0219169	1.94677	-2.72101	0.0516175	0.00666937	0.133217	0.0734606
ARMC9	2531779	ILMN_1755732	4880619	-0.000202571	0.00235722	-0.0138779	0.0481944	0.0982227	0.0349279	-0.14129	1.37982	0.887647	0.16808	0.942308	0.504448
ARNT2	3604006	ILMN_1718046	4180307	0.00156134	0.00050408	-0.320743	-0.0175072	0.115875	0.0274667	-2.768	-0.637399	0.00566079	0.524072	0.0214978	0.819607
ARNTL2	3409127	ILMN_1798064	770523	0.00281481	7.62e-06	0.249468	-0.0025668	0.0735504	0.0327591	3.39179	-0.0783537	0.00069972	0.937569	0.00356216	0.981761
ARPC1A	3014671	ILMN_1759915	7610692	2.85e-05	0.0138364	0.0332654	-0.0621374	0.0300063	0.0184644	1.10861	-3.36525	0.26765	0.00080629	0.451327	0.0155702
ARPC2	2527606	ILMN_1792489	7160327	0.00154859	0.000492611	-0.258709	0.0129288	0.0880846	0.0205186	-2.93706	0.630102	0.00332841	0.528833	0.0137779	0.822037
ARPC5	2447454	ILMN_1768394	20142	0.00597229	0.00809454	-0.510727	-0.0406115	0.0981104	0.0158304	-5.20563	-2.56541	2.01e-07	0.0105118	2.18e-06	0.099425
ARPP19	3624697	ILMN_2059505	6620356	0.00556741	4.47e-05	-0.308241	0.00342177	0.0565944	0.0180342	-5.4465	0.189738	5.38e-08	0.849569	6.46e-07	0.954411
ARR3	3980522	ILMN_1660126	3850307	0.000173816	0.000835456	0.099735	-0.0225327	0.0756704	0.027454	1.31802	-0.820741	0.187557	0.412072	0.353411	0.755319
ARRB1	3382216	ILMN_2325168	2490288	0.000201446	0.00365372	-0.0707561	-0.0298167	0.0592722	0.0173438	-1.19375	-1.71916	0.232633	0.0860262	0.410669	0.362153
ARRB2	3707095	ILMN_1675866	3930133	-0.000191733	0.00108186	-0.00729828	0.0252773	0.0670195	0.0270607	-0.108898	0.934098	0.913288	0.350574	0.957633	0.710823
ARRDC1	3195363	ILMN_1661492	4850646	0.010954	0.000828482	-0.497149	-0.0200314	0.0680026	0.0245091	-7.31073	-0.817305	3.07e-13	0.414031	8.44e-12	0.756723
ARRDC2	3824713	ILMN_1715181	3870504	-0.000218707	0.00241751	0.0316946	-0.0300108	0.0925035	0.021476	0.342631	-1.39741	0.73189	0.162732	0.850625	0.495869
ARRDC3	2866704	ILMN_2198516	6450161	0.045793	0.000961417	-0.673632	-0.0244481	0.0452724	0.027766	-14.8795	-0.880505	4.84e-49	0.378887	4.49e-46	0.73143
ARRDC4	3610611	ILMN_1660544	6580168	-0.000179921	0.00610894	-0.011917	0.0483336	0.0562551	0.0217122	-0.211838	2.2261	0.832242	0.0263237	0.913011	0.181361
ARSA	3966143	ILMN_1656477	4920546	0.00251842	0.000289261	-0.279658	0.0082149	0.0871443	0.0170156	-3.20914	0.482785	0.00133965	0.629399	0.00627882	0.870653
ARSD	3997738	ILMN_1684956	4230609	0.00030154	3.5e-05	0.0696678	-0.00592389	0.0434807	0.0352751	1.60227	-0.167934	0.109158	0.866683	0.237049	0.958738
ARSE	3997780	ILMN_1727462	3940630	0.000982656	6.01e-07	0.114251	-0.000893386	0.0564967	0.0406034	2.02225	-0.0220028	0.0432033	0.982452	0.115895	0.994418
ARSF	3967018	ILMN_1664001	4390403	-8.68e-05	4.43e-05	-0.0595872	-0.0073705	0.0785328	0.0390299	-0.758755	-0.188843	0.448035	0.850271	0.632476	0.954411
ARSG	3732793	ILMN_1720604	3190753	0.0118826	0.00236283	-0.548209	-0.0257595	0.0731416	0.0186464	-7.49518	-1.38147	7.78e-14	0.167574	2.29e-12	0.503666
ARSJ	2782694	ILMN_1679318	2640725	2.24e-05	0.00465403	0.0853387	0.0576785	0.06579	0.0297099	1.29714	1.94139	0.194644	0.0526105	0.363242	0.274034
ARSK	2820865	ILMN_1657050	7560255	3.03e-05	0.00130247	0.046353	-0.033194	0.0549529	0.0323829	0.843504	-1.02505	0.398987	0.305693	0.588568	0.668656
ART1	3317824	ILMN_1807913	3710114	0.000128148	0.000249573	-0.043719	-0.00996372	0.03713	0.022219	-1.17746	-0.448432	0.239068	0.653979	0.4189	0.879182
ART4	3445723	ILMN_1805773	1400577	-0.000191072	4.69e-05	-0.00396742	0.00542331	0.0310637	0.0279022	-0.127719	0.194369	0.898377	0.845943	0.94802	0.953164
ARTN	2333574	ILMN_1773295	6270446	-5.47e-06	0.00618804	-0.0664775	0.0239794	0.0709846	0.0107024	-0.936506	2.24057	0.349057	0.0253656	0.539096	0.1775
ARV1	2385095	ILMN_1800935	1500246	-0.000198915	0.00333724	0.00120318	0.0340097	0.0594844	0.0207033	0.0202269	1.64271	0.983863	0.100889	0.99351	0.390477
ARVCF	3952956	ILMN_1677226	5810301	-2.73e-05	0.000321264	-0.107138	0.0163906	0.11575	0.0322141	-0.925596	0.508801	0.3547	0.611052	0.545658	0.862243
ARX	4003155	ILMN_1724162	4070020	0.000639193	2.91e-05	-0.193897	-0.00550863	0.0946084	0.035983	-2.04947	-0.15309	0.0404681	0.878372	0.110102	0.963129
AS3MT	3261923	ILMN_1771732	4280390	0.00127076	4.18e-05	0.0955049	0.00504739	0.0393169	0.0275163	2.42911	0.183432	0.0151708	0.854512	0.0495145	0.954651
ASAH1	3126087	ILMN_1684054	2030482	0.0047846	8.1e-06	-0.277846	-0.00174374	0.0594334	0.0215929	-4.67491	-0.0807551	3.02e-06	0.93566	2.61e-05	0.981107
ASAH2	3289189	ILMN_1776129	4830544	-0.000191172	0.0018573	0.00414489	-0.0383074	0.0397292	0.0312855	0.104329	-1.22445	0.916913	0.221193	0.959597	0.576241
ASAP1	3153428	ILMN_1690963	7000072	0.00938207	0.00189723	0.373177	-0.0147796	0.0548542	0.0119424	6.80307	-1.23757	1.14e-11	0.216289	2.51e-10	0.571496
ASAP2	2468811	ILMN_1757237	2030041	0.000850136	9.54e-05	0.14272	0.00701416	0.0595889	0.0253012	2.39507	0.277226	0.0166534	0.781688	0.0533565	0.930306
ASB1	2534865	ILMN_1683096	1820347	0.000750442	0.000728425	-0.124473	-0.0145664	0.0700334	0.0190082	-1.77734	-0.76632	0.0755719	0.443743	0.179826	0.775055
ASB10	3079438	ILMN_1781148	4570017	-1.13e-05	0.0010739	-0.0525533	0.0284152	0.0633571	0.0305326	-0.829478	0.93065	0.406873	0.352354	0.595798	0.712307
ASB13	3275042	ILMN_1654385	5050575	-0.000198578	0.0072494	-0.00664125	-0.0564992	0.0730343	0.0232832	-0.0909333	-2.4266	0.927549	0.0154913	0.966469	0.129273
ASB15	3021696	ILMN_1740528	2030747	-0.000202644	0.00254587	-0.00682758	0.0609896	0.0584281	0.0425272	-0.116854	1.43413	0.90698	0.15198	0.953758	0.480847
ASB16	3722806	ILMN_1810881	2320152	-0.000207929	0.00057441	0.00683948	0.0179709	0.0821756	0.0264106	0.08323	0.680441	0.933672	0.496449	0.970394	0.805244
ASB17	2418700	ILMN_2210101	270189	-0.000197953	0.00175112	-0.000483796	-0.0387108	0.0636216	0.0325612	-0.00760428	-1.18886	0.993933	0.234896	0.997498	0.595769
ASB4	3013498	ILMN_1813668	1170382	-0.000181673	0.000172085	-0.0211149	-0.00957687	0.0501894	0.0257201	-0.420705	-0.372349	0.673989	0.709745	0.8143	0.900889
ASB5	2794704	ILMN_1711269	1440445	-0.000152978	6.76e-07	-0.0533229	-0.000716927	0.0672123	0.0307309	-0.79335	-0.0233292	0.427611	0.981394	0.61393	0.994022
ASB6	3227014	ILMN_2397776	7000333	0.00102113	0.000144345	-0.151047	0.00819341	0.0737403	0.0240266	-2.04837	0.341014	0.0405758	0.733195	0.110345	0.911764
ASB7	3611506	ILMN_1680419	2190528	0.00142858	0.000201529	-0.207286	0.0121817	0.0697774	0.0302309	-2.97068	0.402954	0.00298542	0.687105	0.0124867	0.892734
ASB8	3453036	ILMN_2173740	870451	0.000175419	0.00467326	0.0719889	-0.0349003	0.0469309	0.0179398	1.53393	-1.94542	0.125108	0.0521232	0.262412	0.272962
ASCC2	3957003	ILMN_1679919	1570523	0.0548803	0.0149249	0.510194	0.0235071	0.0301921	0.00672141	16.8983	3.49734	2.34e-62	0.000499477	4.7e-59	0.0107862
ASCC3	2966636	ILMN_1772177	5490138	0.00220566	8.07e-05	0.298049	0.0105388	0.0801419	0.0413404	3.71902	0.254927	0.000202169	0.798854	0.0011803	0.937653
ASCL4	3430603	ILMN_1813075	540437	-0.000208146	0.00292517	0.017534	0.0658117	0.0370681	0.0428017	0.473022	1.53759	0.636218	0.124598	0.787835	0.434938
ASF1A	2923359	ILMN_1714737	7560048	0.000990066	0.00590208	0.114473	0.0398175	0.0530606	0.0181996	2.1574	2.18782	0.0310215	0.029011	0.0886073	0.194645
ASF1B	3852565	ILMN_1695414	2630673	0.00433622	0.0119904	-0.216867	-0.0524786	0.04828	0.0167697	-4.49186	-3.12938	7.22e-06	0.00182421	5.76e-05	0.0290366
ASH2L	3094447	ILMN_1666933	3440348	-0.000208309	0.000461882	0.00940963	-0.0138732	0.0638313	0.0227384	0.147414	-0.610123	0.882811	0.541978	0.939493	0.829523
ASIC1	3414351	ILMN_1769694	1690050	-0.000189398	3.4e-05	-0.0260168	0.00674683	0.0819136	0.0407485	-0.317612	0.165573	0.750792	0.868541	0.863597	0.959296
ASIC2	3752888	ILMN_1665932	2100255	-0.000164878	0.000407897	-0.0321497	-0.0158749	0.0891304	0.0276884	-0.360704	-0.573342	0.718335	0.566597	0.843248	0.843197
ASIC3	3031800	ILMN_1734479	6110482	0.000174591	0.000708927	0.0766715	-0.0226531	0.0532039	0.029965	1.44109	-0.755986	0.149622	0.449911	0.300541	0.779277
ASIC4	2528645	ILMN_2394897	4760133	-0.000186255	9.53e-05	-0.109204	0.00831084	0.0976557	0.0300014	-1.11826	0.277015	0.26351	0.78185	0.446596	0.930306
ASIC5	2790999	ILMN_1750295	3310397	-0.000199312	0.000337013	0.0263606	-0.0159508	0.0688592	0.0306082	0.382819	-0.521127	0.70187	0.602442	0.832271	0.858799
ASIP	3882823	ILMN_1791647	3460474	-0.000110741	0.00766971	-0.0183564	-0.0967993	0.0508306	0.038773	-0.361128	-2.49656	0.718019	0.0127682	0.843162	0.113883
ASNA1	3821847	ILMN_1657571	4480435	-0.000198578	0.00083214	-0.00154859	-0.0179587	0.0495965	0.0219247	-0.0312239	-0.819109	0.975092	0.413002	0.989046	0.755759
ASNS	3062576	ILMN_2398107	5960181	0.0018037	0.000598487	0.161859	0.0136848	0.0489903	0.0197026	3.30391	0.694565	0.000960119	0.487558	0.00468398	0.800745
ASNSD1	2519860	ILMN_2221673	6960242	0.00153286	0.00785002	-0.165223	0.0300489	0.0544098	0.0118958	-3.03664	2.526	0.00240453	0.0117554	0.0104113	0.107485
ASPA	3706659	ILMN_1692824	3140209	-0.000193596	0.00023472	-0.00391862	-0.0118947	0.0619891	0.0273517	-0.0632147	-0.434881	0.949598	0.663782	0.977784	0.883641
ASPDH	3868518	ILMN_1757747	1110221	0.00100086	0.00109447	-0.153947	-0.0350939	0.057657	0.0373526	-2.67005	-0.939531	0.00760833	0.347781	0.0277567	0.707146
ASPHD1	3655771	ILMN_1662490	7210703	-6.95e-05	0.000630581	-0.0593941	-0.018896	0.070772	0.0265037	-0.839231	-0.712958	0.40138	0.476108	0.590697	0.795229
ASPHD2	3940992	ILMN_2167426	7400102	0.000159149	0.000199823	0.061644	0.00834586	0.0504077	0.0207999	1.22291	0.401245	0.221421	0.688362	0.397871	0.893567
ASPM	2449559	ILMN_1815184	6130441	0.000171587	0.00182228	0.0666503	0.0319549	0.0511525	0.0263475	1.30297	1.21282	0.192643	0.225604	0.360458	0.582833
ASPN	3214845	ILMN_2168166	4050431	0.00046622	0.00439698	0.0807138	0.0769639	0.047263	0.0407921	1.70776	1.88673	0.0877426	0.059608	0.200969	0.294496
ASPRV1	2558355	ILMN_1762284	4860255	-0.000193992	0.0103545	-0.00403648	-0.0458964	0.0583361	0.0157974	-0.0691935	-2.90532	0.944838	0.00378405	0.975437	0.0492322
ASTE1	2695295	ILMN_1803813	6650026	0.000855594	0.000281165	0.140312	-0.01025	0.0631611	0.0215347	2.22149	-0.475978	0.0263618	0.634238	0.0777625	0.87234
ASTL	2565099	ILMN_1728055	6400070	0.00027379	0.00454043	0.0841751	0.0685768	0.0582525	0.0357651	1.445	1.91742	0.148519	0.0555892	0.298723	0.282453
ASUN	3448428	ILMN_2196337	6400082	0.00333968	0.00130368	0.222391	0.0226315	0.0549835	0.0220682	4.04469	1.02552	5.32e-05	0.305468	0.000352836	0.668656
ASXL2	2544925	ILMN_1698968	650075	0.00680305	0.000969879	0.330579	-0.0133875	0.0599994	0.0151379	5.5097	-0.884375	3.77e-08	0.376796	4.64e-07	0.730671
ASZ1	3069399	ILMN_1782246	1510431	-0.00020088	9.27e-06	0.00579556	-0.00237985	0.0789256	0.0275402	0.0734307	-0.0864137	0.941466	0.931162	0.973789	0.979988
ATAD1	3299255	ILMN_1654497	5260221	0.00367502	0.0020375	-0.270806	0.0274565	0.0629526	0.0214068	-4.30175	1.28261	1.73e-05	0.200053	0.00012609	0.548496
ATAD2	3151534	ILMN_2048700	1410242	1.51e-05	0.00385946	-0.053337	0.0413183	0.0623591	0.0233819	-0.855319	1.7671	0.392415	0.0776447	0.582484	0.342843
ATAD3C	2315918	ILMN_2231569	540296	0.00018163	2.02e-06	0.0382879	-0.0011185	0.0281424	0.027713	1.3605	-0.0403602	0.173731	0.967817	0.334901	0.989866
ATAD5	3716893	ILMN_1806956	2120592	-0.000147425	0.00256089	0.0418143	-0.0367609	0.0485446	0.0255574	0.861359	-1.43837	0.389081	0.150775	0.579391	0.478871
ATCAY	3817186	ILMN_1656576	7050577	0.000146249	0.000394168	-0.112086	0.0200242	0.0920173	0.0355288	-1.2181	0.563605	0.223245	0.573203	0.399842	0.846818
ATE1	3310413	ILMN_1756867	6770243	0.000214004	0.00238178	0.0684366	0.0413284	0.0652429	0.0297966	1.04895	1.38701	0.294251	0.165877	0.480406	0.50033
ATF1	3414695	ILMN_1801923	7200575	0.00287105	0.000397698	-0.108062	0.0121142	0.0284864	0.0213985	-3.79347	0.566124	0.000150295	0.57149	0.000900127	0.84556
ATF2	2588066	ILMN_1748271	2100735	0.000229546	2.81e-06	-0.0978203	-0.00131555	0.0730956	0.0276448	-1.33825	-0.0475875	0.180875	0.962059	0.344211	0.988388
ATF4	3945914	ILMN_1783394	6480053	0.00915464	0.000156314	-0.417966	0.00938827	0.0617161	0.0264552	-6.77241	0.354874	1.41e-11	0.722791	3.05e-10	0.906591
ATF6	2363919	ILMN_1703471	5420343	0.00018705	0.00268459	0.0552329	-0.0258831	0.0564307	0.0175741	0.978775	-1.4728	0.327738	0.141252	0.515231	0.463784
ATF7IP2	3647827	ILMN_1804445	2480075	0.00602206	0.00271814	0.215998	-0.0295301	0.0425213	0.0199258	5.07975	-1.48201	3.92e-07	0.138787	4.04e-06	0.460838
ATG12	2871923	ILMN_2188204	1410348	-0.00021145	0.00474992	0.00994216	0.0433822	0.0560852	0.0221181	0.177269	1.96139	0.859304	0.0502276	0.925908	0.267333
ATG13	3329404	ILMN_1730930	6620079	-6.07e-05	0.000670904	0.109395	0.0175354	0.0916995	0.0238441	1.19297	0.735417	0.232938	0.462331	0.410828	0.787794
ATG14	3565739	ILMN_1678808	4560154	0.0124815	0.000236343	0.437711	0.011651	0.0553486	0.026699	7.90827	0.436382	3.18e-15	0.662693	1.13e-13	0.883641
ATG16L1	2532793	ILMN_2365881	3420347	0.00175296	0.00133474	0.234311	0.0269191	0.0723952	0.0259414	3.23655	1.03769	0.00121765	0.299772	0.00578577	0.663259
ATG2B	3578278	ILMN_1735006	4780762	0.00127276	0.00149124	-0.214589	0.0305781	0.0774774	0.0278758	-2.7697	1.09694	0.00563128	0.273044	0.0214195	0.639462
ATG3	2688759	ILMN_2163732	1690253	0.000425782	0.00824308	0.12369	0.0689868	0.0762753	0.0266455	1.62162	2.58906	0.104947	0.00982291	0.230097	0.0956591
ATG4A	3986672	ILMN_1768960	5290370	0.00126396	8.62e-06	0.184664	0.00253274	0.0609756	0.0303993	3.02849	0.083316	0.00247026	0.933624	0.01065	0.980685
ATG4C	2339511	ILMN_1700923	5090291	0.00937218	0.00182884	-0.337986	0.0280098	0.0488435	0.0230532	-6.91978	1.21501	5.09e-12	0.22477	1.17e-10	0.581468
ATG4D	3820571	ILMN_1801905	1450647	0.00127813	0.000453398	-0.249081	0.0141003	0.0951911	0.023326	-2.61664	0.60449	0.00890637	0.545713	0.031677	0.830932
ATG5	2967550	ILMN_1718265	2030228	0.00161501	0.00597524	-0.226029	0.0507731	0.0671379	0.0230636	-3.36664	2.20144	0.000766602	0.0280294	0.00385863	0.190822
ATG7	2610732	ILMN_1790978	5220754	-0.000159216	0.00867943	0.0450591	-0.0542243	0.0661275	0.0204052	0.681397	-2.65737	0.495651	0.00805408	0.674097	0.0835213
ATG9B	3079257	ILMN_1734655	2570204	-2.41e-05	0.00077229	0.134528	0.02805	0.126647	0.035548	1.06223	0.789076	0.288184	0.430334	0.474661	0.767355
ATHL1	3315607	ILMN_1794707	3310278	0.00801849	0.00289595	-0.369439	-0.0132937	0.0584079	0.00868947	-6.32516	-1.52987	2.75e-10	0.1265	4.85e-09	0.438134
ATIC	2526759	ILMN_1673991	1770546	0.00101833	0.0132436	0.149111	-0.0549232	0.0602354	0.0166877	2.47547	-3.29124	0.0133388	0.00104731	0.0444874	0.0192967
ATL1	3535186	ILMN_1689251	430372	-0.000197674	0.000890909	-0.0011707	0.0225011	0.0597251	0.0265479	-0.0196015	0.847569	0.984362	0.396967	0.99367	0.746248
ATL2	2548776	ILMN_1716384	2850494	0.00595381	0.00102118	-0.325071	0.0240549	0.0622478	0.026507	-5.2222	0.907492	1.84e-07	0.364458	2.01e-06	0.722559
ATL3	3376560	ILMN_1751086	1240243	0.00915705	0.00508465	0.429355	0.0421032	0.0672792	0.0207434	6.38168	2.02972	1.91e-10	0.0427614	3.45e-09	0.244462
ATM	3347658	ILMN_1713630	580537	0.00292159	0.000989392	-0.248566	0.0356326	0.0663006	0.0398915	-3.74908	0.893238	0.00017947	0.372036	0.001057	0.726969
ATMIN	3670668	ILMN_1772540	1050180	-0.000131543	0.00137878	0.0265244	0.0239246	0.0383609	0.0226839	0.691443	1.0547	0.489319	0.291927	0.668665	0.656658
ATOH1	2736224	ILMN_1740671	6660129	8.62e-05	2.38e-05	0.0309564	0.00595503	0.0221261	0.0430051	1.39909	0.138473	0.161847	0.889907	0.318409	0.966162
ATOH7	3292561	ILMN_1752393	4480047	-0.000100522	7.34e-05	-0.030813	0.00720419	0.0474415	0.0296302	-0.649495	0.243137	0.516048	0.80797	0.693727	0.940982
ATOH8	2491788	ILMN_1654065	3840376	-7.15e-05	3.71e-08	-0.0717966	0.000130969	0.068077	0.0239474	-1.05464	0.00546904	0.291642	0.995638	0.478299	0.997874
ATP10B	2884727	ILMN_1698804	4730180	-0.000173627	0.00182054	-0.011762	-0.0300282	0.0586448	0.0247708	-0.200563	-1.21224	0.841048	0.225826	0.917576	0.583072
ATP10D	2726072	ILMN_1656159	5490681	-1.7e-05	0.000228953	-0.0584676	0.0151499	0.0612641	0.0352732	-0.954353	0.429503	0.339951	0.667689	0.529456	0.885603
ATP11B	2654815	ILMN_1658884	6060706	0.00488402	0.00902374	-0.254341	0.0589665	0.0535971	0.021758	-4.74543	2.71011	2.14e-06	0.0068901	1.9e-05	0.0752727
ATP11C	4024160	ILMN_1661428	430332	-0.000211089	0.000764393	-0.027463	-0.0205376	0.0700804	0.0261616	-0.391879	-0.785028	0.695164	0.432702	0.827904	0.769148
ATP12A	3481890	ILMN_1687765	1820414	0.000200316	7.55e-06	-0.146969	0.00223783	0.0931457	0.0286962	-1.57784	0.0779838	0.114666	0.937863	0.24656	0.981761
ATP13A1	3855910	ILMN_2134224	2060193	0.00717853	8.58e-05	-0.588223	-0.00396903	0.097768	0.0150943	-6.01652	-0.262949	1.91e-09	0.792667	2.93e-08	0.933938
ATP13A3	2711644	ILMN_1768895	840672	5.5e-05	4.71e-05	0.038706	0.00656586	0.0607821	0.0337136	0.636799	0.194754	0.524285	0.845642	0.700869	0.953137
ATP13A4	2711225	ILMN_1651303	780195	0.000255879	0.00159845	0.0801576	0.0324374	0.0745514	0.0285602	1.0752	1.13575	0.282337	0.256447	0.468112	0.622888
ATP1A2	2362892	ILMN_1777411	3990092	-0.000199764	0.000688248	0.0206438	-0.028801	0.104496	0.0386658	0.197556	-0.74487	0.8434	0.4566	0.918642	0.783764
ATP1A3	3863342	ILMN_1689098	770338	7.98e-05	0.00146695	-0.0580677	0.0257345	0.047243	0.0236541	-1.22913	1.08795	0.219081	0.27699	0.395258	0.643168
ATP1A4	2362950	ILMN_1696132	3460131	-0.000155066	0.00196559	0.0346513	-0.0497439	0.0954624	0.0394882	0.362984	-1.25971	0.716632	0.20819	0.842256	0.560208
ATP1B1	2366422	ILMN_2407824	4220468	-0.000161146	0.00199415	0.00534622	-0.0286524	0.0424499	0.0225813	0.125942	-1.26886	0.899783	0.204913	0.948839	0.554253
ATP1B2	3708938	ILMN_1747271	10255	0.015497	0.00571489	0.414226	0.0601948	0.046911	0.0279635	8.83004	2.15262	1.42e-18	0.0316883	7.53e-17	0.204334
ATP1B3	2645764	ILMN_1654322	3130092	0.00126009	3.71e-07	0.101203	-0.000355355	0.0398852	0.0205437	2.53735	-0.0172975	0.0111994	0.986204	0.038547	0.995068
ATP1B4	3989110	ILMN_1653211	6100706	0.000642363	0.000284433	-0.112238	0.0191931	0.067273	0.0400912	-1.6684	0.478737	0.0952982	0.632275	0.213702	0.872147
ATP2A2	3431483	ILMN_1655884	770079	0.00888166	4.03e-05	0.402968	-0.00429489	0.0642518	0.0238481	6.2717	-0.180093	3.87e-10	0.857131	6.71e-09	0.955657
ATP2A3	3741800	ILMN_1697827	1110678	0.0187316	0.00518654	-0.886517	-0.0368744	0.0929405	0.0179869	-9.53855	-2.05008	2.19e-21	0.0407275	1.63e-19	0.23812
ATP2B1	3464983	ILMN_1813399	6510164	0.000339619	3.91e-05	-0.0869379	0.00461757	0.0548177	0.0260071	-1.58594	0.17755	0.112815	0.859127	0.243352	0.955981
ATP2B3	3995666	ILMN_1660741	4010762	-0.000191092	0.00278953	-0.023478	0.0445161	0.110227	0.0296497	-0.212996	1.5014	0.831339	0.1337	0.912352	0.451846
ATP2C2	3671727	ILMN_1785413	2510669	-0.00016611	0.0004759	0.0581231	-0.0162189	0.120348	0.0261885	0.482958	-0.619316	0.629147	0.535909	0.782052	0.825581
ATP4A	3859832	ILMN_2209417	5270040	-8.65e-05	0.00182834	-0.112447	0.0432373	0.116039	0.0355909	-0.969045	1.21484	0.332569	0.224833	0.521397	0.581507
ATP4B	3526655	ILMN_1796405	6200553	-5.3e-05	0.00302195	0.051064	0.0632806	0.0764104	0.040489	0.668286	1.56291	0.503982	0.118524	0.682894	0.423062
ATP5B	3458033	ILMN_1772132	4540021	0.0214069	0.00470042	0.698859	-0.0417517	0.0704015	0.0213992	9.92676	-1.95109	5.17e-23	0.0514432	4.68e-21	0.2717
ATP5C1	3234140	ILMN_1701269	4780450	-0.000154194	0.0361883	-0.0412964	0.0538661	0.0528583	0.00976785	-0.781266	5.51464	0.434683	4.91e-08	0.620755	6.72e-06
ATP5D	3815610	ILMN_1679178	1110377	0.000548718	0.0025206	-0.111747	-0.0264685	0.0827535	0.0185487	-1.35036	-1.42698	0.176961	0.154031	0.33912	0.482868
ATP5F1	2351817	ILMN_1672191	1010598	2.46e-05	0.00300597	-0.0212396	0.0228774	0.0219729	0.0146767	-0.966629	1.55876	0.333776	0.119504	0.522745	0.425037
ATP5G1	3725456	ILMN_1712430	460040	-4.17e-05	1.39e-05	-0.040205	-0.00281262	0.042938	0.0265482	-0.936351	-0.105944	0.349137	0.915657	0.539096	0.975605
ATP5G2	3456313	ILMN_1807798	2320762	0.000933187	0.00297907	-0.125383	-0.038471	0.0476838	0.0247922	-2.62946	-1.55174	0.00857802	0.121174	0.0306904	0.429383
ATP5H	3770563	ILMN_1794912	3450743	0.000851605	0.000997869	0.0662741	0.0175693	0.0281111	0.0195854	2.35758	0.89706	0.0184325	0.369994	0.058038	0.725183
ATP5I	2756497	ILMN_1703415	2060343	0.00421836	0.000714841	-0.234573	-0.0206198	0.0512192	0.0271623	-4.57978	-0.759135	4.77e-06	0.448026	3.93e-05	0.777465
ATP5J	3927175	ILMN_1652806	3130563	0.000734129	0.00394344	-0.138291	0.0346651	0.0655674	0.019406	-2.10914	1.78631	0.0349814	0.0744797	0.0976659	0.334355
ATP5L	3351359	ILMN_2079285	4070544	0.000259778	0.0157164	-0.0525441	0.0657488	0.0336953	0.0183117	-1.55939	3.59054	0.118967	0.000352954	0.253187	0.00803988
ATP6AP1	3996381	ILMN_1697694	6590201	0.0112947	0.0328132	-0.6165	-0.0793514	0.0843723	0.0151416	-7.3069	-5.24062	3.16e-13	2.12e-07	8.62e-12	2.3e-05
ATP6AP2	3974556	ILMN_1677440	7560097	0.000414873	0.00482	-0.0962579	-0.0307526	0.0630459	0.0155639	-1.52679	-1.97589	0.126876	0.0485579	0.265384	0.262269
ATP6V0A1	3721718	ILMN_1752579	1660215	-0.00019888	0.0174016	0.000258137	-0.0529671	0.0197507	0.0140056	0.0130697	-3.78185	0.989573	0.000168905	0.995521	0.00466813
ATP6V0A2	3436021	ILMN_1700380	620092	-0.000203329	0.00214122	0.00924173	-0.0313252	0.0284768	0.0238229	0.324535	-1.31492	0.745546	0.188964	0.860109	0.533839
ATP6V0A4	3075381	ILMN_1812896	2100097	-4.82e-05	0.000202585	0.0642266	-0.0119129	0.0962929	0.0294868	0.666992	-0.404008	0.504808	0.68633	0.683629	0.892397
ATP6V0D1	3695699	ILMN_1795826	6330377	0.00534287	0.0144409	-0.355819	-0.0520336	0.0641418	0.0151296	-5.54738	-3.4392	3.05e-08	0.000617866	3.84e-07	0.0126774
ATP6V0D2	3105749	ILMN_1799889	1980706	-0.000182415	7.35e-05	0.0335811	0.00617511	0.075286	0.0253724	0.446047	0.243379	0.655582	0.807783	0.802496	0.940982
ATP6V0E1	2841284	ILMN_2071937	4730343	0.00923235	0.0037035	-0.455176	-0.0360107	0.0694158	0.0208049	-6.55724	-1.73088	6.03e-11	0.0839124	1.18e-09	0.358689
ATP6V0E2	3031181	ILMN_1785095	6180088	-0.000140319	0.0120193	-0.025	-0.0426647	0.0904088	0.013617	-0.276522	-3.13319	0.782158	0.00180101	0.88336	0.0287065
ATP6V1A	2636589	ILMN_1711516	7050131	0.0046147	0.0119074	-0.294382	-0.0459622	0.0630944	0.0147392	-4.66574	-3.11837	3.15e-06	0.00189276	2.71e-05	0.0297364
ATP6V1B1	2487918	ILMN_1812073	2850482	-0.000199236	1.1e-05	0.00209478	0.00288056	0.110353	0.0305504	0.0189825	0.0942887	0.984856	0.924907	0.994012	0.977662
ATP6V1C1	3110171	ILMN_1659801	2480241	0.00848349	0.00057236	-0.386588	-0.0116941	0.0583631	0.0172169	-6.62383	-0.679225	3.86e-11	0.497219	7.77e-10	0.805267
ATP6V1C2	2469529	ILMN_1660729	10070	0.00136451	0.00204081	0.178341	0.0509783	0.0749439	0.0397136	2.37966	1.28365	0.0173655	0.199688	0.0552121	0.547993
ATP6V1D	3569200	ILMN_1797310	1660736	0.000121434	0.015753	0.0493715	0.0533529	0.0417661	0.0148417	1.18209	3.59479	0.237224	0.000347345	0.416395	0.00797549
ATP6V1E1	3951887	ILMN_1798485	6860543	0.00136861	0.000134467	-0.145723	0.00527782	0.0489584	0.0160353	-2.97647	0.329137	0.0029297	0.74215	0.0123007	0.915284
ATP6V1F	3023211	ILMN_2099783	3870630	-0.000201392	0.00313851	0.0182716	-0.0294345	0.0783246	0.0184789	0.23328	-1.59287	0.815554	0.111639	0.904195	0.410453
ATP6V1G1	3186191	ILMN_1784523	6370091	0.00521349	0.0242629	-0.27765	0.0439457	0.0530153	0.00980135	-5.23717	4.48363	1.7e-07	8.57e-06	1.87e-06	0.000441318
ATP6V1G3	2449922	ILMN_1726273	5960162	-9.59e-05	0.000407774	-0.0409423	0.0157911	0.0498324	0.0275463	-0.8216	0.573255	0.411344	0.566655	0.599376	0.843197
ATP6V1H	3135452	ILMN_1689473	5390546	-0.000120487	0.000537484	0.0304796	0.0158719	0.0761758	0.0241143	0.400122	0.658193	0.689083	0.51063	0.824343	0.811734
ATP7A	3982423	ILMN_1808115	6280414	-0.000196364	1.35e-05	0.00126928	-0.00257754	0.0449708	0.0247546	0.0282246	-0.104124	0.977484	0.917101	0.990155	0.976243
ATP8A2	3482274	ILMN_1693896	4590577	-1.01e-05	0.0019551	0.109516	0.0484102	0.104406	0.0385326	1.04894	1.25634	0.294255	0.209409	0.480406	0.562124
ATP8B1	3809826	ILMN_1710523	6040240	0.0130292	0.00206926	0.505307	-0.0362133	0.0602881	0.0280162	8.38153	-1.29258	6.7e-17	0.196579	2.82e-15	0.542793
ATP8B4	3623552	ILMN_1783956	1820270	-0.000194121	0.000258009	-0.0019324	0.00820592	0.038405	0.0179974	-0.0503164	0.455951	0.959872	0.648566	0.982462	0.877318
ATP9B	3795045	ILMN_1658684	2120209	0.000632383	0.00647905	-0.15606	-0.0636485	0.0814903	0.0277574	-1.91507	-2.29303	0.05554	0.0221405	0.141372	0.162441
ATPIF1	2327375	ILMN_1685978	3780068	-0.000124525	0.00014714	0.03564	-0.00693367	0.0589566	0.0201384	0.604512	-0.344302	0.54553	0.730723	0.71843	0.910381
ATR	2698844	ILMN_2277201	670358	-0.000194655	0.00224324	0.028224	0.0387152	0.0814417	0.0287639	0.346554	1.34596	0.728941	0.178748	0.849153	0.520018
ATRAID	2474322	ILMN_1774584	2680438	-0.000201224	0.00703431	-0.0112293	-0.0481785	0.073176	0.020158	-0.153456	-2.39004	0.878045	0.0171091	0.936571	0.137718
ATRN	3874313	ILMN_1761850	2320433	0.00187122	0.0016152	0.27152	-0.0282344	0.0911564	0.0247301	2.97861	-1.1417	0.00290935	0.253967	0.0122408	0.620375
ATRX	4013224	ILMN_1666885	2340600	0.00120574	0.000961866	-0.107792	-0.021586	0.0385631	0.0245098	-2.79522	-0.88071	0.00520608	0.378776	0.0200298	0.731332
ATXN10	3948754	ILMN_1705900	6180014	0.0023263	0.00908644	0.21312	0.0420007	0.0642588	0.0154437	3.31659	2.71961	0.000917669	0.00669735	0.00450607	0.0737014
ATXN2	3471588	ILMN_1743829	1090400	0.00371028	0.00802676	0.310098	-0.0526528	0.0771989	0.0206114	4.01687	-2.55454	5.98e-05	0.0108424	0.000393772	0.101832
ATXN7L1	3066613	ILMN_1777260	2350615	0.00171226	8.78e-05	0.137347	-0.00874739	0.0442069	0.0328833	3.10691	-0.266013	0.00190102	0.790307	0.00845286	0.933874
ATXN7L2	2350741	ILMN_1664177	2710187	9.02e-05	0.0039887	-0.165587	-0.0484026	0.106959	0.0269415	-1.54814	-1.79658	0.121652	0.0728314	0.257221	0.330802
ATXN7L3B	3422703	ILMN_1826531	2940452	-0.000214476	0.00480876	-0.0151226	-0.0386316	0.0601473	0.0195744	-0.251426	-1.97357	0.801495	0.0488218	0.895754	0.262676
AUH	3214359	ILMN_2231911	7330180	-5.2e-05	5.18e-05	-0.0775094	0.00499324	0.0741031	0.0244443	-1.04597	0.20427	0.295626	0.838202	0.481586	0.952315
AUNIP	2402416	ILMN_1787280	150129	0.0010797	0.000366902	0.148374	0.0206436	0.0504646	0.0379649	2.94017	0.543755	0.00329523	0.586783	0.0136567	0.852337
AUP1	2560254	ILMN_1651378	6290053	0.00187634	0.00419577	-0.173774	-0.0354161	0.0563449	0.0192181	-3.08411	-1.84284	0.0020527	0.0657725	0.00906043	0.312396
AURKA	3910785	ILMN_2357438	5420309	-0.000197434	0.000147412	-0.0183403	0.0104655	0.0432401	0.0303684	-0.42415	0.344619	0.671475	0.730484	0.813101	0.910316
AURKB	3744263	ILMN_1684217	6770026	0.000339176	0.000144885	-0.130874	0.00958483	0.0786956	0.0280544	-1.66304	0.341652	0.0963661	0.732715	0.215598	0.911544
AURKC	3843122	ILMN_2350296	5890634	0.000164914	0.00217205	-0.143362	-0.038687	0.0957723	0.0292114	-1.4969	-1.32438	0.134481	0.185807	0.277626	0.529358
AVEN	3617170	ILMN_1710216	3800634	0.000128602	0.000189311	0.0823132	-0.00990295	0.0482668	0.0253567	1.70538	-0.390545	0.0881854	0.696252	0.201753	0.896541
AVIL	3458857	ILMN_1674265	4390369	0.000219111	2.74e-05	0.0892096	0.00360944	0.0528127	0.024307	1.68917	0.148494	0.0912486	0.881996	0.206818	0.964053
AVL9	2996033	ILMN_1722292	5700112	0.00185776	0.00385971	-0.23068	-0.0473694	0.074815	0.0268054	-3.08334	-1.76716	0.002058	0.0776352	0.00907388	0.342843
AVP	3895224	ILMN_2230117	580397	-0.000131508	0.000736259	-0.0463738	-0.0293941	0.0603625	0.0381527	-0.768256	-0.770433	0.442371	0.441302	0.627643	0.774344
AVPI1	3302495	ILMN_1671731	990500	-0.000198686	0.0164234	-0.0109663	-0.0766271	0.0522864	0.0208684	-0.209736	-3.67192	0.833882	0.000258998	0.913549	0.00647495
AVPR1A	3459722	ILMN_1712159	5220176	0.000117906	0.00163389	-0.0767012	0.045842	0.0492731	0.0399217	-1.55666	1.1483	0.119615	0.251236	0.254057	0.616955
AVPR2	3996047	ILMN_1698324	4200576	0.00116769	0.00207193	-0.154444	0.0221993	0.0605161	0.0171633	-2.55212	1.29342	0.0107362	0.19629	0.0371649	0.54279
AWAT2	4011569	ILMN_1703832	6590747	6.12e-05	0.00041941	0.0811376	0.0248539	0.0648242	0.0427498	1.25166	0.58138	0.210753	0.561171	0.384959	0.840535
AXIN1	3675047	ILMN_1692967	5550398	0.00626068	0.00143146	-0.526291	-0.0286513	0.0960669	0.02666	-5.47838	-1.07469	4.5e-08	0.282882	5.48e-07	0.648048
AXIN2	3767480	ILMN_1724480	1070189	2.06e-05	0.000626734	0.0777181	-0.0114476	0.065656	0.0161057	1.18372	-0.710778	0.236581	0.477457	0.415508	0.795322
AXL	3834046	ILMN_2364521	6480703	-0.000155417	3.31e-06	0.0662891	-0.00166935	0.124678	0.0323482	0.531681	-0.0516056	0.59497	0.958858	0.756945	0.987035
AZGP1	3063589	ILMN_1797154	7200324	-0.000171144	0.00382047	0.00747738	0.0690761	0.0385959	0.0392899	0.193735	1.75812	0.846391	0.0791629	0.919825	0.346374
AZI2	2667181	ILMN_1733680	5490348	-6.26e-05	0.00232576	-0.0685729	0.0226303	0.0545747	0.0165117	-1.2565	1.37056	0.208994	0.170949	0.382499	0.508501
AZIN1	3147591	ILMN_2327994	4070661	0.00313683	0.00667567	-0.252987	0.0260374	0.0652389	0.0111853	-3.87786	2.32783	0.00010672	0.020204	0.000663219	0.153675
AZU1	3815210	ILMN_1730867	5670739	0.00104125	0.000325729	-0.190268	0.0061971	0.0762623	0.012096	-2.49491	0.512325	0.0126306	0.608584	0.0426565	0.861379
B2M	3592023	ILMN_1725427	4890487	0.00337983	0.0165135	-0.355706	0.0402713	0.0834577	0.0109368	-4.26211	3.68217	2.06e-05	0.000248986	0.000148255	0.00632971
B3GALNT2	2461891	ILMN_1780188	160376	5.76e-05	0.000352915	0.0594258	0.0149703	0.0461827	0.0280719	1.28676	0.533285	0.198239	0.594005	0.368638	0.855289
B3GALT6	2315633	ILMN_1739749	2510477	-0.000113864	0.00100227	-0.0229269	-0.0191865	0.0742412	0.0213411	-0.308817	-0.89904	0.757474	0.368939	0.867612	0.724081
B3GALTL	3484296	ILMN_1764813	4640673	-6.11e-05	0.00211781	0.0573759	0.0403491	0.0548996	0.030855	1.04511	1.3077	0.296024	0.191403	0.482021	0.536816
B3GAT2	2960303	ILMN_1774208	7160041	0.00045281	0.000172003	0.0958988	-0.0159448	0.0579162	0.0428325	1.65582	-0.37226	0.0978204	0.709811	0.217881	0.900889
B3GAT3	3375935	ILMN_2210581	7510563	0.00127729	0.000583209	-0.0913757	-0.0150421	0.0314977	0.0219389	-2.90103	-0.685636	0.00373544	0.493168	0.0151607	0.804696
B3GNT1	3378228	ILMN_1715384	2260220	-0.000182203	0.000147632	-0.00967818	-0.0111076	0.0597813	0.0322075	-0.161893	-0.344877	0.871396	0.73029	0.933282	0.910282
B3GNT4	3435267	ILMN_1771260	2640386	0.000131195	0.00127749	0.0971603	0.0275474	0.0724637	0.027136	1.34081	1.01516	0.180042	0.310379	0.343221	0.673731
B3GNT7	2531908	ILMN_1721523	3840020	-3.43e-06	0.000593064	-0.0373634	-0.0183341	0.0459668	0.026517	-0.812835	-0.691409	0.416351	0.489537	0.603588	0.80192
B4GALNT2	3725572	ILMN_1707200	5290189	0.000396362	0.00251888	-0.131129	0.0580536	0.0849549	0.0406969	-1.54351	1.42649	0.122769	0.154172	0.258766	0.482879
B4GALNT3	3400236	ILMN_1753271	3850022	-0.000231162	0.000388743	-0.0389583	-0.0152873	0.101268	0.0273127	-0.384703	-0.559712	0.700474	0.575854	0.831515	0.847156
B4GALNT4	3315712	ILMN_1796663	670403	-7.34e-05	0.00258372	-0.126847	0.0412589	0.110677	0.0285571	-1.1461	1.44478	0.251808	0.148964	0.43293	0.475655
B4GALT2	2333678	ILMN_1806508	3120487	0.0010877	0.000825456	0.263234	-0.0245191	0.0925695	0.0300549	2.84364	-0.81581	0.00447814	0.414885	0.0176865	0.757448
B4GALT5	3908963	ILMN_1685824	2060047	0.0024435	8.95e-06	0.187882	0.000996037	0.0478732	0.0117336	3.92458	0.0848876	8.8e-05	0.932375	0.00055689	0.980377
B4GALT6	3803120	ILMN_1732555	4010553	-7.38e-05	0.00107751	0.0518356	0.0325026	0.0490594	0.034866	1.05659	0.932214	0.29075	0.351546	0.47719	0.711835
B4GALT7	2843283	ILMN_1663541	520332	0.000308659	0.00652475	-0.0752839	-0.0485122	0.0638721	0.0210816	-1.17867	-2.30117	0.238586	0.0216739	0.418245	0.160529
B9D2	3863046	ILMN_1806999	4280088	0.00147561	0.0203322	-0.164715	-0.0709746	0.0621678	0.0173323	-2.64952	-4.09493	0.0080858	4.71e-05	0.0292331	0.00171986
BAALC	3110217	ILMN_1707717	4010082	0.000440759	0.00024146	-0.10863	-0.0187582	0.0604236	0.0425277	-1.79781	-0.441082	0.0722663	0.659289	0.173641	0.882249
BAAT	3218041	ILMN_1771308	1980491	-0.000177815	5.12e-06	0.03189	-0.00246023	0.0747152	0.038291	0.426821	-0.0642511	0.669528	0.948789	0.811726	0.984373
BACE2	3921933	ILMN_1669323	2230731	-0.000177838	0.00466363	0.0163922	-0.0472024	0.0562603	0.0242886	0.291363	-1.9434	0.770785	0.0523667	0.875315	0.27355
BACH2	2964553	ILMN_1670695	3060603	0.00508585	0.000194584	0.260378	0.00814598	0.0514015	0.0205733	5.06557	0.395949	4.22e-07	0.692263	4.31e-06	0.894869
BAD	3376832	ILMN_1720360	6290544	0.00112125	0.00124942	-0.158317	-0.0396639	0.0682437	0.0395088	-2.31988	-1.00393	0.0203871	0.31576	0.0630792	0.679245
BAG1	3203482	ILMN_1733970	2060195	0.0124443	0.00469295	0.300272	0.0593426	0.0374587	0.0304394	8.01609	1.94953	1.35e-15	0.0516294	4.99e-14	0.271883
BAG3	3267314	ILMN_1659766	1340075	0.000175324	0.000931253	0.0689346	-0.0141733	0.0653056	0.0163557	1.05557	-0.866567	0.291216	0.386475	0.477825	0.737616
BAG4	3094494	ILMN_2221014	2850646	0.000895398	0.000616639	0.13275	-0.0166555	0.0595001	0.0236239	2.23109	-0.705026	0.0257191	0.481027	0.0762993	0.796854
BAHD1	3589947	ILMN_1739256	2650528	0.000517584	0.000884276	-0.101869	-0.0206356	0.0608868	0.0244381	-1.6731	-0.844404	0.0943701	0.398731	0.212108	0.747349
BAI1	3119017	ILMN_1797130	6220612	-0.000171854	0.000522865	0.0686136	0.0248848	0.145283	0.038333	0.472274	0.649175	0.636751	0.516438	0.788169	0.814536
BAI2	2404693	ILMN_1773109	2370474	-6.76e-05	0.00109383	0.0996039	-0.0360248	0.139344	0.0383547	0.714804	-0.939255	0.474763	0.347922	0.656141	0.707231
BAIAP2L1	3062868	ILMN_1703593	5700343	0.000383216	0.000107129	-0.130048	-0.0113903	0.0873438	0.0387722	-1.48892	-0.293777	0.136572	0.769015	0.281074	0.926125
BAIAP2L2	3960356	ILMN_1771652	6280605	0.000350724	0.000658504	-0.218952	-0.0234075	0.112293	0.0321274	-1.94984	-0.728584	0.051251	0.466499	0.132441	0.788956
BAK1	2950753	ILMN_1805990	1850019	0.00186677	0.00174747	-0.16833	-0.0203067	0.0517608	0.0170987	-3.25208	-1.18762	0.00115318	0.235386	0.00550546	0.59676
BAMBI	3240452	ILMN_1691410	430050	-0.000205238	0.00116332	-0.0322625	-0.0249584	0.0370461	0.0257656	-0.870874	-0.968668	0.383865	0.333044	0.574319	0.694086
BANF1	3335885	ILMN_1749243	3870136	-5.43e-05	0.00746551	-0.0204436	-0.0525531	0.0215835	0.0213386	-0.947185	-2.46281	0.34359	0.0140238	0.533676	0.120725
BANF2	3878076	ILMN_2293451	5670373	-0.000198438	7.46e-05	-0.00303544	-0.0101562	0.0434345	0.0414268	-0.0698854	-0.245161	0.944288	0.806404	0.975196	0.940815
BANK1	2737596	ILMN_1661646	4010139	0.00139685	0.000241668	0.0944507	-0.00746999	0.0290483	0.0169283	3.2515	-0.441272	0.00115551	0.659152	0.00551441	0.882237
BAP1	2676092	ILMN_1768363	4010528	0.00617606	0.00554213	-0.482088	-0.0411604	0.0871817	0.0194188	-5.5297	-2.11962	3.37e-08	0.0343879	4.19e-07	0.215036
BARD1	2598099	ILMN_2074258	5080561	0.000734265	0.000187707	0.0999005	-0.00790208	0.0467787	0.0203197	2.1356	-0.388887	0.03276	0.697477	0.0925141	0.897065
BARHL1	3192495	ILMN_1737662	2760646	-0.000103376	0.000380559	-0.0410004	-0.0223249	0.101557	0.0403133	-0.403717	-0.553786	0.686438	0.579901	0.822388	0.849173
BARHL2	2422398	ILMN_1706493	6620500	0.000891196	3.16e-05	0.126319	0.00562121	0.0661583	0.0352242	1.90934	0.159584	0.0562743	0.873255	0.142819	0.960922
BARX1	3215395	ILMN_1772312	6450040	-0.000161314	0.00186345	-0.0202011	0.042448	0.0852694	0.0346097	-0.23691	1.22648	0.812736	0.22043	0.902458	0.575428
BARX2	3355956	ILMN_1701170	6550168	0.00348176	0.00217123	-0.344345	-0.0486724	0.0876273	0.0367581	-3.92965	-1.32413	8.62e-05	0.185891	0.000547886	0.529358
BATF	3544605	ILMN_1668822	6220195	-2.84e-05	9.53e-07	-0.0656997	0.000493296	0.0614033	0.0178073	-1.06997	0.0277019	0.284684	0.977908	0.470762	0.992737
BATF3	2454818	ILMN_1763207	5900253	0.00125321	0.0035091	-0.173489	0.0505755	0.0633635	0.0300214	-2.73799	1.68465	0.00620319	0.0925004	0.0232066	0.374792
BAX	3838067	ILMN_2321064	3520092	0.00340358	0.00250225	-0.20032	-0.0207673	0.0477028	0.0146068	-4.19935	-1.42176	2.72e-05	0.155541	0.000190989	0.484056
BBS1	3336277	ILMN_1800590	5550554	0.00046642	0.0037515	0.125291	-0.0445674	0.0839332	0.0255825	1.49275	-1.74211	0.135566	0.0819273	0.279316	0.353844
BBS10	3462930	ILMN_1741985	3800243	0.00968846	1.84e-06	-0.34979	-0.00102125	0.0523771	0.026529	-6.67831	-0.0384957	2.68e-11	0.969303	5.56e-10	0.989866
BBS2	3692928	ILMN_1767612	1410246	-0.000161606	8.74e-07	0.035713	-0.000464209	0.0517486	0.017496	0.690126	-0.0265323	0.490147	0.97884	0.669114	0.993142
BBS5	2514365	ILMN_1663592	3170326	3.04e-05	3.36e-05	-0.0937721	0.00393633	0.0686879	0.0239104	-1.36519	0.164628	0.172254	0.869284	0.333373	0.959413
BCAM	3835777	ILMN_1790455	1260719	0.000783646	0.0015602	0.210525	-0.034318	0.0931397	0.0305849	2.26032	-1.12206	0.023844	0.262221	0.0715973	0.628184
BCAN	2361635	ILMN_1680300	10739	-0.000127359	5.86e-05	-0.0575755	-0.00613372	0.11521	0.0282354	-0.499746	-0.217235	0.617276	0.828088	0.77209	0.950099
BCAP29	3018535	ILMN_1697642	10044	0.000122191	0.000185187	0.0554365	0.0097609	0.0388183	0.0252698	1.4281	0.386267	0.153325	0.699416	0.306091	0.898106
BCAP31	4026669	ILMN_1812403	6450138	0.00360298	0.0313057	-0.144832	-0.0833474	0.0329727	0.0162971	-4.39249	-5.11423	1.14e-05	4.07e-07	8.75e-05	3.77e-05
BCAR1	3699426	ILMN_1672596	2710746	-0.000174395	3.54e-05	-0.014455	-0.00645188	0.0883245	0.0382113	-0.163657	-0.168847	0.870007	0.865965	0.93287	0.958296
BCAS1	3910360	ILMN_1733042	670372	-0.000166342	0.000216827	0.0150408	0.0150764	0.0809647	0.0360703	0.18577	0.417972	0.852633	0.676096	0.923028	0.889232
BCAS4	3888850	ILMN_2325506	5560193	-7.77e-05	0.00141612	-0.0521794	-0.0180574	0.0677971	0.0168934	-0.76964	-1.0689	0.441549	0.28548	0.626846	0.650678
BCAT1	3447694	ILMN_1766169	7650524	-0.000178661	0.00249987	0.00651136	0.0263565	0.0403189	0.0185468	0.161496	1.42108	0.871709	0.155737	0.933308	0.484359
BCCIP	3269662	ILMN_1758090	5270156	0.000783827	0.000682588	-0.113559	-0.0192145	0.0556897	0.0259026	-2.03913	-0.741798	0.041489	0.458457	0.112436	0.785164
BCDIN3D	3454147	ILMN_1796113	7400246	6.43e-05	9.89e-05	-0.0590418	-0.00722291	0.0491931	0.0255917	-1.2002	-0.282236	0.230116	0.777845	0.407655	0.929067
BCHE	2703902	ILMN_2176592	2030414	-0.000170075	0.000477509	-0.0114896	-0.0175432	0.0580155	0.0282789	-0.198044	-0.620363	0.843019	0.53522	0.918396	0.825153
BCKDHB	2914820	ILMN_1655433	7400630	0.000317325	0.000480839	-0.0663592	0.0153273	0.0489055	0.0246213	-1.35689	0.622524	0.174878	0.533799	0.336358	0.824722
BCKDK	3656829	ILMN_1693394	5220347	0.00234636	0.0395677	-0.238876	-0.092689	0.0758695	0.0160415	-3.14852	-5.77806	0.00165058	1.14e-08	0.00747161	1.96e-06
BCL10	2420808	ILMN_1716446	110148	-9.76e-05	0.00185709	-0.0433216	-0.0251992	0.0619685	0.0205812	-0.699091	-1.22438	0.484527	0.221219	0.664605	0.576241
BCL11B	3579114	ILMN_1667885	4480228	0.000528159	6.64e-05	-0.181636	0.00822903	0.0850934	0.0355917	-2.13455	0.231206	0.0328461	0.817222	0.0927356	0.945065
BCL2A1	3635198	ILMN_1769229	7380477	0.00407232	0.00552426	-0.157485	0.0477114	0.033539	0.022546	-4.69557	2.11618	2.73e-06	0.0346804	2.38e-05	0.21608
BCL2L10	3624410	ILMN_1749096	1110576	0.000445869	2.25e-05	-0.0677301	0.00412868	0.0400355	0.0306348	-1.69175	0.134771	0.0907548	0.892832	0.205989	0.966239
BCL2L11	2500275	ILMN_1774997	4390241	-1.28e-05	0.00147145	-0.0456393	-0.0425304	0.0618305	0.0390323	-0.738135	-1.08962	0.460467	0.276254	0.643169	0.642406
BCL2L12	3838795	ILMN_2396982	6420379	-5.89e-05	0.0223129	-0.0670243	-0.0931185	0.0626974	0.0216819	-1.06901	-4.29476	0.285116	1.99e-05	0.471232	0.000865686
BCL3	3835726	ILMN_1710514	6330725	0.00159916	0.0173105	-0.335277	-0.0498025	0.101388	0.0132041	-3.30686	-3.77174	0.000950096	0.000175756	0.00464449	0.00481332
BCL6	2709778	ILMN_1746053	5310451	0.00174033	0.00101147	0.139551	-0.0259329	0.0476942	0.0287134	2.92595	-0.903161	0.00344939	0.36675	0.0141742	0.723226
BCL6B	3708223	ILMN_1651285	1260093	0.000420857	0.000321992	-0.140697	0.0157331	0.0727183	0.0308869	-1.93482	0.509377	0.0530684	0.610648	0.136145	0.862138
BCL7B	3056108	ILMN_1754199	2850360	0.000356644	0.00263387	0.0716051	-0.0312629	0.0433545	0.0214308	1.65162	-1.45878	0.0986744	0.145072	0.219297	0.469419
BCL7C	3688038	ILMN_2371147	5260196	0.000380424	0.000193948	-0.141493	-0.00795882	0.0772605	0.0201336	-1.83138	-0.3953	0.0671033	0.692741	0.163849	0.895178
BCL9	2356818	ILMN_1704452	6400619	-0.000169411	0.00283072	0.0376788	-0.0344086	0.0742804	0.0227498	0.507251	-1.51248	0.612001	0.130861	0.76899	0.446706
BCL9L	3393993	ILMN_1743966	5960471	0.000577463	3.81e-05	-0.247079	0.00368904	0.124724	0.0210458	-1.98101	0.175287	0.0476442	0.860905	0.125026	0.956736
BCLAF1	2975680	ILMN_1690321	6760209	0.0207954	0.00191742	-0.615479	0.0213028	0.0623923	0.0171224	-9.86468	1.24415	9.5e-23	0.21386	8.24e-21	0.568318
BCMO1	3670700	ILMN_1814686	3890072	0.000501054	0.000193151	-0.117946	0.0138089	0.0755232	0.0350047	-1.56172	0.394487	0.118416	0.693341	0.252418	0.89554
BCORL1	3990616	ILMN_1767015	4070296	0.000295674	0.00174895	-0.116705	-0.0256682	0.0834981	0.0216041	-1.3977	-1.18812	0.162264	0.235187	0.318979	0.596382
BCRP2	3937943	ILMN_2067334	1820446	0.000577371	0.000792324	0.0635182	-0.029152	0.0309729	0.036474	2.05077	-0.799254	0.0403413	0.424413	0.109856	0.763333
BCS1L	2527939	ILMN_1738529	7100131	-8.53e-05	0.0015889	0.0406366	-0.0251433	0.0508392	0.0222045	0.799316	-1.13235	0.424145	0.257874	0.610661	0.624222
BDH1	2713382	ILMN_1683471	2490437	-0.00018356	0.000568121	-0.0125492	0.0198065	0.0634548	0.0292691	-0.197766	0.676703	0.843236	0.498817	0.91855	0.805946
BDH2	2780143	ILMN_1673360	4230398	-0.000199701	2.79e-05	0.00568723	-0.00556725	0.0376468	0.0371196	0.151068	-0.149981	0.879928	0.880822	0.937681	0.963937
BDKRB2	3550278	ILMN_1684086	2320719	-0.00019411	0.00353983	-0.0165814	0.0413311	0.0630036	0.0244268	-0.263182	1.69204	0.792421	0.0910817	0.889572	0.371794
BDNF	3367231	ILMN_1719820	510746	-0.000153685	0.00420695	-0.0295472	-0.0553606	0.101284	0.0300007	-0.291726	-1.84531	0.770508	0.0654129	0.875165	0.311306
BDP1	2814527	ILMN_1687149	7570563	-0.000139032	3.75e-05	-0.0197498	-0.00446058	0.0568855	0.025664	-0.347186	-0.173807	0.728466	0.862067	0.849153	0.956971
BECN1	3758157	ILMN_1744822	1690379	0.00781293	0.00246565	0.43945	0.0295215	0.0747655	0.0209181	5.87771	1.41129	4.43e-09	0.158602	6.43e-08	0.488503
BEGAIN	3579610	ILMN_1668924	360537	0.000200863	0.00293968	-0.100852	-0.0483188	0.0620144	0.0313471	-1.62627	-1.54141	0.103955	0.123666	0.228463	0.432689
BEND2	4001336	ILMN_2092390	3360475	0.00218186	0.00856653	-0.164485	0.0794591	0.0447844	0.0300997	-3.67282	2.63986	0.000242378	0.00847796	0.00138419	0.0865025
BEND5	2411799	ILMN_1675024	2140059	0.000501055	2.41e-05	0.127304	0.00456819	0.0599649	0.0327681	2.12298	0.13941	0.0338043	0.889166	0.0949737	0.965992
BEND6	2911226	ILMN_1706969	3520164	-0.000110425	0.000331995	-0.0356812	-0.0212317	0.0623891	0.0410487	-0.571914	-0.517232	0.567406	0.605157	0.735844	0.860782
BEST2	3821869	ILMN_1755796	6940315	-0.000186529	0.000159102	-0.00436892	-0.0135384	0.0771911	0.0378141	-0.0565988	-0.358025	0.954867	0.720432	0.980443	0.905424
BEST4	2409820	ILMN_1796685	3370180	0.000591513	0.000373916	-0.114691	-0.0146292	0.0656049	0.0266504	-1.74821	-0.548929	0.0804886	0.583228	0.188547	0.851127
BET1	3061651	ILMN_1684042	1510746	0.00290966	0.000561203	-0.154775	0.0154801	0.041444	0.0230164	-3.73456	0.672568	0.000190119	0.501443	0.00111481	0.807273
BET1L	3357723	ILMN_2060652	3130672	0.00784003	0.000168145	-0.359683	-0.00771246	0.0578762	0.0209543	-6.21469	-0.368062	5.56e-10	0.712938	9.35e-09	0.901362
BFAR	3649245	ILMN_1814808	610022	0.0018915	0.000936167	0.201061	0.0186907	0.0642225	0.0215119	3.13069	0.868853	0.00175392	0.385224	0.00788608	0.736467
BFSP1	3899111	ILMN_1712608	2370364	-3.26e-05	6.35e-05	0.0420361	0.00677553	0.0631511	0.029948	0.665644	0.226243	0.505669	0.821078	0.684411	0.946704
BFSP2	2643095	ILMN_1690217	2690152	0.000967572	0.000231567	-0.184172	-0.0158045	0.0671629	0.0365888	-2.74217	-0.431949	0.00612498	0.665911	0.0229568	0.884505
BGN	3995633	ILMN_2206746	460767	-0.000187465	0.000928755	-0.0497009	0.031673	0.0975992	0.0365991	-0.509235	0.865402	0.61061	0.387113	0.768216	0.737727
BHLHE22	3101153	ILMN_1699585	7210551	-0.000179502	0.0003936	-0.0303455	0.0149017	0.0930742	0.026459	-0.326035	0.563199	0.744411	0.573479	0.859291	0.846818
BHLHE40	2608725	ILMN_1768534	2640735	0.000760288	0.0115378	0.113252	-0.0394312	0.0490318	0.0128485	2.30977	-3.06894	0.0209408	0.00223084	0.0644359	0.033644
BHLHE41	3448088	ILMN_1726809	2900220	0.00234368	0.00181695	-0.190889	-0.0493603	0.0561844	0.0407584	-3.39754	-1.21105	0.000685206	0.226285	0.00349862	0.583257
BHMT	2817251	ILMN_1656638	1010463	-6.84e-05	2.2e-05	0.0727824	0.0035674	0.0591982	0.026826	1.22947	0.132983	0.218953	0.894245	0.395144	0.966239
BHMT2	2817212	ILMN_1813043	20440	0.000190171	0.000455844	0.0997515	-0.0203808	0.0598452	0.033625	1.66682	-0.606119	0.0956113	0.544631	0.214267	0.830932
BICC1	3247818	ILMN_1719570	2760577	0.000410384	0.00231248	-0.107785	-0.045924	0.0582799	0.0336037	-1.84945	-1.36663	0.0644519	0.172177	0.158986	0.510688
BICD1	3410445	ILMN_1692973	60048	0.000222448	0.00614507	-0.0276963	0.0653353	0.0236185	0.0292627	-1.17265	2.23272	0.240992	0.0258816	0.421399	0.179547
BICD2	3214984	ILMN_2380418	6840064	0.000554489	0.000577778	-0.114861	-0.0111205	0.0678416	0.0162953	-1.69307	-0.682434	0.0905035	0.495189	0.205612	0.805244
BID	3951927	ILMN_1763386	1440037	0.000520853	0.000470246	-0.195509	0.0101117	0.101914	0.016425	-1.91837	0.615625	0.0551199	0.538341	0.140541	0.827639
BIK	3947604	ILMN_1770505	6280440	0.00100482	0.00133778	0.147659	-0.0327726	0.0585326	0.0315464	2.52268	-1.03887	0.011677	0.299222	0.0400079	0.663259
BIN1	2574646	ILMN_1674160	5130440	0.000816247	0.00358722	0.198477	-0.0255537	0.0922307	0.0150018	2.15197	-1.70337	0.0314473	0.0889401	0.0895839	0.367903
BIN2	3454841	ILMN_1726342	3310343	0.000323579	0.00903172	0.0773248	0.0379673	0.0476549	0.0140033	1.6226	2.71132	0.104738	0.00686526	0.229847	0.0750694
BIN3	3127523	ILMN_1708485	1470291	0.000970998	0.0089337	-0.168599	-0.0545246	0.0710698	0.0202212	-2.3723	-2.69641	0.0177151	0.00717687	0.0561461	0.0773535
BIN3-IT1	3127579	ILMN_1811608	7050154	-0.000194125	0.00366628	-0.0194464	-0.0374298	0.0409079	0.0217347	-0.47537	-1.72212	0.634544	0.0854876	0.786409	0.360823
BIRC2	3346584	ILMN_2182704	7150600	0.00757067	0.0387302	0.273902	0.068365	0.042848	0.0119651	6.39241	5.71371	1.78e-10	1.63e-08	3.24e-09	2.73e-06
BIRC3	3346548	ILMN_1776181	5080021	0.00452237	0.0188568	0.189552	0.0422765	0.0397072	0.0107297	4.77373	3.94015	1.86e-06	8.96e-05	1.68e-05	0.00287149
BIRC5	3736290	ILMN_1803124	7550626	-0.0001623	0.000500052	0.0268616	-0.0238744	0.0745644	0.0376067	0.360247	-0.634846	0.718677	0.525735	0.8433	0.8203
BIRC6	2476219	ILMN_1801605	20601	-0.000194407	4.21e-05	0.00803616	-0.00393401	0.0992809	0.0213579	0.0809436	-0.184195	0.93549	0.853914	0.971278	0.954631
BIRC7	3893250	ILMN_1674036	3450347	-0.000117216	0.00214202	0.0402013	-0.0560783	0.0879228	0.0426396	0.457234	-1.31517	0.647523	0.188881	0.796107	0.533798
BIRC8	3870229	ILMN_1727144	4920563	-0.00013445	0.00126791	-0.0249309	-0.0422131	0.0629046	0.0417399	-0.396329	-1.01134	0.691879	0.312203	0.825623	0.675048
BLID	3395198	ILMN_1807331	4250441	-0.000165028	0.00464664	0.0151165	-0.0530025	0.0433832	0.0273232	0.348441	-1.93984	0.727524	0.0527991	0.848639	0.274681
BLK	3085990	ILMN_1668277	6330471	0.000346354	0.00140349	-0.0893848	-0.0111618	0.0607541	0.0104892	-1.47126	-1.06412	0.141284	0.28764	0.288214	0.651546
BLM	3608298	ILMN_1709484	2450717	-0.000169112	0.00358143	0.0287188	0.0481178	0.0617545	0.0282714	0.465048	1.70199	0.641917	0.0891991	0.791963	0.367903
BLNK	3301713	ILMN_2142935	3140100	0.000167649	0.000464602	0.0527436	0.0130033	0.0339718	0.0212501	1.55257	0.611917	0.120588	0.540791	0.255654	0.829346
BLOC1S2	3303392	ILMN_1679782	2630743	-6.26e-06	0.00202455	-0.0812453	0.0405039	0.0517416	0.0316805	-1.57021	1.27851	0.116428	0.201491	0.24926	0.550329
BLOC1S4	2717091	ILMN_1685095	6900195	0.00159954	0.00631958	-0.157221	-0.0496187	0.0539049	0.0219122	-2.91664	-2.26443	0.00355379	0.0238515	0.014536	0.171078
BLOC1S6	3592484	ILMN_1733666	1510719	-0.000195833	0.020218	0.00497881	0.0856786	0.0418735	0.0209835	0.118901	4.08315	0.905358	4.95e-05	0.952602	0.00179122
BLVRA	2999544	ILMN_1691436	2940022	0.00210791	0.0022699	0.149132	-0.0190486	0.0447267	0.0140688	3.3343	-1.35396	0.000861327	0.176185	0.00426417	0.516427
BLVRB	3862661	ILMN_1797793	6620521	0.0248589	0.0136728	0.260715	0.019346	0.0232598	0.00578358	11.2088	3.34499	8.06e-29	0.000866567	1.21e-26	0.0163927
BLZF1	2366490	ILMN_2106658	6130020	0.0115526	0.00748376	-0.366267	-0.0245455	0.0486603	0.00995419	-7.52703	-2.46585	6.11e-14	0.0139066	1.82e-12	0.120221
BMF	3619229	ILMN_1787794	6200035	0.00402633	0.000536218	-0.417784	0.0181048	0.0951555	0.0275393	-4.39054	0.657416	1.15e-05	0.511128	8.83e-05	0.811734
BMP10	2557948	ILMN_1791688	2120717	-0.000192917	0.000455591	-0.00250383	-0.0158746	0.0385374	0.0261978	-0.0649714	-0.605951	0.948199	0.544743	0.976987	0.830932
BMP15	3977483	ILMN_1702755	3840600	-0.000136934	0.0054587	0.0202791	-0.0774809	0.0469563	0.0368342	0.431872	-2.10351	0.665853	0.0357763	0.809379	0.219957
BMP2	3875423	ILMN_1722718	4280577	-0.000228619	0.00174013	-0.0129941	0.0432369	0.0481549	0.0364833	-0.26984	1.18511	0.787295	0.236373	0.886856	0.598507
BMP3	2733483	ILMN_1682661	4900397	0.000696676	0.00375073	0.0928465	0.0492597	0.0437616	0.0282789	2.12164	1.74192	0.0339163	0.081959	0.0951994	0.353854
BMP4	3565206	ILMN_1740900	990075	0.00053044	0.000285956	-0.150956	0.0135663	0.0619181	0.0282621	-2.43799	0.480017	0.0148035	0.631364	0.0485131	0.871783
BMP5	2958172	ILMN_1660552	2000471	-0.000144062	0.000807911	-0.0410102	0.0235917	0.0628861	0.0292308	-0.652134	0.807085	0.514344	0.41989	0.692497	0.7607
BMP6	2893895	ILMN_1747650	6980064	-0.000174509	0.00309636	-0.0328112	0.0260011	0.0481411	0.0164346	-0.681562	1.5821	0.495547	0.114077	0.674042	0.414791
BMP7	3910980	ILMN_1741566	3170100	-0.000134115	1.01e-05	-0.0338189	0.00353537	0.0786497	0.0392116	-0.429995	0.0901613	0.667218	0.928185	0.810563	0.978875
BMP8A	2331558	ILMN_1761264	2760092	-0.000119183	0.00935242	0.0296916	0.118549	0.0398848	0.0429596	0.744433	2.75955	0.456649	0.00593881	0.639893	0.0675161
BMPER	2996563	ILMN_1702371	4780082	-0.000179453	0.0010246	0.0275877	0.0349455	0.100933	0.0384435	0.273326	0.909009	0.784614	0.363657	0.885013	0.721803
BMPR1A	3256074	ILMN_1706957	3290441	-0.000207021	8.44e-05	-0.00774939	-0.00661433	0.0372874	0.0253617	-0.207829	-0.2608	0.835371	0.794323	0.914031	0.934733
BMPR1B	2736462	ILMN_1888359	2600707	0.00156997	0.00419499	-0.258557	-0.0491535	0.071976	0.0266751	-3.59227	-1.84267	0.000330932	0.0657976	0.00183175	0.312396
BMPR2	2523213	ILMN_2070896	460730	0.0035605	0.00324077	0.206952	0.0330946	0.0521124	0.0204451	3.97127	1.61871	7.25e-05	0.105959	0.000469167	0.399875
BMS1	3243708	ILMN_1772713	1190717	-9.94e-05	0.000535864	0.0194596	-0.0151338	0.0434078	0.0230277	0.448298	-0.657199	0.653957	0.511268	0.801401	0.811734
BMX	3969802	ILMN_1672307	3610706	0.00602396	6.82e-08	-0.284981	0.000209731	0.0530801	0.0282949	-5.36888	0.00741232	8.28e-08	0.994088	9.58e-07	0.997482
BNC1	3636562	ILMN_1692748	4880164	0.000214304	0.00169754	-0.0914093	0.0343005	0.0742735	0.0293043	-1.23071	1.1705	0.218488	0.242198	0.394422	0.605773
BNC2	3200040	ILMN_1656373	7050010	0.00199385	0.00127554	0.169523	-0.0339908	0.0473214	0.033509	3.58238	-1.01438	0.000343689	0.310751	0.0018954	0.673731
BNIP1	2841528	ILMN_2318733	6420376	0.000989023	0.00365554	0.138895	0.0483777	0.0546264	0.0281333	2.54264	1.71959	0.0110314	0.0859479	0.0380446	0.362123
BNIP2	3627076	ILMN_1770803	7380136	0.00465621	0.000234594	-0.269987	-0.00617613	0.0588557	0.0142057	-4.58727	-0.434763	4.6e-06	0.663868	3.82e-05	0.883641
BNIPL	2358646	ILMN_1699989	4390372	0.000522073	0.00046448	0.140217	-0.0168877	0.0748766	0.0276017	1.87264	-0.611837	0.0611753	0.540843	0.152645	0.829346
BOC	2636319	ILMN_1803956	7510113	-0.000198809	0.00047196	-0.000306844	0.0254256	0.123406	0.0412253	-0.00248646	0.616746	0.998016	0.537602	0.999094	0.826934
BOD1	2887633	ILMN_1716730	3780762	-2.55e-05	0.00160454	0.0502517	0.0222166	0.0483698	0.0195239	1.03891	1.13792	0.298898	0.255542	0.485342	0.622361
BOD1L1	2761321	ILMN_1695856	670431	0.0165299	0.000971385	-0.456522	-0.0228246	0.0521641	0.0257887	-8.75164	-0.885063	2.82e-18	0.376425	1.44e-16	0.730417
BPESC1	2644869	ILMN_1793049	2060392	6.74e-05	4.51e-05	0.059232	-0.00538275	0.0549154	0.0282299	1.0786	-0.190675	0.280815	0.848835	0.466156	0.954237
BPGM	3025500	ILMN_2352921	3060682	0.0133162	0.0738801	0.230425	0.0410983	0.0280256	0.00509702	8.22192	8.0632	2.52e-16	3.2e-15	9.97e-15	1.29e-11
BPHL	2892393	ILMN_1657746	1740487	0.00055227	0.000522437	0.0804539	0.016393	0.0426255	0.0252625	1.88746	0.648908	0.059156	0.51661	0.148563	0.814536
BPI	3884524	ILMN_1766736	4200746	0.00941252	0.000100256	0.176826	0.00293238	0.0230244	0.0103182	7.67994	0.284196	1.9e-14	0.776344	6.07e-13	0.928271
BPIFA1	3882387	ILMN_1774250	6420687	-0.000213049	0.00703624	0.00672824	0.0498863	0.0551026	0.0208697	0.122104	2.39037	0.902822	0.0170939	0.951045	0.137688
BPIFA2	3882304	ILMN_1762670	450133	-6.67e-06	0.000133023	-0.0461686	-0.010139	0.0556778	0.0309716	-0.829211	-0.327365	0.407024	0.743489	0.595874	0.915573
BPIFA3	3882369	ILMN_2347534	6520722	-6.92e-05	0.000176074	-0.116467	-0.0150973	0.0805883	0.040084	-1.44521	-0.376642	0.148461	0.706554	0.298707	0.900283
BPIFA4P	3882343	ILMN_1787830	1770215	-0.000207506	0.000248009	0.00684973	-0.0101488	0.0636559	0.022703	0.107605	-0.447025	0.914313	0.654995	0.957874	0.879702
BPIFB1	3882413	ILMN_1733904	1990142	-0.000177582	0.000589227	0.0772223	-0.0184858	0.088334	0.0268234	0.874208	-0.689167	0.382046	0.490946	0.572808	0.803536
BPIFB2	3882190	ILMN_1796928	3830491	7.53e-05	8.66e-05	-0.125445	-0.00722811	0.111425	0.0273605	-1.12582	-0.26418	0.260294	0.791719	0.442515	0.933874
BPIFB3	3882241	ILMN_1750365	7100075	-3.63e-05	0.00129864	-0.100344	-0.0319748	0.0798752	0.0312395	-1.25626	-1.02354	0.209078	0.306406	0.382596	0.668881
BPIFB4	3882265	ILMN_1703839	1690201	-0.000100433	0.00120432	0.0473924	0.0300924	0.0892832	0.0305317	0.53081	0.985613	0.595574	0.324662	0.757352	0.687201
BPIFB6	3882214	ILMN_1670091	6110184	-2.59e-05	2.31e-07	-0.0470024	0.000416669	0.0687718	0.0305404	-0.683456	0.0136432	0.49435	0.989118	0.672858	0.996006
BPIFC	3958422	ILMN_1708152	4010392	-0.000130326	9.34e-05	-0.0708701	-0.011437	0.0760015	0.0417012	-0.932483	-0.274261	0.351132	0.783965	0.541412	0.930592
BPNT1	2456805	ILMN_1712718	5360039	0.000115003	0.00681035	-0.0796002	0.0660868	0.0496394	0.0281056	-1.60357	2.35138	0.108872	0.0189792	0.236635	0.147738
BRAF	3076340	ILMN_1652472	7210202	0.00299235	3.82e-06	0.284183	0.00184904	0.0737595	0.03332	3.85283	0.0554934	0.000118207	0.955761	0.000724516	0.985731
BRCA2	3484641	ILMN_1677794	1570327	0.000498699	0.00150366	-0.129454	0.0432382	0.0721787	0.0392538	-1.79353	1.1015	0.0729487	0.271055	0.174967	0.637511
BRCC3	3996755	ILMN_1697546	4230259	-0.000124051	0.000655827	0.011925	-0.0182559	0.0294101	0.0251078	0.405471	-0.7271	0.685148	0.467406	0.821816	0.789604
BRD1	3965314	ILMN_1730019	1440450	0.00652528	0.00292448	-0.538447	-0.0347257	0.0947714	0.0225871	-5.68153	-1.53741	1.41e-08	0.124643	1.88e-07	0.434968
BRD3	3229042	ILMN_1785635	6660626	0.00158325	0.0149652	-0.279098	-0.058424	0.0970558	0.0166824	-2.87565	-3.50214	0.0040489	0.000490719	0.0162306	0.0106352
BRD7P3	2923257	ILMN_2147920	70736	-0.000203881	1.16e-08	0.00232323	7.65e-05	0.0167573	0.0250417	0.13864	0.00305306	0.88974	0.997565	0.94345	0.998725
BRDT	2346575	ILMN_1667928	4150097	-0.000203115	0.00109146	-0.00785648	-0.0377378	0.105214	0.040222	-0.0746717	-0.938237	0.940479	0.348445	0.973603	0.707726
BRE	2474791	ILMN_1778684	4060292	0.00169016	0.0103887	0.220289	-0.0588292	0.0695216	0.020215	3.16864	-2.91017	0.00154071	0.00372652	0.00705376	0.0486506
BRF2	3131720	ILMN_1665554	20500	0.000131497	6.12e-05	0.0808227	-0.0052453	0.0676804	0.0236184	1.19418	-0.222085	0.232463	0.824312	0.410607	0.94751
BRI3	3014229	ILMN_1781580	6270095	0.00324092	0.00281601	-0.187446	-0.0246619	0.0468591	0.0163483	-4.00019	-1.50853	6.42e-05	0.131867	0.000420644	0.448489
BRICD5	3676610	ILMN_1759411	60220	0.000789401	7.3e-05	-0.181965	-0.00553615	0.0825849	0.0228279	-2.20338	-0.242517	0.0276133	0.80845	0.0807622	0.941148
BRIP1	3765580	ILMN_1760757	5960730	0.000309778	8.05e-05	-0.0546401	-0.00712201	0.0442835	0.0279716	-1.23387	-0.254616	0.217309	0.799095	0.392884	0.937685
BRIX1	2806231	ILMN_2155172	1110722	0.000158307	0.00335442	-0.0597568	0.0332866	0.0546355	0.020211	-1.09374	1.64695	0.274123	0.100014	0.458584	0.388765
BRK1	2610317	ILMN_1764500	2000546	0.00710885	0.00330881	0.296614	0.0243156	0.0476232	0.0148658	6.22835	1.63567	5.1e-10	0.102355	8.66e-09	0.39402
BRMS1L	3532560	ILMN_1775943	3140039	-0.000224165	6.46e-06	0.00830086	0.00200389	0.04497	0.0277717	0.184587	0.0721558	0.853561	0.942498	0.92343	0.982704
BRPF1	2609870	ILMN_2365549	6940242	0.00137068	0.0267595	0.210905	-0.100448	0.0809589	0.0213011	2.60509	-4.71561	0.00921207	2.91e-06	0.0326199	0.000187516
BRS3	3992512	ILMN_1756165	1230541	0.000158082	0.00214933	-0.058986	-0.0518824	0.0467792	0.0393819	-1.26095	-1.31742	0.207387	0.188128	0.380309	0.533272
BRSK1	3842059	ILMN_2185845	2000110	-0.000132461	0.0017353	-0.0661309	-0.0165581	0.135911	0.0139912	-0.486577	-1.18347	0.62658	0.237024	0.779746	0.599777
BRWD1-IT2	3932261	ILMN_2202320	3290575	0.000484886	0.000861652	-0.0353886	0.0263775	0.0262697	0.0316459	-1.34713	0.833522	0.178	0.404834	0.340676	0.750962
BSDC1	2405036	ILMN_1734483	3370450	0.00218683	0.0160854	0.33614	-0.0774388	0.104186	0.0213141	3.22634	-3.63322	0.00126184	0.000300285	0.00596516	0.00720002
BSG	3815014	ILMN_1730709	4850372	0.0189431	0.000971777	0.284791	-0.0331378	0.0282562	0.0374337	10.0789	-0.885241	1.15e-23	0.376329	1.09e-21	0.730354
BSN	2622153	ILMN_1760246	3850730	7.35e-05	2.7e-05	-0.0904679	0.00628334	0.114339	0.0425775	-0.791224	0.147574	0.428851	0.882721	0.61486	0.964176
BSND	2337392	ILMN_1726420	3440435	0.000540713	0.00281027	0.124221	0.0535278	0.0568767	0.0355196	2.18404	1.50699	0.0290056	0.132262	0.083959	0.449205
BST1	2719617	ILMN_1770161	6270681	0.000124335	8.09e-06	-0.0663722	-0.00134653	0.0505301	0.0166754	-1.31352	-0.0807497	0.189068	0.935664	0.355313	0.981107
BST2	3854454	ILMN_1723480	4900674	0.0011706	0.00051994	-0.107771	-0.00776647	0.0391362	0.0119972	-2.75374	-0.647355	0.0059129	0.517614	0.0223076	0.815326
BTAF1	3257938	ILMN_1676842	2070209	0.000500933	0.00194756	-0.177066	0.0165731	0.0778527	0.0132171	-2.27437	1.25391	0.0229853	0.210291	0.0695736	0.563113
BTBD1	3636470	ILMN_1691927	4480008	0.0010188	0.00395091	0.171146	-0.0386318	0.0805393	0.021606	2.125	-1.78801	0.0336348	0.0742049	0.0945636	0.333645
BTBD16	3268222	ILMN_1677684	5690102	-9.92e-05	0.000511974	0.0596548	-0.0261596	0.0946941	0.0407234	0.629973	-0.642374	0.528741	0.52084	0.704715	0.816626
BTBD3	3876645	ILMN_2334350	6020653	0.00140731	0.000262519	0.164983	0.0115748	0.0582065	0.025167	2.83445	0.45992	0.00460876	0.645716	0.0181252	0.875745
BTBD6	3554592	ILMN_1744725	6900307	0.000957578	0.00594428	0.0852518	-0.0467652	0.0360843	0.0212987	2.36258	-2.19569	0.0181862	0.0284404	0.0574276	0.192532
BTBD8	2346657	ILMN_1796773	3190136	0.000258803	0.00020692	-0.0623384	-0.0128778	0.0514605	0.0315395	-1.21138	-0.408309	0.225805	0.683171	0.402984	0.891553
BTBD9	2952497	ILMN_1732271	5560273	0.000921051	0.000731882	-0.153367	-0.0229227	0.0678956	0.0298419	-2.25886	-0.768138	0.0239343	0.442663	0.0718507	0.774384
BTC	2773545	ILMN_2081070	4280131	-5.98e-05	8.58e-08	-0.0480806	-0.00023437	0.0625323	0.0281841	-0.768892	-0.00831569	0.441993	0.993367	0.627328	0.997148
BTD	2612401	ILMN_1699728	1410091	0.000230099	2.47e-06	-0.0749095	0.00107474	0.0601632	0.0240774	-1.24511	0.0446371	0.213151	0.964409	0.388149	0.989665
BTF3	2815331	ILMN_2245676	7550575	0.000817818	0.00654681	0.100162	0.0514384	0.0486524	0.0223152	2.05873	2.30508	0.0395718	0.0214523	0.108151	0.15947
BTF3L4	2336271	ILMN_1729908	2320112	-0.00016126	0.000854658	0.0129909	0.0202793	0.0348907	0.0244291	0.37233	0.830128	0.709663	0.406748	0.837939	0.752907
BTG1	3465409	ILMN_1775743	4730369	0.00230539	0.0321154	-0.21705	-0.0766918	0.0638308	0.0147984	-3.40039	-5.18245	0.000678109	2.86e-07	0.0034712	2.97e-05
BTG2	2375664	ILMN_1770085	1010487	0.00340589	5.07e-06	-0.221536	-0.00100194	0.056402	0.0156709	-3.92781	-0.0639365	8.69e-05	0.949039	0.000550924	0.984373
BTG3	3926080	ILMN_1707339	4920053	0.000870254	0.00301151	0.101543	0.0348113	0.0462864	0.0223121	2.19381	1.5602	0.0282947	0.119163	0.082256	0.424326
BTG4	3390949	ILMN_1689154	110220	-2.42e-05	0.00132109	-0.0362584	-0.0321379	0.044395	0.0311305	-0.816723	-1.03236	0.414126	0.302257	0.601956	0.665345
BTK	4015709	ILMN_1662026	6380161	0.000133417	0.00335287	0.0584525	-0.0309487	0.0526125	0.0187958	1.111	-1.64657	0.266621	0.100093	0.449969	0.38886
BTLA	2688717	ILMN_1778536	2450494	0.000575209	0.0119559	0.0738841	0.064869	0.0366386	0.0207594	2.01656	3.1248	0.043794	0.00185242	0.117062	0.0292892
BTN1A1	2899473	ILMN_1698953	7400112	0.000351185	0.000895711	0.119204	-0.0220185	0.0579731	0.0259086	2.05619	-0.849852	0.0398153	0.395697	0.108669	0.744824
BTN2A1	2899437	ILMN_2364852	2570477	-9.84e-05	0.00135964	-0.0505878	-0.0167047	0.0575947	0.0159496	-0.878341	-1.04734	0.3798	0.295303	0.570965	0.659581
BTN2A3P	2899393	ILMN_1721813	4210598	3.43e-05	0.00298501	0.0689345	0.0438338	0.0497762	0.0282199	1.38489	1.55329	0.166147	0.120803	0.324696	0.428772
BTN3A1	2899372	ILMN_1802708	3130600	0.000644791	0.00241832	0.089616	-0.0175429	0.0467524	0.0125518	1.91682	-1.39764	0.0553173	0.162662	0.140925	0.495869
BTN3A3	2899413	ILMN_2373831	1430717	0.0082699	0.00336305	0.275425	-0.0251908	0.0438211	0.0152757	6.2852	-1.64908	3.55e-10	0.099578	6.19e-09	0.388055
BTNL3	2844888	ILMN_1660446	4560327	0.000717988	0.0017113	-0.0479949	-0.0335229	0.0281303	0.0285243	-1.70616	-1.17524	0.0880391	0.240297	0.201495	0.604119
BTNL8	4047607	ILMN_1676895	5860551	-0.000199737	0.00256428	-0.00269295	-0.0238494	0.019925	0.0165699	-0.135154	-1.43932	0.892495	0.150504	0.944493	0.478516
BTNL9	2844908	ILMN_1772976	2060364	2.3e-05	0.000136865	0.104898	0.0144755	0.102519	0.0435931	1.02321	0.33206	0.30626	0.739943	0.492583	0.914401
BTRC	3261165	ILMN_1689438	1440497	0.00574707	0.00621865	0.343938	0.0697	0.064638	0.031031	5.32098	2.24614	1.08e-07	0.0250046	1.23e-06	0.175843
BUB1	2570616	ILMN_2202948	2070224	0.00187328	1.84e-06	0.233045	-0.00119646	0.0720178	0.0310999	3.23594	-0.0384716	0.00122026	0.969323	0.0057919	0.989866
BUB3	3268669	ILMN_2386100	6350348	-0.000144534	0.00253726	0.0272058	0.0271055	0.0680356	0.0189324	0.399876	1.4317	0.689265	0.152675	0.824381	0.480977
BUD13	3392840	ILMN_1749210	50487	-9.5e-05	0.00128136	0.034202	-0.0262888	0.0700815	0.0258571	0.488032	-1.0167	0.625548	0.309648	0.778704	0.673147
BUD31	3014742	ILMN_1710697	4490706	0.00667609	0.00162143	-0.334455	0.0256402	0.0582846	0.0224147	-5.73831	1.1439	1.01e-08	0.253053	1.37e-07	0.619376
BVES	2967249	ILMN_1676294	6900682	0.000370874	0.00138941	-0.0543541	-0.0421907	0.0341411	0.0398491	-1.59204	-1.05876	0.111438	0.290073	0.240909	0.654687
BYSL	2906990	ILMN_1682792	4860356	-0.00020725	0.0021252	-0.00132606	-0.0299165	0.0406576	0.0228373	-0.0326154	-1.30998	0.973983	0.190629	0.98817	0.535714
C10ORF11	3252690	ILMN_1783247	650743	0.00200462	0.00750838	0.167443	-0.0425637	0.0503015	0.0172327	3.3288	-2.46994	0.000878475	0.01375	0.00433659	0.119496
C10ORF12	3259703	ILMN_1665508	4230392	0.000904734	0.00321826	0.0996333	0.0364615	0.0412834	0.022604	2.4134	1.61305	0.01584	0.107181	0.0512544	0.40285
C10ORF2	3260937	ILMN_1701243	2190538	-0.000114116	0.00125683	0.0347568	-0.0247636	0.0693719	0.0245938	0.501021	-1.0069	0.616378	0.314328	0.77209	0.677433
C10ORF25	3286792	ILMN_2231921	4760148	-0.000203491	0.000821175	-0.00432671	0.0256577	0.04858	0.0315326	-0.0890636	0.81369	0.929035	0.416098	0.967382	0.757935
C10ORF35	3250438	ILMN_1662470	2510253	0.000908651	0.000791063	-0.150586	0.0187196	0.0636849	0.02344	-2.36455	0.798618	0.0180894	0.424782	0.057182	0.763343
C10ORF54	3293724	ILMN_2205963	6620292	0.0206172	0.0240288	-0.767184	-0.0634908	0.0813343	0.0142313	-9.43248	-4.46134	5.95e-21	9.48e-06	4.2e-19	0.000479975
C10ORF62	3259959	ILMN_1720898	6560364	-0.000191377	1.63e-05	-0.0051146	0.00426749	0.0660154	0.0372983	-0.0774759	0.114415	0.938248	0.908941	0.972447	0.972194
C10ORF67	3281358	ILMN_1719577	4850762	0.000250822	0.000735138	-0.0784557	-0.0200958	0.0537946	0.0261037	-1.45843	-0.769846	0.144784	0.44165	0.293564	0.774344
C10ORF76	3304116	ILMN_1792110	730593	0.00159509	0.00158048	0.139431	-0.0274543	0.0545177	0.0243101	2.55753	-1.12934	0.0105707	0.25914	0.0366585	0.625027
C10ORF82	3308378	ILMN_1782861	2120315	0.00104774	0.00135966	-0.115622	0.0256199	0.0584653	0.0244617	-1.97761	1.04735	0.0480265	0.295299	0.125754	0.659581
C10ORF88	3310725	ILMN_1775423	3440181	-0.000200769	0.00397104	-0.0245504	0.0422045	0.0445597	0.023544	-0.550956	1.79258	0.581688	0.0734698	0.747424	0.332009
C10ORF90	3312045	ILMN_1680367	4560470	0.000403292	0.000250048	-0.11135	0.0174044	0.0655683	0.0387748	-1.69822	0.44886	0.0895275	0.653671	0.204048	0.879182
C10ORF91	3272148	ILMN_2183519	7210291	0.000515248	5.03e-06	-0.107157	-0.00283979	0.0493059	0.04462	-2.17332	-0.0636438	0.0298028	0.949272	0.0857868	0.984373
C10ORF95	3304385	ILMN_1797104	1300735	-0.000210963	0.00157991	-0.0205788	-0.0471523	0.0554065	0.0417597	-0.371415	-1.12913	0.710344	0.259226	0.838277	0.62511
C10ORF99	3255284	ILMN_1802192	4250092	0.000146914	0.00308338	-0.111373	0.065256	0.0551643	0.0413335	-2.01894	1.57877	0.0435468	0.114839	0.116557	0.416318
C11ORF1	3348748	ILMN_2128967	610400	-0.000212736	0.00609872	-0.00637505	0.0394853	0.0414181	0.0177524	-0.153919	2.22422	0.877679	0.0264502	0.93643	0.18192
C11ORF16	3362096	ILMN_1708304	670543	-3.07e-05	0.00155039	0.0893384	-0.0461797	0.0704806	0.0412865	1.26756	-1.11852	0.205014	0.263728	0.377278	0.629665
C11ORF24	3379452	ILMN_1808163	6110348	-0.000161571	0.00590457	0.0229127	-0.0510921	0.0551122	0.023348	0.415746	-2.18829	0.677614	0.028977	0.817015	0.194634
C11ORF30	3340913	ILMN_1812134	6980725	0.00202945	0.00187716	0.232268	0.0344033	0.0767623	0.0279476	3.02581	1.23099	0.00249221	0.218738	0.0107216	0.573378
C11ORF31	3331603	ILMN_1786872	50360	-0.000210949	0.000968909	0.0142936	-0.0274097	0.0554779	0.0310088	0.257646	-0.883933	0.796691	0.377035	0.892311	0.730835
C11ORF40	3360182	ILMN_1673982	110477	0.000865492	0.000358356	-0.110681	0.0162727	0.0508969	0.0302814	-2.17461	0.537382	0.029706	0.591174	0.0855373	0.853908
C11ORF42	3318595	ILMN_1729842	6580167	0.000500504	0.00840027	-0.0594305	-0.0996041	0.0398245	0.0381061	-1.49231	-2.61387	0.13568	0.00914404	0.279431	0.0911967
C11ORF44	3356417	ILMN_1803015	4250386	-0.000130712	0.00321978	0.0140047	-0.0624399	0.029429	0.0386999	0.47588	-1.61344	0.634181	0.107098	0.786121	0.402788
C11ORF45	3397792	ILMN_1680102	7570025	-0.000196762	0.000130052	-0.00333301	0.0139111	0.0910467	0.0429766	-0.0366077	0.323689	0.970799	0.74627	0.987017	0.916205
C11ORF48	3375999	ILMN_1739345	7100280	-0.000215924	0.000527339	0.00356484	0.0123842	0.0253542	0.0189956	0.140602	0.651948	0.88819	0.514648	0.942719	0.813846
C11ORF49	3329537	ILMN_1724532	3060202	-0.00023998	1.97e-05	0.0508839	0.00396445	0.0769688	0.0314769	0.661098	0.125948	0.508579	0.899809	0.687347	0.968298
C11ORF53	3348353	ILMN_1674017	3400484	-0.000167951	1.47e-06	-0.0170459	-0.00113234	0.0531344	0.0329279	-0.320807	-0.0343886	0.74837	0.972577	0.862128	0.990975
C11ORF54	3344861	ILMN_2213297	2470463	0.0105646	9.53e-05	-0.39	-0.00582181	0.0554355	0.0210105	-7.0352	-0.277091	2.26e-12	0.781792	5.47e-11	0.930306
C11ORF57	3348891	ILMN_1728965	870154	0.000352611	0.00217948	0.0978919	0.0281635	0.0575586	0.0212291	1.70073	1.32665	0.0890544	0.185056	0.20324	0.528418
C11ORF63	3353441	ILMN_1709050	1710646	-7.93e-05	0.00132964	0.0638771	0.0279749	0.0662404	0.0270105	0.964322	1.0357	0.334931	0.300697	0.523805	0.664009
C11ORF65	3390143	ILMN_2045800	620246	0.00122652	0.00624445	-0.165689	0.0917199	0.0589381	0.0407494	-2.81123	2.25083	0.00495432	0.0247045	0.0192393	0.174906
C11ORF68	3378007	ILMN_1757847	4050446	0.00276546	0.00508842	-0.208803	-0.0420691	0.0591044	0.0207189	-3.53279	-2.03047	0.000414878	0.0426842	0.00224687	0.244344
C11ORF71	3392044	ILMN_2049693	1230543	0.000577169	2.27e-05	-0.112851	-0.00345364	0.0532283	0.025552	-2.12013	-0.135161	0.0340435	0.892523	0.0954449	0.966239
C11ORF73	3343252	ILMN_1781419	780440	4.72e-05	0.00391413	-0.043007	-0.0363761	0.0433312	0.0204402	-0.992517	-1.77963	0.320993	0.0755683	0.508274	0.337426
C11ORF80	3336486	ILMN_1790637	5690463	0.000295776	0.00072819	0.0798352	-0.0176454	0.0534427	0.0230298	1.49385	-0.766196	0.135279	0.443817	0.278937	0.775071
C11ORF82	3342426	ILMN_1790100	2570019	0.000319805	0.000750815	0.0736484	0.0174526	0.0545807	0.0224321	1.34935	0.778018	0.177286	0.43682	0.339633	0.772582
C11ORF88	3348551	ILMN_1766038	840465	0.00144833	0.000557115	-0.146309	0.0211837	0.052833	0.0316122	-2.76927	0.670112	0.00563866	0.503006	0.021434	0.808379
C11ORF92	3390852	ILMN_1727178	3310739	-7.61e-05	9.02e-06	0.0303276	0.00351597	0.0486027	0.0412498	0.62399	0.0852359	0.532662	0.932098	0.707631	0.980257
C12ORF10	3415937	ILMN_1777765	1260022	0.00347099	0.00633214	0.286283	0.0394138	0.0775158	0.0173882	3.69322	2.26669	0.000223771	0.0237119	0.00129264	0.170482
C12ORF23	3430389	ILMN_1804611	3290379	2.83e-05	0.00822291	-0.0482088	0.062902	0.0443909	0.0243254	-1.08601	2.58586	0.277528	0.00991371	0.462733	0.0960292
C12ORF29	3425108	ILMN_1792671	110240	-2.11e-06	0.0113843	0.0479745	0.0569719	0.0384635	0.0186904	1.24727	3.04819	0.212356	0.0023886	0.387065	0.0353162
C12ORF36	3445252	ILMN_1755414	4120240	8.35e-05	0.000338807	0.0392094	0.0160521	0.0361415	0.0307209	1.08489	0.522513	0.278024	0.601478	0.46331	0.85831
C12ORF39	3407849	ILMN_1763311	1820671	-0.000186602	0.00139254	-0.0175971	0.043903	0.0393222	0.0414197	-0.447512	1.05995	0.654525	0.28953	0.801771	0.654022
C12ORF4	3441215	ILMN_1751898	6420551	-2.24e-05	0.00265054	-0.0593588	-0.0350675	0.054435	0.023963	-1.09045	-1.4634	0.275566	0.143804	0.460309	0.467325
C12ORF40	3411234	ILMN_1722880	3180279	-0.000197911	0.00101043	-0.0276003	0.0383027	0.0979045	0.0424315	-0.281911	0.902693	0.778023	0.366998	0.880861	0.723226
C12ORF43	3474815	ILMN_1737818	50414	-0.000197535	5.31e-06	0.000546806	-0.00148018	0.0645748	0.02263	0.0084678	-0.0654077	0.993244	0.947868	0.997207	0.984373
C12ORF44	3415273	ILMN_1772527	1780367	0.00257377	0.0016956	-0.217725	-0.026694	0.0645197	0.0228188	-3.37456	-1.16982	0.000744928	0.242469	0.00375896	0.606096
C12ORF49	3473331	ILMN_2161556	3170102	-8.88e-05	0.000283316	0.0293945	0.0143152	0.0419292	0.0299609	0.701051	0.477796	0.483303	0.632944	0.663984	0.872152
C12ORF5	3401756	ILMN_1791792	2350762	0.0008436	1.56e-05	0.0817443	0.00250994	0.0406038	0.0224172	2.01322	0.111965	0.0441446	0.910883	0.117764	0.972656
C12ORF50	3464589	ILMN_1715567	4120541	-0.000200701	0.00166731	-0.0024273	-0.0332222	0.0708626	0.0286398	-0.0342536	-1.16	0.972676	0.246441	0.987668	0.61096
C12ORF52	3432641	ILMN_1667857	4900753	-0.000143319	0.00357265	-0.0505285	-0.0366994	0.0691913	0.0215892	-0.730273	-1.6999	0.465257	0.0895928	0.647274	0.369218
C12ORF54	3413495	ILMN_1675616	4570747	1.91e-05	0.00623711	-0.0493922	-0.0640699	0.0513675	0.0284819	-0.961546	-2.2495	0.336324	0.0247895	0.52544	0.175001
C12ORF57	3403077	ILMN_1812191	3130291	0.0082925	0.00566432	-0.270343	0.0246447	0.0439012	0.0115	-6.158	2.14301	7.94e-10	0.0324549	1.3e-08	0.207244
C12ORF61	3459579	ILMN_1773927	3170608	-0.000150086	0.00337448	-0.0342592	-0.0703384	0.0829264	0.0425805	-0.413128	-1.65189	0.67953	0.0990033	0.818589	0.386832
C12ORF65	3435752	ILMN_1667510	2320392	-0.000156318	0.000108483	0.0508885	-0.00572667	0.0585866	0.0193713	0.868604	-0.295627	0.385105	0.767603	0.575176	0.925972
C12ORF66	3459956	ILMN_1736995	5090025	5.06e-05	0.00492364	0.0844581	0.0664186	0.0599308	0.0332569	1.40926	1.99714	0.15882	0.0461952	0.314249	0.254626
C12ORF75	3429857	ILMN_1716382	5810743	-2e-05	0.00136617	0.0295863	0.0133528	0.033202	0.0127187	0.8911	1.04985	0.372918	0.294146	0.564038	0.658888
C12ORF76	3471073	ILMN_1753265	6110215	-0.000104453	0.000257819	0.0245207	0.0107816	0.0589397	0.0236551	0.416031	0.455783	0.677405	0.648687	0.816927	0.877318
C13ORF35	3502149	ILMN_1759486	1980537	-0.000190556	0.000717666	-0.0312894	-0.0316055	0.0539868	0.0415514	-0.579575	-0.760635	0.562227	0.44713	0.73115	0.777216
C14ORF105	3566383	ILMN_2083789	6060189	-0.000110486	2.36e-05	-0.0264778	-0.00525306	0.0651884	0.0380927	-0.406173	-0.137902	0.684633	0.890357	0.821368	0.966239
C14ORF132	3550234	ILMN_1713744	730358	-0.000206325	0.000459618	0.0248688	-0.0158484	0.0569581	0.0260397	0.436615	-0.608625	0.662409	0.54297	0.806918	0.830337
C14ORF142	3577256	ILMN_1685781	610523	0.00184192	0.0116406	0.0844154	0.051772	0.0279013	0.016794	3.02549	3.08276	0.00249478	0.00213111	0.010725	0.0323832
C14ORF166	3535674	ILMN_1696708	3290689	-0.000189715	0.00320811	0.00884615	0.0246843	0.0368953	0.0153271	0.239764	1.6105	0.810523	0.107737	0.901372	0.404309
C14ORF166B	3545183	ILMN_2114190	6020722	0.000335492	0.00011485	0.126838	0.0124166	0.0922799	0.0408199	1.37449	0.304179	0.169352	0.761081	0.329356	0.923071
C14ORF177	3551029	ILMN_1728272	6940044	-0.000194817	0.00063289	-0.00190541	0.0264637	0.055624	0.0370504	-0.0342552	0.714263	0.972675	0.475302	0.987668	0.795229
C14ORF2	3580947	ILMN_1652722	2100341	0.00623904	0.0300692	-0.234085	0.0786892	0.04314	0.015711	-5.42617	5.00854	6.03e-08	6.94e-07	7.16e-07	5.89e-05
C14ORF37	3566495	ILMN_2138745	2690717	-7.05e-05	0.00288463	0.0276531	-0.0384652	0.0446415	0.0251923	0.619448	-1.52686	0.535649	0.127244	0.710621	0.439592
C14ORF39	3567243	ILMN_2185072	7160301	-0.000188262	0.000148297	-0.0216142	0.0153178	0.087681	0.0443156	-0.24651	0.345653	0.805298	0.729707	0.898254	0.910057
C14ORF79	3554523	ILMN_1686082	3180445	0.000173184	0.000746898	-0.0995358	-0.0279341	0.0616341	0.0359983	-1.61495	-0.775984	0.106385	0.438019	0.232698	0.773344
C14ORF93	3557017	ILMN_1724897	4610484	-0.000183797	0.00563863	-0.0167196	-0.0471592	0.0745748	0.0220564	-0.224199	-2.13811	0.822612	0.0328517	0.908556	0.208569
C15ORF26	3604267	ILMN_1686373	4490278	0.00047536	0.00255806	0.0957625	0.0380202	0.059712	0.0264476	1.60374	1.43757	0.108834	0.151001	0.236596	0.479211
C15ORF27	3602569	ILMN_1808956	6580008	-0.000182924	6.61e-06	-0.0065139	0.00229059	0.0802889	0.0314025	-0.0811308	0.072943	0.935341	0.941872	0.971278	0.982369
C15ORF32	3609007	ILMN_1773848	5490243	-0.000198543	0.000737519	-0.00773535	-0.0202841	0.04736	0.0263057	-0.163331	-0.771093	0.870264	0.440911	0.93299	0.774344
C15ORF37	3603840	ILMN_1768855	130376	0.00738441	0.000252843	-0.26002	0.0169292	0.044313	0.037507	-5.8678	0.451362	4.7e-09	0.651868	6.81e-08	0.878341
C15ORF40	3636442	ILMN_1660585	3130133	-0.00013332	0.00128047	0.0131243	0.0222906	0.0534069	0.0219322	0.245742	1.01634	0.805892	0.309817	0.898833	0.673271
C15ORF43	3592172	ILMN_2167858	7380066	-1.61e-05	0.00186441	-0.071587	0.0503235	0.0526304	0.0410203	-1.36018	1.22679	0.173833	0.22031	0.334936	0.575242
C15ORF53	3589290	ILMN_1698363	6400348	-0.000119809	2.46e-05	-0.0373185	0.0041203	0.0466589	0.0292591	-0.799815	0.140821	0.423856	0.888051	0.610502	0.965772
C15ORF57	3619479	ILMN_2413318	5570575	-0.00011468	0.000909174	0.028428	0.0176214	0.0460992	0.0205805	0.616671	0.856222	0.53748	0.392167	0.712224	0.742204
C16ORF11	3642993	ILMN_2185427	1030170	0.00090297	0.000829913	-0.273655	-0.0217565	0.110169	0.0265968	-2.48395	-0.818012	0.0130256	0.413628	0.0437821	0.75656
C16ORF3	3705170	ILMN_1806189	2750008	-0.000180515	0.00011556	-0.00690118	0.0112517	0.0341048	0.0368766	-0.202352	0.305119	0.83965	0.760366	0.916715	0.9227
C16ORF46	3701433	ILMN_1667665	70152	-0.000199595	4.12e-07	-0.00381845	0.000516062	0.0602597	0.0283125	-0.0633667	0.0182273	0.949477	0.985463	0.977784	0.994791
C16ORF52	3652271	ILMN_1717324	60243	-0.000185233	0.00339744	0.0182541	-0.0394291	0.0391246	0.023788	0.466563	-1.65752	0.640833	0.0978601	0.791111	0.384307
C16ORF54	3687232	ILMN_1751061	6290458	0.00334765	6.13e-05	-0.260644	0.00438739	0.0622589	0.0197461	-4.18646	0.22219	2.88e-05	0.82423	0.000201295	0.94751
C16ORF62	3651057	ILMN_1729450	1170719	0.00626688	5.51e-05	0.376048	-0.00587584	0.0694951	0.0278823	5.41114	-0.210738	6.55e-08	0.833153	7.73e-07	0.95116
C16ORF70	3665161	ILMN_1711703	4670520	-5.7e-05	0.00179815	0.0563258	-0.0333624	0.0699574	0.0276924	0.805144	-1.20475	0.420774	0.228705	0.607662	0.586361
C16ORF71	3646366	ILMN_1683370	1090767	-0.000199084	0.00516177	-0.0045673	-0.0842157	0.103429	0.0411784	-0.044159	-2.04514	0.964779	0.0412125	0.984625	0.23933
C16ORF72	3647632	ILMN_1773407	3180450	0.00100787	0.00337843	-0.228476	0.029615	0.0842668	0.0179174	-2.71134	1.65286	0.00672393	0.0988056	0.0248843	0.386659
C16ORF74	3703129	ILMN_1806149	3930152	0.000512186	0.00034201	-0.131155	-0.0146213	0.0771935	0.0278512	-1.69904	-0.524978	0.0893731	0.599764	0.203851	0.857773
C16ORF78	3659691	ILMN_2137003	5360288	0.000151943	0.00127059	-0.09051	-0.0296085	0.0596066	0.0292456	-1.51846	-1.01241	0.128962	0.311691	0.268531	0.674546
C16ORF80	3693511	ILMN_2112599	5360630	-0.000200587	0.00702318	-0.00330483	-0.0456043	0.0460192	0.0190963	-0.0718143	-2.38813	0.942753	0.0171974	0.974285	0.137942
C16ORF82	3654084	ILMN_1795662	1980100	0.000451344	0.000341325	0.134211	0.0209836	0.0723039	0.0400106	1.8562	0.524452	0.0634831	0.60013	0.157304	0.857773
C16ORF87	3690034	ILMN_1690911	1010575	-0.000131967	0.000246266	-0.0118679	0.0105652	0.0352684	0.0237181	-0.336502	0.445451	0.736506	0.656131	0.854088	0.880413
C16ORF89	3678542	ILMN_1676222	6590386	0.000317733	0.000368019	0.154964	-0.0170638	0.0933047	0.0313338	1.66084	-0.544582	0.0968087	0.586214	0.216347	0.85189
C17ORF102	3753275	ILMN_1778382	1570730	-0.000140515	0.00209797	-0.0300212	-0.0341076	0.0463811	0.0262055	-0.647272	-1.30154	0.517485	0.193499	0.695328	0.538988
C17ORF103	3749795	ILMN_1661735	4220079	0.000403843	0.000808148	-0.0636915	0.019248	0.0566191	0.0238453	-1.12491	0.807204	0.26068	0.419822	0.442894	0.7607
C17ORF47	3764581	ILMN_2075221	6180082	-0.000224831	1.73e-05	0.0285311	0.00350769	0.051783	0.0297242	0.550974	0.118008	0.581676	0.906095	0.747424	0.970943
C17ORF49	3708201	ILMN_1763688	2570035	0.00380657	0.00391583	0.181986	-0.032606	0.0441422	0.0183178	4.12273	-1.78002	3.8e-05	0.0755045	0.000260163	0.337349
C17ORF50	3718775	ILMN_1765645	6290286	8.8e-05	0.000153182	-0.080532	0.00950194	0.0720539	0.0270479	-1.11766	0.3513	0.263764	0.725468	0.4467	0.907799
C17ORF53	3722770	ILMN_1776490	4570224	-0.000170808	0.00144829	-0.102763	-0.029299	0.0975518	0.0271037	-1.05342	-1.081	0.292199	0.280069	0.478722	0.645473
C17ORF59	3744254	ILMN_2225746	6400114	0.00420177	0.0184804	-0.221456	-0.0878741	0.0466385	0.0225331	-4.74836	-3.89978	2.11e-06	0.000105512	1.88e-05	0.00327685
C17ORF64	3729501	ILMN_1717579	6370600	3.47e-05	0.00207589	0.0767238	-0.038354	0.0600088	0.0296248	1.27854	-1.29466	0.201117	0.195863	0.372383	0.541958
C17ORF66	3753833	ILMN_1675097	2640504	0.00132607	0.00056327	0.203381	-0.0217828	0.081498	0.032328	2.49554	-0.673806	0.0126084	0.500656	0.0425934	0.806646
C17ORF70	3773980	ILMN_1711823	4540064	-0.000115298	0.0232006	-0.0896695	-0.0852286	0.115204	0.0194513	-0.778352	-4.38164	0.436398	1.36e-05	0.622393	0.000627893
C17ORF74	3708602	ILMN_1810107	6350326	0.000270894	2.2e-05	-0.107789	0.00356189	0.0657906	0.0267547	-1.63837	0.133131	0.101406	0.894128	0.224128	0.966239
C17ORF75	3752611	ILMN_1797155	5900360	0.000707963	4.55e-06	0.0912271	-0.00119763	0.0467355	0.0197791	1.95199	-0.0605504	0.0509947	0.951734	0.13184	0.984826
C17ORF78	3719456	ILMN_1806330	840753	-0.000192889	5.54e-05	-0.00190463	0.00540377	0.0242674	0.02557	-0.078485	0.211333	0.937445	0.832689	0.972065	0.950991
C17ORF82	3730001	ILMN_1783682	2070360	-5.03e-05	0.000287391	-0.041579	-0.0143042	0.0542969	0.0297248	-0.76577	-0.481221	0.443849	0.630509	0.628777	0.87112
C17ORF85	3741668	ILMN_2221076	3180343	0.00176357	0.000542357	0.162476	0.0151612	0.0581521	0.0229308	2.79398	0.661171	0.00522607	0.508719	0.0200938	0.811055
C17ORF99	3736204	ILMN_1911047	6660543	0.00192276	1.29e-05	0.254183	0.00278396	0.079487	0.027278	3.19779	0.102059	0.00139339	0.918739	0.00650283	0.977001
C18ORF21	3784670	ILMN_1805998	450070	0.00010816	0.00645292	0.0405332	0.0475733	0.0406618	0.0207892	0.996837	2.28837	0.318892	0.0224119	0.506077	0.163691
C18ORF25	3787031	ILMN_1801822	1410563	0.00021632	0.000316436	0.0710432	0.00840859	0.0485904	0.016652	1.46208	0.504961	0.143781	0.613744	0.292071	0.863304
C18ORF56	3795850	ILMN_1796074	1450682	-0.000179465	0.000478617	-0.0256255	0.0233532	0.0817602	0.0376007	-0.313423	0.621083	0.753973	0.534746	0.865603	0.825153
C18ORF8	3781734	ILMN_1719097	1470170	0.0271147	0.0108999	0.713216	0.0692569	0.0628672	0.0232267	11.3448	2.98178	1.79e-29	0.00296479	2.87e-27	0.0411113
C19ORF10	3846900	ILMN_1787844	1030458	-7.23e-07	0.00732507	-0.0775305	-0.0380417	0.0652458	0.015595	-1.18828	-2.43934	0.234778	0.0149603	0.412937	0.126329
C19ORF12	3857811	ILMN_2362439	4070307	-0.000197314	0.00124653	0.000376587	0.0339618	0.0538089	0.0338682	0.0069986	1.00276	0.994416	0.31632	0.997515	0.679682
C19ORF18	3872584	ILMN_1785933	6480397	0.000857538	0.000813882	-0.116425	0.0328086	0.0532937	0.0405012	-2.18459	0.810065	0.0289651	0.418177	0.0838811	0.759708
C19ORF24	3815685	ILMN_1678052	10189	0.00084601	0.00233327	-0.0969407	-0.0310117	0.0506232	0.0225905	-1.91495	-1.37278	0.0555559	0.170259	0.141383	0.50742
C19ORF25	3845210	ILMN_1655225	6520113	0.000989398	0.000918163	-0.14586	-0.0181617	0.0697135	0.0211073	-2.09228	-0.860448	0.0364634	0.389835	0.100915	0.740116
C19ORF26	3845081	ILMN_1780504	2490332	0.000488467	0.000215444	-0.18364	0.00822881	0.10973	0.0197505	-1.67356	0.416637	0.0942793	0.677071	0.212017	0.889232
C19ORF33	3832280	ILMN_1717793	630470	-0.000187554	0.00145896	0.0143183	0.0226419	0.0640282	0.0208685	0.223625	1.08498	0.823059	0.278302	0.908727	0.644664
C19ORF40	3829160	ILMN_2173891	4890364	0.00143371	9.09e-06	-0.132592	-0.00215797	0.054752	0.0252131	-2.42168	-0.0855892	0.0154841	0.931817	0.0502919	0.980123
C19ORF43	3851703	ILMN_1784299	1470358	0.00633563	0.00790792	-0.430182	0.0495051	0.0744886	0.0195257	-5.77514	2.53539	8.15e-09	0.0114479	1.13e-07	0.105838
C19ORF44	3823752	ILMN_1801572	6330367	-7.92e-05	0.00168091	-0.0737355	0.0410162	0.0858638	0.035215	-0.858749	1.16473	0.39052	0.244521	0.580714	0.608778
C19ORF45	3818826	ILMN_1755335	6020433	0.000506965	3.2e-05	-0.161416	0.00439304	0.0781416	0.0273422	-2.06569	0.160669	0.0389087	0.8724	0.106678	0.960653
C19ORF47	3862564	ILMN_1735608	4230603	0.00033736	0.000104239	-0.115615	0.00822173	0.0747631	0.0283716	-1.54641	0.289787	0.122067	0.772065	0.257873	0.92705
C19ORF52	3820906	ILMN_1726181	6290253	-4.83e-05	0.00119842	-0.0655664	-0.0234978	0.0560972	0.0238994	-1.1688	-0.983196	0.24254	0.325849	0.423137	0.688132
C19ORF53	3822347	ILMN_1671374	3460184	6.54e-05	0.00732232	0.046836	-0.0433781	0.0498313	0.0177861	0.93989	-2.43888	0.347319	0.0149793	0.537321	0.126401
C19ORF54	3862785	ILMN_1729546	650167	-0.000171303	0.010516	-0.055624	-0.0733446	0.0847014	0.0250481	-0.656707	-2.92816	0.511399	0.00352004	0.689796	0.0469684
C19ORF55	3830825	ILMN_2195397	5870750	0.000190141	0.000836226	0.130545	0.0323386	0.0984283	0.0393836	1.3263	0.82112	0.184801	0.411857	0.349589	0.755039
C19ORF57	3852345	ILMN_1714419	4880040	-0.000144886	4.92e-06	-0.0652137	0.00241702	0.0926278	0.0384087	-0.70404	0.0629291	0.48144	0.949841	0.66214	0.984374
C19ORF59	3819088	ILMN_1762713	1070367	-0.000212018	0.00482333	0.00634937	0.0179807	0.0329438	0.00909689	0.192734	1.97658	0.847175	0.0484801	0.920428	0.262084
C19ORF60	3825225	ILMN_1668752	4050372	0.00793122	2.26e-05	-0.378405	-0.00357217	0.0637437	0.0264572	-5.93635	-0.135017	3.11e-09	0.892637	4.64e-08	0.966239
C19ORF66	3820310	ILMN_1750400	5220204	7.57e-05	0.00423365	-0.0915225	-0.0367178	0.0765615	0.0198347	-1.19541	-1.85119	0.231982	0.064562	0.410001	0.308455
C19ORF70	3847338	ILMN_1765684	4200181	5.11e-05	0.00120517	-0.0553222	-0.0168524	0.0734853	0.0170923	-0.752834	-0.985964	0.451585	0.32449	0.635849	0.687201
C19ORF73	3867693	ILMN_1721628	2480202	-0.000209061	9.69e-06	0.0115727	-0.00331502	0.0480904	0.0375207	0.240644	-0.0883518	0.80984	0.929622	0.900903	0.9793
C1GALT1	2989435	ILMN_1662578	580066	0.00035858	0.00672938	-0.0651417	0.0434106	0.035488	0.0185734	-1.8356	2.33725	0.0664763	0.0197061	0.162846	0.151828
C1ORF105	2367495	ILMN_1714222	1660731	0.000479835	0.00240423	0.0856653	0.0340737	0.0486763	0.0244509	1.7599	1.39355	0.0784856	0.163893	0.185223	0.498145
C1ORF106	2374422	ILMN_1713952	7100021	0.000872364	0.00397549	-0.165583	0.0493655	0.0842176	0.0275233	-1.96613	1.79359	0.049338	0.0733082	0.128518	0.331718
C1ORF111	2441188	ILMN_1710993	6510139	5.77e-05	0.00154036	0.0695908	-0.0472003	0.0551682	0.0423364	1.26143	-1.11489	0.207212	0.26528	0.380105	0.631744
C1ORF112	2366581	ILMN_1727540	940240	3.81e-05	0.00105591	-0.076102	-0.0280256	0.062874	0.0303697	-1.21039	-0.922813	0.226187	0.356421	0.403247	0.71486
C1ORF115	2381249	ILMN_1674817	770564	0.000995516	0.000888323	0.155408	-0.0238522	0.0657065	0.0281829	2.36519	-0.846336	0.0180585	0.397653	0.0570992	0.74649
C1ORF127	2396362	ILMN_1744089	5260661	-0.000134732	0.000113006	0.0917362	-0.00849882	0.0797472	0.0281672	1.15034	-0.301727	0.250059	0.762949	0.430829	0.923881
C1ORF131	2460487	ILMN_1805474	4760692	4.57e-05	0.000200619	0.0622183	0.00697783	0.058599	0.017356	1.06176	0.402043	0.288394	0.687775	0.474881	0.89307
C1ORF158	2321011	ILMN_1733298	6100754	8.88e-05	0.00136754	-0.0715858	-0.0294354	0.0623737	0.0280236	-1.14769	-1.05038	0.25115	0.293904	0.432282	0.658888
C1ORF159	2391005	ILMN_1672811	5570523	0.000298943	6.95e-05	0.164798	0.0073133	0.124796	0.0309138	1.32053	0.236571	0.186716	0.813059	0.352378	0.943248
C1ORF162	2351854	ILMN_1754894	7050719	0.00122352	0.0317124	0.145035	-0.0734603	0.0512081	0.014268	2.83226	-5.14859	0.00464038	3.41e-07	0.0182198	3.37e-05
C1ORF168	2414440	ILMN_1761999	6370358	-8.57e-05	0.000525885	-0.0736545	0.0196335	0.0784449	0.0301569	-0.938933	0.651047	0.34781	0.515229	0.537943	0.814017
C1ORF170	4054681	ILMN_1784186	770181	3e-05	0.000118645	-0.0782975	0.00922727	0.0597845	0.0298457	-1.30966	0.309166	0.19037	0.757287	0.357036	0.921266
C1ORF177	2337327	ILMN_1777437	4900471	4.93e-05	0.00116474	0.0614871	0.0223541	0.0725697	0.023063	0.847283	0.969262	0.396878	0.332748	0.586794	0.694086
C1ORF180	2420511	ILMN_1704674	6860458	-0.000138601	8.72e-05	0.0173445	-0.00730916	0.0290374	0.0275807	0.597317	-0.26501	0.550323	0.79108	0.722138	0.933874
C1ORF198	2460325	ILMN_1657683	1260576	-0.000133939	0.000697529	-0.0223791	0.0156726	0.0611031	0.0209002	-0.366251	0.749879	0.714193	0.453579	0.840679	0.782906
C1ORF21	2371547	ILMN_1797735	2070470	0.00285537	0.00164973	0.137933	-0.0307414	0.0340066	0.0266422	4.05606	-1.15386	5.07e-05	0.24895	0.000338238	0.614678
C1ORF210	2409275	ILMN_2196232	3420435	7.68e-05	3.52e-05	0.0583742	-0.00464567	0.0585806	0.0275843	0.996477	-0.168417	0.319066	0.866303	0.506287	0.958494
C1ORF213	2325113	ILMN_1705419	4640121	-0.000248403	5.71e-05	0.0277832	-0.00667658	0.0717985	0.0311304	0.386961	-0.214471	0.698801	0.830242	0.830031	0.950732
C1ORF228	2334052	ILMN_1663068	1430634	-0.000188725	0.00187541	-0.00990721	-0.0175877	0.0853051	0.0142941	-0.116139	-1.23042	0.907547	0.218953	0.953938	0.573561
C1ORF229	2465546	ILMN_1666825	2850050	-0.000193536	0.000308151	-0.00464305	-0.0131652	0.0543359	0.0264201	-0.0854508	-0.498305	0.931906	0.618425	0.969444	0.865208
C1ORF27	2372141	ILMN_1704222	3120195	0.00117996	5.58e-05	-0.160374	0.00553633	0.0595444	0.0261033	-2.69336	0.212094	0.00709701	0.832096	0.0261127	0.950869
C1ORF35	2459417	ILMN_1790202	5820500	-8.92e-05	7.06e-05	0.0752509	0.00613421	0.0891777	0.0257229	0.843831	0.238472	0.398804	0.811584	0.588519	0.942793
C1ORF43	2436576	ILMN_1660602	4890113	0.000177343	0.00621936	0.0716072	0.0435128	0.0620828	0.0193711	1.15341	2.24627	0.248795	0.0249963	0.429326	0.175843
C1ORF50	2332767	ILMN_1801941	6350292	0.00104031	0.000844909	0.0835482	-0.0234183	0.0361949	0.0283729	2.30829	-0.825376	0.0210234	0.409438	0.0645926	0.753693
C1ORF51	2358136	ILMN_1793543	2510068	0.000153135	0.00163774	0.081245	-0.0423295	0.0775198	0.0368194	1.04806	-1.14965	0.294663	0.250677	0.480603	0.61665
C1ORF52	2420790	ILMN_1742611	990167	-0.000178188	0.00205249	-0.010713	0.024782	0.0650233	0.0192508	-0.164756	1.28732	0.869143	0.198405	0.932523	0.545557
C1ORF63	2402111	ILMN_1760556	2320408	-5.27e-05	0.000407772	0.0566137	-0.0083045	0.0543012	0.0144866	1.04259	-0.573253	0.29719	0.566656	0.48335	0.843197
C1ORF64	2322211	ILMN_2066088	4540468	-0.000198427	0.000777632	-0.000507252	-0.0233576	0.0561638	0.0294993	-0.00903165	-0.791803	0.992794	0.428743	0.9971	0.765398
C1ORF65	2382043	ILMN_1798914	580682	-6.27e-05	7.04e-06	0.0346054	0.00196219	0.068048	0.0260577	0.508544	0.0753018	0.611094	0.939996	0.768222	0.982074
C1ORF87	2415295	ILMN_2097943	7210477	-0.000194657	6.02e-05	-0.0380754	0.00615055	0.0685868	0.0279244	-0.555142	0.220257	0.578822	0.825735	0.745252	0.948532
C1ORF94	2329481	ILMN_1793263	1820731	0.000124411	0.000276101	0.0899278	-0.0179431	0.0679198	0.0380417	1.32403	-0.471671	0.185553	0.637308	0.350787	0.87344
C1ORF95	2383176	ILMN_1664592	2190521	-0.000154422	5.58e-05	-0.0157915	-0.00615684	0.0944021	0.0290427	-0.167279	-0.211993	0.867157	0.832174	0.931127	0.950869
C1QA	2324856	ILMN_1737918	2940685	-0.000100139	5.36e-07	0.0386533	-0.000551794	0.0509606	0.0265472	0.758494	-0.0207854	0.448191	0.983423	0.632549	0.994724
C1QB	2324884	ILMN_1796409	5910019	-0.00020433	0.00267047	0.0157308	-0.0226375	0.0650807	0.0154111	0.241712	-1.46891	0.809013	0.142304	0.900564	0.465505
C1QBP	3742708	ILMN_1668996	7200392	0.00205144	0.00094423	0.229791	0.0162125	0.0761367	0.0185797	3.01814	0.87259	0.002556	0.383184	0.0109569	0.734431
C1QC	2324873	ILMN_1785902	1440341	-6.82e-06	2.42e-05	-0.065211	0.00349485	0.0597267	0.0250079	-1.09182	0.13975	0.274962	0.888898	0.459606	0.965932
C1QL1	3759493	ILMN_1716957	6770121	0.00138646	0.00233811	-0.256493	0.0529326	0.085974	0.0385187	-2.98337	1.37421	0.00286456	0.169816	0.0120819	0.506993
C1QL2	2573016	ILMN_1756236	7210041	-0.000240683	0.00370074	-0.0236922	0.0463379	0.047847	0.0267814	-0.495166	1.73023	0.620504	0.0840282	0.774185	0.358929
C1QTNF1	3736636	ILMN_1694608	6180719	0.00166801	0.000401726	-0.26928	-0.0166667	0.0871544	0.029292	-3.08968	-0.568986	0.00201461	0.569548	0.00890862	0.844995
C1QTNF2	2884623	ILMN_1813307	2810349	-0.000194116	0.0019794	0.00220364	0.0363616	0.0512186	0.0287638	0.0430242	1.26414	0.965684	0.206598	0.984725	0.557434
C1QTNF3	2852766	ILMN_1768925	5220639	0.000464601	0.00108191	0.111796	-0.0379036	0.0731185	0.0405769	1.52897	-0.934116	0.126334	0.350565	0.264384	0.710823
C1QTNF5	3394315	ILMN_1744487	7320204	0.000195933	6.54e-05	-0.103211	-0.00942309	0.072884	0.0410465	-1.4161	-0.229571	0.156807	0.818492	0.311288	0.945765
C1QTNF6	3960005	ILMN_1729288	1010446	-2.14e-05	0.000137644	0.0617628	-0.00941355	0.0874357	0.0282686	0.70638	-0.333004	0.479984	0.739231	0.660626	0.914246
C1QTNF7	2719440	ILMN_1662935	6650280	0.000448702	0.00109431	0.0571195	-0.024823	0.038247	0.0264226	1.49344	-0.939461	0.135385	0.347817	0.279109	0.707146
C1QTNF8	3675620	ILMN_1695740	6270091	0.000222888	0.000202986	-0.0916647	-0.0172977	0.0719496	0.0427728	-1.27401	-0.404408	0.202717	0.686035	0.374482	0.892397
C1R	3442475	ILMN_1677198	5260474	-0.000208792	0.000144007	0.0202747	-0.0132853	0.0889879	0.0390038	0.227837	-0.340616	0.819782	0.733495	0.906891	0.911834
C1RL	3442514	ILMN_1733288	5810424	-0.000157771	0.00342244	0.0236315	-0.0296364	0.0723832	0.0178143	0.326478	-1.66363	0.744077	0.0966313	0.859085	0.382083
C1S	3403168	ILMN_1677603	1300327	-0.000173021	1.07e-05	0.0216	0.00392503	0.0885176	0.0421867	0.244019	0.0930393	0.807226	0.925899	0.899323	0.977883
C20ORF112	3902743	ILMN_1652219	1010725	0.00134372	2.26e-05	0.0793918	-0.00352259	0.032093	0.0261122	2.4738	-0.134902	0.013401	0.892728	0.0446824	0.966239
C20ORF144	3882614	ILMN_1688258	4120762	0.000332282	0.00130164	-0.0514867	0.0428883	0.0315194	0.0418536	-1.63349	1.02472	0.102428	0.305847	0.225954	0.668656
C20ORF166	3913335	ILMN_1789950	4540403	5.33e-05	0.000740707	-0.127031	-0.0339952	0.0859223	0.043992	-1.47844	-0.772759	0.139352	0.439925	0.28514	0.773988
C20ORF173	3903999	ILMN_1786483	4780672	0.000286429	0.000412129	-0.0834037	0.0152674	0.0519904	0.0264917	-1.60421	0.576309	0.10873	0.564591	0.236455	0.842099
C20ORF196	3875108	ILMN_1793002	7160066	0.00030481	0.000210578	0.0640688	-0.00991862	0.0467462	0.02408	1.37057	-0.411903	0.170571	0.680536	0.331086	0.890576
C20ORF197	3891723	ILMN_1691228	1340176	0.00703861	0.00156046	-0.348609	-0.0363504	0.0608645	0.0323935	-5.72762	-1.12215	1.08e-08	0.262181	1.46e-07	0.628184
C20ORF201	3914327	ILMN_1780283	1500546	0.000283296	0.00260465	-0.116694	0.0517621	0.071335	0.0356822	-1.63585	1.45064	0.101933	0.147325	0.225168	0.473198
C20ORF203	3902871	ILMN_1773383	5670240	0.000423846	0.00167727	-0.09994	-0.0347999	0.0654881	0.0299105	-1.52608	-1.16347	0.127053	0.245034	0.265675	0.609801
C20ORF85	3890840	ILMN_1661618	2570228	-0.000202267	0.000528467	0.00374457	0.0196481	0.0408164	0.0301054	0.0917418	0.652645	0.926907	0.514199	0.966113	0.813349
C21ORF119	3918098	ILMN_1728403	3440132	-0.000199906	0.00167511	0.0115397	0.0411832	0.0548383	0.0354197	0.210431	1.16272	0.83334	0.245338	0.913384	0.610254
C21ORF128	3933451	ILMN_1663893	4900040	0.000636106	0.00018456	0.118403	0.00744057	0.0574196	0.0192954	2.06206	0.385613	0.0392533	0.6999	0.107403	0.898106
C21ORF33	3923537	ILMN_1737588	5050376	5.95e-05	0.0004086	-0.0962492	-0.01221	0.0800618	0.0212778	-1.20219	-0.573835	0.229348	0.566263	0.40685	0.843028
C21ORF62	3929450	ILMN_1814369	6110152	0.000117514	0.00103729	0.0379208	0.0326125	0.024978	0.0356565	1.51817	0.914631	0.129034	0.360699	0.268588	0.719162
C21ORF67	3934785	ILMN_1772575	7380167	8.26e-05	0.00152725	-0.128006	-0.0344811	0.0904249	0.0310605	-1.41561	-1.11013	0.156952	0.267324	0.311334	0.634231
C21ORF88	3932397	ILMN_1716682	3310110	8.18e-05	0.000232592	-0.0716632	0.0164905	0.0602965	0.0380928	-1.18851	0.432904	0.234687	0.665217	0.412904	0.884316
C21ORF90	3923811	ILMN_1666773	6900017	-1.6e-05	0.000320304	-0.0469683	0.0201756	0.0352182	0.0397127	-1.33363	0.50804	0.182384	0.611585	0.346371	0.862345
C21ORF91	3926138	ILMN_1698166	6770576	0.00291721	5.73e-05	-0.198345	-0.00528743	0.0498041	0.0246175	-3.9825	-0.214783	6.92e-05	0.829999	0.0004502	0.950711
C22ORF15	3939450	ILMN_1802771	7570133	6.14e-05	0.000326349	0.0908054	-0.0201981	0.0803877	0.0393869	1.12959	-0.512813	0.258702	0.608243	0.440676	0.861379
C22ORF23	3960276	ILMN_1721338	650717	4.41e-06	0.00496928	-0.0763091	-0.0588512	0.0745281	0.0293313	-1.0239	-2.00643	0.305933	0.0451933	0.492188	0.252004
C22ORF26	3963905	ILMN_1673743	5420093	0.00100892	0.00191121	-0.141582	0.0423096	0.062625	0.0340621	-2.26079	1.24213	0.023815	0.214603	0.071528	0.569219
C22ORF31	3956670	ILMN_1757114	3840075	5.37e-05	0.0010527	0.0473338	-0.0319703	0.0427794	0.0346973	1.10646	-0.921405	0.268579	0.357155	0.45226	0.715616
C22ORF34	3965102	ILMN_1717371	3140064	-0.000176919	0.00305832	-0.00641524	0.0256922	0.0526582	0.0163403	-0.121828	1.57232	0.90304	0.116327	0.951109	0.418242
C22ORF43	3954764	ILMN_1766178	5810484	-0.00014351	0.00223513	-0.062271	-0.0359542	0.0500351	0.0267612	-1.24455	-1.34352	0.213357	0.179537	0.388292	0.521432
C2CD2L	3351895	ILMN_1778132	6520364	0.00132327	0.0019836	0.122354	-0.0367551	0.0381523	0.0290442	3.207	-1.26549	0.00134966	0.206117	0.0063208	0.556343
C2CD3	3381702	ILMN_1691757	2470438	0.00216418	5.78e-05	0.244136	-0.00863668	0.0724998	0.0400172	3.3674	-0.215824	0.00076448	0.829187	0.00384955	0.950177
C2CD5	3447129	ILMN_1682572	1240661	0.00454908	0.000149179	-0.320969	0.00470088	0.0710704	0.0135597	-4.51621	0.346679	6.44e-06	0.728936	5.19e-05	0.90919
C2ORF16	2474637	ILMN_1780840	1710707	0.000486317	0.000173268	-0.116975	0.0099834	0.0673228	0.0267202	-1.73753	0.373627	0.0823549	0.708794	0.191855	0.900662
C2ORF27B	2576608	ILMN_1781774	2100730	-0.000190312	0.00102016	0.00622534	-0.0249494	0.0402239	0.0275066	0.154767	-0.907035	0.877011	0.364699	0.93614	0.722801
C2ORF40	2498274	ILMN_1676822	3140113	-0.000253781	0.00246934	0.0201224	-0.0412998	0.033782	0.0292419	0.595654	-1.41235	0.551433	0.15829	0.722886	0.487825
C2ORF42	2558483	ILMN_1661594	5420719	0.00473837	0.00358659	0.242151	-0.0356028	0.0519026	0.0209032	4.66549	-1.70322	3.16e-06	0.0889682	2.71e-05	0.367903
C2ORF43	2543066	ILMN_1660275	6860273	-0.000186304	0.000118881	0.0105547	0.00712429	0.0489568	0.0230207	0.215591	0.309473	0.829315	0.757054	0.911128	0.921266
C2ORF44	2544164	ILMN_1730631	6100154	0.00538723	0.000420995	0.255611	0.0123195	0.0526204	0.0211502	4.85764	0.582479	1.22e-06	0.560431	1.15e-05	0.840159
C2ORF49	2498046	ILMN_1701131	870731	0.00113936	0.00196417	0.105595	0.028992	0.0439431	0.0230231	2.403	1.25926	0.0162971	0.208354	0.052396	0.560417
C2ORF50	2469696	ILMN_1768071	1820487	0.00261093	0.00332892	0.220683	0.0587408	0.0584437	0.0358032	3.77599	1.64066	0.000161204	0.101316	0.000957736	0.391336
C2ORF54	2606959	ILMN_1665471	1050128	-0.000202442	0.00079063	0.0285301	-0.0243361	0.073731	0.0304812	0.386949	-0.798399	0.69881	0.424909	0.830031	0.763358
C2ORF62	2527715	ILMN_1776122	2680564	0.00049807	0.000236271	-0.17225	0.0157293	0.0814474	0.0360504	-2.11487	0.436315	0.0344902	0.662742	0.0964733	0.883641
C2ORF69	2521997	ILMN_1668657	3390220	-0.000197142	9.81e-06	0.0026483	-0.00249599	0.0504706	0.0280839	0.0524721	-0.0888764	0.958155	0.929205	0.982082	0.979262
C2ORF73	2482440	ILMN_1797577	7210164	-0.000196337	0.000757935	0.00134637	-0.0209094	0.0652516	0.0267486	0.0206335	-0.781702	0.983539	0.434653	0.99351	0.770798
C2ORF82	2532626	ILMN_1774265	4280327	-0.000155127	0.000274171	-0.0443434	0.0137805	0.0772028	0.0293191	-0.574376	0.470019	0.565739	0.638487	0.73437	0.873876
C2ORF83	2602368	ILMN_2174948	4590079	7.67e-06	0.00346641	-0.0385073	-0.062562	0.0347533	0.0373654	-1.10802	-1.67433	0.267907	0.0945108	0.451592	0.377931
C3	3848039	ILMN_1762260	4860494	0.000779538	0.00282848	0.244788	0.0570894	0.109066	0.0377605	2.2444	1.51188	0.0248498	0.131013	0.0741739	0.44703
C3ORF14	2627080	ILMN_2224486	6650079	-0.000250954	3.83e-06	0.0238366	0.00113359	0.0377197	0.0204174	0.63194	0.0555209	0.527455	0.955739	0.704009	0.985731
C3ORF17	2688882	ILMN_1689607	4230497	-0.000195106	0.00722197	-0.00238165	0.0865503	0.0659242	0.0357355	-0.0361272	2.42197	0.971182	0.0156886	0.987157	0.130377
C3ORF18	2675457	ILMN_1728581	3370372	-0.000114878	0.000177119	0.0342889	0.0116068	0.0762336	0.0307255	0.449787	0.377757	0.652883	0.705725	0.800819	0.900283
C3ORF22	2693654	ILMN_1653228	3130487	-0.000125418	0.000497884	0.0339502	0.0140853	0.0530996	0.0222352	0.639369	0.633467	0.522612	0.526634	0.700059	0.820632
C3ORF30	2637819	ILMN_1742009	6290075	-0.000113453	0.000105104	-0.0290866	-0.00771769	0.039692	0.0265225	-0.732808	-0.290987	0.46371	0.771147	0.64591	0.926568
C3ORF36	2696109	ILMN_1795936	2760064	-0.000138158	0.000796859	0.0241826	0.0171134	0.042201	0.0213506	0.573033	0.801541	0.566648	0.42309	0.735125	0.762637
C3ORF37	2641577	ILMN_1696597	1570010	-0.000196049	0.000551011	-0.00771763	-0.0187075	0.0552773	0.0280713	-0.139617	-0.666429	0.888968	0.505356	0.942863	0.809299
C3ORF38	2632051	ILMN_2078264	5570577	-0.000167025	0.000351552	0.0278198	0.01197	0.0464322	0.0224893	0.599149	0.532253	0.5491	0.594719	0.72124	0.855889
C3ORF58	2646327	ILMN_1797372	4060131	0.000517036	2.84e-05	-0.0854192	0.00282123	0.0536808	0.0186577	-1.59124	0.15121	0.111618	0.879854	0.241168	0.963489
C3ORF62	2674168	ILMN_1679339	130280	0.000249232	0.000530349	0.052378	-0.0137882	0.0422984	0.0210892	1.2383	-0.653807	0.215664	0.51345	0.390906	0.813126
C3ORF67	2678526	ILMN_1697761	1770167	-4.4e-05	0.00395783	0.0621284	0.0632898	0.0762051	0.0353656	0.815278	1.78958	0.414952	0.073951	0.60243	0.333001
C4BPA	2377165	ILMN_1810752	2000128	-0.000189368	0.0023249	-0.00480373	-0.00841153	0.017083	0.00613842	-0.281199	-1.37031	0.778569	0.171028	0.881082	0.50859
C4ORF19	2723605	ILMN_1795838	670475	-0.00016424	0.00223844	-0.0150833	-0.0397583	0.0491858	0.0295707	-0.306659	-1.34452	0.759116	0.179214	0.868776	0.520871
C4ORF21	2782292	ILMN_1720266	830482	0.000383754	0.000919042	-0.0799554	0.0250834	0.0623343	0.0291376	-1.28269	0.860861	0.199661	0.389608	0.370368	0.739918
C4ORF22	2733392	ILMN_1665714	5550176	0.000686419	0.00103624	0.130931	-0.0269762	0.0555206	0.0295091	2.35825	-0.914165	0.0183994	0.360944	0.0579642	0.719261
C4ORF26	2731782	ILMN_1794239	1820315	-0.000140235	0.000740304	0.0233281	-0.0267463	0.0403578	0.0346208	0.578031	-0.772549	0.563269	0.440049	0.73211	0.773988
C4ORF27	2793310	ILMN_1698677	4780215	0.000395316	0.00444659	0.0382644	0.0436543	0.02635	0.0230074	1.45216	1.8974	0.14652	0.0581844	0.296086	0.291406
C4ORF29	2743029	ILMN_1761963	5810192	0.00112571	0.00364803	0.146697	-0.0347154	0.0587176	0.0202091	2.49835	-1.71781	0.0125087	0.0862717	0.0423383	0.362153
C4ORF3	2783473	ILMN_2051684	1980369	0.00211733	0.00722375	-0.123101	0.0390052	0.0377131	0.0161028	-3.26415	2.42227	0.00110526	0.0156757	0.00530825	0.13036
C4ORF36	2776851	ILMN_2214713	6760019	0.000259419	0.000146203	-0.0828896	0.00890375	0.0586514	0.0259431	-1.41326	0.343203	0.157641	0.731549	0.312328	0.910864
C4ORF40	2730257	ILMN_2231546	4010408	-0.000125813	0.00088544	-0.0247039	0.0359134	0.0474602	0.042503	-0.520519	0.844961	0.602725	0.39842	0.762504	0.747043
C4ORF45	2791593	ILMN_1694131	2450180	-0.000189125	0.00895922	-0.00342799	0.106563	0.0412585	0.0394635	-0.0830855	2.7003	0.933787	0.00709436	0.97043	0.0768077
C5	3223776	ILMN_1746819	1340241	0.00192937	0.00151042	0.185647	0.0279233	0.0621737	0.0252933	2.98595	1.10398	0.0028406	0.26998	0.0119934	0.636914
C5AR1	3837257	ILMN_1689836	6450092	0.00422986	0.0127818	-0.204944	-0.0433884	0.0469659	0.0134227	-4.36367	-3.23248	1.3e-05	0.00128451	9.83e-05	0.0223752
C5ORF20	2876543	ILMN_1701911	2000162	-7.22e-05	0.0189132	0.0551566	-0.0937036	0.0683697	0.0237454	0.80674	-3.94618	0.419854	8.74e-05	0.607134	0.00282351
C5ORF27	2821041	ILMN_1662880	4920097	-0.000184229	0.00347025	-0.0134613	0.0449903	0.0685539	0.0268557	-0.196361	1.67526	0.844335	0.0943281	0.919052	0.377931
C5ORF28	2855578	ILMN_2150465	240576	0.00301371	0.0121685	-0.200577	-0.0303345	0.0512451	0.0096213	-3.91407	-3.15285	9.19e-05	0.00168557	0.000579485	0.0274475
C5ORF34	2855614	ILMN_1662184	770102	-8e-05	0.00255664	-0.049523	0.0402486	0.0663129	0.0280055	-0.746809	1.43717	0.455214	0.151115	0.63928	0.479327
C5ORF38	2799509	ILMN_1695852	6110309	0.000110867	0.000452526	-0.0896937	0.0252358	0.067322	0.0417875	-1.33231	0.603908	0.182819	0.5461	0.347126	0.830932
C5ORF42	2853642	ILMN_1677303	3440484	0.000477605	0.00186443	0.136179	0.0319132	0.0659505	0.0260134	2.06486	1.2268	0.0389874	0.220308	0.106845	0.575242
C5ORF46	2880463	ILMN_1718866	1450161	-6.26e-05	0.00294571	0.0476102	0.0453957	0.0506124	0.0294204	0.940683	1.543	0.346912	0.123281	0.537244	0.432035
C5ORF48	2827177	ILMN_1806520	6520746	0.000344772	0.000421902	0.0503213	0.0248868	0.0385458	0.0426798	1.30549	0.583106	0.191785	0.560009	0.35913	0.839936
C5ORF51	2807862	ILMN_1783023	3180132	0.00129822	0.00597361	0.198833	-0.0463184	0.0680173	0.021043	2.92327	-2.20113	0.00347919	0.0280509	0.0142745	0.19086
C5ORF58	2840238	ILMN_1715644	3140639	-0.000166432	0.000392793	-0.0278251	-0.0141436	0.0475203	0.0251387	-0.585541	-0.562622	0.55821	0.573872	0.728266	0.846818
C6	2854915	ILMN_1688242	6520040	0.00022571	4.73e-05	-0.119703	0.00527807	0.0832204	0.0270379	-1.43838	0.19521	0.150388	0.845285	0.301627	0.953111
C6ORF1	2951057	ILMN_2372199	520044	0.000330741	0.00233791	-0.122834	-0.0513034	0.0787931	0.0373348	-1.55895	-1.37415	0.119072	0.169835	0.253367	0.506993
C6ORF106	2951221	ILMN_1704253	7320110	0.00698025	0.000181369	0.407605	-0.00774825	0.0705199	0.0202694	5.78	-0.382264	7.92e-09	0.702381	1.1e-07	0.899436
C6ORF118	2984230	ILMN_1753658	2630121	0.000527299	2.05e-05	-0.141423	0.00376999	0.0705336	0.0293441	-2.00504	0.128475	0.0450123	0.89781	0.119576	0.967502
C6ORF201	2892800	ILMN_1651624	70187	0.000381383	0.000692582	0.126035	0.0284573	0.0647619	0.0380846	1.94614	0.747213	0.0516939	0.455185	0.133272	0.783456
C6ORF203	2919927	ILMN_1778951	3170564	-9.07e-05	0.00123043	-0.0259623	-0.0239935	0.0341606	0.0240836	-0.760008	-0.996258	0.447285	0.319467	0.632011	0.682853
C6ORF211	2931683	ILMN_1798108	2750129	0.00522988	0.00555714	-0.276496	0.0533044	0.0494048	0.0251139	-5.59655	2.12251	2.3e-08	0.034144	2.96e-07	0.213955
C6ORF57	2912860	ILMN_1728057	2570068	-0.000158146	0.00186645	-0.010969	0.037091	0.0527303	0.0302176	-0.208022	1.22747	0.835221	0.220058	0.914031	0.57511
C6ORF58	2925013	ILMN_1754920	3870593	0.000135116	0.000618276	-0.104874	-0.0188578	0.0667542	0.0267122	-1.57104	-0.705962	0.116235	0.480445	0.248958	0.796117
C6ORF62	2945677	ILMN_1653797	5860754	0.0194093	0.0208699	0.57	0.0693776	0.0577225	0.0167173	9.87483	4.15004	8.6e-23	3.73e-05	7.51e-21	0.00146405
C6ORF89	2905256	ILMN_1665117	3310181	-0.000189205	0.000372174	0.00811899	-0.0131033	0.0676344	0.0239265	0.120042	-0.547649	0.904454	0.584107	0.952126	0.851127
C7	2807716	ILMN_1687848	4920221	-4.12e-05	0.00149925	-0.0683925	0.0465177	0.0788354	0.0422933	-0.867535	1.09988	0.38569	0.271759	0.575835	0.638663
C7ORF10	2998638	ILMN_1763011	2470102	0.00861874	0.000904237	-0.367485	0.028618	0.0563474	0.0335148	-6.52177	0.853891	7.63e-11	0.393456	1.47e-09	0.743126
C7ORF26	2989141	ILMN_1730048	3780148	0.00404471	0.00364971	-0.231867	-0.0364345	0.0557969	0.021205	-4.15556	-1.71821	3.3e-05	0.0861992	0.000228309	0.362153
C7ORF31	3042012	ILMN_1706101	1470687	0.000207196	0.00611064	0.0966595	-0.0596122	0.0672564	0.026775	1.43718	-2.22641	0.150729	0.0263028	0.302109	0.181361
C7ORF33	3030248	ILMN_1779225	6550670	-0.000198491	0.0004837	0.00227725	0.0244999	0.0469	0.0392391	0.0485553	0.624374	0.961276	0.532584	0.983141	0.824043
C7ORF34	3028911	ILMN_1700588	1430386	-3.8e-05	0.000209524	-0.0183928	0.0117535	0.0223504	0.0286063	-0.822928	0.410871	0.410588	0.681293	0.598953	0.891134
C7ORF60	3068519	ILMN_1658210	2940521	0.00437393	1.23e-05	-0.265744	0.00407073	0.0555015	0.0409038	-4.78804	0.0995197	1.73e-06	0.920754	1.57e-05	0.977072
C7ORF61	3064024	ILMN_2226691	1980452	-9.08e-05	3.75e-05	-0.0350089	0.00480383	0.0683464	0.027639	-0.512227	0.173806	0.608514	0.862068	0.766687	0.956971
C7ORF69	3000905	ILMN_1695301	4860521	-7.34e-05	0.00217247	0.0150505	-0.0557958	0.0285351	0.0421257	0.527438	-1.32451	0.597912	0.185765	0.759095	0.529358
C7ORF76	3062302	ILMN_1697691	2490692	-0.000215049	0.00052184	-0.0184042	0.0197089	0.0591907	0.0303898	-0.31093	0.648537	0.755867	0.516849	0.866841	0.814654
C8A	2337786	ILMN_1710606	6450403	0.000369653	0.000453104	0.148516	0.0257412	0.0833541	0.0425972	1.78174	0.604294	0.0748513	0.545843	0.178464	0.830932
C8B	2414505	ILMN_1731293	5260551	-0.000155893	0.000151813	0.0448211	0.00908855	0.0756543	0.0259876	0.592446	0.349726	0.553578	0.726649	0.724359	0.908522
C8G	3194969	ILMN_1737242	2000072	-0.000188134	0.00146098	-0.0413039	-0.0312558	0.0774082	0.0287878	-0.533586	-1.08573	0.593651	0.27797	0.756024	0.644265
C8ORF22	3097580	ILMN_1811735	2940414	0.00040624	0.00355611	0.119971	-0.0500675	0.0587717	0.029522	2.04131	-1.69594	0.0412717	0.0903396	0.111959	0.37027
C8ORF31	3119376	ILMN_1790751	2450142	0.00135838	0.000518343	0.145927	-0.0178587	0.0518759	0.0276297	2.813	-0.646359	0.00492717	0.518258	0.0191462	0.815701
C8ORF33	3121023	ILMN_1706275	6350671	-0.000221543	0.000802114	0.0197093	0.018054	0.0743439	0.0224501	0.26511	0.804182	0.790936	0.421564	0.888685	0.761239
C8ORF37	3145240	ILMN_1676797	4280470	0.000141604	0.00316647	-0.0506989	-0.047476	0.0367569	0.029673	-1.3793	-1.59998	0.167862	0.110053	0.327091	0.408234
C8ORF4	3095313	ILMN_1656369	5570731	-0.000227395	6.63e-05	-0.0177668	-0.00847336	0.0416333	0.0366703	-0.426744	-0.231069	0.669584	0.817329	0.811726	0.945093
C8ORF46	3101681	ILMN_1657149	4570341	-4.07e-05	0.00175254	0.0408559	-0.0394128	0.0653235	0.0331383	0.62544	-1.18934	0.531711	0.234707	0.707095	0.595414
C8ORF47	3108648	ILMN_2135709	2060338	-0.000196453	0.000756091	-0.00469148	0.0309873	0.0578036	0.0396892	-0.0811624	0.78075	0.935316	0.435213	0.971278	0.771222
C8ORF48	3086915	ILMN_1784408	5860392	4.37e-05	0.000346456	0.050034	0.0109811	0.0482949	0.0207826	1.03601	0.52838	0.300247	0.597402	0.486746	0.85699
C8ORF58	3089569	ILMN_1764320	1710386	0.000113142	0.00118	0.0927956	0.027956	0.0651249	0.0286552	1.42489	0.9756	0.154252	0.329598	0.307534	0.691328
C8ORF59	3142932	ILMN_1653205	1510452	0.00436337	0.0137575	-0.20099	0.0499911	0.0411868	0.0148983	-4.87997	3.35549	1.09e-06	0.000834814	1.03e-05	0.0160183
C8ORF86	3132124	ILMN_1801725	7320601	-0.000194591	0.000662604	-0.0166941	0.0203612	0.0495131	0.0278596	-0.337166	0.73085	0.736006	0.465114	0.853761	0.788418
C9	2854409	ILMN_1767831	3420521	-0.0001886	2.23e-05	0.00600689	-0.00548871	0.0211485	0.0409383	0.284033	-0.134073	0.776396	0.893383	0.879614	0.966239
C9ORF114	3226709	ILMN_1803317	770692	-0.000124669	0.0122523	-0.0557239	-0.0643966	0.095207	0.0203539	-0.585292	-3.16385	0.558378	0.00162406	0.728266	0.026662
C9ORF116	3229449	ILMN_1723709	2120161	4.88e-05	0.0097861	-0.0605515	0.106795	0.0687132	0.0378233	-0.881222	2.82351	0.37824	0.00488444	0.569083	0.0595121
C9ORF123	3198289	ILMN_1769409	70753	0.00461682	0.00188779	-0.176652	0.0233841	0.0366339	0.0189425	-4.82209	1.23448	1.46e-06	0.217437	1.35e-05	0.571954
C9ORF131	3167684	ILMN_2365667	4570674	0.00189904	3.11e-05	-0.166056	0.0067681	0.0601482	0.042739	-2.76078	0.158359	0.00578715	0.874219	0.0218811	0.961163
C9ORF139	3195102	ILMN_1769538	1740615	-2.46e-05	0.00024233	-0.0442671	0.0171319	0.0631088	0.0387708	-0.701441	0.441876	0.48306	0.658715	0.663801	0.882044
C9ORF142	3195083	ILMN_1761138	4180445	0.0014333	0.0161347	-0.140458	-0.057375	0.0577448	0.0157671	-2.4324	-3.63889	0.0150338	0.000293869	0.0491073	0.00709644
C9ORF156	3216931	ILMN_1700028	3440446	0.00495817	0.000299659	-0.287426	0.0114838	0.0604321	0.0233701	-4.75618	0.491388	2.03e-06	0.623305	1.81e-05	0.867851
C9ORF16	3190210	ILMN_1782618	1170019	-0.000208392	0.000333489	-0.020834	0.0100224	0.0742533	0.0193335	-0.28058	0.518394	0.779044	0.604347	0.881374	0.860163
C9ORF163	3194395	ILMN_1719280	1940239	-0.000188357	0.00118785	-0.0250802	0.0381984	0.0350828	0.039024	-0.714886	0.978845	0.474713	0.327993	0.656141	0.689576
C9ORF170	3177863	ILMN_1701645	3180370	-5.6e-05	0.000838354	-0.0185959	0.0224187	0.0341775	0.0272679	-0.544098	0.822165	0.586398	0.411262	0.751153	0.754523
C9ORF171	3192434	ILMN_1663665	6270246	0.00121885	0.00610311	-0.144909	-0.0515995	0.0619093	0.0231905	-2.34067	-2.22503	0.0192879	0.0263959	0.0602279	0.181754
C9ORF37	3231186	ILMN_1799320	4200204	0.00268739	0.00739158	-0.164359	-0.0664245	0.0475199	0.0271067	-3.45873	-2.45048	0.000547209	0.014509	0.00287816	0.123383
C9ORF40	3210108	ILMN_1711799	4810139	0.0011978	0.00911049	0.163193	0.0675994	0.0584731	0.0248231	2.79091	2.72324	0.00527583	0.00662488	0.0202658	0.0730373
C9ORF41	3210130	ILMN_2077160	7040086	7.78e-05	4.86e-06	0.0720847	0.00188669	0.0595518	0.0301451	1.21045	0.0625871	0.226162	0.950113	0.403247	0.984374
C9ORF43	3185618	ILMN_1796499	3290491	-0.000198362	0.00329058	-0.0122105	0.062135	0.0635665	0.0380928	-0.192091	1.63115	0.847679	0.103307	0.920709	0.395286
C9ORF50	3226975	ILMN_1701873	3840048	-4.27e-05	7.83e-05	-0.0727599	0.00636894	0.0781436	0.025351	-0.931104	0.25123	0.351844	0.80171	0.542233	0.939195
C9ORF53	3164999	ILMN_1687924	1450224	0.000475878	1.05e-05	-0.0779831	0.00274277	0.0427981	0.0298506	-1.82212	0.0918832	0.0684967	0.926817	0.166345	0.97833
C9ORF62	3193848	ILMN_1815635	1820220	-0.000179021	0.00964365	-0.0393	0.0530072	0.0824881	0.0189132	-0.476432	2.80266	0.633787	0.00520794	0.785939	0.0624085
C9ORF64	3212277	ILMN_1777318	4920215	0.000309216	0.000222255	-0.0620056	-0.0104205	0.0412104	0.0246246	-1.50461	-0.423173	0.132486	0.672299	0.274509	0.887339
C9ORF66	3196034	ILMN_1717248	3130139	0.000150992	0.000777663	0.0583869	-0.0196363	0.0466885	0.024799	1.25056	-0.791819	0.211152	0.428733	0.385513	0.765398
C9ORF78	3227121	ILMN_1697166	3890524	0.0226562	0.0446048	0.257026	0.0492572	0.0240062	0.0080048	10.7067	6.15346	1.82e-26	1.27e-09	2.26e-24	3.4e-07
C9ORF85	3174429	ILMN_1806758	3310274	2.07e-05	0.0009967	0.0428614	0.025243	0.0337239	0.0281562	1.27095	0.896534	0.203805	0.370274	0.375685	0.725245
C9ORF89	3179669	ILMN_1659189	5090176	0.0117965	0.000454747	-0.513962	-0.0111978	0.0693508	0.0184969	-7.41105	-0.605389	1.46e-13	0.545116	4.16e-12	0.830932
C9ORF9	3192580	ILMN_1813837	5860709	3.29e-05	0.00622916	-0.0667332	0.0658794	0.070277	0.0293051	-0.949573	2.24805	0.342375	0.0248819	0.532279	0.175338
C9ORF91	3186207	ILMN_1803652	5720131	2.65e-05	0.00886109	-0.0670622	-0.0497259	0.0653258	0.0185177	-1.02658	-2.68532	0.304667	0.00741695	0.491563	0.0792425
C9ORF96	3192912	ILMN_1745713	1570301	-1.38e-05	0.00367559	-0.0268858	-0.0437235	0.0222231	0.0253571	-1.20982	-1.72431	0.226406	0.0850908	0.403446	0.360636
CA1	3142967	ILMN_1652431	2190139	0.0179285	0.059939	0.203059	0.0255804	0.0213353	0.00355276	9.51753	7.20015	2.67e-21	1.55e-12	1.96e-19	2.2e-09
CA12	3628498	ILMN_2382942	3830075	0.00100556	7.73e-06	0.202048	-0.00344306	0.0847091	0.0436301	2.3852	-0.0789147	0.0171063	0.937123	0.0545899	0.981761
CA13	3105506	ILMN_1802414	3130703	0.000241608	0.00443226	0.11414	0.0491798	0.0511188	0.0259617	2.23284	1.89432	0.0256029	0.0585921	0.0760224	0.2925
CA14	2358092	ILMN_1742358	4200400	9.36e-05	7.51e-05	0.0834054	-0.0087232	0.0555755	0.0354678	1.50076	-0.245947	0.13348	0.805795	0.275796	0.940524
CA2	3105600	ILMN_2199439	2060674	0.0123493	0.0108845	0.228156	0.0284529	0.0293897	0.00954904	7.76313	2.97966	9.96e-15	0.00298517	3.35e-13	0.0412988
CA4	3729419	ILMN_1695157	6380672	0.00072309	0.000226216	-0.151046	0.00454171	0.0752543	0.0106381	-2.00714	0.426927	0.0447879	0.669563	0.119085	0.886522
CA5A	3703944	ILMN_1731292	840521	-0.00020293	3.74e-05	-0.0135481	0.00671624	0.0445145	0.0387059	-0.304351	0.17352	0.760873	0.862293	0.869596	0.957132
CA5B	3969855	ILMN_1672807	1690044	0.00755784	4.3e-06	0.289913	-0.00112817	0.0481107	0.0191735	6.02595	-0.0588404	1.8e-09	0.953096	2.79e-08	0.985223
CA6	2319135	ILMN_1708790	2340603	0.0017339	0.00915571	0.180275	0.0829642	0.0613875	0.0303891	2.93668	2.73006	0.0033325	0.00649078	0.0137806	0.0717558
CA7	3664924	ILMN_1784626	4180528	-0.000158577	0.00140208	-0.0579122	-0.0440846	0.085909	0.0414491	-0.674111	-1.06358	0.500272	0.287882	0.678936	0.651819
CA8	3137120	ILMN_1696615	1850097	0.0140549	0.00348537	-0.358709	-0.0618256	0.0437107	0.0368247	-8.20643	-1.67892	2.87e-16	0.0936122	1.13e-14	0.376637
CAAP1	3202136	ILMN_1755222	380348	-0.000197925	2.42e-05	0.00883378	0.00423732	0.0676328	0.0303463	0.130614	0.139632	0.896086	0.888991	0.946763	0.965946
CAB39	2531522	ILMN_1765858	7000017	1.57e-05	0.000498762	-0.0481423	0.00872861	0.0656617	0.0137669	-0.733187	0.634027	0.463478	0.52627	0.645804	0.820491
CAB39L	3513752	ILMN_1660815	2360333	-0.000160338	0.000756396	-0.0110905	0.0244064	0.0444068	0.0312539	-0.249748	0.780907	0.802793	0.43512	0.896871	0.771195
CABLES1	3781531	ILMN_1653001	4050411	0.000553079	0.00195049	-0.0996164	0.0421404	0.050326	0.0335818	-1.97942	1.25486	0.0478228	0.209948	0.125357	0.56282
CABP1	3434490	ILMN_1755428	2140112	-0.000198012	7.09e-05	0.00848591	-0.00937777	0.0728125	0.0392295	0.116545	-0.239049	0.907226	0.811137	0.953867	0.942455
CABP2	3378957	ILMN_2398815	1440008	-0.000134483	0.000433396	-0.0386544	-0.0186623	0.0615631	0.0315776	-0.627883	-0.590999	0.530109	0.554711	0.705797	0.835951
CABP5	3866831	ILMN_1676973	2230278	0.000189814	0.0116909	-0.0154993	0.0563911	0.0134149	0.0182525	-1.15537	3.08951	0.247992	0.00208394	0.428627	0.0319665
CACNA1A	3852133	ILMN_2340815	6110019	0.00114733	0.000535843	-0.393936	0.0194395	0.156081	0.0295799	-2.52391	0.657187	0.0116361	0.511276	0.039879	0.811734
CACNA1C	3401086	ILMN_1861819	3890162	-0.000201694	0.000254285	-0.0193655	-0.0122325	0.0495794	0.0270243	-0.390596	-0.452648	0.696113	0.650942	0.828542	0.87788
CACNA1F	4007919	ILMN_1659138	1850528	0.000187537	0.000113896	-0.147671	-0.0129732	0.145558	0.042828	-1.01452	-0.302914	0.310383	0.762045	0.497158	0.923343
CACNA1H	3643580	ILMN_2397188	7050414	0.000108084	0.00277192	-0.192139	0.0455604	0.156111	0.0304418	-1.23078	1.49664	0.218461	0.134935	0.394422	0.453548
CACNA1S	2450568	ILMN_1667980	4210056	-0.00010754	0.000140151	-0.122679	0.00688901	0.134155	0.0205016	-0.91446	0.336024	0.360519	0.736953	0.551212	0.913268
CACNA2D1	3058991	ILMN_1768533	6840707	-0.000160273	0.000391637	-0.0440173	-0.0180887	0.113348	0.0321982	-0.388339	-0.561792	0.697782	0.574436	0.829601	0.846818
CACNA2D2	2675315	ILMN_2355274	4570286	-0.000198328	2.85e-06	-0.00113757	0.00204158	0.0756935	0.0426361	-0.0150287	0.0478839	0.98801	0.961822	0.995062	0.988314
CACNA2D4	3440066	ILMN_2404493	4640397	9.93e-05	0.00534689	-0.157293	-0.0602898	0.135761	0.0289616	-1.15861	-2.08172	0.24667	0.0377296	0.427251	0.227093
CACNG1	3732145	ILMN_1724306	460161	0.00110121	0.00777376	-0.157059	0.0678179	0.0695717	0.0269804	-2.25751	2.51359	0.024019	0.0121733	0.072069	0.110292
CACNG2	3959787	ILMN_1769492	6580112	0.00186728	0.000844433	-0.128845	-0.0353494	0.0404497	0.0428404	-3.18532	-0.825143	0.00145474	0.40957	0.00671892	0.753693
CACNG3	3653266	ILMN_1768758	5220576	0.000319696	0.000117993	-0.10384	0.0120363	0.062604	0.0390389	-1.65868	0.308315	0.0972419	0.757934	0.216956	0.921266
CACNG4	3732092	ILMN_1702149	5090767	-0.000137528	0.000391506	0.0433869	0.0160561	0.074075	0.0285849	0.585716	0.561698	0.558093	0.574501	0.728266	0.846818
CACNG6	3841184	ILMN_1809676	4830167	0.00178671	6.88e-05	-0.2136	-0.00637433	0.073615	0.0270725	-2.90159	-0.235454	0.00372885	0.813925	0.0151493	0.943248
CACNG7	3841134	ILMN_1669816	4390364	-0.0001758	0.0036253	-0.0345815	0.0652689	0.0543586	0.0381148	-0.636173	1.71243	0.524693	0.087259	0.701259	0.364083
CACUL1	3309124	ILMN_1792270	4070598	0.00825778	7.22e-05	-0.518325	-0.0069357	0.080169	0.028754	-6.46541	-0.241208	1.11e-10	0.809464	2.09e-09	0.941627
CAD	2474341	ILMN_1810992	3360402	0.00129498	0.00551452	-0.313774	-0.0527422	0.111806	0.0249454	-2.80641	-2.1143	0.00502894	0.0348411	0.0194726	0.216633
CADM2	2631556	ILMN_1664118	5820730	-0.000169571	0.00957086	0.0175079	0.0483116	0.0401945	0.0173039	0.43558	2.79194	0.66316	0.00538156	0.807588	0.0636345
CADM3	2362469	ILMN_1701827	3450446	0.000589229	0.000325122	-0.179526	0.0136793	0.103055	0.0267253	-1.74205	0.511848	0.0815606	0.608918	0.190392	0.861379
CADM4	3864519	ILMN_1812096	6420019	0.00352995	0.000396281	-0.351069	0.0189186	0.0822316	0.0334775	-4.26927	0.565115	2e-05	0.572176	0.000143848	0.846082
CADPS	2679406	ILMN_1688188	7610592	-0.000189754	9.36e-05	0.0353962	0.00824205	0.102252	0.0300108	0.346167	0.274636	0.729232	0.783676	0.849308	0.930592
CADPS2	3070309	ILMN_1801370	990494	-0.000248402	0.00201167	-0.0492742	0.0486875	0.10246	0.0382034	-0.480912	1.27443	0.6306	0.202932	0.783038	0.551497
CALB1	3144033	ILMN_1760199	4640240	0.000248991	0.000101132	-0.0476761	0.0121317	0.0442836	0.0425027	-1.07661	0.285434	0.281706	0.775395	0.467377	0.928063
CALB2	3667508	ILMN_2383807	4230706	-0.000101361	2.39e-05	-0.0374077	-0.00296534	0.0718665	0.0213897	-0.520517	-0.138634	0.602726	0.889779	0.762504	0.966162
CALCA	3364127	ILMN_1702566	7650386	0.0016276	0.00142368	0.197711	-0.032057	0.0597153	0.0299106	3.3109	-1.07176	0.000936505	0.284196	0.00458549	0.649703
CALCB	3321592	ILMN_2109371	2230053	-0.000152434	4.66e-05	-0.0171649	-0.00609484	0.0432073	0.0314644	-0.397269	-0.193706	0.691186	0.846462	0.825223	0.953526
CALCOCO2	3725392	ILMN_1755504	5820646	0.00702798	0.00134979	0.325206	-0.0198733	0.05688	0.0190443	5.71741	-1.04353	1.14e-08	0.297061	1.54e-07	0.660991
CALCR	3061538	ILMN_1710219	110239	0.000283673	0.00373727	-0.147498	0.0650757	0.0854357	0.037426	-1.72642	1.73878	0.0843328	0.0825105	0.195538	0.35509
CALCRL	2591367	ILMN_1758281	990300	0.00225281	0.000466222	0.139555	0.0237268	0.0393304	0.038707	3.54827	0.612983	0.000391306	0.540086	0.00213166	0.828837
CALHM1	3304785	ILMN_1679130	5340520	-0.000187879	4.93e-06	-0.00459404	-0.00174945	0.0830634	0.0277614	-0.0553077	-0.0630175	0.955896	0.949771	0.980802	0.984374
CALHM3	3304797	ILMN_1661022	6180450	-0.000221604	3.08e-05	0.0205929	0.00453191	0.0525976	0.0287928	0.391517	0.157397	0.695431	0.874977	0.828058	0.961639
CALM2	2551924	ILMN_1687858	7100711	0.00211222	0.00143387	-0.137609	0.0170801	0.045244	0.0158797	-3.04147	1.07559	0.00236633	0.282478	0.010268	0.64786
CALM3	3836841	ILMN_1666385	2750184	-0.000135999	0.00447626	-0.0846677	-0.0308271	0.0875218	0.0161928	-0.96739	-1.90375	0.333395	0.0573505	0.522285	0.288548
CALML3	3233242	ILMN_1733333	2320600	-8.79e-05	0.000155276	-0.0501748	0.0136456	0.0609816	0.0385804	-0.822787	0.353694	0.410668	0.723674	0.598953	0.906862
CALML4	3630668	ILMN_1717757	1990224	-0.000149906	0.00692651	0.0164902	0.0861431	0.0545827	0.0363242	0.302114	2.37151	0.762578	0.0179843	0.870278	0.142385
CALML6	2316218	ILMN_1739162	2600521	-6.59e-05	0.0121109	-0.0215545	0.115007	0.0286748	0.0365649	-0.751687	3.14528	0.452274	0.0017292	0.636374	0.0278568
CALN1	3055466	ILMN_1778121	4780113	0.000213073	0.00621464	0.110813	0.0384137	0.0746358	0.0171076	1.48471	2.24541	0.137682	0.0250515	0.282588	0.175935
CALR	3822049	ILMN_1736256	2760370	0.00278682	4.26e-05	0.248145	-0.00279598	0.0618823	0.0150846	4.00995	-0.185353	6.16e-05	0.853006	0.000404134	0.954631
CALU	3023060	ILMN_1727194	940431	0.00242989	9.99e-05	0.183069	-0.00618129	0.0550768	0.0217913	3.32389	-0.283659	0.000894052	0.776755	0.00440087	0.928549
CAMK1	2662331	ILMN_2140990	4610338	0.00315927	0.00551527	0.308788	-0.0315423	0.0777099	0.0149175	3.9736	-2.11445	7.18e-05	0.0348287	0.000465795	0.216633
CAMK1D	3235516	ILMN_2280721	4780452	4.17e-05	1.28e-05	0.0713726	-0.00298343	0.0477721	0.0293452	1.49402	-0.101667	0.135232	0.91905	0.278937	0.977001
CAMK2B	3048517	ILMN_2315208	1710131	4.52e-05	0.000467916	-0.0966639	0.0234824	0.101808	0.038239	-0.949473	0.614097	0.342425	0.53935	0.532279	0.828236
CAMK2D	2782545	ILMN_1658818	6480050	0.00560599	0.000420501	0.290074	0.0235945	0.0533347	0.0405309	5.43876	0.582137	5.62e-08	0.560661	6.72e-07	0.840346
CAMK2N1	2400177	ILMN_1794863	4060008	7.36e-05	0.00249983	0.0423786	-0.0248257	0.0388881	0.0174698	1.08976	-1.42107	0.275872	0.15574	0.460743	0.484359
CAMK2N2	2708429	ILMN_1660633	2940142	-0.000201555	0.00316187	-0.00365775	-0.0641041	0.068442	0.0400949	-0.0534432	-1.59881	0.957381	0.110312	0.981741	0.408627
CAMK4	2823880	ILMN_2166582	6450433	0.000324612	0.00129419	0.0600832	0.0293531	0.0382365	0.0287274	1.57136	1.02178	0.116162	0.307237	0.248934	0.669718
CAMKMT	2479746	ILMN_1738099	4120356	-0.000115506	0.000105097	-0.0429699	-0.00741746	0.0576698	0.0254917	-0.745102	-0.290976	0.456245	0.771156	0.639719	0.926568
CAMKV	2674845	ILMN_1667381	5310343	0.000703642	2.23e-07	0.159249	-0.000451855	0.0908109	0.0337152	1.75363	-0.0134021	0.079554	0.989311	0.186911	0.996006
CAMLG	2829463	ILMN_1714599	6660092	-0.00019799	0.0227313	-0.000159535	0.0795204	0.0475852	0.01834	-0.00335261	4.3359	0.997325	1.66e-05	0.998734	0.000738118
CAMP	2621574	ILMN_1688580	5860075	0.00186681	0.00964628	0.196467	0.0144545	0.0621192	0.00515672	3.16274	2.80304	0.00157218	0.00520177	0.00717877	0.0624085
CAMSAP1	3229529	ILMN_1811957	1340411	0.00269602	0.000206395	0.220917	0.0107001	0.0714916	0.0262392	3.09011	0.40779	0.00201174	0.683552	0.00889922	0.891754
CAMSAP2	2374345	ILMN_1792660	6280209	0.00174256	0.000148011	0.15928	0.00924628	0.0540507	0.0267761	2.94687	0.345318	0.00322481	0.729958	0.0134135	0.910276
CAMTA1	2318455	ILMN_1661940	3930411	0.00043098	0.000145702	0.0691129	0.00908849	0.0448548	0.0265269	1.54081	0.342615	0.123425	0.731991	0.259966	0.910864
CAND1	3420713	ILMN_1744647	240162	4.29e-05	0.00305173	-0.0962601	0.0314353	0.0782204	0.0200146	-1.23063	1.57062	0.21852	0.116722	0.394422	0.418477
CANT1	3772775	ILMN_1664012	5860358	0.00727653	0.0129869	-0.468642	-0.0566564	0.0781803	0.0173862	-5.99437	-3.25871	2.18e-09	0.00117307	3.33e-08	0.0208797
CAP1	2331727	ILMN_1797604	1070754	-0.000179107	0.0114158	-0.00951132	-0.0624579	0.0612989	0.0204616	-0.155163	-3.05244	0.876699	0.00235542	0.93614	0.0349541
CAP2	2896888	ILMN_1691237	3930592	0.000141857	0.00335154	0.0948597	-0.0476035	0.0720377	0.0289164	1.31681	-1.64624	0.187964	0.100161	0.35382	0.388957
CAPN1	3334954	ILMN_1705261	1570672	0.00071154	0.000399052	-0.21722	-0.00833048	0.0876741	0.0146899	-2.47759	-0.567088	0.0132599	0.570835	0.0442976	0.845418
CAPN11	2908371	ILMN_1765274	2810136	-0.00018219	0.000878683	-0.0135791	-0.0254994	0.081886	0.0302941	-0.165829	-0.841727	0.868298	0.400227	0.931866	0.747899
CAPN12	3861503	ILMN_2101034	3710253	-6.87e-05	0.00216171	-0.0610804	-0.0235801	0.116013	0.0178472	-0.526494	-1.32122	0.598568	0.186859	0.759317	0.531427
CAPN13	2546795	ILMN_1677108	450750	0.000574938	0.000453149	0.165287	0.0263139	0.0947254	0.0435427	1.7449	0.604324	0.0810626	0.545823	0.189476	0.830932
CAPN15	3642946	ILMN_1763739	5720382	0.000859218	0.00150555	-0.291877	-0.0202924	0.127909	0.0184109	-2.28191	-1.1022	0.0225362	0.270753	0.0685589	0.637511
CAPN2	2382117	ILMN_1716057	70646	0.0138973	2.14e-07	0.439921	0.000289616	0.0559608	0.0220733	7.86123	0.0131207	4.62e-15	0.989535	1.61e-13	0.996026
CAPN5	3341155	ILMN_1737089	6760661	0.0100494	5.17e-05	0.435373	-0.00442216	0.0662798	0.0216702	6.56871	-0.204066	5.59e-11	0.838361	1.1e-09	0.952315
CAPN7	2612278	ILMN_2117642	430646	-0.000202184	0.000191709	-0.0170606	-0.0121963	0.0896009	0.0310329	-0.190406	-0.393011	0.848998	0.69443	0.921327	0.89554
CAPN9	2385012	ILMN_1731073	2060347	-3.23e-05	0.000180004	-0.0680247	0.0103704	0.0979249	0.0272316	-0.694662	0.380822	0.487299	0.703451	0.666813	0.899848
CAPNS2	3661758	ILMN_1699809	2850241	-0.000135062	0.00156517	-0.0151731	-0.0333767	0.024888	0.0296986	-0.609655	-1.12385	0.542118	0.261461	0.7155	0.627994
CAPS	3818193	ILMN_1757660	6760450	-7.78e-05	0.00094775	-0.0677664	-0.018186	0.0726269	0.0208027	-0.933076	-0.874217	0.350825	0.382299	0.541217	0.73336
CAPS2	3462630	ILMN_1747105	6110114	0.00111967	1.27e-05	-0.137501	-0.00389403	0.0526845	0.0384505	-2.60989	-0.101274	0.00908381	0.919362	0.032232	0.977001
CAPSL	2853275	ILMN_1763843	620162	-0.000107923	0.000695817	0.0264406	-0.0294051	0.0647457	0.0392613	0.408375	-0.748958	0.683015	0.454133	0.820475	0.782976
CAPZA2	3020444	ILMN_1768870	5090403	0.00611166	0.0138134	-0.260267	0.0330908	0.0490308	0.00984135	-5.30824	3.36242	1.15e-07	0.000814475	1.31e-06	0.015678
CAPZA3	3407016	ILMN_2069196	4610324	-0.000161255	0.000255708	0.0294668	0.0128094	0.0299465	0.02822	0.983982	0.453912	0.325172	0.650032	0.512534	0.877532
CARD10	3960133	ILMN_1743714	3840678	-7.5e-06	0.00865633	-0.0989584	0.078842	0.126098	0.0297091	-0.784774	2.6538	0.432623	0.00813901	0.618436	0.0839684
CARD11	3035990	ILMN_1721978	4670279	0.00254446	0.00421216	0.276274	-0.0308105	0.0740535	0.0166863	3.73074	-1.84646	0.000193015	0.0652459	0.00113069	0.310881
CARD16	3389450	ILMN_1724474	5270725	0.000931532	0.00127617	-0.0716318	0.0255332	0.0284897	0.0251649	-2.5143	1.01463	0.0119576	0.31063	0.0407955	0.673731
CARD18	3389473	ILMN_1692349	4280288	0.000602034	0.00217213	0.0952172	0.0516038	0.0360125	0.0389638	2.644	1.3244	0.00821858	0.185799	0.02958	0.529358
CARD6	2807686	ILMN_1779854	450047	0.0026475	0.00543643	0.188733	0.0592744	0.0513311	0.0282369	3.67679	2.09918	0.000238648	0.0361568	0.00136678	0.221162
CARHSP1	3679533	ILMN_1809477	1230348	0.00156095	0.000411016	0.105357	0.00792641	0.0342351	0.0137724	3.07746	0.57553	0.00209896	0.565117	0.00922746	0.842175
CARM1	3820865	ILMN_1680134	460382	0.0263584	0.0260131	0.501785	0.0338853	0.0438267	0.00729134	11.4493	4.64733	5.55e-30	4.02e-06	9.28e-28	0.000237456
CARS	3359529	ILMN_1696066	20010	-0.000120347	3.44e-05	0.0362413	0.00346307	0.0848242	0.0208024	0.427252	0.166475	0.669214	0.867831	0.811707	0.958952
CARS2	3525538	ILMN_1765222	160403	0.00178565	0.000860431	-0.266535	-0.0160963	0.0808683	0.0193249	-3.29591	-0.83293	0.000987823	0.405167	0.00479198	0.751348
CARTPT	2814693	ILMN_1702296	3830598	0.000260018	5.13e-05	-0.101477	-0.00741526	0.0549971	0.0364739	-1.84513	-0.203303	0.0650776	0.838957	0.160169	0.952315
CASC1	3447798	ILMN_1708983	540041	0.000637481	0.000174214	-0.0944468	-0.014018	0.0524758	0.0374166	-1.79982	-0.374646	0.0719493	0.708036	0.173052	0.900283
CASC2	3266583	ILMN_1680927	10577	0.000381289	0.00100803	0.100427	-0.0289453	0.0708542	0.0321036	1.41737	-0.90162	0.156436	0.367567	0.310706	0.723226
CASC3	3720739	ILMN_1665004	2970463	0.00227847	0.00010831	0.274873	0.00422096	0.0807051	0.0142894	3.40589	0.295391	0.000664633	0.767783	0.00340656	0.925972
CASC4	3591838	ILMN_1686948	60241	0.000663328	0.000183765	0.152334	0.0132924	0.0654953	0.0345455	2.32588	0.384781	0.0200643	0.700516	0.0622971	0.898106
CASC5	3590014	ILMN_1715437	4260050	0.000236685	0.00013198	-0.0603681	0.0123455	0.0435876	0.0378604	-1.38498	0.326079	0.166119	0.744461	0.324693	0.916048
CASD1	3013178	ILMN_2139035	6020520	0.0013146	0.000849608	-0.155998	-0.0235115	0.0585708	0.0284069	-2.66341	-0.82767	0.0077599	0.408138	0.0282583	0.753185
CASK	4005859	ILMN_1654773	1660424	0.000850497	6.32e-05	0.130683	0.00603449	0.0678923	0.0267512	1.92486	0.225578	0.0543031	0.821595	0.138781	0.946713
CASKIN1	3676557	ILMN_1679039	6860528	0.00130554	0.000734656	-0.387211	-0.0240505	0.139916	0.0312509	-2.76745	-0.769594	0.00567033	0.441799	0.0215205	0.774354
CASP10	2522693	ILMN_2321720	7100301	0.00885021	6.28e-05	0.370073	-0.00579692	0.0578056	0.0257635	6.40203	-0.225005	1.67e-10	0.82204	3.07e-09	0.946906
CASP12	3389257	ILMN_2132119	2640634	-0.000127062	7.36e-05	0.051319	-0.00716113	0.0609089	0.0294065	0.842553	-0.243522	0.399518	0.807672	0.588965	0.94097
CASP14	3822976	ILMN_1739513	5670300	0.000551942	1.25e-05	-0.0966021	-0.00302761	0.0585999	0.0301491	-1.6485	-0.100421	0.0993118	0.920038	0.220266	0.977072
CASP2	3029030	ILMN_2296057	1440019	0.00523362	1.35e-07	0.424528	0.000273608	0.0842167	0.0262114	5.0409	0.0104385	4.8e-07	0.991674	4.86e-06	0.996808
CASP3	2796484	ILMN_2388155	2260215	0.0083675	0.00423217	-0.308661	0.0217968	0.0483032	0.0117766	-6.39008	1.85086	1.81e-10	0.064609	3.28e-09	0.308455
CASP5	3389330	ILMN_1722158	3390121	0.00127435	0.0018045	0.0525029	0.0213215	0.0239473	0.0176666	2.19243	1.20688	0.0283938	0.227883	0.0824844	0.585726
CASP6	2781693	ILMN_1694877	5550709	0.00797388	0.00151063	0.254076	0.0219452	0.0408151	0.0198768	6.22505	1.10406	5.2e-10	0.269946	8.83e-09	0.636914
CASP7	3264948	ILMN_2373763	5290465	0.00192372	0.000152053	0.166391	0.00873724	0.0557871	0.0249634	2.98261	0.350002	0.00287172	0.726442	0.0120994	0.908522
CASP8AP2	2916952	ILMN_1747129	1050524	0.00259898	0.000582101	-0.235862	-0.0286112	0.0580679	0.0417692	-4.06184	-0.684984	4.94e-05	0.49358	0.000330332	0.804933
CASQ1	2362991	ILMN_1813949	7150053	0.000578623	0.000325953	0.149744	0.0141239	0.0637838	0.0275588	2.34767	0.512501	0.0189295	0.608461	0.0593392	0.861379
CASQ2	2429556	ILMN_1722329	6620035	-0.00021996	0.00209499	-0.0157605	0.0377225	0.0746233	0.0290035	-0.211201	1.30062	0.832739	0.193816	0.913141	0.539362
CASR	2638824	ILMN_1767711	2940594	3.53e-05	0.000775589	-0.0726752	0.0305549	0.0797947	0.0386399	-0.910777	0.790761	0.362457	0.42935	0.553211	0.766129
CAT	3326400	ILMN_1651705	4040364	0.00544504	0.000972243	0.227074	-0.00794813	0.0434406	0.00897634	5.22723	-0.885454	1.79e-07	0.376215	1.96e-06	0.730354
CATSPER1	3378043	ILMN_1789394	6590544	0.00394356	0.0065053	-0.437777	-0.0492899	0.100064	0.0214518	-4.37496	-2.29771	1.24e-05	0.0218712	9.42e-05	0.161389
CATSPER2P1	3621594	ILMN_1794157	3390142	0.000107265	0.00136115	-0.0591921	-0.0260492	0.0473143	0.024858	-1.25104	-1.04792	0.210977	0.295036	0.385252	0.659344
CATSPER3	2829624	ILMN_1693961	6400279	0.000818807	0.0011124	0.140229	-0.0359852	0.0503723	0.037991	2.78385	-0.947203	0.00539173	0.343861	0.0206517	0.703962
CATSPERB	3576633	ILMN_1762091	7040603	-0.000195369	5.62e-05	-0.024231	-0.0086211	0.0792836	0.0405131	-0.305624	-0.212798	0.759904	0.831546	0.869018	0.950869
CATSPERD	3818091	ILMN_1702739	7650546	-0.000103588	1.1e-05	-0.0824198	-0.00270615	0.108917	0.0287484	-0.756724	-0.0941321	0.44925	0.925031	0.633673	0.977662
CATSPERG	3832308	ILMN_1800031	6110440	-1.24e-05	0.00212515	-0.0987183	-0.0402469	0.114176	0.0307236	-0.864613	-1.30997	0.387292	0.190634	0.577433	0.535714
CAV1	3020302	ILMN_2149226	1070215	-3.99e-05	0.00188955	-0.0764566	-0.0300139	0.0518228	0.0243017	-1.47535	-1.23505	0.140182	0.217223	0.286353	0.571602
CAV3	2609462	ILMN_1804980	3130020	-0.000208551	0.00397437	0.00758548	0.0685815	0.0542928	0.0382424	0.139714	1.79334	0.888891	0.0733487	0.942863	0.331776
CBFB	3665116	ILMN_1766408	2600537	-0.000192885	6.48e-08	0.00297222	0.000131751	0.0763309	0.0182385	0.0389386	0.00722378	0.968941	0.994238	0.986039	0.99755
CBL	3352070	ILMN_1716080	4120037	0.00256156	0.0069095	0.253372	-0.0432203	0.0730331	0.0182475	3.46927	-2.36857	0.000526243	0.0181266	0.0027774	0.142711
CBLB	2687255	ILMN_1685580	5270132	0.00399882	0.00387306	0.247887	-0.0284726	0.057556	0.0160841	4.30689	-1.77023	1.69e-05	0.0771224	0.000123431	0.341538
CBLC	3835751	ILMN_1811729	3870471	-0.000202717	0.00306661	0.0130812	0.0518193	0.0901206	0.0329125	0.145152	1.57446	0.884597	0.115832	0.940483	0.417631
CBLL1	3018652	ILMN_1705433	3290019	0.000157008	0.00132477	0.080722	-0.0235393	0.0629253	0.0227697	1.28282	-1.0338	0.199613	0.301586	0.370368	0.664622
CBLN1	3690747	ILMN_1712461	2140113	-9.75e-05	4.04e-05	0.0251595	0.00468365	0.0521849	0.025951	0.482123	0.18048	0.62974	0.856828	0.782547	0.955657
CBLN2	3812864	ILMN_1796069	670019	-0.000199685	0.00117483	0.00305195	0.0280433	0.0883741	0.028808	0.0345345	0.973457	0.972452	0.330661	0.987668	0.691988
CBLN3	3558270	ILMN_2053829	6620291	0.00115204	0.000915054	0.156517	0.0195788	0.0644876	0.0227929	2.42708	0.858989	0.0152556	0.390639	0.0496971	0.740592
CBLN4	3910724	ILMN_1699768	4640315	1.76e-05	0.000916035	0.0760547	-0.0354802	0.0740953	0.0412825	1.02645	-0.85945	0.304731	0.390385	0.491563	0.740343
CBR1	3919785	ILMN_1809003	3060162	0.000578573	0.00108505	0.0652113	0.0233285	0.03809	0.0249376	1.71203	0.935472	0.0869522	0.349866	0.199576	0.709861
CBR3	3919834	ILMN_1652237	5560543	0.000337564	0.00256608	0.0418606	-0.0361156	0.0276136	0.0250833	1.51594	-1.43983	0.129597	0.150361	0.269482	0.478187
CBR4	2793054	ILMN_1813400	5810750	0.00369475	0.000559539	-0.205626	-0.0120839	0.0496432	0.0179936	-4.14208	-0.671569	3.5e-05	0.502078	0.000240719	0.80775
CBS	3933923	ILMN_1804735	1230047	0.000265527	0.00147319	-0.166482	-0.0129457	0.0968351	0.0118738	-1.71924	-1.09027	0.0856329	0.275969	0.197413	0.642098
CBX1	3761127	ILMN_1770244	1070386	0.00203973	0.00587903	-0.161621	-0.0346346	0.0522308	0.0158618	-3.09435	-2.18352	0.00198323	0.0293275	0.00878923	0.195833
CBX2	3736985	ILMN_1709645	3180537	-0.00011626	5.2e-06	0.0290298	0.00179858	0.0584219	0.0277871	0.4969	0.0647274	0.619281	0.948409	0.773263	0.984373
CBX3	2993639	ILMN_1790625	1400017	0.00364607	0.00769682	-0.250745	0.0456552	0.056645	0.0182547	-4.4266	2.50101	9.78e-06	0.0126103	7.59e-05	0.11323
CBX4	3773174	ILMN_1724145	3830170	0.00388049	0.0103058	-0.412211	-0.0547391	0.102075	0.0188861	-4.03833	-2.89839	5.46e-05	0.00386768	0.000362315	0.0501011
CBX5	3456630	ILMN_1813028	7150685	-0.000202108	5.95e-06	-0.00291914	0.00134546	0.0439843	0.0194398	-0.0663679	0.0692116	0.947088	0.944841	0.976609	0.983274
CBX6	3960930	ILMN_1691930	3370288	0.00187488	0.00343806	-0.221333	-0.0245397	0.0647976	0.014717	-3.41575	-1.66744	0.000641075	0.0958722	0.00329703	0.380825
CBX7	3961023	ILMN_1657361	1500747	0.00680443	0.0123167	-0.299958	-0.058594	0.0559635	0.0184707	-5.35989	-3.17227	8.7e-08	0.00157835	1e-06	0.0260893
CBX8	3773149	ILMN_1775183	1410475	0.00463699	0.00144158	-0.356506	-0.0316541	0.0777742	0.0293504	-4.58386	-1.07849	4.67e-06	0.281186	3.87e-05	0.646497
CBY1	3945349	ILMN_2399571	4280039	9.76e-05	0.000139487	0.0605691	0.0115277	0.0507592	0.0343878	1.19326	0.335227	0.232822	0.737554	0.410763	0.913268
CC2D1A	3822444	ILMN_1701127	7650746	-5.23e-05	0.00180719	-0.158626	-0.0310248	0.131368	0.0256874	-1.20749	-1.20778	0.227299	0.227537	0.404274	0.585063
CC2D1B	2412740	ILMN_2149935	730497	0.0015485	0.000548161	0.228018	-0.0146319	0.0875406	0.0220127	2.60471	-0.664702	0.00922208	0.506459	0.0326457	0.809856
CC2D2B	3259367	ILMN_1809342	7550239	-0.000190048	0.00032507	-0.011593	0.0206118	0.0569224	0.0402726	-0.203663	0.511807	0.838625	0.608947	0.916011	0.861379
CCAR1	3249788	ILMN_1679127	270291	-0.000134185	0.000453843	0.0531253	0.0163545	0.0801635	0.0270417	0.662713	0.604787	0.507545	0.545516	0.686419	0.830932
CCBE1	3810542	ILMN_1813528	6560465	-3.5e-05	0.00118672	-0.0565364	0.0284107	0.0715937	0.0290386	-0.789684	0.978376	0.42975	0.328225	0.615826	0.689764
CCDC101	3686587	ILMN_1701477	1240113	0.000305132	0.00574533	0.0714328	-0.0501063	0.0612456	0.0232148	1.16633	-2.15838	0.243535	0.031236	0.424134	0.202908
CCDC102A	3693240	ILMN_1796762	1660681	-9.94e-05	0.0048485	0.0673924	-0.0363549	0.0895524	0.0183448	0.752547	-1.98175	0.451757	0.0478958	0.635869	0.261183
CCDC104	2483016	ILMN_2103014	4390072	0.00230481	0.0015856	0.174173	0.0367346	0.0513202	0.0324748	3.39386	1.13117	0.000694466	0.258368	0.0035414	0.624642
CCDC105	3822961	ILMN_1677859	5870414	-0.000201477	0.00120436	0.00356739	0.0384698	0.0818869	0.0390307	0.0435648	0.985631	0.965253	0.324653	0.984704	0.687201
CCDC106	3842327	ILMN_1682567	3940471	0.00140801	0.00312191	-0.267441	-0.0276616	0.0932374	0.0174121	-2.86838	-1.58864	0.00414286	0.112592	0.0165687	0.411879
CCDC107	3168032	ILMN_1709630	4760398	0.000630855	8.88e-05	0.175246	0.00577284	0.0884991	0.0215894	1.98021	0.267392	0.0477347	0.789246	0.125208	0.9334
CCDC108	2599704	ILMN_2306935	6420332	0.000512071	0.000495864	-0.083908	0.0182436	0.0463882	0.0288582	-1.80882	0.632181	0.0705385	0.527474	0.170407	0.820963
CCDC109B	2739160	ILMN_1801766	1780259	0.0025333	0.013022	0.169257	0.0526739	0.0492482	0.016142	3.43681	3.26317	0.000593361	0.00115503	0.00308858	0.0206195
CCDC11	3807732	ILMN_1746949	130079	0.00104463	0.000293518	0.11967	-0.0194315	0.0487384	0.0399558	2.45534	-0.486325	0.0141085	0.626888	0.0466541	0.869958
CCDC110	2796911	ILMN_2163206	4560433	-0.000136827	3.58e-05	0.0246048	0.006486	0.0671271	0.0382074	0.366541	0.169757	0.713977	0.86525	0.840671	0.958176
CCDC111	2754371	ILMN_1716368	770768	0.000621208	0.000872353	-0.107797	-0.0246789	0.0544153	0.0294256	-1.98101	-0.838686	0.0476446	0.40193	0.125026	0.749192
CCDC112	2871717	ILMN_1761101	1710026	0.00221271	0.00114541	-0.129618	0.0252953	0.0493906	0.026317	-2.62434	0.961176	0.00870791	0.336794	0.031072	0.698034
CCDC113	3663181	ILMN_1775520	4590100	-8.88e-06	0.000599379	-0.0928476	0.0196725	0.0736959	0.0283024	-1.25988	0.695082	0.207773	0.487233	0.380843	0.800538
CCDC114	3867032	ILMN_1658376	7210482	-0.000166803	0.000175989	-0.0241706	0.0146275	0.0722241	0.0388461	-0.334661	0.37655	0.737895	0.706622	0.855129	0.900283
CCDC115	2575980	ILMN_1730347	5910095	0.00123914	0.00129613	-0.204312	-0.0219655	0.0687912	0.0214812	-2.97003	-1.02255	0.00299176	0.306874	0.0125002	0.66917
CCDC116	3938215	ILMN_1795085	1430576	9.92e-05	0.000436756	0.129013	-0.0143269	0.0840714	0.0241484	1.53456	-0.593286	0.124954	0.55318	0.262226	0.835421
CCDC117	3941643	ILMN_1809889	6940541	0.00756624	0.00107304	0.367618	0.0184517	0.0632539	0.0198346	5.81178	0.930276	6.56e-09	0.352548	9.26e-08	0.712307
CCDC121	2545999	ILMN_1791424	830605	9.17e-06	0.000339291	-0.0382648	-0.0147401	0.036066	0.02819	-1.06096	-0.522886	0.288757	0.601218	0.475149	0.85807
CCDC124	3824648	ILMN_1811775	2070537	0.00296233	0.00222829	0.282926	0.0346674	0.0639388	0.0258431	4.42496	1.34146	9.85e-06	0.180205	7.65e-05	0.522239
CCDC126	2992963	ILMN_1751264	7000332	0.0148811	0.000749329	-0.335289	0.0168309	0.0402636	0.0216546	-8.32735	0.777247	1.05e-16	0.437274	4.31e-15	0.772924
CCDC127	2845274	ILMN_2214955	2070164	-0.000131514	0.00183162	0.0139608	-0.0302393	0.0321456	0.0248691	0.4343	-1.21594	0.66409	0.224417	0.808556	0.581179
CCDC13	2670903	ILMN_1669621	5220301	-0.000156613	0.00163702	0.0645662	-0.0329406	0.0984634	0.0286589	0.655739	-1.1494	0.512022	0.250781	0.69034	0.61665
CCDC130	3822287	ILMN_1758633	3830538	-0.00020091	0.00956666	-0.00244493	-0.0516631	0.0827313	0.0185085	-0.0295526	-2.79132	0.976425	0.00539177	0.989315	0.0636345
CCDC132	3012819	ILMN_1716342	460682	0.00709369	0.00382245	-0.284042	0.0368718	0.0505961	0.0209669	-5.6139	1.75857	2.08e-08	0.079085	2.69e-07	0.346158
CCDC134	3947096	ILMN_1809883	2640132	0.00158198	0.00236371	-0.157407	-0.0532519	0.0563881	0.03854	-2.79149	-1.38173	0.00526633	0.167494	0.0202357	0.503608
CCDC135	3662876	ILMN_1792152	1340471	-0.000195081	0.00575324	-0.0142302	0.0678656	0.086459	0.031421	-0.164589	2.15988	0.869274	0.0311196	0.932581	0.202906
CCDC136	3023103	ILMN_1706935	7100364	0.000563075	0.00151036	0.152274	-0.0242666	0.087582	0.0219814	1.73864	-1.10396	0.082159	0.269988	0.191523	0.636914
CCDC137	3738110	ILMN_1743506	7100681	-2.17e-05	0.00812717	-0.0383188	-0.0698767	0.0691198	0.0271828	-0.554382	-2.57062	0.579342	0.0103563	0.745682	0.0987294
CCDC138	2499234	ILMN_1767260	6960189	0.0016878	0.00271824	-0.161493	0.0467652	0.0550534	0.0315548	-2.93338	1.48203	0.00336798	0.138779	0.0138939	0.460838
CCDC14	2692573	ILMN_1677239	4390612	8.98e-05	0.00705576	-0.0769275	0.042641	0.0689815	0.0178138	-1.11519	2.39371	0.264822	0.0169403	0.447686	0.136998
CCDC141	2589868	ILMN_1693711	3360082	-7.68e-05	1.03e-05	0.0394905	0.00356785	0.0473443	0.0391846	0.834113	0.0910524	0.404257	0.927477	0.593192	0.978747
CCDC142	2560149	ILMN_1714936	3930538	0.00220048	0.000476603	-0.236378	0.0175641	0.0707033	0.0283395	-3.34324	0.619774	0.000834088	0.535607	0.00414636	0.825336
CCDC144NL	3749451	ILMN_1809491	270070	-0.000216836	0.0043671	0.0216314	-0.0577308	0.0247186	0.0307033	0.875107	-1.88028	0.381558	0.0604833	0.572406	0.297236
CCDC146	3009838	ILMN_1790555	4860133	0.00139664	1.49e-05	-0.0914023	-0.00240434	0.0348021	0.0219459	-2.62635	-0.109558	0.00865675	0.912791	0.0309353	0.97372
CCDC148	2582701	ILMN_1663816	1300164	0.00186476	0.00301524	-0.271876	-0.0575021	0.0834464	0.0368328	-3.25809	-1.56116	0.00112909	0.118935	0.00539687	0.423763
CCDC15	3354389	ILMN_1825660	6200593	0.000113291	0.00777558	-0.0466211	0.0633892	0.0457991	0.0252156	-1.01795	2.51389	0.308752	0.0121631	0.495203	0.110282
CCDC150	2521278	ILMN_2235602	160528	-0.000123642	0.00658414	0.0503536	0.0710047	0.074278	0.0307154	0.677907	2.31169	0.497861	0.0210828	0.676503	0.158109
CCDC151	3850929	ILMN_1743095	4260615	0.00106017	0.000358851	-0.186954	-0.0208733	0.0822643	0.0388158	-2.2726	-0.537753	0.0230922	0.590918	0.0698621	0.853908
CCDC155	3838444	ILMN_1660007	4010601	-0.000206683	0.00189475	-0.0277491	-0.0327645	0.0974082	0.0264923	-0.284874	-1.23676	0.775752	0.216591	0.879132	0.571576
CCDC158	2774123	ILMN_1727511	6900747	-0.000214	0.000151846	0.0183215	0.0142927	0.0752674	0.0408639	0.243419	0.349765	0.807691	0.72662	0.899591	0.908522
CCDC17	2410283	ILMN_1787441	4830494	1.31e-05	0.00104566	0.0591856	-0.0331521	0.095459	0.036101	0.620011	-0.918316	0.535279	0.358768	0.710286	0.717775
CCDC170	2931700	ILMN_1772588	4640398	0.000988273	8.67e-05	-0.129641	0.0078405	0.0554606	0.0296608	-2.33753	0.264339	0.0194504	0.791596	0.0606724	0.933874
CCDC171	3163200	ILMN_1764188	3610040	0.000291973	0.000569648	-0.112335	0.0199603	0.0768906	0.0294568	-1.46097	0.677613	0.144085	0.49824	0.292491	0.805554
CCDC174	2611981	ILMN_1750144	6960170	6.67e-05	0.00270413	0.0365911	-0.0404409	0.0299252	0.0273587	1.22275	-1.47817	0.22148	0.13981	0.397897	0.462579
CCDC176	3543979	ILMN_2147345	830681	0.0227707	0.0527046	0.223389	0.145495	0.020266	0.0216452	11.0228	6.72182	6.16e-28	3.71e-11	8.95e-26	2.03e-08
CCDC177	3570218	ILMN_1775121	3940360	-0.000216495	0.00486511	0.00669874	0.0512275	0.0382206	0.0258052	0.175265	1.98516	0.860878	0.0475144	0.926519	0.260131
CCDC18	2347023	ILMN_2077406	2230687	0.000398612	0.000368401	-0.0437285	-0.019471	0.031475	0.0357354	-1.38931	-0.544864	0.1648	0.58602	0.322953	0.851733
CCDC181	2443305	ILMN_1777963	6550240	-0.000115865	2.77e-05	-0.0794973	0.00412917	0.0681218	0.0276385	-1.16699	0.149399	0.243271	0.881282	0.423921	0.964053
CCDC22	3977083	ILMN_1781234	5490411	0.0014613	0.000675893	-0.390916	-0.016457	0.122522	0.022295	-3.19058	-0.738149	0.00142857	0.460671	0.00662853	0.786695
CCDC23	2409069	ILMN_2050023	630086	0.00213121	0.0182701	0.0585773	0.0334473	0.0160998	0.00862699	3.63839	3.87705	0.000277094	0.000115638	0.00156246	0.00351878
CCDC24	2333707	ILMN_1718771	2320402	5.77e-05	0.000132394	0.0930687	0.00815793	0.0953854	0.0249791	0.975713	0.32659	0.329254	0.744075	0.517248	0.915911
CCDC25	3129121	ILMN_1793146	2000288	-0.000198015	0.00245473	-0.00420641	0.0355261	0.0431692	0.0252289	-0.0974399	1.40815	0.922381	0.159528	0.962978	0.490385
CCDC27	2317472	ILMN_1811167	1240682	0.00045961	0.00352623	-0.162996	0.0466817	0.109702	0.0276424	-1.48581	1.68877	0.137392	0.0917068	0.282233	0.373144
CCDC28A	2927873	ILMN_1798659	2000504	0.00441041	0.00973074	-0.250368	-0.0609849	0.0529135	0.021661	-4.73165	-2.81543	2.29e-06	0.00500765	2.02e-05	0.0606454
CCDC28B	2328750	ILMN_2099586	6200561	0.00146245	0.000202804	-0.191416	-0.00896687	0.0671935	0.0221828	-2.84873	-0.404227	0.00440724	0.686169	0.0174695	0.892397
CCDC33	3601538	ILMN_1681136	830465	0.000235052	0.00812444	0.139373	0.0686858	0.0839244	0.0267241	1.6607	2.57018	0.0968362	0.0103693	0.216369	0.0987746
CCDC34	3367036	ILMN_1803490	2470025	0.00169087	0.000795158	0.171689	0.0235735	0.0577859	0.0294417	2.97112	0.800684	0.00298112	0.423585	0.0124818	0.76296
CCDC37	2640379	ILMN_1770493	7570682	-1.91e-05	2.99e-05	-0.0487053	-0.00605694	0.0785973	0.0389978	-0.619682	-0.155315	0.535495	0.876618	0.710495	0.962745
CCDC38	3466634	ILMN_1687813	2760021	0.00040661	0.000882622	-0.128454	0.0248304	0.0738972	0.0294334	-1.73827	0.843613	0.0822235	0.399172	0.191606	0.747406
CCDC41	3466110	ILMN_1799113	7050471	0.00386901	2.45e-06	-0.237846	-0.00115982	0.0544744	0.0260939	-4.3662	-0.0444481	1.29e-05	0.96456	9.73e-05	0.989692
CCDC42	3744589	ILMN_2214562	2850746	0.000530858	0.00109736	-0.138914	-0.0252615	0.0660794	0.0268519	-2.10223	-0.940772	0.0355829	0.347145	0.0990698	0.706807
CCDC43	3759305	ILMN_1743783	5550187	0.00163873	0.00355235	0.114954	0.0403295	0.0398673	0.0237927	2.88342	1.69504	0.00395046	0.0905105	0.0159154	0.370372
CCDC47	3766334	ILMN_1804522	1850367	0.00186851	0.000284231	-0.234028	-0.0105093	0.0702821	0.02196	-3.32983	-0.478567	0.000875213	0.632395	0.00432226	0.872147
CCDC50	2657981	ILMN_2302118	70603	0.00604646	0.0127311	-0.245372	-0.0533874	0.0479027	0.0165493	-5.1223	-3.22597	3.13e-07	0.00131365	3.29e-06	0.0226459
CCDC51	2673257	ILMN_1799579	4290259	0.00104997	0.000204595	0.123519	0.00845708	0.04604	0.0208298	2.68287	0.406009	0.00732304	0.68486	0.0268541	0.892362
CCDC53	3468225	ILMN_1715569	7040544	0.000605987	0.0205535	-0.0826791	0.0702191	0.0405915	0.017053	-2.03686	4.1177	0.0417163	4.28e-05	0.112854	0.00161169
CCDC54	2634919	ILMN_1707311	6900767	0.000386046	0.00117037	-0.0715793	-0.0264237	0.0421794	0.0271959	-1.69702	-0.971606	0.0897542	0.331581	0.204295	0.692943
CCDC57	3774701	ILMN_1687437	3420768	0.000116151	1.98e-05	0.0669751	0.0038245	0.0645932	0.0303205	1.03688	0.126136	0.299844	0.89966	0.486222	0.968298
CCDC59	3464000	ILMN_1662318	1780730	0.00769976	0.000393985	-0.190897	0.00946415	0.0299121	0.016796	-6.38194	0.563475	1.91e-10	0.573291	3.45e-09	0.846818
CCDC6	3290785	ILMN_1745904	7330435	0.00549878	0.00050798	0.303091	0.0154138	0.0611272	0.0240893	4.95836	0.639862	7.34e-07	0.522471	7.17e-06	0.818164
CCDC60	3434048	ILMN_1722446	2140544	0.000365546	0.0012445	-0.17442	0.0246788	0.0814591	0.0246309	-2.1412	1.00195	0.0323059	0.316714	0.0915967	0.680165
CCDC62	3435515	ILMN_1701905	5490463	0.000259207	0.00650891	0.116049	-0.0762868	0.0702869	0.033192	1.65108	-2.29835	0.0987839	0.0218344	0.219459	0.161307
CCDC63	3431701	ILMN_1773060	7050128	-9.15e-05	0.000137499	0.0412267	-0.0131326	0.0684914	0.0394576	0.601925	-0.332828	0.547251	0.739363	0.720225	0.914246
CCDC64	3434193	ILMN_1653102	5310753	0.00032236	0.000235441	0.0739494	0.0142107	0.0581136	0.0326272	1.2725	0.435548	0.203255	0.663299	0.374958	0.883641
CCDC65	3413643	ILMN_2227195	2370228	-0.000198444	0.000763438	-0.000755435	-0.0187013	0.0591656	0.0238373	-0.0127681	-0.784537	0.989813	0.432989	0.995603	0.769206
CCDC67	3344685	ILMN_1663062	5700379	-0.000166185	0.00025706	0.0471104	0.0196329	0.0776168	0.0431387	0.606961	0.455112	0.543904	0.649169	0.71723	0.877348
CCDC68	3808745	ILMN_2203876	150471	0.000304073	5.76e-05	0.0937009	-0.00658271	0.0518503	0.0305486	1.80714	-0.215484	0.0707997	0.829453	0.170935	0.950177
CCDC69	2881860	ILMN_1657680	160068	0.000198856	0.0128205	0.085389	-0.0545588	0.0642916	0.0168524	1.32815	-3.23745	0.184188	0.00126267	0.348863	0.022083
CCDC71L	3066956	ILMN_1696029	6980128	0.00228722	1.96e-06	-0.250607	0.00120222	0.0700085	0.0302436	-3.57967	0.0397514	0.000347267	0.968303	0.00191164	0.989866
CCDC73	3368398	ILMN_1730745	5810280	-0.000128229	0.00233311	-0.0271794	-0.0363541	0.0463485	0.0264831	-0.586413	-1.37273	0.557624	0.170274	0.727837	0.50742
CCDC77	3400190	ILMN_2101375	3850291	0.000171423	9.23e-05	0.050604	-0.00629825	0.0480169	0.0231018	1.05388	-0.27263	0.291988	0.785217	0.478507	0.931072
CCDC78	3675333	ILMN_1811397	6450487	-0.000205174	1.19e-06	-0.0126276	-0.00118175	0.118627	0.0382301	-0.106447	-0.0309116	0.915232	0.975349	0.958503	0.992285
CCDC79	3695235	ILMN_1697634	6560703	0.000605148	0.00341015	-0.160925	0.059915	0.0776995	0.0360797	-2.07113	1.66063	0.0383978	0.0972334	0.105397	0.383365
CCDC8	3865973	ILMN_1760314	2940538	3.63e-05	2.29e-05	0.0733675	-0.00534215	0.070983	0.0392984	1.03359	-0.135938	0.301376	0.891909	0.488247	0.966239
CCDC81	3343293	ILMN_1794534	1470148	-8.36e-05	3.58e-05	0.071809	0.00610202	0.0774489	0.0359504	0.92718	0.169735	0.353878	0.865268	0.544671	0.958176
CCDC83	3343059	ILMN_1792296	6620377	-0.000198915	0.00558102	0.0408705	0.0836728	0.0681581	0.0393367	0.599642	2.12709	0.548771	0.03376	0.72124	0.212877
CCDC84	3351733	ILMN_1709227	6760762	7.85e-06	0.0204913	0.0760019	-0.0747142	0.072069	0.0181728	1.05457	-4.11131	0.291672	4.4e-05	0.478299	0.00164149
CCDC85B	3335719	ILMN_1657332	6400646	0.000743386	0.00281545	-0.146838	0.0305686	0.0727881	0.0202658	-2.01734	1.50839	0.0437128	0.131905	0.116897	0.448493
CCDC85C	3579269	ILMN_1838863	50543	-6.96e-05	9.66e-05	-0.0766481	-0.00668132	0.0925867	0.0239527	-0.827852	-0.278938	0.407793	0.780374	0.596668	0.930028
CCDC86	3332548	ILMN_1792681	650300	0.000650884	0.00921154	-0.159175	-0.0554068	0.0668669	0.0202328	-2.38048	-2.73846	0.017327	0.00632901	0.0551625	0.0705808
CCDC87	3378368	ILMN_1706691	6940187	0.000124086	0.000243779	-0.0952039	-0.0111804	0.0699029	0.0252267	-1.36194	-0.443196	0.173276	0.657761	0.334467	0.881452
CCDC88B	3334518	ILMN_1772208	4860711	0.00394291	0.000288841	-0.571442	-0.00754828	0.133845	0.0156463	-4.26943	-0.482433	2e-05	0.629648	0.000143828	0.870807
CCDC89	3385027	ILMN_1695972	3990564	0.000530828	0.00112313	-0.0621833	-0.0251662	0.0327113	0.0264414	-1.90097	-0.951769	0.0573627	0.341541	0.144849	0.702548
CCDC9	3837193	ILMN_1719190	4390255	0.00939654	0.000372142	-0.651398	0.0164693	0.0971362	0.0300741	-6.70603	0.547625	2.22e-11	0.584123	4.66e-10	0.851127
CCDC90B	3384471	ILMN_1692948	2750192	3.01e-05	0.000526783	0.048996	0.0159496	0.053639	0.0244775	0.91344	0.651604	0.361055	0.51487	0.551771	0.813892
CCDC91	3409432	ILMN_1676523	2340594	1.82e-05	0.00210139	0.0525967	0.0268046	0.048502	0.0205777	1.08442	1.30261	0.278229	0.193136	0.463481	0.53835
CCDC92	3476330	ILMN_1731107	4830682	0.00100059	0.00442495	0.0822287	-0.0332172	0.04001	0.0175497	2.0552	-1.89275	0.0399107	0.0588011	0.10888	0.292938
CCDC93	2572601	ILMN_1694269	2850392	0.00710466	4.59e-05	0.335132	-0.00442344	0.0590853	0.0229919	5.67201	-0.192391	1.49e-08	0.847491	1.97e-07	0.953841
CCDC94	3817400	ILMN_1703430	2370601	6.18e-05	0.00408172	0.10333	-0.0337484	0.0711803	0.0185685	1.45167	-1.81751	0.146657	0.069565	0.29617	0.323277
CCDC96	2759393	ILMN_1799710	4670463	0.000686878	0.0014094	-0.0995494	-0.0289628	0.044968	0.0271604	-2.21378	-1.06636	0.0268882	0.286626	0.0791796	0.650793
CCDC97	3834149	ILMN_1801600	6650201	0.00197167	0.0132706	-0.219128	-0.0715824	0.0612858	0.0217269	-3.57552	-3.29465	0.00035281	0.00103488	0.00193772	0.0190969
CCER1	3465188	ILMN_1758537	4050274	0.00068703	0.000828875	-0.140049	-0.0255354	0.0736825	0.0312359	-1.90071	-0.817499	0.0573971	0.41392	0.144875	0.756635
CCIN	3168409	ILMN_1660963	2480167	0.000265673	0.000105736	-0.0414259	-0.00899918	0.0316965	0.0308339	-1.30696	-0.29186	0.191288	0.77048	0.358333	0.926386
CCKAR	2764478	ILMN_1656330	6960040	-4.99e-05	0.000761907	0.0444435	-0.0237759	0.0607861	0.0303361	0.731147	-0.783749	0.464724	0.433451	0.646791	0.769497
CCKBR	3318639	ILMN_1760088	2070201	0.000295264	0.000575649	-0.121559	0.0223952	0.0755221	0.0328774	-1.60958	0.681175	0.107553	0.495985	0.234488	0.805244
CCL1	3753220	ILMN_2086965	1030204	-0.000185169	6.18e-05	0.00577552	0.00642206	0.0566899	0.0287747	0.101879	0.223184	0.918857	0.823457	0.96051	0.94751
CCL11	3718185	ILMN_1725519	870603	0.000831893	0.00120048	-0.1224	0.0268565	0.0556026	0.0272921	-2.20134	0.98404	0.0277573	0.325434	0.0810972	0.687938
CCL13	3718204	ILMN_1783593	1230605	6.93e-06	6.74e-05	0.0479173	0.00871616	0.0413453	0.0374112	1.15895	0.232982	0.24653	0.815843	0.427191	0.944553
CCL16	3753956	ILMN_2045324	2680600	-6.49e-05	7.54e-05	-0.026509	0.00846422	0.0548581	0.0343489	-0.483229	0.246419	0.628954	0.80543	0.782052	0.940516
CCL17	3662710	ILMN_1710186	6290088	-0.000131837	0.00693644	0.0240424	-0.0943885	0.0585419	0.0397724	0.410687	-2.37322	0.681319	0.0179018	0.820088	0.141919
CCL18	3718902	ILMN_1654411	5340348	-0.000169158	3.19e-07	0.0217574	0.00049816	0.0402508	0.031094	0.540544	0.0160211	0.588846	0.987222	0.752928	0.995317
CCL19	3204285	ILMN_1769129	7100646	-0.00017975	0.00211514	-0.0173563	0.0446842	0.0453984	0.0341918	-0.38231	1.30687	0.702247	0.191684	0.832465	0.537108
CCL2	7385547	ILMN_1720048	1030333	0.000106319	0.00480718	-0.0631762	-0.0577663	0.0480279	0.0292748	-1.31541	-1.97325	0.188433	0.0488588	0.354397	0.262717
CCL20	2530713	ILMN_1657234	4220246	-0.000119188	0.00200675	0.016802	0.0474543	0.0375758	0.0372814	0.44715	1.27287	0.654786	0.203486	0.802009	0.552129
CCL21	3204301	ILMN_1677505	1340626	0.000522408	0.00131882	-0.127606	0.0341397	0.0601305	0.033098	-2.12216	1.03147	0.0338731	0.302675	0.0951004	0.665554
CCL22	3662687	ILMN_2160476	2480092	-0.000140357	0.00320568	0.0330538	-0.0700236	0.0779445	0.0434959	0.424068	-1.60989	0.671534	0.107871	0.813101	0.404524
CCL23	3753985	ILMN_1686109	6110343	0.00027463	0.00252813	-0.05639	-0.0188559	0.0434139	0.0131941	-1.29889	-1.42911	0.19404	0.153416	0.362396	0.482303
CCL24	3057514	ILMN_1653766	780356	-1.63e-05	0.000322822	-0.0375464	-0.0160487	0.0390261	0.0314659	-0.962083	-0.510033	0.336054	0.610188	0.525221	0.86209
CCL26	3057505	ILMN_1659601	4280301	-0.000131254	0.00098871	0.0257269	-0.0242251	0.0517248	0.0271299	0.497381	-0.892929	0.618942	0.372201	0.773116	0.727025
CCL27	3204261	ILMN_2113606	6280692	-0.000181828	0.000113971	-0.0173331	-0.0100539	0.0428609	0.0331797	-0.404404	-0.303014	0.685933	0.761969	0.82233	0.923343
CCL28	2855542	ILMN_1701347	7100762	0.00404698	0.000695444	0.235858	0.0217875	0.0505112	0.0290982	4.66942	0.748756	3.1e-06	0.454254	2.67e-05	0.782976
CCL5	3753860	ILMN_1773352	620717	-0.000103514	0.00125173	0.0157744	-0.00774221	0.0317043	0.0077048	0.49755	-1.00485	0.618823	0.315312	0.773048	0.678727
CCL7	3718177	ILMN_1683456	4610364	-0.000201491	2.3e-05	-0.00193459	-0.00512734	0.044714	0.0376581	-0.0432659	-0.136155	0.965491	0.891738	0.984725	0.966239
CCL8	3718191	ILMN_1772964	6620121	-0.000172916	0.00586246	-0.0077811	0.0486796	0.0369488	0.0223258	-0.210591	2.18042	0.833215	0.0295573	0.91333	0.196885
CCM2L	3881630	ILMN_1748206	2900239	0.00281571	4e-12	-0.402379	2.36e-06	0.10744	0.0415636	-3.74517	5.68e-05	0.000182283	0.999955	0.00107147	0.999955
CCNA1	3485674	ILMN_2157099	7400279	0.00441516	0.00317443	-0.297918	0.0576158	0.0639746	0.0359651	-4.65682	1.60199	3.29e-06	0.109606	2.82e-05	0.407641
CCNA2	2784113	ILMN_1786125	2650608	0.000245468	0.00169162	0.0666432	0.0297057	0.0566138	0.0254232	1.17715	1.16845	0.23919	0.243022	0.419051	0.606801
CCNB1	2813414	ILMN_1712803	4590040	-0.000200276	1.85e-07	0.0170749	0.000339039	0.0516572	0.0277504	0.330543	0.0122174	0.741003	0.990256	0.857	0.996374
CCNB2	3595979	ILMN_1801939	5360070	0.000185018	0.00310685	0.0749273	0.0333994	0.0420018	0.021075	1.78391	1.58479	0.0744985	0.113464	0.177951	0.413314
CCNB3	3977347	ILMN_1754746	1770239	0.000431499	0.000439113	0.0889224	-0.0238206	0.0574739	0.0400422	1.54718	-0.594886	0.121883	0.552111	0.257574	0.834736
CCNC	2966371	ILMN_2409395	2370204	0.00211341	0.00411895	-0.167267	0.0386605	0.0518858	0.0211744	-3.22375	1.82582	0.00127328	0.0683021	0.00600979	0.320439
CCND1	3338192	ILMN_1688480	5820601	-0.000178915	0.000665172	0.0317369	-0.0232097	0.0795618	0.0316956	0.398896	-0.732266	0.689987	0.46425	0.824503	0.788251
CCND2	3401704	ILMN_1667081	1570348	0.0134274	0.000132956	0.435273	-0.00551189	0.0551244	0.0168414	7.8962	-0.327283	3.5e-15	0.743551	1.24e-13	0.915573
CCNE1	3828112	ILMN_1733419	6590093	-0.000106714	1.02e-06	0.0441675	-0.000583839	0.0640622	0.0203233	0.689446	-0.0287276	0.490574	0.97709	0.669546	0.99266
CCNE2	3145107	ILMN_2412384	4760154	0.000863958	0.00297327	-0.120825	0.0501019	0.0577775	0.0323191	-2.09121	1.55022	0.0365589	0.121538	0.10111	0.429993
CCNF	3644764	ILMN_1773119	3130541	-4.57e-05	0.00326642	-0.0954462	-0.0380209	0.0951677	0.0233957	-1.00293	-1.62512	0.315944	0.104584	0.502857	0.397592
CCNG1	2838598	ILMN_1694491	3170110	0.00105846	0.000791164	0.14569	0.0146581	0.0636243	0.0183531	2.28984	0.798668	0.0220717	0.424752	0.0674008	0.763343
CCNG2	2732391	ILMN_1879480	4480537	0.0232235	0.00268607	-0.684066	-0.035303	0.0653043	0.0239633	-10.4751	-1.47321	2.05e-25	0.141143	2.24e-23	0.463784
CCNI	2774365	ILMN_1691942	5810605	0.0292862	0.00212036	0.572452	0.0208213	0.0472161	0.0159125	12.1241	1.30849	2.28e-33	0.191136	4.91e-31	0.536499
CCNJ	3259400	ILMN_2206812	6110433	-0.000181715	0.000114503	-0.0138765	-0.00751721	0.0666903	0.0247504	-0.208074	-0.303721	0.83518	0.761431	0.914031	0.92316
CCNK	3551303	ILMN_1689123	1010053	0.00104324	0.0185251	0.122691	-0.0828412	0.0529233	0.0212164	2.31828	-3.90459	0.0204736	0.00010348	0.0632421	0.0032304
CCNL1	2702307	ILMN_2094776	450554	0.0036175	0.00510488	-0.350952	-0.0341922	0.0768251	0.0168122	-4.56819	-2.03378	5.04e-06	0.0423492	4.15e-05	0.243004
CCNL2	2391532	ILMN_2379226	2340047	0.00733618	0.00156377	-0.191906	-0.0275314	0.0312236	0.0245085	-6.14619	-1.12334	8.55e-10	0.261675	1.39e-08	0.628019
CCNO	2857112	ILMN_1723794	4810392	-0.000226465	0.000225104	-0.0302211	0.0124795	0.0658089	0.0293032	-0.459225	0.425877	0.646092	0.670328	0.795189	0.887047
CCNT1	3453218	ILMN_1817255	1340669	0.000291584	7.76e-05	-0.111782	-0.00579558	0.0610184	0.0231776	-1.83194	-0.250051	0.0670196	0.802621	0.163711	0.939956
CCNT2	2507209	ILMN_1787877	4120390	0.00635546	0.0163085	-0.425531	0.050196	0.0736055	0.0137192	-5.78124	3.65881	7.86e-09	0.000272345	1.1e-07	0.00672491
CCNY	3242425	ILMN_2261784	5310605	-0.000202985	0.0100622	-0.00330741	-0.0460288	0.067563	0.0160741	-0.048953	-2.86353	0.960959	0.00431431	0.983114	0.0542667
CCP110	3651018	ILMN_1773200	5260082	0.000581034	0.00128093	-0.108876	0.0175053	0.0536401	0.0172207	-2.02975	1.01653	0.0424344	0.309728	0.114521	0.673201
CCR10	3758062	ILMN_1666493	1440176	-7.18e-06	0.00149735	-0.0240803	-0.0321251	0.0234072	0.0292263	-1.02875	-1.09918	0.303645	0.272064	0.490538	0.639168
CCR6	2936657	ILMN_1759635	5890398	0.0060971	6.52e-05	0.200013	0.00790079	0.037075	0.0344723	5.39482	0.229192	7.17e-08	0.818786	8.41e-07	0.945765
CCR7	3756319	ILMN_1715131	5390246	-0.000201648	0.00233074	0.00660242	-0.0102097	0.0349782	0.00744128	0.188758	-1.37203	0.85029	0.170492	0.9219	0.507892
CCRN4L	2744501	ILMN_1689378	460484	0.00107793	0.00342089	0.209828	-0.050283	0.064411	0.0302317	3.25765	-1.66325	0.00113083	0.0967073	0.00540308	0.382198
CCS	3336351	ILMN_2290998	1110255	-0.00010985	0.0023258	-0.0432123	0.023659	0.0551975	0.0172622	-0.782866	1.37057	0.433742	0.170946	0.619706	0.508501
CCSAP	2459793	ILMN_1699217	4830128	0.000822748	0.000374431	-0.141845	-0.0148639	0.0706633	0.0270593	-2.00734	-0.549308	0.0447671	0.582969	0.119056	0.851127
CCSER2	3255402	ILMN_2129388	4920327	0.00112649	0.00166885	0.145561	0.0182352	0.0613168	0.0157127	2.37392	1.16054	0.0176377	0.246222	0.0559154	0.610741
CCT2	3421630	ILMN_1679382	7100288	-0.000109842	0.0141569	-0.0446392	0.0602555	0.0612838	0.017698	-0.728402	3.40465	0.466402	0.000700112	0.648527	0.0141549
CCT3	2438125	ILMN_2334989	7650484	0.00583123	0.000539742	0.364776	-0.0129271	0.0682726	0.0195991	5.34294	-0.659575	9.55e-08	0.509743	1.09e-06	0.811092
CCT4	2555630	ILMN_1776073	6290014	0.00298131	0.000147574	0.254896	-0.00915464	0.0682051	0.0265499	3.7372	-0.344809	0.000188137	0.730341	0.00110426	0.910282
CCT5	2801526	ILMN_1706246	540170	-0.000196248	0.000806337	0.00377796	0.0205458	0.0562508	0.0254816	0.0671628	0.806298	0.946455	0.420344	0.976437	0.760821
CCT6A	3003193	ILMN_1722502	5820392	-0.000122499	0.000689124	-0.0421952	0.0166252	0.055004	0.0223054	-0.767131	0.745344	0.44304	0.456313	0.628148	0.783764
CCT6B	3753288	ILMN_1699610	1230612	0.000278081	0.00309374	-0.0976326	-0.0420468	0.0522872	0.0265879	-1.86724	-1.58143	0.0619263	0.11423	0.154049	0.4151
CCT7	2488732	ILMN_1662954	7160719	0.000357692	0.000566642	0.108362	0.011625	0.0640958	0.0172013	1.69063	0.675821	0.0909702	0.499376	0.206361	0.806226
CCT8	3928070	ILMN_1717868	3520156	0.00116027	7.53e-05	-0.15609	-0.00427671	0.056315	0.0173607	-2.77173	-0.246344	0.0055963	0.805488	0.0212999	0.940516
CCT8L2	3951493	ILMN_1727272	4150523	-0.00015715	0.000383952	0.0338178	0.0153967	0.0387033	0.0276794	0.873772	0.556251	0.382284	0.578216	0.573022	0.848237
CD101	2353749	ILMN_1799278	1400369	0.00357016	1.03e-05	0.188556	-0.00295039	0.0465983	0.0324115	4.04641	-0.0910294	5.28e-05	0.927495	0.000350787	0.978747
CD109	2913694	ILMN_1680364	4230292	0.000165863	0.00401831	0.131618	0.0713138	0.0995767	0.039547	1.32177	1.80327	0.186304	0.0717741	0.351765	0.327748
CD151	3316344	ILMN_1661589	1940132	0.000522647	0.0022505	-0.109672	0.0253005	0.060811	0.0187669	-1.80349	1.34814	0.0713703	0.178046	0.172037	0.518978
CD160	2432714	ILMN_1742001	2190019	0.00440437	1.19e-05	0.18398	0.000783265	0.034666	0.00799453	5.30722	0.097975	1.16e-07	0.92198	1.31e-06	0.977631
CD163	3442706	ILMN_1722622	20593	0.00394767	0.00518846	-0.177922	-0.0310942	0.0393623	0.0151645	-4.52011	-2.05046	6.32e-06	0.0406901	5.11e-05	0.23812
CD163L1	3442641	ILMN_1802780	240220	0.000515888	0.000162592	-0.149749	0.0144533	0.0876833	0.0399338	-1.70784	0.361932	0.0877276	0.717512	0.200969	0.903119
CD164L2	2403099	ILMN_1714118	1740180	-0.000159713	0.000556321	-0.0287952	0.0162113	0.0703747	0.0242092	-0.40917	0.669634	0.682432	0.503311	0.82036	0.808653
CD177	3835035	ILMN_1774071	1300465	-0.000192007	0.00366854	-0.00942628	0.0554609	0.0518984	0.032195	-0.18163	1.72265	0.855881	0.085391	0.924302	0.360823
CD180	2860178	ILMN_1665647	4120068	0.00476023	0.000849096	0.165267	0.0197652	0.0311235	0.0238877	5.31003	0.82742	1.14e-07	0.40828	1.3e-06	0.753185
CD19	3655109	ILMN_1782704	7210136	-6.18e-05	0.000146908	0.0766799	0.00295419	0.0758485	0.00858702	1.01096	0.344029	0.312084	0.730927	0.499218	0.910542
CD1A	2362180	ILMN_1723520	870156	0.000712853	0.000215546	0.0917604	-0.00970202	0.0480916	0.023281	1.90803	-0.416735	0.0564437	0.676999	0.143038	0.889232
CD1B	2439286	ILMN_1726230	6270202	-0.000177509	2.55e-05	0.0204763	-0.00305292	0.0335724	0.0212883	0.609917	-0.143408	0.541945	0.886009	0.715429	0.964893
CD1C	2362201	ILMN_1654210	1500725	0.0061755	0.000363145	-0.180313	-0.0147877	0.0335215	0.0273359	-5.37901	-0.540962	7.83e-08	0.588705	9.1e-07	0.852867
CD1D	2362157	ILMN_1719433	6400358	0.000756903	0.00646923	-0.114032	-0.0305785	0.0537204	0.0133456	-2.1227	-2.29128	0.0338279	0.0222421	0.0950177	0.163028
CD2	2353669	ILMN_1653198	2650279	0.00610121	0.000208745	0.203528	-0.0100113	0.0386254	0.0244114	5.26927	-0.410106	1.43e-07	0.681853	1.59e-06	0.891432
CD200	2636125	ILMN_1787750	7330452	0.00346615	0.000200962	0.13368	-0.0109309	0.0317493	0.0271653	4.2105	-0.402387	2.59e-05	0.687522	0.000183	0.892842
CD200R1	2688955	ILMN_2408112	4280523	0.00350235	0.000848642	-0.194466	-0.0221949	0.0430252	0.0268314	-4.51981	-0.827199	6.33e-06	0.408405	5.11e-05	0.753185
CD200R1L	2688933	ILMN_1657358	3780431	0.00240626	0.000567555	-0.162061	-0.0192385	0.0445503	0.0284439	-3.6377	-0.676366	0.000277832	0.499031	0.00156589	0.806075
CD207	2558876	ILMN_1718754	3830678	-0.000202955	0.00116303	-0.0221778	-0.0248635	0.0681608	0.0256708	-0.325375	-0.96855	0.744911	0.333103	0.859622	0.694086
CD209	3848540	ILMN_1676372	2640037	0.00110452	0.000274651	-0.136846	0.0171864	0.0518646	0.0365335	-2.63853	0.47043	0.00835227	0.638194	0.0300164	0.873876
CD22	3830359	ILMN_1792075	1010754	0.00556181	3.72e-05	0.167869	0.00379719	0.0289625	0.0219472	5.79608	0.173015	7.2e-09	0.862689	1.01e-07	0.957253
CD226	3812385	ILMN_1687825	3940754	0.000454732	0.00408362	0.0715309	0.0359059	0.0435299	0.019751	1.64326	1.81793	0.100392	0.0695002	0.222253	0.323231
CD24	4035833	ILMN_2060413	610437	0.00255708	0.000455171	0.11328	0.00439304	0.0276003	0.00725318	4.10431	0.605671	4.12e-05	0.544929	0.000278862	0.830932
CD244	2440385	ILMN_1702534	5860224	-7.71e-05	3.59e-05	-0.0223907	0.00359044	0.0529371	0.0211171	-0.422969	0.170025	0.672336	0.865039	0.813418	0.958176
CD247	2442587	ILMN_1676924	6290400	0.00499226	0.00469138	0.277319	-0.0241098	0.0516276	0.0123691	5.37153	-1.9492	8.16e-08	0.0516685	9.46e-07	0.271883
CD248	3378183	ILMN_1726589	2490113	0.00282898	0.00135321	-0.150369	-0.0212529	0.0405706	0.0203405	-3.70636	-1.04486	0.000212514	0.296449	0.00123352	0.660883
CD27	3402506	ILMN_1688959	1240450	-1.31e-05	0.00434378	0.0434523	-0.0197224	0.0520447	0.0105173	0.834903	-1.87523	0.403812	0.0611757	0.592901	0.299297
CD274	3161082	ILMN_1701914	4900239	0.00364622	0.000694721	0.0724055	-0.0255965	0.0192689	0.0342031	3.75762	-0.748367	0.000173471	0.454489	0.00102417	0.783042
CD276	3601229	ILMN_2365307	5900575	1.36e-06	0.00025541	-0.0855555	-0.0138751	0.0832807	0.0305856	-1.02732	-0.453648	0.304321	0.650222	0.491301	0.877532
CD28	2523801	ILMN_1822333	7160369	0.00224514	0.000137062	0.145293	0.00659294	0.0394444	0.0198404	3.68348	0.332299	0.000232479	0.739763	0.00133526	0.914401
CD2AP	2909404	ILMN_1730433	3140646	0.00781095	0.00837695	0.248278	0.0602316	0.0396193	0.0230755	6.26659	2.6102	4e-10	0.00924164	6.87e-09	0.0917313
CD2BP2	3687698	ILMN_1796244	2490066	0.0140333	0.0374469	-0.356596	-0.110986	0.0443116	0.0197697	-8.04746	-5.61394	1.05e-15	2.85e-08	3.89e-14	4.58e-06
CD300A	3734379	ILMN_1693552	4780196	0.00019268	0.00214249	-0.0981182	-0.0205667	0.0488502	0.0156363	-2.00855	-1.31531	0.0446378	0.188834	0.118817	0.533798
CD300C	3770305	ILMN_1701906	3120091	0.000578131	0.00540595	0.121451	-0.0273513	0.0733973	0.0130664	1.65471	-2.09325	0.0980456	0.0366844	0.218181	0.223369
CD300E	3770345	ILMN_1751095	2640674	-0.000184128	0.000105667	-0.00444476	0.0102918	0.0529008	0.0352742	-0.0840207	0.291764	0.933043	0.770553	0.970149	0.926386
CD300LB	3770290	ILMN_1782741	4610110	0.00075753	0.00785477	-0.0854376	-0.0428529	0.0444428	0.0169595	-1.92242	-2.52677	0.0546093	0.0117298	0.139416	0.107405
CD300LF	3770361	ILMN_2112357	4540228	0.00560746	0.00295715	-0.357392	-0.0229895	0.067641	0.0148703	-5.28366	-1.546	1.32e-07	0.122554	1.48e-06	0.430673
CD300LG	3722656	ILMN_2174805	4040341	-0.000217494	7.17e-05	-0.0124947	0.00824996	0.0929313	0.0343378	-0.134451	0.240259	0.893052	0.8102	0.944551	0.941729
CD320	3848871	ILMN_2115633	2340327	0.000578958	0.00141338	0.165711	-0.0156712	0.0802012	0.0146752	2.0662	-1.06787	0.0388608	0.285947	0.106571	0.650678
CD34	2453307	ILMN_2341229	4040706	0.000815627	2.61e-05	0.198001	0.00395507	0.0815371	0.0272628	2.42835	0.145072	0.0152025	0.884696	0.0495911	0.964774
CD38	2719656	ILMN_2233783	2760500	0.0152355	5.62e-06	0.439687	-0.00103414	0.0497966	0.0153727	8.82965	-0.067271	1.43e-18	0.946385	7.53e-17	0.984116
CD3D	3393744	ILMN_2261416	1170671	0.0024983	0.016951	0.128936	0.0376687	0.0384748	0.0100946	3.35118	3.73159	0.00081059	0.000205637	0.004058	0.00544599
CD3E	3351280	ILMN_1739794	1780600	-0.000130892	0.00265882	0.0181028	-0.0200104	0.0386535	0.0136525	0.468335	-1.46569	0.639565	0.143179	0.790275	0.46693
CD3EAP	3836243	ILMN_1747870	5220400	-0.000197882	0.0065643	-0.000952665	0.0764693	0.0942913	0.0331297	-0.0101034	2.30818	0.991939	0.0212784	0.996737	0.15847
CD3G	3351300	ILMN_1717197	1090474	0.00994157	0.0168605	0.240949	0.0443772	0.0353957	0.0119248	6.8073	3.72141	1.11e-11	0.000213937	2.44e-10	0.00562869
CD40	3887302	ILMN_1779257	6420520	0.000908513	0.000867141	0.130265	0.0195261	0.0602241	0.0233516	2.163	0.836175	0.0305881	0.403341	0.0876962	0.749973
CD40LG	3992575	ILMN_1659077	50706	0.00255609	0.000953354	0.144339	-0.0135022	0.0401677	0.0153994	3.59342	-0.876801	0.000329483	0.380894	0.00182625	0.732335
CD46	2377427	ILMN_2307744	1050482	0.0101342	0.000810642	-0.477733	0.0095518	0.0682679	0.011815	-6.99792	0.808449	2.94e-12	0.419105	6.98e-11	0.760138
CD47	2687739	ILMN_2356991	6270286	-0.000199831	0.000251331	0.00404137	0.00594752	0.0772587	0.0132164	0.0523096	0.45001	0.958284	0.652842	0.982082	0.878902
CD48	2440354	ILMN_2061043	2030767	-0.000127133	0.0130643	0.0210918	0.0388723	0.0615385	0.0118929	0.342741	3.26854	0.731807	0.00113364	0.850625	0.0203887
CD5	3332729	ILMN_1753112	5050347	-0.000135149	0.00335795	0.0188255	-0.0231198	0.0576345	0.0140305	0.326637	-1.64782	0.743956	0.0998356	0.859085	0.388446
CD52	2326463	ILMN_2208903	20129	-0.000188953	0.0164573	-0.00811168	0.02599	0.0481454	0.0070706	-0.168483	3.67578	0.86621	0.000255186	0.930786	0.00642904
CD53	2351572	ILMN_2413808	460102	0.000411351	0.0148843	0.156553	-0.063572	0.0791348	0.0182024	1.97831	-3.4925	0.0479485	0.00050846	0.125604	0.0109605
CD59	3368707	ILMN_2333687	1430240	0.00200844	4.19e-05	0.159771	-0.00453956	0.0467539	0.0247084	3.41728	-0.183726	0.000637508	0.854282	0.00328102	0.954631
CD6	3332663	ILMN_1746565	6590228	0.000499055	0.00674888	0.128169	-0.0302705	0.0793862	0.0129325	1.61451	-2.34066	0.10648	0.0195284	0.232823	0.150844
CD63	3457160	ILMN_1753468	3520167	0.00253563	0.00664931	-0.293559	-0.0387277	0.0814725	0.01667	-3.60317	-2.32319	0.000317387	0.0204531	0.00177225	0.154714
CD68	3708858	ILMN_2359907	4570438	0.00169683	0.00478871	0.196841	-0.0227984	0.0695327	0.0115762	2.83091	-1.96943	0.00465998	0.049296	0.0182789	0.264093
CD69	3443868	ILMN_2188333	2710575	-4.13e-06	0.0167762	-0.0382848	0.0359507	0.033387	0.00968522	-1.1467	3.71192	0.25156	0.000221966	0.432733	0.00580193
CD7	3774883	ILMN_1792538	6330091	2.39e-05	0.010827	-0.0692975	-0.0337431	0.0921684	0.0113549	-0.751857	-2.97167	0.452172	0.00306293	0.636304	0.0422776
CD70	3847989	ILMN_1760247	4220068	-0.000167971	7.38e-05	0.019845	0.00664017	0.0867951	0.0272416	0.228642	0.243751	0.819156	0.807495	0.906496	0.94097
CD72	3204648	ILMN_1723004	4200546	0.00184163	0.000668231	0.124383	0.0112403	0.0356075	0.0153149	3.49316	0.733949	0.000481432	0.463224	0.00256388	0.787983
CD74	2881370	ILMN_1761464	4560047	-4.97e-07	0.00443208	-0.0474196	-0.0217242	0.0547742	0.0114683	-0.865729	-1.89429	0.38668	0.0585972	0.576813	0.2925
CD79A	3834502	ILMN_2410371	6840471	-0.000217813	0.00119293	0.016375	0.0216294	0.0287603	0.0220498	0.569363	0.980935	0.569135	0.326962	0.737018	0.689395
CD79B	3766533	ILMN_1785439	4260725	-0.000209189	0.00110577	0.00880018	0.0092949	0.0527217	0.0098424	0.166917	0.944374	0.867442	0.345303	0.931279	0.705118
CD80	2690900	ILMN_1716736	5390239	-4.1e-05	1.94e-06	-0.0427751	0.000918153	0.0552225	0.0232098	-0.774595	0.0395589	0.438615	0.968456	0.624225	0.989866
CD82	3328520	ILMN_1662973	5130136	0.00553675	0.000603916	-0.321453	-0.012707	0.0626803	0.0182124	-5.12845	-0.69771	3.03e-07	0.485589	3.2e-06	0.799365
CD83	2895841	ILMN_1780582	5050162	0.0048816	6.92e-05	0.323801	-0.00535058	0.0578944	0.0226594	5.59296	-0.23613	2.35e-08	0.8134	3.02e-07	0.943248
CD84	2440295	ILMN_1698367	4060095	0.00632841	0.000843446	0.277761	-0.0138619	0.050656	0.0168093	5.48329	-0.82466	4.38e-08	0.409844	5.35e-07	0.753873
CD86	2638789	ILMN_1672097	4570368	-0.000209043	0.00166245	0.00404034	0.0409755	0.0465246	0.0353753	0.0868432	1.15831	0.9308	0.247132	0.968662	0.611989
CD8A	2562932	ILMN_1768482	670369	-0.000190604	0.00492448	-0.00523016	-0.0123001	0.0521578	0.00615831	-0.100276	-1.99731	0.920129	0.0461765	0.961389	0.254626
CD8B	2562965	ILMN_1669005	2490014	7.03e-05	0.000777608	0.0337341	0.0304657	0.028853	0.038477	1.16917	0.791791	0.24239	0.42875	0.423119	0.765398
CD9	3402315	ILMN_1695423	6250487	0.00241913	0.0021741	-0.143562	-0.0152158	0.0371913	0.0114835	-3.86009	-1.32501	0.000114761	0.185599	0.000706025	0.529358
CD93	3901055	ILMN_1704730	6100615	0.00640408	0.00794456	-0.238274	-0.0255517	0.0413354	0.0100546	-5.76441	-2.54131	8.68e-09	0.0112576	1.2e-07	0.104349
CD96	2635741	ILMN_1711573	2710754	0.00887806	0.00309143	0.373949	-0.0273223	0.0576771	0.0172835	6.4835	-1.58083	9.82e-11	0.114366	1.87e-09	0.415342
CD97	3822657	ILMN_1673363	6960630	-0.00012179	0.0129125	0.0374701	-0.0344163	0.0611955	0.0105922	0.612302	-3.24921	0.540365	0.00121234	0.714288	0.0214519
CD99L2	4025771	ILMN_1700681	1780079	0.00610015	0.000305483	-0.384784	0.0107175	0.0693606	0.0216017	-5.54759	0.496142	3.04e-08	0.619949	3.84e-07	0.866032
CDA	2324084	ILMN_1714592	5090372	0.00330367	0.00811368	-0.146508	-0.0234164	0.0404255	0.0091169	-3.62415	-2.56846	0.000292774	0.0104204	0.00164395	0.0989482
CDADC1	3489350	ILMN_1763878	6270390	0.000303998	0.00156257	-0.10351	0.0320042	0.0550436	0.0285011	-1.88051	1.12291	0.060096	0.261858	0.150365	0.62808
CDAN1	3620741	ILMN_1805180	510386	0.000225683	2.76e-05	-0.223985	-0.00466942	0.128324	0.0313003	-1.74547	-0.149182	0.0809641	0.881453	0.189459	0.964053
CDC123	3235461	ILMN_1678605	6100301	0.00284986	0.00274155	-0.232588	-0.0279117	0.0604615	0.0187529	-3.84689	-1.48839	0.000121103	0.137096	0.000738883	0.458
CDC14B	3216356	ILMN_1687074	540113	0.00199031	0.00492443	0.218536	0.0627352	0.0693334	0.03141	3.15197	1.9973	0.00163126	0.0461776	0.00740364	0.254626
CDC16	3503164	ILMN_1727389	4880521	0.00339346	0.000619519	0.200868	-0.013537	0.051009	0.019156	3.93789	-0.706672	8.33e-05	0.480004	0.000532277	0.796028
CDC20	2333136	ILMN_1663390	1500010	0.000200689	4.11e-05	0.0339005	0.00273297	0.0214034	0.0150162	1.58388	0.182001	0.113283	0.855634	0.244154	0.955462
CDC20B	2857042	ILMN_1787292	7050184	0.000132916	0.00038996	0.104554	0.0171839	0.0885988	0.0306533	1.18009	0.560588	0.238022	0.575257	0.417369	0.847131
CDC23	2877314	ILMN_1799688	1470750	-0.000192046	0.00516621	-0.028797	-0.0503103	0.0670396	0.0245892	-0.429552	-2.04603	0.66754	0.0411252	0.81069	0.239153
CDC25A	2673085	ILMN_1733396	4670670	0.000671283	0.00274997	0.163741	0.0405129	0.083838	0.0271774	1.95306	1.49068	0.0508677	0.136493	0.13162	0.456619
CDC25B	3874438	ILMN_2338323	4760338	0.000414993	7.3e-05	0.0929293	0.00367982	0.0756944	0.0151715	1.22769	0.242549	0.219621	0.808426	0.395876	0.941148
CDC25C	2877378	ILMN_2407619	4200451	-0.000183447	0.000110392	-0.005075	0.0100647	0.0368839	0.0337495	-0.137594	0.298217	0.890567	0.765626	0.943995	0.925314
CDC27	3760625	ILMN_1746533	6550537	0.00269672	5.24e-06	0.162372	-0.00208117	0.0441743	0.0320405	3.67571	-0.0649544	0.000239649	0.948229	0.00137064	0.984373
CDC34	3814978	ILMN_1713006	1710278	0.0196965	0.0399017	0.276233	0.0394225	0.027825	0.00679281	9.92753	5.80356	5.13e-23	9.82e-09	4.68e-21	1.75e-06
CDC37L1	3160735	ILMN_1764185	3130064	0.00432744	0.00527733	-0.279641	0.0766486	0.0621492	0.0370633	-4.49951	2.06805	6.96e-06	0.0390008	5.58e-05	0.232212
CDC40	2921086	ILMN_1737651	2810594	0.00165064	0.00669299	-0.204503	0.0436572	0.0750946	0.01873	-2.72327	2.33087	0.0064862	0.0200421	0.0241082	0.153046
CDC42	2324634	ILMN_1738424	5270386	0.000426816	0.000272641	-0.105797	-0.00574916	0.0512285	0.0122661	-2.0652	-0.468705	0.038955	0.639426	0.106781	0.873876
CDC42BPB	3580498	ILMN_1689989	4200703	0.000872841	0.00109529	0.2021	0.0299112	0.0959291	0.0318243	2.10677	0.939885	0.0351871	0.3476	0.0981492	0.707146
CDC42BPG	3377177	ILMN_1692342	940370	0.000689686	0.000206755	-0.234694	0.0123311	0.134681	0.0302124	-1.74259	0.408146	0.0814662	0.683291	0.190246	0.891571
CDC42EP1	3944758	ILMN_2401964	5420259	0.000530669	0.00209621	-0.139991	0.0490403	0.0724646	0.0376944	-1.93186	1.301	0.0534329	0.193686	0.136942	0.53926
CDC42EP5	3870895	ILMN_1774982	3370730	0.000307638	2.74e-05	-0.0785699	-0.00622206	0.0801386	0.0419167	-0.980425	-0.148439	0.326923	0.882039	0.514505	0.964053
CDC42SE1	2434776	ILMN_2349138	4480192	-0.000198135	0.0013693	-3.6e-05	-0.0107134	0.0681128	0.010193	-0.000528607	-1.05106	0.999578	0.293593	0.999795	0.658563
CDC42SE2	2828146	ILMN_1735594	2570767	0.00989513	0.000389062	-0.330473	-0.00947231	0.047998	0.0169166	-6.88514	-0.559941	6.48e-12	0.575698	1.46e-10	0.847156
CDC45	3936913	ILMN_1670238	2320170	-0.000186594	0.0012413	-0.00543643	0.0300452	0.0766344	0.0300256	-0.0709398	1.00065	0.943448	0.317338	0.974819	0.680535
CDC5L	2908572	ILMN_1652907	6760189	0.00158965	0.00150446	-0.170213	0.0193895	0.0605817	0.0175981	-2.80964	1.10179	0.00497872	0.270928	0.0193094	0.637511
CDC6	3720896	ILMN_1785914	510445	-2.84e-05	0.000305955	0.0364885	-0.0188318	0.0443039	0.0379271	0.823596	-0.496525	0.410208	0.619679	0.598717	0.865754
CDC7	2346399	ILMN_1741801	4900044	-0.00012946	0.00119677	0.0452673	0.0227218	0.0470822	0.0231262	0.961454	0.982514	0.33637	0.326185	0.52544	0.688358
CDC73	2372967	ILMN_1701614	4120184	4.81e-05	0.00219169	-0.0912937	0.0482296	0.0781829	0.0362528	-1.16769	1.33037	0.242986	0.183829	0.42373	0.526441
CDCA2	3090697	ILMN_1660654	2940398	0.000182749	0.000181121	0.12645	-0.0152647	0.089802	0.0399598	1.4081	-0.382003	0.159163	0.702575	0.314566	0.899588
CDCA3	3442322	ILMN_1737728	6370474	0.000221517	0.000117672	0.0673526	-0.0121704	0.0606973	0.0395277	1.10965	-0.307895	0.267203	0.758253	0.450763	0.92138
CDCA5	3377423	ILMN_1683450	130022	-0.000115986	4.33e-05	-0.0394227	-0.00423939	0.0702243	0.0226914	-0.561382	-0.186828	0.574562	0.85185	0.741747	0.954631
CDCA7	2516023	ILMN_1737184	2070520	0.000378178	0.000405224	0.0957025	-0.00975621	0.0622838	0.0170725	1.53656	-0.571459	0.124465	0.567871	0.261563	0.843907
CDCA7L	3040897	ILMN_2230683	3800753	0.00559305	6.04e-05	0.202985	0.00473457	0.034692	0.0214622	5.85106	0.2206	5.19e-09	0.825468	7.44e-08	0.948497
CDCP1	2671728	ILMN_2341611	60215	-0.000229442	0.000188589	-0.0253111	0.0110444	0.0765028	0.0283337	-0.330852	0.3898	0.74077	0.696803	0.856914	0.89677
CDH1	3666409	ILMN_1770940	1300113	0.0107583	0.000220802	0.348664	-0.0173273	0.0471796	0.0410807	7.39015	-0.421787	1.71e-13	0.673309	4.81e-12	0.88773
CDH10	2851274	ILMN_1791270	2260424	-0.000153166	0.000330408	0.0264703	0.0147804	0.0772351	0.0286446	0.342723	0.515993	0.731821	0.606022	0.850625	0.860948
CDH12	2850964	ILMN_1709269	5090204	-0.000204945	0.00177443	0.0244767	-0.0332685	0.078254	0.0277987	0.312786	-1.19676	0.754456	0.231802	0.865635	0.591559
CDH13	3671202	ILMN_1766925	5820563	-0.000184782	0.00147108	0.023601	0.0445947	0.0764084	0.040932	0.30888	1.08948	0.757426	0.276314	0.867612	0.642406
CDH15	3673892	ILMN_1784036	5090195	-0.000181313	0.00236111	-0.0557509	0.0541701	0.0943265	0.0392262	-0.591041	1.38097	0.554519	0.167728	0.724986	0.503896
CDH16	3695315	ILMN_2095597	20762	-0.000188394	0.00042528	-0.0102796	0.0166767	0.0980433	0.0284859	-0.104848	0.585436	0.916501	0.558442	0.959249	0.839161
CDH17	3144859	ILMN_1814015	7050673	-0.00021137	0.000121329	-0.00765568	0.00843334	0.0842139	0.0269743	-0.0909075	0.312644	0.92757	0.754644	0.966469	0.920484
CDH18	2850676	ILMN_1733669	7330561	7.97e-05	0.00408196	-0.09311	-0.0560423	0.0803061	0.0308338	-1.15944	-1.81756	0.246332	0.0695568	0.42691	0.323277
CDH2	3802602	ILMN_1779228	1170709	0.00432547	0.000637939	-0.252286	-0.0141839	0.0576873	0.0197792	-4.37333	-0.717108	1.25e-05	0.473545	9.46e-05	0.79428
CDH20	3790982	ILMN_1775739	3370605	-0.000200403	0.000863926	-0.0124207	0.0218863	0.0762366	0.026223	-0.162923	0.834622	0.870586	0.404214	0.93299	0.750621
CDH22	3907711	ILMN_1753586	3520626	0.00037646	0.00269044	-0.16656	0.0513051	0.120394	0.034797	-1.38345	1.47441	0.166588	0.140819	0.324993	0.463624
CDH24	3557069	ILMN_1693928	4560382	0.00184202	0.00210625	-0.346612	0.0422585	0.108792	0.032404	-3.18602	1.30412	0.00145123	0.192621	0.00671039	0.538035
CDH3	3666366	ILMN_1704294	7610338	-0.000207977	0.000453228	0.00659003	0.0237264	0.107974	0.0392576	0.0610336	0.604377	0.951335	0.545788	0.978205	0.830932
CDH5	3664664	ILMN_1719236	4730482	-8.21e-05	0.00124377	-0.0729303	0.0402539	0.093754	0.0401875	-0.77789	1.00165	0.43667	0.316857	0.622629	0.68035
CDH6	2805078	ILMN_1766675	3800241	-0.000248524	9.18e-06	-0.0265431	0.00238807	0.0872451	0.027773	-0.304236	0.0859853	0.760961	0.931503	0.869596	0.980019
CDH8	3694215	ILMN_1757020	940193	-0.000122654	0.00219594	0.0577	-0.0384429	0.0682433	0.0288684	0.845504	-1.33166	0.397869	0.183404	0.587779	0.526441
CDH9	2851511	ILMN_1675454	2340274	-0.000189854	0.000437974	-0.0146132	0.0127058	0.0756704	0.0213861	-0.193117	0.594114	0.846875	0.552627	0.920267	0.834736
CDHR2	2842624	ILMN_1718173	4590692	-0.000161317	0.00124185	0.127663	-0.0342298	0.130316	0.0341999	0.979641	-1.00088	0.32731	0.317231	0.514775	0.680535
CDHR4	2674748	ILMN_1678714	5260482	0.00119519	0.00481826	0.188878	0.0641312	0.0691188	0.0324628	2.73265	1.97553	0.00630456	0.0485986	0.0235347	0.262372
CDIP1	3678186	ILMN_1815812	130709	0.000391074	0.00178081	-0.124486	-0.0336677	0.0777647	0.0280818	-1.6008	-1.19891	0.109483	0.230965	0.237493	0.590543
CDIPT	3687260	ILMN_1770425	990161	7.37e-05	0.000196616	-0.0686879	0.00658865	0.0609667	0.016554	-1.12665	0.398011	0.259946	0.690743	0.44211	0.894281
CDK11B	2391744	ILMN_1765704	4250739	-0.000196272	0.00135925	0.00171488	-0.0179173	0.0264476	0.01711	0.0648405	-1.04719	0.948304	0.295374	0.977006	0.659581
CDK12	3720228	ILMN_1707448	5860048	0.00958431	1.09e-06	0.329919	-0.000470738	0.0499452	0.0158511	6.60563	-0.0296974	4.37e-11	0.976317	8.73e-10	0.992564
CDK14	3012064	ILMN_2171295	6400553	0.00428344	0.000260229	-0.171974	-0.0115029	0.0381798	0.0251206	-4.50433	-0.457908	6.81e-06	0.64716	5.47e-05	0.876211
CDK17	3466826	ILMN_1780824	630524	0.00148513	0.00244437	-0.218018	-0.0337946	0.0724903	0.0240502	-3.00755	-1.40517	0.0026466	0.160413	0.0112891	0.492352
CDK19	2969467	ILMN_1676891	3930452	0.0100268	0.00494386	-0.438598	-0.0375412	0.0680606	0.0187588	-6.44423	-2.00126	1.27e-10	0.0457485	2.38e-09	0.253924
CDK2	3417146	ILMN_1665559	4590064	0.000123357	0.00181892	0.062548	-0.0255067	0.0570715	0.0210503	1.09596	-1.2117	0.27315	0.226034	0.457591	0.58311
CDK20	3213530	ILMN_2357730	1820739	-0.000176859	7.44e-05	0.0242529	-0.00697383	0.0885826	0.0284856	0.273789	-0.24482	0.784258	0.806668	0.884778	0.940815
CDK2AP2	3378934	ILMN_1690653	2100411	-0.000208258	0.00970628	0.00892149	-0.0462556	0.079726	0.0164503	0.111902	-2.81185	0.910906	0.00506311	0.9563	0.0610612
CDK3	3735364	ILMN_1767414	6280754	-7.08e-05	0.000820296	-0.0301346	-0.0236315	0.0578299	0.0290579	-0.52109	-0.813254	0.602327	0.416348	0.762336	0.757968
CDK4	3458783	ILMN_1689001	7380110	-0.000175896	0.0138953	0.0155729	-0.0695703	0.0583618	0.0206285	0.266833	-3.37253	0.789608	0.000785617	0.888059	0.0154181
CDK5	3079313	ILMN_1781987	3170674	-0.000146634	0.00338434	0.0190544	-0.032545	0.0453493	0.0196729	0.420169	-1.65431	0.67438	0.0985109	0.814583	0.385783
CDK5R2	2528198	ILMN_1717803	3420367	-0.000196299	0.00101976	0.110412	0.0259122	0.0852351	0.0285735	1.29538	0.90686	0.195247	0.364792	0.364087	0.722864
CDK5RAP3	3724989	ILMN_2383489	650601	0.00268126	0.00894382	-0.149463	-0.0454268	0.0387718	0.0168375	-3.85493	-2.69796	0.000117201	0.00714402	0.000719078	0.0771515
CDK6	3061319	ILMN_1802615	670286	0.0214834	0.00272771	0.647185	0.0257073	0.0626894	0.0173158	10.3237	1.48462	9.69e-25	0.138093	1.02e-22	0.459547
CDK7	2813481	ILMN_1778917	4760369	0.0107201	0.000440957	-0.305585	-0.0128749	0.0425388	0.0215973	-7.18368	-0.596134	7.78e-13	0.551277	2.02e-11	0.834312
CDK8	3482498	ILMN_1777913	4280520	0.00839036	0.00027881	0.271906	0.0181613	0.0433123	0.0383165	6.2778	0.47398	3.72e-10	0.635661	6.46e-09	0.872959
CDK9	3190035	ILMN_1747556	430767	0.00227391	0.00975587	-0.256233	-0.0576079	0.0769297	0.0204349	-3.33075	-2.8191	0.00087235	0.00495134	0.00431166	0.0600843
CDKAL1	2897635	ILMN_1788022	2230020	-1.38e-05	0.00578087	0.0452972	-0.0630458	0.0695412	0.0291192	0.651373	-2.16509	0.514835	0.0307165	0.692926	0.201378
CDKL1	3563861	ILMN_1724183	6900315	0.00421898	0.0262883	0.332289	0.123785	0.073242	0.0264916	4.53687	4.6726	5.84e-06	3.56e-06	4.75e-05	0.000213423
CDKL2	2773719	ILMN_1856533	2630280	-5.56e-05	0.000634195	0.0527554	-0.0210563	0.068976	0.0294494	0.764837	-0.715	0.444405	0.474847	0.62949	0.79504
CDKN1A	2905169	ILMN_1784602	4230201	0.00046818	0.00126052	-0.109474	0.0107601	0.059211	0.0106707	-1.84888	1.00838	0.0645343	0.313619	0.159157	0.676644
CDKN1B	3405440	ILMN_2196347	1030348	0.00295372	0.000867284	-0.231802	-0.00937529	0.052519	0.0112112	-4.41367	-0.836244	1.04e-05	0.403302	8e-05	0.749973
CDKN1C	3359432	ILMN_1718565	5890653	0.00107939	0.0069929	-0.177862	0.0255328	0.0690772	0.0107148	-2.57483	2.38293	0.0100572	0.01744	0.0350967	0.139173
CDKN2A	3201437	ILMN_1757255	5130671	0.000129287	0.000108703	-0.0850958	0.0122515	0.0801625	0.0414004	-1.06154	0.295926	0.288495	0.767374	0.474913	0.925921
CDKN2AIP	2753880	ILMN_1773066	5090440	0.00153346	0.00194938	-0.184121	0.0267986	0.0635904	0.021362	-2.89542	1.2545	0.00380281	0.210078	0.0153926	0.562937
CDKN2AIPNL	2876213	ILMN_2130078	7400224	0.000251657	0.0199723	0.0624766	-0.0504552	0.0412387	0.0124345	1.515	-4.05767	0.129835	5.51e-05	0.269837	0.00195281
CDKN2C	2335922	ILMN_2359332	6450095	0.000369343	0.00062911	0.112357	0.0187786	0.0636729	0.0263698	1.7646	0.712125	0.0776921	0.476624	0.183819	0.795229
CDKN2D	3850445	ILMN_1740597	1090333	0.000749119	0.000295386	-0.143543	0.0115754	0.0574754	0.0237264	-2.49746	0.487871	0.0125403	0.625794	0.0423991	0.869158
CDO1	2871896	ILMN_1753931	3780315	0.000117742	0.00025735	0.0573727	0.0131717	0.0569311	0.0289254	1.00776	0.455368	0.31362	0.648985	0.500612	0.877318
CDPF1	3963973	ILMN_1787288	460347	0.000124039	0.000303054	-0.097226	-0.0165738	0.0702755	0.033539	-1.3835	-0.494165	0.166574	0.621344	0.324993	0.867176
CDR1	4024373	ILMN_1655690	1030343	-0.000171099	1.94e-05	-0.0185344	0.00527339	0.0431555	0.0422362	-0.429481	0.124855	0.667592	0.900674	0.81069	0.968655
CDR2	3684782	ILMN_1720270	2140228	0.00674898	0.00105786	0.268082	-0.0165626	0.0479873	0.0179314	5.58653	-0.923664	2.44e-08	0.355978	3.11e-07	0.714209
CDR2L	3734560	ILMN_2128770	3940482	-0.000218028	0.000498594	0.046028	-0.0216437	0.0694549	0.0341427	0.662703	-0.633919	0.507551	0.52634	0.686419	0.820491
CDS1	2734270	ILMN_1801476	5860010	-0.000184467	0.00202171	0.0303901	0.0452075	0.0912295	0.0353843	0.333117	1.27761	0.73906	0.201807	0.855574	0.550549
CDS2	3874900	ILMN_1790973	510673	0.00741095	0.00873485	-0.355049	-0.0419059	0.0571975	0.0157191	-6.20742	-2.66593	5.82e-10	0.00785399	9.71e-09	0.0820821
CDT1	3673684	ILMN_1651237	2630433	0.000465313	0.00229242	-0.220941	0.0427296	0.102048	0.0314032	-2.16506	1.36068	0.0304299	0.174052	0.0873463	0.51317
CDV3	2643157	ILMN_1691106	6660575	0.00107235	0.000609837	0.190404	0.0121622	0.0716857	0.0173468	2.65609	0.701125	0.00793012	0.483457	0.0287657	0.797956
CDX1	2835368	ILMN_1815619	70184	-0.000170533	0.00398793	-0.0316138	0.0512624	0.0651223	0.0285361	-0.485454	1.79641	0.627376	0.0728591	0.780495	0.330803
CDX2	3507134	ILMN_1671058	2030397	-0.000262348	0.00101928	0.0407086	-0.0351094	0.0843153	0.0387246	0.482814	-0.906644	0.629249	0.364906	0.782099	0.722928
CDX4	3981592	ILMN_1722603	1770286	4.83e-05	0.00147616	-0.0427705	0.0400982	0.0432796	0.0367413	-0.988237	1.09137	0.323084	0.275486	0.510579	0.641842
CDYL	2892979	ILMN_1678075	1050114	0.0155799	0.000222908	0.626637	-0.01009	0.0718822	0.0238088	8.71755	-0.423794	3.8e-18	0.671846	1.91e-16	0.887155
CDYL2	3701297	ILMN_1777479	4830487	0.0042129	0.00326476	0.291656	-0.0416731	0.0651393	0.0256496	4.47742	-1.62471	7.72e-06	0.104673	6.11e-05	0.397592
CEACAM19	3835675	ILMN_1752335	3190400	3.85e-05	0.00068963	0.0666756	-0.0247973	0.0791339	0.0332574	0.842567	-0.745618	0.399511	0.456148	0.588965	0.783764
CEACAM20	3864944	ILMN_1774781	4220593	0.000503773	0.000293294	-0.16487	0.0189709	0.0766217	0.0390236	-2.15173	0.48614	0.0314656	0.62702	0.0896147	0.869958
CEACAM3	3834405	ILMN_1743570	1850139	0.00083953	0.0117827	0.108638	-0.0420306	0.0559809	0.0135505	1.94063	-3.10178	0.0523585	0.00200056	0.134582	0.0310255
CEACAM4	3863189	ILMN_1657455	6370646	0.00551391	0.0048717	-0.152429	-0.0376691	0.0293898	0.0189624	-5.18646	-1.98652	2.23e-07	0.0473638	2.4e-06	0.259779
CEACAM5	3834341	ILMN_1670959	2360632	0.000339438	0.000226375	-0.10458	-0.0130729	0.0619725	0.0306101	-1.68753	-0.427077	0.0915641	0.669454	0.207357	0.886521
CEACAM6	3834379	ILMN_1712522	7400377	0.00148666	0.00219475	0.118472	0.0109568	0.0338894	0.00823016	3.49584	1.3313	0.00047663	0.183522	0.00254245	0.526441
CEACAM7	3863214	ILMN_1813957	3400564	-0.000124012	0.00151934	-0.0272316	0.0426761	0.0462658	0.0385427	-0.58859	1.10724	0.556162	0.268568	0.726557	0.635805
CEACAM8	3863723	ILMN_1806056	4780075	0.0214724	0.00562611	0.229312	0.0123232	0.02035	0.00577005	11.2684	2.13572	4.17e-29	0.0330469	6.53e-27	0.209366
CEBPA	3858993	ILMN_1715715	1430280	0.000539989	0.00430673	-0.128799	-0.0282438	0.0605005	0.0151265	-2.12889	-1.86717	0.0333121	0.0622934	0.0938094	0.301824
CEBPA-AS1	3829300	ILMN_1697115	3930082	0.000344156	0.000126161	0.0332232	0.0088523	0.0197841	0.0277668	1.67929	0.318809	0.0931575	0.749966	0.210097	0.917751
CEBPB	3888613	ILMN_1693014	20446	0.00219894	0.00982694	-0.254013	-0.0411488	0.0713112	0.0145429	-3.56204	-2.82947	0.000371383	0.00479551	0.00202863	0.0587255
CEBPD	3134013	ILMN_1782050	5490408	0.0119179	0.0577842	-0.396685	-0.0900371	0.055369	0.0127528	-7.16438	-7.06019	8.94e-13	4e-12	2.3e-11	3.71e-09
CEBPE	3557198	ILMN_1779095	2940767	0.00167045	0.00504707	0.144615	-0.0293232	0.0454073	0.0145009	3.18484	-2.02216	0.00145715	0.043538	0.00672747	0.246911
CEBPZ	2548459	ILMN_1744147	4760373	0.00248499	0.0142957	-0.138023	0.0469161	0.0408986	0.0137118	-3.37475	3.42157	0.00074439	0.000658626	0.00375781	0.0133835
CECR2	3936167	ILMN_1671171	3460750	0.000354135	0.000101249	-0.179852	-0.00814457	0.104711	0.0285175	-1.71761	-0.285599	0.0859299	0.77527	0.197681	0.928063
CECR5	3951732	ILMN_1654690	1340470	-0.000215056	0.00816089	0.0120737	-0.0503564	0.0663639	0.0195483	0.181932	-2.576	0.855644	0.0101982	0.924271	0.097763
CECR6	3951719	ILMN_1702229	6200161	0.000692385	0.00694238	-0.180008	-0.0313118	0.0789419	0.0131881	-2.28026	-2.37424	0.0226337	0.0178526	0.0687512	0.141715
CEL	3192693	ILMN_1723418	6650593	-0.000100472	0.00175574	-0.0444739	-0.0331047	0.0638565	0.027809	-0.696466	-1.19043	0.486169	0.234279	0.665586	0.594829
CELA1	3454877	ILMN_1805902	2710309	0.000259453	0.00202432	-0.0551596	0.0301196	0.047358	0.0235597	-1.16474	1.27844	0.244181	0.201517	0.424549	0.550329
CELA2B	2321828	ILMN_1688458	6660634	0.000552334	0.000399104	-0.121556	-0.0222821	0.0616293	0.0392897	-1.97238	-0.567125	0.0486209	0.57081	0.127034	0.845418
CELA3B	2324571	ILMN_1749515	7510072	-0.000167411	9.38e-06	0.0567392	-0.00258914	0.0819531	0.0297883	0.692337	-0.0869179	0.488758	0.930762	0.66805	0.979877
CELF5	3816883	ILMN_1672871	6290307	4.31e-05	0.000489172	0.102825	0.0162948	0.102774	0.0259514	1.0005	0.627898	0.317116	0.530275	0.504056	0.822494
CELSR1	3964049	ILMN_1694482	2970598	1.57e-05	0.00139229	-0.123719	0.0305056	0.128933	0.0287827	-0.959557	1.05986	0.337324	0.289573	0.526523	0.654022
CELSR2	2350596	ILMN_1711208	3710240	-1.33e-05	3.54e-06	0.152144	-0.00164578	0.131524	0.0308105	1.15677	-0.0534161	0.247419	0.957416	0.427871	0.986095
CEMP1	3676913	ILMN_2280816	540400	0.00024933	0.00109287	-0.0390402	0.027474	0.0361937	0.0292637	-1.07864	0.938842	0.280798	0.348134	0.466156	0.707542
CENPA	2473991	ILMN_2392472	4760577	-0.000204584	0.00111917	-0.035732	-0.0377743	0.0578206	0.0397588	-0.61798	-0.950088	0.536616	0.342394	0.7112	0.703045
CENPB	3895722	ILMN_1664028	610056	0.000458607	0.018541	-0.124186	-0.0702906	0.0851788	0.0179942	-1.45794	-3.9063	0.144918	0.000102765	0.293737	0.00321641
CENPBD1	3705135	ILMN_1692072	6350075	0.00189774	0.00612969	0.15682	-0.047491	0.0503402	0.0212973	3.11521	-2.2299	0.00184845	0.0260688	0.0082484	0.180155
CENPC	2771654	ILMN_2229205	2810731	0.00553139	0.0026215	-0.223095	0.037864	0.041911	0.0260173	-5.32308	1.45534	1.06e-07	0.146021	1.21e-06	0.470973
CENPE	2780172	ILMN_1716279	6100564	-0.000199087	0.000737776	0.0199153	0.0215879	0.0550171	0.0279917	0.361984	0.771227	0.717379	0.440831	0.842842	0.774344
CENPF	2379863	ILMN_1664516	4780129	-0.000197581	0.00473734	-0.00519314	0.0546316	0.0618734	0.0278906	-0.0839318	1.95878	0.933114	0.0505336	0.970149	0.268259
CENPH	2813442	ILMN_1693221	7380711	6.55e-05	0.000452133	-0.0462081	0.015684	0.0468112	0.0259821	-0.987116	0.603646	0.323633	0.546274	0.511107	0.830932
CENPI	3984655	ILMN_2119307	2470360	-0.000188302	0.00352559	0.00509552	-0.0483583	0.0440684	0.0286378	0.115628	-1.68862	0.907952	0.0917361	0.95428	0.373144
CENPK	2859667	ILMN_1737195	5700086	0.000215061	8.07e-06	0.0325689	0.00176326	0.0213609	0.0218675	1.5247	0.0806339	0.127398	0.935756	0.266056	0.981107
CENPL	2444451	ILMN_1742779	4060468	-1.52e-05	0.000697168	0.0447988	-0.0208628	0.0521423	0.0278287	0.859163	-0.749685	0.390291	0.453695	0.580547	0.782906
CENPN	3670631	ILMN_1720526	3890475	0.00019755	0.00214095	0.0565928	0.0352595	0.040181	0.0268166	1.40845	1.31484	0.15906	0.188992	0.314566	0.533839
CENPO	2473284	ILMN_2219351	7160048	0.000117484	0.000130563	0.047892	0.0116464	0.0484061	0.0359099	0.98938	0.324323	0.322525	0.74579	0.51023	0.916048
CENPP	3179359	ILMN_1748241	6250196	-0.000181163	0.000649043	-0.00878654	0.0292695	0.0476328	0.0404651	-0.184464	0.723327	0.853657	0.46972	0.92343	0.791781
CENPQ	2909723	ILMN_1670769	2350630	0.00155171	0.000971963	-0.116431	0.0313687	0.0437886	0.0354318	-2.65894	0.885326	0.00786336	0.376283	0.028566	0.730354
CENPT	3695916	ILMN_1777129	6940554	0.000407354	0.000210926	-0.111791	0.00849726	0.0730843	0.0206122	-1.52962	0.412243	0.126174	0.680287	0.264142	0.890447
CENPV	3747199	ILMN_1729142	1030026	0.00315862	0.0250149	0.191903	0.0600756	0.0489413	0.0131901	3.92108	4.55461	8.93e-05	6.19e-06	0.000564112	0.000334065
CEP104	2393740	ILMN_2228453	6650288	0.0123438	0.00477949	0.506522	0.0502313	0.0655182	0.0255302	7.73102	1.96752	1.28e-14	0.0495157	4.26e-13	0.264479
CEP120	2873168	ILMN_1781077	7150370	0.000266771	4.42e-05	-0.133347	-0.0049872	0.0863987	0.0264318	-1.54339	-0.188682	0.1228	0.850396	0.258785	0.954411
CEP128	3573933	ILMN_1806825	3830164	0.00147303	0.000695439	-0.095284	0.0191539	0.0351218	0.0255811	-2.71296	0.748754	0.00669118	0.454256	0.024786	0.782976
CEP135	2727976	ILMN_1693766	270022	0.00133401	0.00102843	-0.137172	0.0165135	0.0551206	0.0181325	-2.48858	0.910711	0.0128574	0.36276	0.0432902	0.720616
CEP170B	3554452	ILMN_1664960	4180086	0.000377012	0.000853105	-0.0914917	-0.0317771	0.0605047	0.0383146	-1.51214	-0.829373	0.130561	0.407175	0.271064	0.752907
CEP19	2713016	ILMN_2288483	1850040	0.00173641	0.0172557	0.114489	-0.0529916	0.0301325	0.0140724	3.79954	-3.76564	0.000146671	0.000180013	0.000881051	0.00491872
CEP192	3779817	ILMN_1703754	4490154	0.000653159	0.00045492	0.115787	-0.0129723	0.0637759	0.0214239	1.81552	-0.605504	0.069503	0.54504	0.168353	0.830932
CEP250	3883309	ILMN_1799011	5700689	0.00817972	0.00934467	0.691782	-0.0707594	0.109609	0.0256524	6.31134	-2.75839	3e-10	0.00595961	5.27e-09	0.0676304
CEP290	3464622	ILMN_1746832	4780112	0.00438096	0.0080033	-0.239283	0.0806417	0.0541574	0.0316146	-4.41829	2.55077	1.02e-05	0.0109593	7.87e-05	0.102539
CEP350	2369843	ILMN_1742400	5340553	0.00121906	0.000829465	-0.141924	0.0140523	0.0647642	0.0171833	-2.1914	0.81779	0.0284686	0.413754	0.0826619	0.756561
CEP55	3258444	ILMN_1747016	7510709	-0.000140174	0.00195113	-0.0272906	0.0387988	0.0583848	0.0309138	-0.467427	1.25506	0.640214	0.209873	0.790734	0.562797
CEP57	3345593	ILMN_1791568	7100519	0.00162863	0.00179863	-0.174738	0.0250812	0.0641162	0.0208158	-2.72533	1.20491	0.00644582	0.228643	0.0239951	0.586361
CEP68	2485688	ILMN_1808500	1110039	-6.64e-05	0.000845772	0.0476565	-0.0185728	0.0770818	0.0224908	0.618258	-0.825798	0.536433	0.409199	0.711191	0.753525
CEP70	2697490	ILMN_1741350	4640242	-0.000175038	0.002673	0.0158914	0.0539508	0.0486426	0.036711	0.326697	1.46961	0.743911	0.142115	0.859085	0.465222
CEP72	2798777	ILMN_1800611	1030368	-1.34e-05	0.000839369	-0.0708732	-0.0178519	0.0886719	0.0217001	-0.799275	-0.822663	0.424169	0.410979	0.610661	0.754523
CEP85	2326410	ILMN_1812489	1990730	0.00678844	0.00380379	0.353771	-0.0401061	0.0611924	0.0228621	5.7813	-1.75426	7.86e-09	0.079822	1.1e-07	0.34784
CEP89	3858794	ILMN_1679971	4730215	0.00232218	0.000442079	0.227103	-0.0155605	0.0680658	0.0260692	3.33652	-0.596893	0.000854473	0.550771	0.0042372	0.834129
CEP95	3731228	ILMN_1686135	2070593	0.00153143	0.00111082	0.176865	-0.0214932	0.0612197	0.0227074	2.88901	-0.946529	0.003881	0.344204	0.0156775	0.704545
CEP97	2634027	ILMN_1736951	7400575	7.13e-05	8.39e-05	-0.0654872	-0.00710668	0.0548907	0.0273361	-1.19305	-0.259974	0.232907	0.79496	0.410828	0.935019
CER1	3199500	ILMN_1690192	4780242	-0.000189742	0.000394371	-0.00230512	0.0158627	0.0371266	0.0281378	-0.0620881	0.563751	0.950495	0.573103	0.978009	0.846818
CERCAM	3190420	ILMN_1750563	7550048	-0.000149817	0.00468203	0.0222012	-0.0586638	0.086269	0.0301265	0.257349	-1.94725	0.79692	0.0519025	0.892311	0.272517
CERK	3964154	ILMN_1767475	2230367	0.000161213	0.00183669	-0.0978023	-0.0236431	0.0802918	0.0194175	-1.21809	-1.21762	0.223248	0.223777	0.399842	0.580145
CERS2	2434716	ILMN_2400500	3370121	-4.98e-05	0.00555454	-0.0572048	-0.0437388	0.0750627	0.020612	-0.762094	-2.12201	0.44604	0.0341862	0.630917	0.213997
CERS3	3641777	ILMN_1743142	6510187	0.00026368	0.000265518	-0.0926893	0.0142169	0.066943	0.0307366	-1.3846	0.46254	0.166236	0.643837	0.324742	0.875205
CES2	3664982	ILMN_2362681	3850471	-7.82e-05	0.00307852	-0.110926	-0.0256595	0.114501	0.0162658	-0.968782	-1.57752	0.3327	0.115126	0.521535	0.416598
CES3	3665029	ILMN_2165975	1780470	-0.000173888	0.00251061	0.0471714	0.0133305	0.085947	0.00936044	0.548843	1.42414	0.583138	0.154851	0.748329	0.483646
CES4A	3665049	ILMN_1699852	5260019	0.00185329	0.00221644	0.236976	0.040038	0.071381	0.0299265	3.31988	1.33788	0.000906971	0.181369	0.004459	0.523694
CES5A	3692735	ILMN_1784870	1990246	0.000544168	0.00159011	-0.117494	-0.0304661	0.0568336	0.0268949	-2.06733	-1.13278	0.0387535	0.257692	0.106301	0.624032
CETN1	3775800	ILMN_1768624	3310500	7.95e-05	0.000689069	-0.03695	-0.0163062	0.0362204	0.0218783	-1.02014	-0.745314	0.307709	0.456331	0.49432	0.783764
CETN2	4026263	ILMN_1695645	2120707	-5.66e-05	0.00298128	-0.0298474	0.031413	0.0351893	0.0202362	-0.848195	1.55232	0.396369	0.121036	0.586187	0.429092
CETN3	2866543	ILMN_2224031	830136	0.00365453	0.000231668	-0.170441	0.00950843	0.0426425	0.0220081	-3.99698	0.432043	6.51e-05	0.665843	0.00042522	0.884505
CETP	3662417	ILMN_1681882	4230703	0.000796238	0.00189516	0.182629	0.034549	0.0852641	0.0279321	2.14192	1.23689	0.0322475	0.21654	0.0914961	0.571576
CFD	3815243	ILMN_1777190	1240152	0.00617683	0.000214685	-0.154928	-0.00179754	0.0275551	0.00432204	-5.62248	-0.415902	1.98e-08	0.677609	2.57e-07	0.889551
CFDP1	3699508	ILMN_1800837	6200494	0.000261732	0.00364347	0.0705246	0.0306457	0.0575803	0.0178512	1.2248	1.71673	0.220706	0.0864686	0.397011	0.362164
CFHR2	2373494	ILMN_2045453	3120601	-8.47e-05	0.004855	-0.0242124	0.0393649	0.0325089	0.0198503	-0.744793	1.98309	0.456432	0.0477462	0.639773	0.260926
CFHR4	2373465	ILMN_1665855	5050128	-0.000196537	5.05e-05	0.0072746	0.00782059	0.0521988	0.0387835	0.139363	0.201647	0.889169	0.840251	0.942927	0.952315
CFHR5	2373511	ILMN_1718248	5310292	-0.000134681	0.00100859	-0.0418801	0.035279	0.0684579	0.0391176	-0.611764	0.901872	0.540722	0.367434	0.714386	0.723226
CFI	2781736	ILMN_1727815	1690609	-0.000162329	1.05e-06	0.0239709	0.000616221	0.0785644	0.0212067	0.305111	0.0290578	0.760294	0.976827	0.869343	0.992564
CFL2	3560673	ILMN_2291891	5810300	4.11e-05	0.00241688	-0.0328114	-0.0425042	0.0374947	0.0304205	-0.875092	-1.39723	0.381565	0.162787	0.572406	0.495869
CFTR	3020646	ILMN_1705813	5870131	0.000401731	0.00618445	0.220615	0.0641986	0.113974	0.0286612	1.93566	2.23991	0.052965	0.0254083	0.135967	0.177593
CGA	2963614	ILMN_1734176	2350730	-0.000180753	0.000284345	0.0124883	-0.0119098	0.0502198	0.0248814	0.248672	-0.478664	0.803625	0.632327	0.897135	0.872147
CGN	2358949	ILMN_1746801	1980670	-5.47e-06	0.00328358	-0.104665	0.0666545	0.0936277	0.0409073	-1.11788	1.6294	0.26367	0.103675	0.4467	0.39572
CH25H	3299578	ILMN_1741021	1770593	7.04e-05	1.1e-05	0.0627191	0.00290879	0.0471608	0.0308881	1.3299	0.0941717	0.183611	0.925	0.34788	0.977662
CHAC1	3590275	ILMN_1739241	1500082	-0.000189534	0.00273808	-0.00613352	0.0601291	0.0437204	0.0404243	-0.14029	1.48745	0.888437	0.137345	0.942767	0.458451
CHAC2	2482211	ILMN_2148150	2850082	0.00140965	0.000202048	0.142885	-0.0157554	0.0488722	0.0390494	2.92364	-0.403473	0.00347502	0.686723	0.0142622	0.892473
CHAD	3762380	ILMN_1700652	4890167	0.000572692	0.000352833	-0.0852547	-0.0198343	0.0516964	0.0371971	-1.64914	-0.533223	0.0991808	0.594048	0.220087	0.855289
CHAF1A	3817501	ILMN_1669842	2120097	0.00176881	2.38e-05	-0.218747	-0.00493592	0.0724135	0.0356469	-3.0208	-0.138467	0.00253368	0.889911	0.010869	0.966162
CHAF1B	3920003	ILMN_1674231	4610731	0.000247593	0.000575773	0.0810014	0.0211979	0.0591151	0.0311163	1.37023	0.681249	0.170676	0.495939	0.331183	0.805244
CHCHD1	3251916	ILMN_1672149	7570619	-0.000106005	0.0102449	-0.036613	0.0636831	0.0382195	0.0220379	-0.957966	2.88972	0.338126	0.00397465	0.527544	0.0510603
CHCHD10	3954887	ILMN_1740170	940010	-0.000218115	0.00942397	0.0273098	-0.0456789	0.0381803	0.0164894	0.715284	-2.7702	0.474466	0.00575009	0.655957	0.066304
CHCHD2	3051928	ILMN_1815124	3140019	-0.000143139	0.00250562	-0.0137273	0.0207814	0.036437	0.0146068	-0.37674	1.42272	0.706382	0.155262	0.83519	0.483814
CHCHD3	3073597	ILMN_1673026	6620626	0.00136372	0.00138235	0.0797075	-0.0251383	0.0300737	0.0238038	2.65041	-1.05606	0.0080646	0.291302	0.0291827	0.656233
CHCHD5	2500875	ILMN_1797530	6900392	0.000802114	0.00126491	-0.093149	-0.020125	0.0462649	0.019923	-2.01338	-1.01014	0.0441274	0.312776	0.117745	0.675477
CHCHD7	3099089	ILMN_1744138	5220504	0.000398209	0.000640753	-0.0840006	-0.0150279	0.0457995	0.0209101	-1.8341	-0.718689	0.0666986	0.472571	0.163229	0.793945
CHD1	2868523	ILMN_1654583	2350176	0.0105909	0.00353492	-0.378414	0.028134	0.0535386	0.0166389	-7.06806	1.69086	1.79e-12	0.0913068	4.36e-11	0.372208
CHD4	3442054	ILMN_1658411	430224	0.00153254	0.000881569	0.140621	-0.0140499	0.0597405	0.0166643	2.35387	-0.84311	0.0186174	0.399454	0.0585897	0.747406
CHD5	2394478	ILMN_1698148	1500563	-0.000183758	2.24e-05	-0.0486309	0.00352146	0.141063	0.0262357	-0.344746	0.134224	0.730299	0.893264	0.850006	0.966239
CHD6	3906160	ILMN_2209163	4250082	0.00651007	0.00343582	0.359274	-0.0401748	0.0639702	0.0241016	5.61626	-1.6669	2.06e-08	0.0959806	2.66e-07	0.380825
CHD9	3660858	ILMN_1762972	1710474	0.00491474	0.00604915	-0.273261	0.031246	0.0568613	0.0141059	-4.80576	2.2151	1.59e-06	0.0270728	1.45e-05	0.185357
CHDC2	3973556	ILMN_1714718	1990347	-0.000208512	0.000931702	-0.0128965	-0.0201606	0.0722131	0.0232593	-0.17859	-0.866776	0.858267	0.386361	0.92524	0.737586
CHDH	2676854	ILMN_2135321	3520437	0.00058078	0.000488321	-0.107331	-0.0162298	0.0674387	0.0258703	-1.59153	-0.627351	0.111553	0.530633	0.241071	0.822713
CHEK2	3956433	ILMN_1759585	6510079	0.00388187	0.00565951	0.262163	0.0828217	0.0587108	0.0386639	4.46532	2.14209	8.17e-06	0.0325288	6.43e-05	0.207393
CHFR	3479438	ILMN_1653828	830168	-0.000239978	0.010174	-0.0264555	-0.0624456	0.0974514	0.0216857	-0.271473	-2.87958	0.786038	0.00410316	0.886213	0.0523237
CHGA	3549092	ILMN_1669410	6200348	-7.25e-05	0.00026215	-0.0469038	0.0111436	0.0871641	0.0242465	-0.53811	0.459597	0.590525	0.645948	0.754055	0.875745
CHGB	3875179	ILMN_1765966	6420356	-0.000171737	4.9e-05	0.0294584	0.00710682	0.0576888	0.0357588	0.510644	0.198744	0.609623	0.842521	0.767683	0.952468
CHI3L2	2351687	ILMN_1685045	4830202	0.000243337	0.000665175	0.0591206	0.0249673	0.0439022	0.0340958	1.34664	0.732268	0.178156	0.464249	0.340716	0.788251
CHIA	2351763	ILMN_1679647	2350204	0.000428039	6.5e-05	0.134225	0.00621677	0.0794906	0.0271706	1.68856	0.228805	0.0913651	0.819087	0.207023	0.945765
CHIC2	2769539	ILMN_1679428	3130576	0.00686296	0.00116204	-0.331531	-0.0183156	0.0572281	0.0189184	-5.79315	-0.968137	7.33e-09	0.333309	1.02e-07	0.694086
CHKA	3379326	ILMN_1691151	6330170	-0.00019893	1.71e-05	-0.00152833	-0.00311738	0.0681229	0.0265937	-0.0224349	-0.117223	0.982102	0.906717	0.992729	0.970943
CHML	2463515	ILMN_1747697	1780240	0.00258494	1.36e-05	-0.165414	-0.00266297	0.0421535	0.0254236	-3.9241	-0.104744	8.82e-05	0.916609	0.000557695	0.975891
CHMP1A	3704896	ILMN_1709439	5900332	0.00515161	0.00320944	-0.409957	-0.0294141	0.0768612	0.0182602	-5.33373	-1.61083	1e-07	0.107665	1.15e-06	0.404162
CHMP1B	3779314	ILMN_1763265	3940148	0.0051293	0.00262359	-0.241977	-0.0233013	0.0469848	0.0160045	-5.15012	-1.45592	2.7e-07	0.145861	2.88e-06	0.470581
CHMP2A	3872983	ILMN_1656621	3290181	0.00688648	0.0159112	-0.451695	-0.0498603	0.077236	0.0137998	-5.84824	-3.61313	5.28e-09	0.000324088	7.55e-08	0.00761259
CHMP2B	2631845	ILMN_1741176	6250121	0.000546742	0.000726063	-0.117241	-0.0124775	0.0546508	0.0163088	-2.14527	-0.765076	0.0319786	0.444483	0.0908184	0.775561
CHMP4B	3882681	ILMN_1771233	4180315	0.00293665	0.00662776	0.160149	-0.0492949	0.0434358	0.0212533	3.68703	-2.3194	0.000229271	0.0206592	0.00131872	0.155882
CHMP4C	3105033	ILMN_1711542	2490554	-0.000145647	1.13e-05	0.0264314	-0.00286522	0.056066	0.0300781	0.471433	-0.0952593	0.637352	0.924136	0.78851	0.977662
CHMP5	3166844	ILMN_1732534	7650347	0.000607664	0.0319711	-0.0844753	0.0655659	0.0385339	0.0126811	-2.19223	5.17034	0.0284081	3.05e-07	0.0825061	3.12e-05
CHMP6	3737647	ILMN_1706397	5690520	0.00162418	0.000238173	-0.200558	-0.0131571	0.0775287	0.0300344	-2.58688	-0.438068	0.0097126	0.661471	0.0340917	0.883332
CHMP7	3089853	ILMN_1795933	3440692	0.000453943	0.000958445	0.0908611	-0.018083	0.0589851	0.0205689	1.54041	-0.879141	0.123524	0.379625	0.260084	0.731596
CHN1	2587961	ILMN_1679638	6480477	-0.00019806	0.00315541	8.46e-05	-0.0591935	0.0417401	0.0370615	0.00202664	-1.59717	0.998383	0.110678	0.999296	0.409046
CHN2	2994835	ILMN_2403237	3190246	0.00369259	0.00689538	0.234824	-0.0403769	0.0555226	0.0170645	4.22934	-2.36613	2.39e-05	0.0182455	0.000169275	0.14323
CHODL	3915569	ILMN_1726575	5690241	-0.000187555	0.0130789	0.0609008	0.0954439	0.0738809	0.0291841	0.82431	3.2704	0.409802	0.00112633	0.598342	0.0202874
CHORDC1	3386217	ILMN_1776337	380528	0.000419797	0.00286919	-0.022249	0.0321437	0.0154882	0.0211089	-1.43651	1.52276	0.150918	0.128269	0.302435	0.441359
CHP1	3590341	ILMN_1779401	6760192	0.0130247	0.000477941	0.369348	-0.00992577	0.0470442	0.0159927	7.8511	-0.620644	5e-15	0.535035	1.74e-13	0.825153
[truncated: 10,051 more rows]
