# Supplementary material for: Peripheral Blood Transcriptomic Signatures of Fasting Glucose and Insulin Concentrations
Source: Oxford University Press journal article supplement (doi:10.2337/db16-0470), 2016-09-13
Supplement: db160470supplementarydata4.xlsx [file db160470supplementarydata4.xlsx]

## Sheet: DB160470SupplementaryData4
Gene	probeid_FHS	probeid_ILMN	probeid2_ILMN	rsq_FHS	beta_FHS	beta_ILMN	se_FHS	se_ILMN	tstat_FHS	zstat_ILMN	pval_FHS	pval_ILMN	FDR_FHS	FDR_ILMN
A1CF	3289445	ILMN_1779670	5340672	0.000284055	1.20027	0.525448	0.891503	0.579828	1.34634	0.906214	0.178254	0.364823	0.622309	0.999878
A2M	3443348	ILMN_1745607	2370438	-0.000154793	0.0951643	0.211942	0.274712	0.580465	0.346415	0.365124	0.729045	0.715019	0.936945	0.999878
A4GNT	2697308	ILMN_1680754	2260458	-0.000108681	-0.398772	-0.424144	0.513107	0.410791	-0.77717	-1.03251	0.437095	0.301835	0.82374	0.999878
AAAS	3456130	ILMN_1755321	60689	-0.00015931	-0.201276	-1.14375	0.674768	0.491497	-0.298289	-2.32706	0.765495	0.0199619	0.944376	0.999878
AACS	3436571	ILMN_1698554	1580504	-5e-05	0.841581	0.216624	0.824184	0.515153	1.02111	0.420505	0.307252	0.674117	0.735498	0.999878
AADAC	2648074	ILMN_1760414	6200619	-0.000182128	-0.1376	-0.137293	0.657928	0.478061	-0.209142	-0.287187	0.834346	0.773969	0.964308	0.999878
AADACL2	2648041	ILMN_1752884	1780408	9.67e-05	0.690709	-0.321653	0.592011	0.467499	1.16672	-0.688029	0.24338	0.491434	0.691593	0.999878
AADAT	2793441	ILMN_2357031	4220717	-0.0001252	-0.746194	-0.172244	0.995053	0.551313	-0.749904	-0.312425	0.453348	0.754717	0.832289	0.999878
AAK1	2558150	ILMN_1880387	4900291	0.000631569	1.10963	0.0805153	0.564557	0.502097	1.96548	0.160358	0.0494133	0.872599	0.381675	0.999878
AAMDC	3341440	ILMN_1779163	3310228	0.000535319	-0.736783	-0.246225	0.443428	0.392239	-1.66156	-0.627742	0.0966629	0.530173	0.492958	0.999878
AAMP	2599345	ILMN_1653165	4610048	0.000223104	-1.33034	0.417689	0.924341	0.419853	-1.43923	0.994847	0.150147	0.319811	0.581013	0.999878
AANAT	3735505	ILMN_1729835	1070703	-0.000105643	-0.291932	-0.161083	0.475944	0.562631	-0.613376	-0.286304	0.539656	0.774645	0.870292	0.999878
AARS	3697015	ILMN_1662364	290603	-0.000198629	-0.398863	-0.0331172	0.703375	0.26439	-0.567071	-0.125259	0.570692	0.900319	0.880924	0.999878
AARS2	2955118	ILMN_1674698	4560681	0.000565194	-2.08113	0.10664	1.09838	0.394121	-1.89472	0.270576	0.0581864	0.786717	0.410267	0.999878
AASDH	2770193	ILMN_1784269	4150561	-8.36e-05	0.283559	-0.385445	0.319022	0.410461	0.888838	-0.939053	0.374133	0.347703	0.782283	0.999878
AASDHPPT	3347234	ILMN_1698189	6060767	-0.000158668	-0.225879	-0.535892	0.667101	0.403126	-0.338598	-1.32934	0.734926	0.183736	0.938309	0.999878
AASS	3070183	ILMN_2157219	1500465	-0.000199085	-0.571777	0.238756	0.568062	0.538671	-1.00654	0.443232	0.314204	0.657598	0.741396	0.999878
AATF	3719362	ILMN_1703743	6020372	-6.74e-05	-0.546488	-0.0678116	0.749815	0.260571	-0.72883	-0.260242	0.466139	0.794677	0.835568	0.999878
AATK-AS1	3737783	ILMN_1671997	2120274	0.000208247	1.60178	-0.0924425	0.957065	0.430228	1.67364	-0.214869	0.0942638	0.82987	0.48834	0.999878
ABAT	3647421	ILMN_1670117	1110025	-8.71e-05	0.331161	0.215405	0.290565	0.45906	1.13971	0.469232	0.254461	0.638904	0.698802	0.999878
ABCA1	3218528	ILMN_1766054	4060358	0.00408543	-1.59877	-0.117868	0.35146	0.146391	-4.54892	-0.805156	5.52e-06	0.42073	0.00201515	0.999878
ABCA10	3768880	ILMN_2070570	7550128	-0.000197389	-0.216613	-0.210426	0.75374	0.492345	-0.287385	-0.427396	0.77383	0.669091	0.946917	0.999878
ABCA11P	2756309	ILMN_2232084	2320403	0.000345087	-0.563877	-0.82903	0.33829	0.46142	-1.66684	-1.79669	0.0956076	0.0723846	0.49057	0.999878
ABCA12	2598145	ILMN_2361400	4900711	-0.000102765	-0.490267	0.0477605	1.35644	0.590837	-0.361435	0.0808353	0.717789	0.935573	0.932859	0.999878
ABCA3	3676763	ILMN_1758523	430402	-0.000169035	0.546585	0.492696	1.3474	0.403361	0.40566	1.22148	0.68501	0.221906	0.923108	0.999878
ABCA4	2423669	ILMN_1794965	6650504	4.84e-05	1.79948	0.0202943	1.36243	0.517543	1.32079	0.0392128	0.186632	0.968721	0.636007	0.999878
ABCA6	3768791	ILMN_1795507	6940519	0.000195682	-0.583862	0.861979	0.390342	0.470444	-1.49577	1.83227	0.134776	0.0669118	0.558094	0.999878
ABCA7	3815416	ILMN_1743205	2570100	0.000570753	-2.15766	-0.0531177	1.08466	0.20717	-1.98925	-0.256397	0.0467278	0.797645	0.371663	0.999878
ABCA8	3768627	ILMN_1796801	2710392	-0.000195811	0.0965707	0.296735	1.22798	0.459811	0.0786419	0.645342	0.937321	0.518706	0.988981	0.999878
ABCA9	3768703	ILMN_1720501	4730370	-0.000172366	-0.191193	-0.0916738	0.617365	0.456721	-0.309692	-0.200722	0.756808	0.840916	0.942155	0.999878
ABCB1	3060182	ILMN_1812070	1230048	0.00136915	1.64746	0.276435	0.573347	0.394531	2.87341	0.700668	0.00407769	0.48351	0.114804	0.999878
ABCB10	2459924	ILMN_1665730	4810048	0.000372195	0.732501	-0.0573684	0.430023	0.299292	1.7034	-0.19168	0.0885549	0.847992	0.478678	0.999878
ABCB11	2585972	ILMN_2232066	7330332	-0.00014593	-0.38662	0.431614	1.0617	0.429802	-0.364153	1.00422	0.715759	0.315274	0.932827	0.999878
ABCB7	4012949	ILMN_1687840	5700286	0.000372692	-1.19507	-0.200034	0.637975	0.395198	-1.87322	-0.506161	0.0610954	0.612744	0.416732	0.999878
ABCB8	3031754	ILMN_2102422	3990592	-0.000160438	-0.573005	-0.120477	1.07729	0.482156	-0.531893	-0.249871	0.594824	0.802687	0.891385	0.999878
ABCC1	3649890	ILMN_1802404	1500187	-3.24e-05	0.731202	-0.549561	0.883018	0.53428	0.828071	-1.0286	0.407669	0.303667	0.805245	0.999878
ABCC10	2907943	ILMN_1776119	650646	-0.000177611	-0.181442	-0.32441	1.15281	0.488522	-0.157391	-0.664064	0.874943	0.506649	0.972981	0.999878
ABCC12	3690388	ILMN_1762093	6290348	-0.000174454	0.334642	0.150422	1.23766	0.630717	0.270382	0.238493	0.786877	0.811498	0.948832	0.999878
ABCC13	3914786	ILMN_1774344	4780553	0.000604583	0.765336	-0.0588507	0.417414	0.535548	1.83352	-0.109889	0.0667844	0.912498	0.429737	0.999878
ABCC2	3260447	ILMN_1676278	2230746	-4.57e-05	0.668837	0.094102	0.932709	0.576059	0.717091	0.163355	0.473351	0.870239	0.838315	0.999878
ABCC6	3682182	ILMN_1778352	3370332	-0.000179556	0.230301	0.687976	1.17627	0.530955	0.195789	1.29573	0.844784	0.195067	0.9658	0.999878
ABCC8	3364878	ILMN_1767129	4850086	0.000456107	2.3035	0.258973	1.39555	0.628329	1.6506	0.412162	0.098882	0.680221	0.495978	0.999878
ABCD1	3995848	ILMN_1772189	4890609	5.14e-05	-1.14418	-0.697219	0.814462	0.434696	-1.40483	-1.60392	0.160135	0.108731	0.597425	0.999878
ABCD2	3450861	ILMN_1652959	2940709	0.000432816	-0.846891	-0.620597	0.44384	0.478729	-1.9081	-1.29634	0.0564349	0.194857	0.403585	0.999878
ABCD4	3571810	ILMN_1746032	6420427	-0.000136234	-0.545045	0.544125	0.985463	0.464699	-0.553085	1.17092	0.580229	0.241631	0.884698	0.999878
ABCE1	2746024	ILMN_1676846	5310152	0.000339582	-0.719003	-0.123265	0.438479	0.30032	-1.63977	-0.410446	0.101116	0.681479	0.501832	0.999878
ABCF3	2655511	ILMN_1810085	4560689	-0.000151232	0.356982	-0.620013	0.737399	0.45952	0.48411	-1.34926	0.628329	0.177252	0.905449	0.999878
ABCG5	2550755	ILMN_1716592	6290575	0.000239645	-1.25777	0.162591	0.84758	0.495414	-1.48395	0.328192	0.137885	0.742767	0.560373	0.999878
ABCG8	2479560	ILMN_1680309	2690367	-0.000203259	0.099325	0.0182104	0.813151	0.461722	0.122148	0.0394402	0.902786	0.968539	0.979921	0.999878
ABHD10	2635983	ILMN_1770031	1300328	0.00101466	-1.41176	0.100949	0.575671	0.35515	-2.45237	0.284242	0.0142256	0.776225	0.214382	0.999878
ABHD11	3056264	ILMN_1737475	6110592	-7.86e-05	-0.40926	-0.138896	0.79431	0.564506	-0.51524	-0.246049	0.606408	0.805644	0.895125	0.999878
ABHD12	3901851	ILMN_2245305	7610382	0.00063767	-1.38922	0.0708642	0.677928	0.426307	-2.04922	0.166228	0.0404927	0.867977	0.34532	0.999878
ABHD12B	3535307	ILMN_1698311	3120274	7.19e-05	0.479622	0.577339	0.387236	0.456884	1.23858	1.26365	0.215559	0.206357	0.66349	0.999878
ABHD15	3751524	ILMN_1769390	5340450	-0.000174387	0.339577	-0.689157	0.663151	0.377895	0.512065	-1.82367	0.608628	0.0682013	0.895802	0.999878
ABHD16B	3893732	ILMN_1805483	5550400	4.76e-05	-0.709954	0.658816	0.589797	0.46557	-1.20373	1.41507	0.228752	0.157047	0.677264	0.999878
ABHD17A	3845581	ILMN_2140623	4150463	-0.000112445	-0.301166	0.670958	0.567401	0.55871	-0.530781	1.20091	0.595594	0.229788	0.891985	0.999878
ABHD17B	3209497	ILMN_1785661	6180470	0.000251241	0.907623	-0.210405	0.67101	0.311836	1.35262	-0.674728	0.176237	0.499849	0.619323	0.999878
ABHD2	3607503	ILMN_1787618	6520291	0.000132694	0.882614	0.905845	0.609572	0.596958	1.44792	1.51743	0.147701	0.129157	0.574497	0.999878
ABHD3	3800834	ILMN_1801767	5050241	6.32e-06	-0.667442	-0.395987	0.575413	0.218974	-1.15994	-1.80837	0.24613	0.0705485	0.693341	0.999878
ABHD4	3528759	ILMN_1700633	3120014	-4.79e-05	0.377984	-0.0063199	0.748142	0.413893	0.50523	-0.0152694	0.613419	0.987817	0.898124	0.999878
ABHD5	2619761	ILMN_1655702	5860215	0.00153699	1.17582	-0.251602	0.446057	0.234385	2.63604	-1.07346	0.00841367	0.283066	0.165391	0.999878
ABHD8	3854349	ILMN_1712707	4880288	-0.000205458	-0.164576	0.0748368	0.923143	0.371896	-0.178278	0.20123	0.858511	0.840518	0.968892	0.999878
ABI1	3282016	ILMN_1739081	3520706	-0.000195794	0.115057	-0.31622	0.893046	0.436513	0.128837	-0.724423	0.897492	0.468806	0.978165	0.999878
ABI2	2523689	ILMN_1724497	2000100	0.000711764	1.302	-0.573697	0.63507	0.378822	2.05018	-1.51443	0.040399	0.129918	0.345165	0.999878
ABI3	3725602	ILMN_1755658	3840717	0.00021885	1.21025	0.242974	0.790032	0.240565	1.5319	1.01001	0.125609	0.312489	0.544448	0.999878
ABI3BP	2686458	ILMN_1673639	6980739	-6.96e-05	-0.790187	0.588337	1.14533	0.534155	-0.689923	1.10143	0.490274	0.270707	0.844938	0.999878
ABL1	3191724	ILMN_1708922	4590440	-4.03e-05	0.688693	0.454961	0.736298	0.631107	0.935345	0.720893	0.349655	0.470975	0.765744	0.999878
ABLIM3	2834863	ILMN_1656940	2350747	-0.000173675	0.194102	0.660974	0.757783	0.496511	0.256145	1.33124	0.79785	0.183111	0.952423	0.999878
ABO	3228582	ILMN_1656979	1240575	-2.96e-05	-0.524364	0.940698	0.657586	0.598167	-0.797407	1.57263	0.425252	0.115804	0.817052	0.999878
ABRA	3148387	ILMN_1766991	3610382	-1.97e-05	0.421068	-0.0546685	0.365813	0.629162	1.15105	-0.0868911	0.249768	0.930758	0.695885	0.999878
ABRACL	2927967	ILMN_1720858	6020681	6.91e-05	0.515225	0.297781	0.366004	0.260869	1.4077	1.1415	0.159281	0.253664	0.596807	0.999878
ABT1	2899519	ILMN_1658083	6480392	0.000398062	-1.0796	-0.327261	0.663784	0.380569	-1.62643	-0.859925	0.103921	0.38983	0.509046	0.999878
ABTB1	2640916	ILMN_2367165	6620609	0.000770596	-1.15833	0.0832642	0.539141	0.140588	-2.14848	0.592255	0.0317231	0.55368	0.311797	0.999878
ABTB2	3368940	ILMN_1753370	940148	-0.000216709	0.260762	-0.55223	1.0226	0.451308	0.254998	-1.22362	0.798735	0.221095	0.952569	0.999878
ACAA1	2669533	ILMN_1738921	3520753	0.00110215	-1.88781	0.065509	0.76897	0.247514	-2.45499	0.264668	0.0141225	0.791265	0.214382	0.999878
ACAA2	3807569	ILMN_1660199	1450093	0.0024525	1.43529	0.00664634	0.410303	0.344403	3.49812	0.0192982	0.000472596	0.984603	0.0383632	0.999878
ACACB	3430959	ILMN_1763852	2230678	-0.000189373	-0.270338	-0.706727	1.07792	0.322214	-0.250797	-2.19335	0.801982	0.0282823	0.953218	0.999878
ACADL	2597347	ILMN_1660890	130193	-0.000196456	-0.0367941	-0.128561	0.7428	0.462619	-0.0495343	-0.277898	0.960495	0.78109	0.992947	0.999878
ACADSB	3268588	ILMN_1740920	3610136	-6.65e-05	-0.370002	-0.356939	0.484227	0.504516	-0.764109	-0.707489	0.444838	0.479263	0.826723	0.999878
ACAN	3607332	ILMN_1777182	4480747	0.000136683	-1.62974	-0.55382	1.26237	0.539888	-1.29102	-1.02581	0.196757	0.304983	0.646428	0.999878
ACAP1	3708462	ILMN_1808395	7210682	-0.000198145	-0.000659872	-0.0967692	0.681776	0.193886	-0.000967872	-0.499104	0.999228	0.617706	0.99956	0.999878
ACAP2	2712040	ILMN_1766798	3060747	0.00192908	-2.74903	-0.161473	0.841424	0.282607	-3.26712	-0.571371	0.00109375	0.567748	0.056283	0.999878
ACAP3	2391302	ILMN_1743847	4850215	-0.000247869	0.383885	-0.672063	1.22475	0.529516	0.313439	-1.2692	0.75396	0.204369	0.941545	0.999878
ACAT1	3347615	ILMN_1800008	2070605	-4.13e-05	0.90248	-0.0265593	0.606673	0.28932	1.48759	-0.091799	0.136922	0.926858	0.559913	0.999878
ACAT2	2934131	ILMN_2133799	7210440	-0.000222569	0.150697	-0.0803375	0.543141	0.464987	0.277455	-0.172773	0.781442	0.86283	0.948334	0.999878
ACBD3	2458701	ILMN_1665945	5890112	-0.000182823	-0.153242	-0.323554	0.771307	0.370793	-0.198678	-0.872602	0.842522	0.38288	0.96561	0.999878
ACBD6	2446447	ILMN_1684271	870349	-0.000249771	0.209164	-0.298214	0.517929	0.438131	0.403847	-0.680651	0.686342	0.496093	0.923192	0.999878
ACBD7	3279058	ILMN_1726388	630678	8.02e-05	-0.293992	0.153614	0.297746	0.566101	-0.987391	0.271355	0.323499	0.786118	0.748982	0.999878
ACD	3695786	ILMN_1716480	1300154	-0.000143546	0.348275	-0.522818	0.96125	0.347108	0.362315	-1.50621	0.717132	0.132013	0.932844	0.999878
ACE2	4000605	ILMN_1667018	7100468	0.000136573	-1.56902	0.137024	1.00587	0.500386	-1.55987	0.273837	0.118853	0.78421	0.534994	0.999878
ACER1	3847754	ILMN_1773243	650131	3.09e-05	-0.869144	-0.390171	0.625841	0.615991	-1.38876	-0.633403	0.164967	0.52647	0.60366	0.999878
ACER3	3341061	ILMN_1812552	1230017	0.000130061	-0.65889	0.342889	0.534851	0.299321	-1.23191	1.14556	0.218039	0.251979	0.665158	0.999878
ACIN1	3557106	ILMN_1699636	4860204	-5.43e-05	0.831396	0.0462127	0.816118	0.294723	1.01872	0.1568	0.308385	0.875402	0.736692	0.999878
ACKR4	2642887	ILMN_1773992	5860630	5.4e-06	-0.239559	0.772637	0.241289	0.496896	-0.992832	1.55492	0.320839	0.119964	0.746731	0.999878
ACLY	3757433	ILMN_2371379	4200259	-0.00019654	0.045575	0.174089	0.787374	0.25899	0.0578823	0.672186	0.953845	0.501465	0.991964	0.999878
ACMSD	2507173	ILMN_1727091	20041	-0.000200315	0.0429148	-0.125683	0.649656	0.517581	0.0660577	-0.242827	0.947335	0.80814	0.991845	0.999878
ACN9	3013952	ILMN_2134039	6040088	-3.8e-05	-0.154068	0.125071	0.30106	0.292045	-0.51175	0.428259	0.608848	0.668463	0.895802	0.999878
ACO1	3166477	ILMN_1750800	2450608	-0.000173628	0.120298	0.989399	0.530296	0.45143	0.226851	2.1917	0.820549	0.028401	0.959776	0.999878
ACO2	3946889	ILMN_1654861	3930639	0.00140771	1.89289	0.169734	0.751366	0.326588	2.51927	0.51972	0.0117906	0.603258	0.195428	0.999878
ACOT12	2864796	ILMN_1785474	2070181	-0.000201105	0.0927025	0.0812682	0.83823	0.585633	0.110593	0.13877	0.911943	0.889632	0.981773	0.999878
ACOT13	2898562	ILMN_2098743	1580427	7.58e-05	-0.468392	-0.208333	0.415096	0.399138	-1.12839	-0.521957	0.259207	0.6017	0.701897	0.999878
ACOT4	3543714	ILMN_1764321	4780709	0.000263125	0.537095	0.095484	0.391523	0.393738	1.37181	0.242506	0.170184	0.808388	0.609905	0.999878
ACOT7	2394626	ILMN_2332250	6580639	-0.000202203	0.345871	0.71335	0.99007	0.394748	0.34934	1.8071	0.726848	0.0707463	0.93615	0.999878
ACOT8	3907473	ILMN_1679600	2900291	-6.4e-05	0.438945	-0.721175	0.769714	0.415694	0.57027	-1.73487	0.56852	0.0827636	0.879958	0.999878
ACOX1	3771215	ILMN_1668839	3940408	0.000146858	-0.499898	-0.119295	0.508858	0.545096	-0.982391	-0.218851	0.325954	0.826766	0.751148	0.999878
ACOX2	2678400	ILMN_1685703	1010114	-0.000165222	-0.220005	-0.19957	0.988108	0.520791	-0.222653	-0.383206	0.823815	0.701567	0.960891	0.999878
ACOXL	2500165	ILMN_1743680	1300300	5.72e-05	-0.694433	0.271089	0.730566	0.520483	-0.950541	0.52084	0.341883	0.602478	0.761918	0.999878
ACP1	2466141	ILMN_2344956	6110672	4.8e-05	0.243695	0.134581	0.337668	0.158456	0.721701	0.849325	0.470512	0.3957	0.83747	0.999878
ACP5	3851072	ILMN_2078599	7050082	0.000696935	0.693741	-0.135118	0.335296	0.279634	2.06904	-0.483196	0.0385931	0.628956	0.337725	0.999878
ACP6	2433371	ILMN_2234343	4670671	8.25e-05	0.702786	-0.120777	0.602122	0.506714	1.16718	-0.238353	0.243192	0.811608	0.691593	0.999878
ACPL2	2645387	ILMN_2306955	5720537	-0.000145151	-0.20163	-0.177544	0.510029	0.417318	-0.395331	-0.42544	0.692615	0.670516	0.925472	0.999878
ACPP	2642720	ILMN_1758323	2680725	0.000329923	-0.617149	-0.239635	0.448958	0.328996	-1.37463	-0.728384	0.169309	0.466379	0.60968	0.999878
ACPT	3839499	ILMN_1728331	2690369	0.000165149	1.12391	0.460953	0.935198	0.234104	1.20179	1.96901	0.229503	0.0489516	0.677984	0.999878
ACR	3951117	ILMN_1705637	6900576	-0.000217695	0.192568	-0.516249	0.577467	0.629477	0.33347	-0.820123	0.738793	0.412146	0.938839	0.999878
ACRC	3981164	ILMN_1666690	3850192	0.000787862	1.17805	-0.266662	0.532858	0.519554	2.21082	-0.513251	0.027093	0.607776	0.295127	0.999878
ACRV1	3396660	ILMN_1654468	2570576	-0.000190893	-0.0899998	-0.326806	0.66379	0.503474	-0.135585	-0.649102	0.892155	0.516272	0.976339	0.999878
ACSBG1	3634529	ILMN_2227011	2480730	-1.17e-05	0.666519	0.101914	0.88734	0.428915	0.751143	0.23761	0.452602	0.812184	0.831715	0.999878
ACSBG2	3818268	ILMN_1730002	1660376	-0.000201537	-0.0858512	-0.0162755	0.872919	0.569757	-0.0983495	-0.0285657	0.921659	0.977211	0.98397	0.999878
ACSF3	3673806	ILMN_1716832	5820142	-0.000200241	-0.710342	0.513878	0.891513	0.442701	-0.796782	1.16078	0.425615	0.245732	0.817052	0.999878
ACSL1	2796553	ILMN_1684585	1030431	8.74e-05	0.445539	-0.0617142	0.398551	0.133765	1.1179	-0.461363	0.263665	0.644538	0.704874	0.999878
ACSL3	2529546	ILMN_1654414	3440367	0.000324555	-0.783158	0.0163142	0.664691	0.429101	-1.17823	0.0380195	0.238761	0.969672	0.687418	0.999878
ACSL4	4017810	ILMN_2285506	3990747	-0.000169309	-0.375483	0.0456836	0.590804	0.533135	-0.635545	0.0856886	0.525102	0.931714	0.864455	0.999878
ACSL5	3264326	ILMN_2273911	2320332	-5.17e-05	0.705923	0.329142	0.69306	0.441179	1.01856	0.746052	0.308461	0.455636	0.736692	0.999878
ACSM1	3683740	ILMN_1661434	5870669	-0.000193873	0.176006	0.416406	0.667286	0.594675	0.263765	0.700225	0.791972	0.483787	0.950434	0.999878
ACSM2B	3683651	ILMN_1746128	4760202	-3.46e-05	0.129934	0.319075	0.129837	0.388869	1.00075	0.82052	0.316998	0.41192	0.743308	0.999878
ACSM5	3651294	ILMN_1801698	520364	0.000105898	-0.854589	-0.400399	0.689405	0.455684	-1.2396	-0.878676	0.21518	0.379577	0.66349	0.999878
ACSS3	3424218	ILMN_1659885	2810154	0.000522331	-1.03957	-0.114762	0.696819	0.432323	-1.49188	-0.265455	0.135794	0.790659	0.559224	0.999878
ACTA1	2459837	ILMN_2125869	5080132	-0.000153153	-0.365959	0.469933	0.928048	0.628266	-0.394332	0.747984	0.693352	0.45447	0.925714	0.999878
ACTB	3036924	ILMN_2038777	5570132	-0.000201293	0.0200579	0.0604533	0.0951002	0.148148	0.210913	0.40806	0.832963	0.683229	0.963911	0.999878
ACTC1	3617719	ILMN_1658660	4260201	-0.000159627	0.112542	-0.189772	0.429037	0.579729	0.262312	-0.327346	0.793092	0.743407	0.950434	0.999878
ACTG1	3773932	ILMN_1704961	6510072	-0.00014802	0.531326	0.0810428	0.59349	0.0709583	0.895257	1.14212	0.370693	0.253405	0.780739	0.999878
ACTG2	2489007	ILMN_1795325	4610431	-0.000143593	0.248823	0.646638	0.61783	0.562421	0.402737	1.14974	0.687159	0.25025	0.923533	0.999878
ACTL6A	2654023	ILMN_2328280	5220358	-0.000197043	-0.0225347	-0.608355	0.76639	0.437085	-0.0294037	-1.39185	0.976544	0.163969	0.9974	0.999878
ACTL6B	3064204	ILMN_1657855	4810100	-0.000194486	0.150472	0.565377	0.952091	0.526281	0.158044	1.07429	0.874429	0.282694	0.972981	0.999878
ACTL7A	3184204	ILMN_1717900	6960669	-0.000194792	0.0892985	-0.283861	0.281855	0.59895	0.316824	-0.47393	0.75139	0.63555	0.94119	0.999878
ACTL7B	3219543	ILMN_1796088	7550092	-0.000106392	0.387308	0.590227	0.556773	0.438768	0.695631	1.34519	0.486692	0.178563	0.842888	0.999878
ACTL8	2323087	ILMN_1704078	1450100	0.000138279	-0.411674	0.60865	0.482538	0.513349	-0.853142	1.18565	0.393621	0.235762	0.797701	0.999878
ACTL9	3849190	ILMN_1656193	4590184	-0.000197112	0.0510712	-0.305942	0.508155	0.59343	0.100503	-0.515549	0.919949	0.606169	0.983532	0.999878
ACTN2	2386943	ILMN_1654422	670196	-6.5e-05	-0.760933	0.0507602	1.01942	0.5186	-0.746434	0.0978791	0.45544	0.922028	0.832714	0.999878
ACTN3	3336324	ILMN_1665691	830348	0.000102016	-1.20532	0.161907	1.0365	0.554297	-1.16288	0.292093	0.244934	0.770215	0.692581	0.999878
ACTN4	3832643	ILMN_1725534	270437	-0.000197464	-0.0320982	0.171293	0.606648	0.240023	-0.0529108	0.713652	0.957805	0.475442	0.992809	0.999878
ACTR10	3537813	ILMN_1798254	2630064	4.88e-06	-0.651316	-0.0338224	0.607923	0.294568	-1.07138	-0.11482	0.284051	0.908587	0.720056	0.999878
ACTR1A	3304406	ILMN_1792314	4280561	0.00073395	1.26768	0.432747	0.627134	0.274854	2.02138	1.57446	0.043293	0.115381	0.357973	0.999878
ACTR1B	2566021	ILMN_1695821	2120088	0.000928622	-1.38103	-0.415662	0.621283	0.361689	-2.22287	-1.14923	0.0262688	0.250463	0.291473	0.999878
ACTR2	2485784	ILMN_2388605	5570196	0.000189449	-0.768852	0.0794357	0.602548	0.130126	-1.276	0.610452	0.202014	0.541563	0.651604	0.999878
ACTR3	2501697	ILMN_1657153	6940176	-1.01e-05	-0.716865	-0.4475	0.778616	0.174032	-0.920691	-2.57137	0.357256	0.0101297	0.770136	0.999878
ACTR3C	3078948	ILMN_1694898	2320300	-0.000204042	0.0646474	-0.537199	0.471461	0.454811	0.137121	-1.18115	0.89094	0.237544	0.976093	0.999878
ACTR6	3428088	ILMN_1697585	1580168	2.47e-05	-0.371003	-0.116572	0.470029	0.259392	-0.789319	-0.449406	0.429963	0.653139	0.819398	0.999878
ACTR8	2676901	ILMN_1689162	270278	0.000156878	1.00802	-0.601146	0.602292	0.462968	1.67364	-1.29846	0.0942637	0.194129	0.48834	0.999878
ACTRT1	4020991	ILMN_1815392	2710368	-0.000160695	0.220366	0.271138	0.528552	0.164741	0.416923	1.64584	0.676752	0.0997964	0.921045	0.999878
ACTRT2	2316905	ILMN_1776442	2600754	-0.000105701	0.918964	0.96748	0.621545	0.475788	1.47852	2.03343	0.139332	0.0420093	0.562464	0.999878
ACTRT3	2704733	ILMN_1782810	2480615	-0.000107855	0.424048	0.721801	0.412749	0.55586	1.02738	1.29853	0.304293	0.194105	0.732769	0.999878
ACVR1	2582562	ILMN_1760490	6940360	0.000337619	0.983022	-0.560076	0.646155	0.308462	1.52134	-1.81571	0.128237	0.0694154	0.549234	0.999878
ACVR2A	2509557	ILMN_1670912	4260681	-0.000222982	-0.186482	-0.12105	0.504983	0.470679	-0.369284	-0.257181	0.711932	0.797039	0.931261	0.999878
ACVR2B	2617752	ILMN_1668983	610564	-0.000106914	-0.456915	0.727307	0.742648	0.529921	-0.615251	1.37248	0.538417	0.169913	0.869703	0.999878
ACY3	3379063	ILMN_1670193	1170228	-0.000211111	-0.165779	0.611632	0.869843	0.558435	-0.190585	1.09526	0.848859	0.273402	0.96645	0.999878
ACYP1	3572263	ILMN_1694233	5910148	-0.000173121	-0.150661	-0.637119	0.482655	0.368789	-0.312151	-1.7276	0.754938	0.0840605	0.941624	0.999878
ACYP2	2482316	ILMN_1697550	130367	-5.33e-05	-0.503121	0.138631	0.485085	0.444941	-1.03718	0.311572	0.299701	0.755365	0.730021	0.999878
ADA	3907011	ILMN_1803686	7210192	0.00101346	1.87241	0.217212	0.730447	0.213431	2.56337	1.01771	0.0103948	0.308814	0.183937	0.999878
ADAD1	2742009	ILMN_1745580	3140326	6.9e-06	0.214288	0.0203465	0.220122	0.457121	0.973499	0.0445101	0.330352	0.964498	0.754501	0.999878
ADAD2	3671651	ILMN_1745108	3400424	0.000495654	-2.04565	0.111693	1.17222	0.586103	-1.74511	0.190569	0.081027	0.848863	0.459715	0.999878
ADAM10	3626555	ILMN_1718946	5290300	0.000311671	-1.30349	-0.609869	0.818831	0.326349	-1.59189	-1.86876	0.111472	0.0616556	0.523477	0.999878
ADAM11	3723128	ILMN_1711374	1260661	0.000379373	2.24313	-0.879577	1.40656	0.458881	1.59476	-1.91678	0.110828	0.0552653	0.522516	0.999878
ADAM12	3311832	ILMN_1726266	520689	-0.00015503	-0.27806	0.318003	0.829205	0.482671	-0.335334	0.65884	0.737387	0.509999	0.938799	0.999878
ADAM17	2539821	ILMN_1765779	5420762	0.000667001	1.52549	0.732921	0.622209	0.516684	2.45174	1.41851	0.0142506	0.156042	0.214382	0.999878
ADAM18	3095152	ILMN_2201386	6560010	0.0001928	-1.0998	-0.846135	0.832293	0.583574	-1.3214	-1.44992	0.186427	0.147081	0.635897	0.999878
ADAM2	3132393	ILMN_1662675	6110315	-0.000182801	-0.562928	1.05763	1.00651	0.462376	-0.559287	2.28738	0.575991	0.0221737	0.883553	0.999878
ADAM23	2524653	ILMN_2060086	110731	-0.000204089	0.0268005	-0.3288	0.41931	0.475637	0.0639157	-0.691284	0.94904	0.489387	0.991925	0.999878
ADAM30	2431211	ILMN_2100871	830601	-0.000180648	0.0661284	-0.782341	0.662519	0.517024	0.0998135	-1.51316	0.920496	0.130239	0.983624	0.999878
ADAM32	3095057	ILMN_2293012	6450164	0.00026236	1.19304	0.0485047	0.674548	0.511079	1.76865	0.0949064	0.0770128	0.924389	0.453473	0.999878
ADAM5	3095114	ILMN_2302214	540195	-8.2e-05	0.569035	0.203138	0.773235	0.559708	0.735914	0.362936	0.461817	0.716653	0.835503	0.999878
ADAM7	3090326	ILMN_1750294	1260424	2.16e-05	-0.937396	0.524722	0.92327	0.604345	-1.0153	0.868249	0.310012	0.385258	0.738459	0.999878
ADAM9	3095002	ILMN_1727524	2940730	0.000929972	-0.893298	0.69815	0.374867	0.537542	-2.38297	1.29878	0.0172103	0.194018	0.233852	0.999878
ADAMDEC1	3090294	ILMN_1716909	1690192	-2.23e-05	-0.619639	0.441822	0.759563	0.510917	-0.815783	0.864764	0.414663	0.387168	0.809195	0.999878
ADAMTS10	3849117	ILMN_1751168	840370	-0.000189785	0.112816	0.324668	1.29788	0.558349	0.0869233	0.581479	0.930736	0.560918	0.986886	0.999878
ADAMTS12	2852591	ILMN_1660970	4060682	8.85e-05	-1.30503	-0.432832	1.11754	0.569706	-1.16776	-0.759746	0.242957	0.447407	0.691593	0.999878
ADAMTS15	3356328	ILMN_1683781	6520458	-7.34e-05	0.493155	-0.337715	0.643935	0.43328	0.765845	-0.779437	0.443804	0.435722	0.82653	0.999878
ADAMTS16	2800026	ILMN_1726247	7320519	0.000220419	-1.85394	0.0509823	1.20738	0.593959	-1.5355	0.0858347	0.124724	0.931598	0.542836	0.999878
ADAMTS17	3641633	ILMN_1682989	1570435	0.000533627	-2.39596	-0.0101005	1.23534	0.453408	-1.93952	-0.0222769	0.0524943	0.982227	0.392547	0.999878
ADAMTS18	3700158	ILMN_1770152	3290133	-8.94e-05	0.637813	-0.0642811	1.14462	0.622497	0.557227	-0.103263	0.577397	0.917754	0.883574	0.999878
ADAMTS19	2827772	ILMN_1656171	70487	-0.000175638	0.305496	-0.363976	1.16178	0.577538	0.262956	-0.63022	0.792595	0.52855	0.950434	0.999878
ADAMTS2	2889916	ILMN_1811765	7150609	0.000113921	1.442	0.715382	1.17306	0.478136	1.22926	1.49619	0.219032	0.134605	0.667008	0.999878
ADAMTS20	3451558	ILMN_1651717	4060747	-0.000167927	0.235308	-0.529542	1.33055	0.456415	0.17685	-1.16022	0.859633	0.245959	0.968892	0.999878
ADAMTS3	2772876	ILMN_1703803	2120364	-7.53e-05	0.617599	0.556097	0.801828	0.423239	0.770239	1.31391	0.441195	0.188878	0.825557	0.999878
ADAMTS4	2440700	ILMN_2092933	1660497	9.37e-05	1.10097	-0.252858	0.946328	0.512972	1.16342	-0.492927	0.244716	0.622064	0.692581	0.999878
ADAMTS5	3927480	ILMN_1681886	6180332	-4.41e-05	-0.619067	-0.385465	0.608865	0.572577	-1.01676	-0.67321	0.309318	0.500813	0.737525	0.999878
ADAMTS6	2859601	ILMN_1767362	20100	-0.000204223	0.437739	0.16634	0.506855	0.457474	0.863637	0.363605	0.387828	0.716153	0.793031	0.999878
ADAMTS7	3634742	ILMN_2211790	3440451	-0.000212048	0.104304	-0.11435	0.949976	0.444696	0.109796	-0.257142	0.912576	0.797069	0.982009	0.999878
ADAMTS8	3398328	ILMN_1672403	2480239	-0.000198485	-0.00662489	-0.31248	1.02144	0.380622	-0.00648583	-0.820973	0.994825	0.411662	0.998436	0.999878
ADAMTS9	2680046	ILMN_1805543	1570382	0.000427729	-2.0798	0.234696	1.27229	0.562926	-1.63469	0.416921	0.102176	0.676736	0.505009	0.999878
ADAMTSL1	3163982	ILMN_1722621	6180209	-0.0001659	0.178412	-0.165698	0.97145	0.610941	0.183655	-0.271218	0.854291	0.786223	0.968138	0.999878
ADAMTSL3	3605395	ILMN_1798690	6280286	-0.000202208	-0.259497	-0.094136	1.2168	0.40777	-0.213262	-0.230856	0.831131	0.817427	0.963271	0.999878
ADAMTSL5	3845263	ILMN_1793040	3460356	-0.000190881	-0.334021	0.53989	0.869849	0.454349	-0.383998	1.18827	0.700996	0.234726	0.928229	0.999878
ADAP1	3034987	ILMN_2047511	830735	0.000968128	-1.61084	-0.0227447	0.747614	0.162762	-2.15464	-0.139742	0.0312372	0.888864	0.309868	0.999878
ADAP2	3716950	ILMN_1763000	3990433	4.06e-06	-0.572654	-0.00835839	0.655273	0.246781	-0.873918	-0.0338697	0.382205	0.972981	0.7893	0.999878
ADARB2	3273667	ILMN_1749493	6110519	0.000148319	-1.59787	-0.410668	1.05422	0.434881	-1.5157	-0.944321	0.129659	0.345005	0.551158	0.999878
ADAT1	3699707	ILMN_1657139	1710204	-4.76e-05	0.426561	-0.254318	0.536245	0.334864	0.795458	-0.759467	0.426384	0.447573	0.817057	0.999878
ADAT2	2977471	ILMN_1786688	2230722	0.000389064	0.822214	-1.27839	0.494351	0.61636	1.66322	-2.07409	0.0963309	0.0380705	0.49216	0.999878
ADC	2329196	ILMN_1659599	130707	-0.000206142	0.405146	-0.893143	0.876412	0.551826	0.462278	-1.61852	0.643902	0.10555	0.911399	0.999878
ADCK2	3027503	ILMN_1663132	1780647	-0.000148199	0.41674	-0.0204549	0.619256	0.299719	0.672969	-0.068247	0.500998	0.945589	0.852325	0.999878
ADCK3	2383356	ILMN_1731064	6220180	-6.52e-05	-0.711335	-0.062947	0.837115	0.239388	-0.849745	-0.26295	0.395507	0.792589	0.798692	0.999878
ADCK5	3120481	ILMN_1761309	2480709	-0.000187027	-0.277453	-0.445282	1.04799	0.480252	-0.264746	-0.927184	0.791216	0.353831	0.950434	0.999878
ADCY1	3000342	ILMN_1742073	610592	-0.000164133	0.796638	-0.886044	1.22589	0.523024	0.649842	-1.69408	0.515824	0.0902499	0.860166	0.999878
ADCY2	2800711	ILMN_1810691	2970288	2.62e-05	1.35296	-0.133312	1.16127	0.484322	1.16506	-0.275255	0.244048	0.783121	0.692111	0.999878
ADCY3	2544484	ILMN_1676893	3800050	-0.000202458	0.0449293	-0.0548471	0.953246	0.311941	0.047133	-0.175825	0.962409	0.860431	0.993051	0.999878
ADCY4	3558168	ILMN_2148944	6330224	-0.000134086	-0.992915	-0.12209	0.978941	0.412565	-1.01427	-0.295928	0.3105	0.767285	0.738736	0.999878
ADCY7	3659966	ILMN_1655935	50735	-0.000223218	-0.266042	-0.0502644	1.13696	0.34342	-0.233995	-0.146364	0.814999	0.883634	0.958424	0.999878
ADCY8	3153716	ILMN_1754440	5310431	0.00016519	-1.34616	0.184156	1.08701	0.520203	-1.2384	0.354008	0.215624	0.723333	0.66349	0.999878
ADCY9	3677913	ILMN_1654287	3060100	9.04e-05	0.667514	0.20497	0.708267	0.425395	0.942461	0.481835	0.346002	0.629924	0.763011	0.999878
ADCYAP1	3775906	ILMN_1763344	3060064	-0.000147513	0.378914	-0.583233	0.736925	0.621141	0.514182	-0.93897	0.607147	0.347746	0.895239	0.999878
ADD3	3263555	ILMN_1787378	1010477	-6.89e-05	0.670345	-0.10037	0.684786	0.194477	0.978913	-0.516106	0.32767	0.605781	0.752941	0.999878
ADH1A	2779199	ILMN_1764309	3370347	-0.000202702	-0.0207049	0.00272404	0.339187	0.491814	-0.0610427	0.00553875	0.951328	0.995581	0.991925	0.999878
ADH1B	2779231	ILMN_1811598	2490612	-0.000138083	-0.187041	0.423591	0.544872	0.509587	-0.343276	0.831245	0.731406	0.405835	0.937042	0.999878
ADH1C	2779271	ILMN_1740717	1510750	-0.000215244	0.108447	0.21546	0.484405	0.426738	0.223877	0.504901	0.822862	0.613628	0.960709	0.999878
ADH4	2779124	ILMN_1797912	7550632	-0.000236019	0.315123	-0.632026	0.762335	0.541711	0.413366	-1.16672	0.679356	0.243323	0.921681	0.999878
ADH5	2779095	ILMN_1738604	1470035	0.000181402	-0.867633	-0.163777	0.619197	0.456331	-1.40122	-0.358899	0.161209	0.719671	0.597898	0.999878
ADH6	2779163	ILMN_1691175	3800368	-9.91e-05	0.453319	0.025955	0.713693	0.536785	0.635173	0.0483527	0.525344	0.961435	0.864455	0.999878
ADHFE1	3101629	ILMN_2363634	3890598	0.00208584	1.57799	0.120856	0.5258	0.395772	3.00113	0.305367	0.002703	0.760086	0.0912357	0.999878
ADI1	2538600	ILMN_1813975	6620278	4.29e-05	-0.584815	-0.68168	0.561435	0.279019	-1.04164	-2.44313	0.297627	0.0145605	0.729057	0.999878
ADIG	3884737	ILMN_1743331	3800722	-0.000174926	-0.246153	-0.301186	0.613803	0.611752	-0.401029	-0.492334	0.688416	0.622484	0.923765	0.999878
ADIPOQ	2656818	ILMN_1775045	4200471	0.00177571	1.72217	-0.156254	0.547575	0.391346	3.14508	-0.399274	0.00167008	0.689692	0.0686843	0.999878
ADIPOR1	2451463	ILMN_2096322	3460201	0.00132432	0.99032	0.0579669	0.390964	0.0768349	2.53302	0.754435	0.0113386	0.450588	0.191627	0.999878
ADIPOR2	3400625	ILMN_2224833	6960685	-0.000115826	0.367772	0.221006	0.735685	0.26207	0.499904	0.84331	0.617165	0.399055	0.899254	0.999878
ADK	3252170	ILMN_1768062	3130450	0.00102089	-1.25725	-0.124769	0.464341	0.529274	-2.7076	-0.235737	0.00680003	0.813637	0.152306	0.999878
ADM	3320123	ILMN_1708934	5670465	0.000796729	-1.8307	-0.039757	0.697005	0.104156	-2.62652	-0.381706	0.00865242	0.702679	0.169213	0.999878
ADM2	3950832	ILMN_1702933	2970452	-0.000155821	-0.316577	0.566339	1.0326	0.547709	-0.306582	1.03401	0.759174	0.30113	0.943055	0.999878
ADNP	3909354	ILMN_1657993	360678	-6.15e-05	-0.412318	-0.540068	0.607652	0.350122	-0.678543	-1.54251	0.497459	0.122949	0.849376	0.999878
ADNP2	3795501	ILMN_2080751	7330270	-0.000157898	0.398802	-1.06124	0.664583	0.434991	0.600079	-2.43967	0.548481	0.0147005	0.872899	0.999878
ADO	3248824	ILMN_1690352	4480546	0.00052993	-0.984587	0.110978	0.563886	0.368877	-1.74607	0.300853	0.0808592	0.763527	0.459715	0.999878
ADORA2B	3711869	ILMN_1703946	2060040	-0.000122746	0.187593	-0.0972055	0.575993	0.504735	0.325685	-0.192587	0.744676	0.847282	0.939646	0.999878
ADPRH	2638059	ILMN_1794512	5550369	0.000283922	-0.75027	-0.336888	0.547493	0.445572	-1.37037	-0.75608	0.170631	0.449602	0.609905	0.999878
ADPRHL1	3526524	ILMN_1795788	1990070	-0.000226233	0.292843	0.383674	0.786094	0.600292	0.372529	0.639145	0.709515	0.522729	0.930422	0.999878
ADPRHL2	2330253	ILMN_1811480	730010	-0.00012648	0.745523	0.172998	0.672207	0.366879	1.10907	0.471539	0.267455	0.637256	0.707207	0.999878
ADPRM	3710277	ILMN_1702526	6580129	-0.000138073	-0.164645	-0.443654	0.398187	0.411443	-0.413488	-1.07829	0.679267	0.280905	0.921681	0.999878
ADRA1B	2837970	ILMN_1679754	2140022	-0.00017498	0.325179	0.0761511	0.752421	0.592466	0.432177	0.128532	0.665632	0.897728	0.917698	0.999878
ADRA1D	3895891	ILMN_1716421	1340630	-5.41e-05	-0.576655	0.467313	0.605282	0.663873	-0.952704	0.703919	0.340786	0.481483	0.761547	0.999878
ADRA2A	3264059	ILMN_1659371	5720523	-0.000201176	-0.105748	0.475697	0.875258	0.368986	-0.120819	1.2892	0.903839	0.197328	0.979921	0.999878
ADRA2B	2565082	ILMN_1677868	3390286	0.000356432	1.35827	0.52009	0.755454	0.374369	1.79795	1.38924	0.0722454	0.164759	0.442132	0.999878
ADRA2C	2716328	ILMN_1733963	3460672	0.000471299	-1.89162	0.116937	0.915872	0.145545	-2.06537	0.80344	0.0389391	0.42172	0.338604	0.999878
ADRB1	3265140	ILMN_1804255	7050440	0.000331245	-1.42425	0.429268	0.798286	0.463856	-1.78413	0.925434	0.0744628	0.35474	0.44819	0.999878
ADRB2	2834743	ILMN_1695590	7570326	0.000804684	-1.44086	0.171334	0.622403	0.209482	-2.315	0.817895	0.0206528	0.413417	0.257626	0.999878
ADRB3	4049835	ILMN_1694007	1430722	-0.000144853	-0.270849	-0.22637	0.495898	0.484135	-0.546178	-0.467576	0.584968	0.640088	0.886649	0.999878
ADRBK2	3940631	ILMN_1668900	2120528	0.000109249	-0.499242	-0.142336	0.533869	0.461272	-0.93514	-0.308573	0.349761	0.757646	0.765744	0.999878
ADSS	2464353	ILMN_1778796	6020333	0.000553993	1.08242	-0.891286	0.576175	0.338296	1.87863	-2.63463	0.0603532	0.00842287	0.4151	0.999878
ADSSL1	3554360	ILMN_2240009	4900703	-8.35e-05	0.885306	-0.606435	0.981984	0.463939	0.901549	-1.30714	0.36734	0.191164	0.777821	0.999878
AEBP1	2999755	ILMN_1736178	6580711	-0.000114484	1.10504	0.744311	1.06104	0.387195	1.04146	1.92231	0.29771	0.0545665	0.729057	0.999878
AEBP2	3407229	ILMN_1803376	4260671	7.12e-05	0.734941	0.0179394	0.707241	0.41878	1.03917	0.0428374	0.298778	0.965831	0.729249	0.999878
AEN	3607232	ILMN_1814282	4480288	-0.000115289	-0.405252	0.439407	0.649752	0.340425	-0.623704	1.29076	0.53285	0.196787	0.868028	0.999878
AES	3846114	ILMN_2333107	6180176	0.000405685	1.36527	0.0490912	0.700137	0.178957	1.95	0.274318	0.0512311	0.78384	0.388017	0.999878
AFAP1	2759582	ILMN_1701998	2690187	0.000404755	1.0301	0.36675	0.746727	0.363979	1.37949	1.00761	0.167805	0.31364	0.607721	0.999878
AFAP1L1	2834957	ILMN_1694140	20154	-0.000154648	0.603894	0.336738	0.815625	0.465867	0.740406	0.722821	0.459088	0.46979	0.833637	0.999878
AFF4	2875555	ILMN_1708502	2360189	-1.08e-05	0.727038	-0.236243	0.788921	0.300681	0.92156	-0.785693	0.356802	0.432047	0.769787	0.999878
AFG3L2	3799415	ILMN_2066124	1170538	-0.000196347	-0.0252319	-0.147935	0.582806	0.343585	-0.0432938	-0.430563	0.965469	0.666786	0.993932	0.999878
AFM	2731257	ILMN_1777797	3120681	-0.000196847	-0.018464	-0.0680283	0.756467	0.524904	-0.0244082	-0.129601	0.980528	0.896882	0.9974	0.999878
AFP	2731230	ILMN_1782204	2030161	-0.000176512	-0.137538	-0.0918743	0.790957	0.485412	-0.173888	-0.189271	0.86196	0.84988	0.968991	0.999878
AFTPH	2485433	ILMN_2402766	450097	-0.000145828	0.420217	0.409461	0.885279	0.328219	0.474671	1.24752	0.635042	0.212206	0.908064	0.999878
AGA	2794902	ILMN_1802631	130064	-0.000214936	0.0539086	-0.556228	0.517962	0.351992	0.104078	-1.58023	0.917111	0.114055	0.983233	0.999878
AGAP1	2533670	ILMN_1800530	4220692	-0.000117833	0.516298	-0.138731	0.616633	0.337137	0.837286	-0.411499	0.402472	0.680707	0.802542	0.999878
AGAP11	3256221	ILMN_1669848	2260341	-6.22e-05	-0.337069	0.80592	0.259792	0.484131	-1.29746	1.66467	0.194533	0.0959782	0.644261	0.999878
AGAP2	3458735	ILMN_1735591	3140608	-0.000198145	-0.002291	0.254707	1.07737	0.554039	-0.00212648	0.459727	0.998303	0.645712	0.99956	0.999878
AGBL1	3606682	ILMN_2100055	990220	8.36e-06	-0.882438	0.482786	0.652669	0.571184	-1.35204	0.845238	0.176422	0.397978	0.619791	0.999878
AGBL2	3372420	ILMN_1688627	4890338	0.000855351	1.3733	-0.750416	0.56073	0.503693	2.44913	-1.48983	0.0143542	0.136269	0.215172	0.999878
AGBL4	2411642	ILMN_2196642	520379	-0.000199508	-0.183999	0.252832	0.728091	0.546798	-0.252714	0.462386	0.800499	0.643804	0.953218	0.999878
AGBL5	2474161	ILMN_2290776	6620403	9.42e-05	0.808972	1.13625	0.730941	0.536887	1.10675	2.11636	0.268453	0.0343138	0.708466	0.999878
AGFG1	2530599	ILMN_2196734	1500341	-0.00021517	-0.327576	-0.734472	0.763728	0.469929	-0.428918	-1.56294	0.668002	0.118067	0.918252	0.999878
AGFG2	3015603	ILMN_1703228	7160193	-0.000157111	-0.409044	-0.0345539	0.883877	0.396196	-0.462783	-0.0872143	0.64354	0.930501	0.911399	0.999878
AGGF1	2816563	ILMN_1776153	5130102	0.00135866	-2.27002	-0.190728	0.925627	0.458385	-2.45242	-0.416087	0.0142237	0.677347	0.214382	0.999878
AGK	3027808	ILMN_1772645	7560452	0.000321124	0.891701	-0.360018	0.596527	0.406832	1.49482	-0.88493	0.135024	0.376194	0.558351	0.999878
AGL	2348634	ILMN_2277492	2060255	-0.000170534	-0.342186	-0.371665	0.777433	0.601014	-0.440149	-0.618396	0.659848	0.536314	0.91519	0.999878
AGMAT	2397732	ILMN_1707169	4890255	-0.000178983	0.403136	-0.562629	0.770574	0.429047	0.523163	-1.31135	0.600884	0.189741	0.89312	0.999878
AGMO	3039399	ILMN_1812678	70279	-8.39e-05	0.440339	-0.150245	0.781927	0.517432	0.563146	-0.290367	0.573361	0.771535	0.882485	0.999878
AGO1	2330075	ILMN_1671326	1710102	0.00038042	1.60741	-0.356185	0.780975	0.343915	2.05821	-1.03568	0.0396218	0.300352	0.341791	0.999878
AGO2	3156193	ILMN_1695719	290468	0.00295539	2.58539	0.40113	0.671159	0.17741	3.85213	2.26104	0.00011855	0.023757	0.0177049	0.999878
AGPAT2	3230282	ILMN_2377430	5560102	-0.000157521	-0.381109	0.00305295	0.923286	0.276776	-0.412775	0.0110304	0.679789	0.991199	0.921735	0.999878
AGPAT3	3923426	ILMN_2288175	2120204	0.000626896	0.592644	-0.161771	0.350962	0.540514	1.68863	-0.299291	0.0913526	0.764718	0.484507	0.999878
AGPAT4	2983030	ILMN_1732672	1440364	0.00423142	3.07684	0.30849	0.655841	0.472385	4.69143	0.653048	2.78e-06	0.513725	0.00136215	0.999878
AGPAT4-IT1	2983138	ILMN_1655572	110048	0.000864135	0.847503	0.971202	0.328873	0.395211	2.577	2.45743	0.0099945	0.0139936	0.182015	0.999878
AGPAT5	3083936	ILMN_1662049	830719	0.000729291	-1.04628	-0.485727	0.558774	0.453746	-1.87246	-1.07048	0.0612015	0.284402	0.41689	0.999878
AGPAT6	3095815	ILMN_1740752	4560156	-0.000152131	-0.36507	-0.118135	0.661004	0.449636	-0.552296	-0.262735	0.58077	0.792755	0.885073	0.999878
AGPAT9	2734047	ILMN_1794875	2060477	0.000255098	-0.838472	-0.130796	0.507791	0.256787	-1.65122	-0.509354	0.098757	0.610504	0.495978	0.999878
AGPS	2517408	ILMN_1698209	7560154	-0.000196094	-0.220246	-0.296595	0.667907	0.421403	-0.329755	-0.703827	0.741599	0.48154	0.939241	0.999878
AGR3	3039830	ILMN_1728787	5290273	0.000852207	-1.29102	0.495501	0.646212	0.479448	-1.99783	1.03348	0.0457892	0.301378	0.367106	0.999878
AGRP	3695726	ILMN_1770336	2690392	0.000115403	-0.826798	-0.193039	0.534526	0.442911	-1.54679	-0.435842	0.121977	0.662952	0.541172	0.999878
AGT	2460296	ILMN_1813530	2850301	-0.00015908	0.34872	0.225496	0.697251	0.439215	0.500135	0.513406	0.617002	0.607667	0.899126	0.999878
AGTPBP1	3212728	ILMN_1718071	4760427	0.000431813	-1.04161	-0.0884752	0.663029	0.234043	-1.57099	-0.378029	0.116248	0.705409	0.530845	0.999878
AGTRAP	2320411	ILMN_1802458	4610220	0.000466088	-1.05842	0.114784	0.57744	0.242548	-1.83296	0.473243	0.0668678	0.63604	0.429737	0.999878
AGXT	2535976	ILMN_1709796	270709	-0.000219745	0.247105	0.129059	1.00305	0.510329	0.246353	0.252893	0.805419	0.800351	0.954478	0.999878
AGXT2	2853055	ILMN_1783963	6350753	-0.000205177	-0.111401	0.00114471	0.846566	0.560495	-0.131592	0.00204232	0.895312	0.99837	0.977493	0.999878
AHCYL1	2351121	ILMN_1770412	1170440	-0.000184547	0.223823	0.0926074	0.810775	0.229849	0.27606	0.402905	0.782513	0.687018	0.948334	0.999878
AHCYL2	3023384	ILMN_1712786	870039	0.000649042	1.72507	-0.179369	0.758176	0.421074	2.27529	-0.425981	0.0229307	0.670122	0.270013	0.999878
AHNAK	3375735	ILMN_1752159	3710400	0.000275383	-1.09079	-0.41033	0.576571	0.385659	-1.89186	-1.06397	0.0585674	0.287341	0.411068	0.999878
AHR	2991233	ILMN_2162799	6060367	-0.000197225	-0.0529981	-0.0274464	0.533426	0.452611	-0.0993542	-0.0606401	0.920861	0.951646	0.983796	0.999878
AHSA1	3545466	ILMN_1703617	4880561	0.000581781	1.22089	0.35528	0.671187	0.363283	1.819	0.977973	0.06897	0.328088	0.433536	0.999878
AHSA2	2484552	ILMN_1798308	1170220	1.36e-05	-0.603186	-0.386632	0.521022	0.257231	-1.1577	-1.50305	0.247042	0.132826	0.694056	0.999878
AHSG	2656598	ILMN_1730625	2320377	-0.000109364	-0.463878	-0.269749	0.706377	0.536938	-0.6567	-0.502384	0.511404	0.615397	0.857727	0.999878
AHSP	3657253	ILMN_1696512	2350274	0.00256572	0.581088	0.0378633	0.163617	0.0470529	3.5515	0.804697	0.00038654	0.420995	0.0338566	0.999878
AICDA	3443206	ILMN_2164164	6110358	-6.71e-05	0.378459	0.14843	0.545628	0.393092	0.693621	0.377595	0.487952	0.705732	0.843685	0.999878
AIF1L	3191877	ILMN_1770725	4010647	-0.000216708	-0.217912	-0.271994	0.831947	0.590031	-0.261931	-0.460981	0.793386	0.644812	0.950434	0.999878
AIFM1	4021469	ILMN_1668408	3290341	-6.85e-06	0.59929	-0.598234	0.661931	0.430476	0.905365	-1.3897	0.365315	0.164619	0.777328	0.999878
AIG1	2928690	ILMN_1797974	3940056	0.00030862	-0.707146	-0.526868	0.450212	0.458376	-1.5707	-1.14942	0.116316	0.250382	0.530845	0.999878
AIM1L	2402645	ILMN_1740590	380427	-5.17e-05	-0.639149	0.00670358	0.763694	0.473212	-0.836918	0.0141661	0.402679	0.988697	0.80256	0.999878
AIM2	2439554	ILMN_2214232	130753	0.000192039	-0.271886	-0.172541	0.265952	0.531364	-1.02231	-0.324713	0.306682	0.745398	0.735134	0.999878
AIMP1	2738466	ILMN_1715351	3710632	0.000126652	-1.0988	-0.443439	0.589378	0.577864	-1.86434	-0.767377	0.062332	0.442857	0.420123	0.999878
AIMP2	2988882	ILMN_1673252	6960056	0.000911638	1.39495	-0.138093	0.539197	0.339268	2.58708	-0.407033	0.00970699	0.683984	0.180721	0.999878
AIP	3337137	ILMN_2103841	610689	-0.000206457	-0.153857	0.0568565	0.560238	0.265749	-0.274627	0.213948	0.783614	0.830588	0.948562	0.999878
AIRE	3923608	ILMN_2261519	5820386	-0.000220253	-0.801129	-0.0769112	1.26639	0.11251	-0.632608	-0.683593	0.527018	0.494232	0.865208	0.999878
AJAP1	2317686	ILMN_1723521	1300647	-0.000168178	0.271233	-0.725882	0.732304	0.542893	0.370383	-1.33706	0.711113	0.181202	0.931261	0.999878
AJUBA	3556990	ILMN_1811535	4280187	-8.14e-05	0.676608	0.14719	0.783244	0.584477	0.863853	0.251832	0.38771	0.801171	0.793031	0.999878
AK2	2405364	ILMN_1670542	1990491	-0.000106755	-0.438388	0.0269005	0.436441	0.3575	-1.00446	0.075246	0.315205	0.940019	0.74213	0.999878
AK3	3197318	ILMN_1778173	670463	0.000267567	0.508399	0.150118	0.390302	0.32926	1.30258	0.455924	0.192778	0.648445	0.641705	0.999878
AK4	2340315	ILMN_1764090	4290192	0.000241111	-0.767068	0.309105	0.493707	0.402638	-1.55369	0.767699	0.120321	0.442666	0.537384	0.999878
AK7	3550343	ILMN_1684305	2760470	4.41e-05	0.821799	-0.580836	0.845662	0.580306	0.971781	-1.00091	0.331206	0.316869	0.755395	0.999878
AK8	3228279	ILMN_1659914	6330358	-0.000176312	-0.227212	0.202401	0.797445	0.433209	-0.284925	0.467213	0.775713	0.640347	0.946917	0.999878
AKAP10	3749086	ILMN_1718808	460020	-7.6e-05	-0.34026	0.447305	0.707522	0.316264	-0.480918	1.41434	0.630595	0.157262	0.905898	0.999878
AKAP11	3487220	ILMN_1693220	6420398	0.00154044	-2.0423	-0.113468	0.661033	0.362574	-3.08955	-0.312951	0.00201551	0.754318	0.0781836	0.999878
AKAP12	2931569	ILMN_2308950	6940475	0.00290266	-2.25014	-0.260129	0.624369	0.44489	-3.60387	-0.584704	0.000316549	0.558747	0.0295691	0.999878
AKAP14	3989006	ILMN_1679987	270192	0.000374667	-0.90999	-0.313338	0.540052	0.473224	-1.685	-0.662134	0.0920498	0.507885	0.485643	0.999878
AKAP3	3441280	ILMN_1808905	4860088	-0.000206035	-0.100256	0.352671	0.666782	0.487898	-0.150358	0.722838	0.880488	0.469779	0.97392	0.999878
AKAP4	4008170	ILMN_2268556	510008	-0.000186867	-0.0718689	-0.341917	0.562589	0.473251	-0.127747	-0.722485	0.898355	0.469996	0.978414	0.999878
AKAP6	3531553	ILMN_1770758	1510224	0.000290958	-0.39313	0.17507	0.296577	0.576557	-1.32556	0.303648	0.185047	0.761396	0.634552	0.999878
AKAP7	2925724	ILMN_1703049	4780619	-0.00020011	0.0454893	0.349918	0.36156	0.38769	0.125814	0.902572	0.899884	0.366753	0.97896	0.999878
AKAP8	3853299	ILMN_1741572	6550053	-0.00019913	-0.0338696	0.268118	0.902573	0.386448	-0.0375256	0.693802	0.970067	0.487806	0.995497	0.999878
AKAP8L	3853345	ILMN_1768962	5340593	-0.000159573	-0.278509	0.531496	0.825278	0.328418	-0.337473	1.61835	0.735774	0.105587	0.938309	0.999878
AKIRIN1	2331158	ILMN_1658337	5820133	0.000127296	0.779553	-0.393661	0.597907	0.295964	1.3038	-1.3301	0.19236	0.183487	0.641186	0.999878
AKIRIN2	2963784	ILMN_2148847	5690202	0.000421173	-0.992204	-0.208741	0.569286	0.247623	-1.74289	-0.842978	0.0814136	0.399241	0.46051	0.999878
AKR1A1	2334374	ILMN_1774938	5550543	0.000148792	-0.503091	-0.301845	0.345522	0.359516	-1.45603	-0.839588	0.145446	0.40114	0.572063	0.999878
AKR1B1	3073981	ILMN_1701731	4260139	-0.000199008	0.0254962	-0.148595	0.435792	0.267435	0.0585054	-0.55563	0.953348	0.578464	0.991925	0.999878
AKR1B10	3025433	ILMN_1672148	5310646	-0.000153491	0.14622	-0.399775	0.432785	0.609093	0.337859	-0.656345	0.735484	0.511602	0.938309	0.999878
AKR1C4	3233119	ILMN_1668880	2650736	8.11e-05	0.808335	0.498873	0.525436	0.601052	1.53841	0.83	0.124012	0.406539	0.542762	0.999878
AKR1C6P	3274716	ILMN_2290896	2640121	-0.000146312	0.128644	0.474288	0.321505	0.437526	0.400129	1.08402	0.689078	0.278355	0.924234	0.999878
AKR1E2	3232944	ILMN_1694985	5720372	-0.000167964	0.0889866	0.768968	0.228216	0.5128	0.389923	1.49955	0.69661	0.133732	0.926437	0.999878
AKR7A2	2399718	ILMN_1677043	6180681	-0.000208098	-0.220953	0.191991	0.616931	0.249456	-0.358148	0.769636	0.720248	0.441516	0.933541	0.999878
AKR7A3	2399743	ILMN_2145396	70484	0.000179973	0.893144	0.163624	0.617445	0.401671	1.44652	0.407359	0.148094	0.683745	0.57517	0.999878
AKR7L	2399687	ILMN_1702696	4180161	-0.000196161	0.0508251	-0.518763	0.337684	0.484583	0.150511	-1.07054	0.880368	0.284378	0.97392	0.999878
AKT1	3581132	ILMN_1748661	7210424	0.000841578	-1.83698	-0.303506	0.812064	0.381979	-2.26212	-0.794562	0.0237326	0.426869	0.275774	0.999878
AKT1S1	3868160	ILMN_1726906	3870092	-7.14e-05	-0.606299	0.299913	0.711891	0.382281	-0.851674	0.784535	0.394436	0.432726	0.798039	0.999878
AKTIP	3691967	ILMN_2377240	4480338	-0.000154647	0.160483	-0.568459	0.289237	0.298926	0.554847	-1.90167	0.579024	0.057214	0.883987	0.999878
ALAD	3221395	ILMN_1679898	6020592	-0.000151107	0.256577	-0.00914521	0.772736	0.45909	0.332037	-0.0199203	0.739875	0.984107	0.939241	0.999878
ALAS1	2623515	ILMN_1700047	5220097	-0.000197247	0.0833464	-0.245093	0.678788	0.571907	0.122787	-0.428554	0.902281	0.668248	0.979921	0.999878
ALAS2	4009849	ILMN_2271875	5270338	0.00246194	0.666028	0.181606	0.192614	0.120121	3.45785	1.51186	0.000549014	0.130569	0.041302	0.999878
ALB	2731192	ILMN_1682763	5910010	-0.000187488	0.244425	0.11283	0.768282	0.489552	0.318146	0.230475	0.750388	0.817723	0.940913	0.999878
ALDH16A1	3838522	ILMN_2051381	940441	-8.36e-05	-0.718687	0.499484	1.37073	0.413277	-0.524309	1.20859	0.600086	0.226819	0.893052	0.999878
ALDH1A1	3209726	ILMN_2096372	1070477	7.24e-05	0.349636	-0.27527	0.356828	0.182801	0.979844	-1.50585	0.32721	0.132107	0.752496	0.999878
ALDH1A2	3626312	ILMN_2383707	5700102	-0.00016865	-0.24935	-0.381882	0.712152	0.45114	-0.350137	-0.846483	0.726251	0.397284	0.935977	0.999878
ALDH1A3	3611625	ILMN_2139970	4920148	-0.00023492	-0.649689	-0.578133	0.918687	0.534716	-0.707193	-1.0812	0.479479	0.27961	0.840574	0.999878
ALDH2	3432090	ILMN_1793859	840253	8.21e-05	0.72822	0.237483	0.636669	0.211705	1.1438	1.12176	0.252762	0.261962	0.698802	0.999878
ALDH3A2	3714068	ILMN_1667564	460746	-0.000130304	0.620715	-1.2432	0.689488	0.520189	0.900256	-2.38991	0.368027	0.0168527	0.778842	0.999878
ALDH5A1	2898499	ILMN_2372403	2640274	0.00235062	1.54308	-0.24943	0.445988	0.281797	3.45992	-0.885143	0.00054481	0.376079	0.041302	0.999878
ALDH6A1	3571727	ILMN_1785284	5820373	-0.000179959	0.14942	-0.271117	0.518839	0.410839	0.287989	-0.65991	0.773367	0.509312	0.946771	0.999878
ALDH7A1	2873785	ILMN_1763461	4150544	1.37e-05	0.213539	-0.566354	0.226414	0.447559	0.943133	-1.26543	0.345658	0.205718	0.762993	0.999878
ALDH8A1	2975257	ILMN_2365176	2100546	0.0011675	2.13186	-0.3973	0.751608	0.42379	2.8364	-0.937493	0.00458076	0.348505	0.122496	0.999878
ALDOB	3218077	ILMN_1747716	650427	-0.00021116	-0.612237	-0.258446	0.707285	0.28958	-0.865616	-0.892486	0.386742	0.372132	0.792811	0.999878
ALDOC	3750767	ILMN_1755974	7330544	-0.000171329	-0.237467	-0.0999862	0.541052	0.220825	-0.4389	-0.452785	0.660753	0.650704	0.915254	0.999878
ALG1	3646542	ILMN_1718093	5560670	0.000412183	0.865984	-0.883757	0.470712	0.524797	1.83973	-1.684	0.0658666	0.0921819	0.427866	0.999878
ALG12	3965393	ILMN_1743995	6940735	0.000113424	-1.20537	-0.124006	1.15022	0.455076	-1.04794	-0.272495	0.294714	0.785241	0.727437	0.999878
ALG13	3987492	ILMN_1724341	2230215	-0.000206667	-0.040618	-0.0969235	0.572355	0.380511	-0.0709663	-0.254719	0.943427	0.79894	0.990579	0.999878
ALG14	2424148	ILMN_2191822	2340524	0.000618961	-0.890706	-0.0805615	0.382828	0.553409	-2.32665	-0.145573	0.0200236	0.884258	0.252654	0.999878
ALG1L	2693332	ILMN_2131293	1440474	-0.000193231	0.0286711	-0.741006	0.199722	0.532253	0.143555	-1.39221	0.885858	0.16386	0.975452	0.999878
ALG2	3217487	ILMN_1737945	1990021	0.000631025	-1.5137	0.0726896	0.751766	0.417941	-2.01353	0.173923	0.0441121	0.861926	0.361988	0.999878
ALG5	3509885	ILMN_1664449	6370113	-0.000101317	-0.314551	-0.167526	0.593129	0.350428	-0.530325	-0.478061	0.59591	0.632607	0.892125	0.999878
ALG6	2339682	ILMN_1771411	6960243	0.00168952	-1.50785	-0.65219	0.506277	0.346603	-2.97831	-1.88166	0.00291224	0.0598819	0.0951018	0.999878
ALG8	3383164	ILMN_2365686	2970296	-0.000171878	0.15032	-0.712586	0.520588	0.377051	0.288751	-1.88989	0.772784	0.0587726	0.946346	0.999878
ALK	2546409	ILMN_1753135	630368	0.000208667	2.23492	-0.563098	1.27265	0.456884	1.75612	-1.23248	0.0791292	0.217772	0.457966	0.999878
ALKBH1	3573229	ILMN_2375973	7160167	0.000963833	1.0905	-0.574528	0.491377	0.473695	2.21927	-1.21287	0.0265128	0.225181	0.292472	0.999878
ALKBH2	3470689	ILMN_1690252	1340537	-0.000207694	-0.0756338	0.459224	0.515117	0.495841	-0.146829	0.926152	0.883273	0.354367	0.974585	0.999878
ALKBH3	3328214	ILMN_2134062	4610369	-0.000187817	0.345302	-0.86757	0.584546	0.383212	0.590717	-2.26394	0.554737	0.0235777	0.875134	0.999878
ALKBH4	3065007	ILMN_1805673	1780379	-0.000138121	0.399083	0.424258	0.658482	0.523046	0.606065	0.81113	0.544499	0.417291	0.871083	0.999878
ALKBH5	3713093	ILMN_1657283	1400209	0.000347247	1.55556	0.148398	0.957719	0.232008	1.62423	0.639623	0.104389	0.522418	0.510091	0.999878
ALKBH7	3818395	ILMN_1761764	3310324	7.53e-06	-0.553126	0.147952	0.550924	0.328901	-1.004	0.449836	0.315428	0.652829	0.742365	0.999878
ALKBH8	3389878	ILMN_1779190	6420044	0.00157906	-1.39975	-0.216094	0.471169	0.423397	-2.97081	-0.510382	0.00298419	0.609784	0.0964063	0.999878
ALLC	2467249	ILMN_1796946	2100465	2.35e-05	0.633393	-0.500846	0.733034	0.579015	0.86407	-0.864996	0.387591	0.387041	0.793031	0.999878
ALMS1	2488785	ILMN_1709474	5130736	-0.000181928	0.142785	0.514309	0.683734	0.465787	0.208831	1.10417	0.834588	0.269518	0.964308	0.999878
ALMS1P	2488898	ILMN_1774369	4250400	-0.000194155	0.0349636	0.165051	0.715113	0.435168	0.0488924	0.379281	0.961007	0.704479	0.993035	0.999878
ALOX12	3708160	ILMN_1713731	6040259	-0.000219494	-0.0418593	0.772544	0.283088	0.25296	-0.147867	3.05401	0.882454	0.00225803	0.974585	0.999878
ALOX12B	3744072	ILMN_1692332	7510671	-0.000163906	0.528784	-0.39398	1.04039	0.575353	0.508257	-0.684763	0.611295	0.493494	0.896551	0.999878
ALOX15	3742212	ILMN_1729320	1450719	0.000149224	-0.576116	-0.791366	0.402453	0.471911	-1.43151	-1.67694	0.152346	0.0935539	0.585627	0.999878
ALOX15B	3709417	ILMN_2393149	5810154	-3.21e-05	-1.3896	0.5395	1.16921	0.423094	-1.18849	1.27513	0.234695	0.202264	0.683244	0.999878
ALOX5	3244622	ILMN_1680996	1780273	-0.000145093	0.36046	0.070475	0.642804	0.130692	0.560761	0.539246	0.574985	0.589717	0.88307	0.999878
ALOX5AP	3484060	ILMN_1797875	3930343	0.0014055	1.28609	0.0570142	0.470299	0.138682	2.73462	0.411114	0.00626712	0.680989	0.148479	0.999878
ALPI	2532314	ILMN_1752669	2570162	1.27e-05	-1.00314	0.378599	0.872582	0.461142	-1.14963	0.821002	0.250352	0.411645	0.696064	0.999878
ALPK2	3810133	ILMN_1811238	5270519	-0.000193274	0.177859	-0.373712	0.851657	0.476048	0.208838	-0.785029	0.834583	0.432437	0.964308	0.999878
ALPK3	3605884	ILMN_1734630	5810017	-0.000129456	-0.750678	0.564642	1.42972	0.435166	-0.525054	1.29753	0.599569	0.194447	0.89304	0.999878
ALPP	2532272	ILMN_1693789	2600133	-0.000240694	0.0981118	-0.137522	0.34908	0.118599	0.281058	-1.15955	0.778677	0.24623	0.947313	0.999878
ALS2CL	2672230	ILMN_1700596	4060037	-0.000170594	-0.418409	0.165957	1.29869	0.498054	-0.322178	0.33321	0.747331	0.738975	0.940002	0.999878
ALS2CR11	2594905	ILMN_1792449	1450431	-0.000166728	0.444249	0.280966	0.895908	0.573865	0.495864	0.489604	0.620012	0.624414	0.901634	0.999878
ALS2CR12	2594773	ILMN_1765674	2100626	0.000545467	0.639773	0.144682	0.350207	0.405457	1.82684	0.356836	0.0677822	0.721214	0.430977	0.999878
ALX1	3424785	ILMN_1724540	4210719	-0.000199718	0.419351	-0.655558	0.504178	0.477974	0.831751	-1.37153	0.405589	0.170209	0.804899	0.999878
ALX3	2427342	ILMN_2191902	3520619	-0.000154964	-0.411792	-0.789158	0.957763	0.597632	-0.429952	-1.32048	0.667249	0.186676	0.918058	0.999878
ALX4	3370869	ILMN_1803384	4230358	-0.000161452	0.511082	-1.03239	0.891282	0.519583	0.573423	-1.98696	0.566384	0.0469266	0.879064	0.999878
ALYREF	3774331	ILMN_2364062	1660309	-0.000170124	-0.279148	-0.234689	0.337129	0.299821	-0.828015	-0.782764	0.407701	0.433766	0.805245	0.999878
AMACR	2852742	ILMN_1792741	5870286	-0.000154485	-0.318542	0.0450967	0.700748	0.420416	-0.454575	0.107267	0.649435	0.914577	0.91211	0.999878
AMBN	4047460	ILMN_1697611	6450037	0.000500161	-0.823493	0.0301242	0.455608	0.451643	-1.80746	0.0666992	0.0707506	0.946821	0.438326	0.999878
AMBP	3221800	ILMN_1695446	4900433	-0.000188142	-0.299096	0.121499	0.830177	0.570432	-0.36028	0.212995	0.718653	0.831331	0.933064	0.999878
AMBRA1	3371544	ILMN_1662681	1110129	0.00131011	2.84277	-0.815996	0.985666	0.456958	2.88411	-1.78571	0.00394189	0.0741457	0.112361	0.999878
AMD1	2921296	ILMN_1667994	3870619	0.000275181	-0.954878	-0.436592	0.643068	0.30497	-1.48488	-1.43159	0.137639	0.152261	0.559913	0.999878
AMDHD1	3427032	ILMN_1788239	6520112	-0.000132186	-0.494756	-0.52225	0.719951	0.506109	-0.687208	-1.03189	0.491983	0.302122	0.84631	0.999878
AMDHD2	3644932	ILMN_1695759	6110280	0.00173824	-3.19022	-0.294706	0.986521	0.351939	-3.23381	-0.837378	0.00122938	0.40238	0.0597341	0.999878
AMELX	3968748	ILMN_2397406	5720730	5.45e-06	0.584747	-0.296327	0.45222	0.462691	1.29306	-0.640443	0.196051	0.521885	0.646428	0.999878
AMELY	4033748	ILMN_1727258	7040402	0.000394873	-0.773773	0.260312	0.455417	0.519476	-1.69904	0.501104	0.089373	0.616298	0.480779	0.999878
AMER2	3506093	ILMN_2394366	4850274	-0.000199984	0.544528	0.431967	0.810683	0.418844	0.67169	1.03133	0.501812	0.302385	0.852506	0.999878
AMFR	3692856	ILMN_1723116	1400672	0.000214507	0.755046	-0.0174107	0.603332	0.153817	1.25146	-0.113191	0.210824	0.909879	0.660319	0.999878
AMIGO3	2674646	ILMN_1738233	3060349	0.000137025	-0.484941	-0.169146	0.574164	0.500005	-0.844604	-0.338289	0.398372	0.735145	0.799599	0.999878
AMMECR1	4017961	ILMN_2394242	7100093	-5.23e-06	-0.915315	-0.680009	0.861816	0.416361	-1.06208	-1.63322	0.288251	0.102423	0.722899	0.999878
AMMECR1L	2575161	ILMN_1727023	4900605	0.000751173	1.49113	0.102312	0.635483	0.426938	2.34645	0.239643	0.0189916	0.810607	0.24704	0.999878
AMN1	3449910	ILMN_1750880	6900044	0.000617713	-0.938561	0.16476	0.501134	0.42486	-1.87287	0.387799	0.0611437	0.698165	0.416732	0.999878
AMPD1	2429235	ILMN_1759312	6660114	-0.000152859	0.836426	-0.237418	0.834485	0.591759	1.00233	-0.401208	0.316234	0.688267	0.743041	0.999878
AMTN	2730465	ILMN_1713927	7320450	-0.000198268	0.000453769	-0.112946	0.361434	0.58886	0.00125547	-0.191804	0.998998	0.847896	0.99956	0.999878
AMY2B	2349402	ILMN_2073157	7000754	0.000907359	-0.81127	-0.179568	0.332823	0.333099	-2.43754	-0.539082	0.0148219	0.58983	0.217544	0.999878
AMZ2P1	3767280	ILMN_1756918	5820286	-0.00011457	0.26469	0.496213	0.467847	0.515138	0.565763	0.963263	0.57158	0.335416	0.88128	0.999878
ANAPC10	2788143	ILMN_1770378	6840706	-0.000138424	-0.114006	-0.435514	0.288195	0.398267	-0.395587	-1.09352	0.692426	0.274165	0.925472	0.999878
ANAPC11	3738280	ILMN_1722102	4760288	-0.000197754	-0.0574727	0.612633	0.246311	0.3239	-0.233334	1.89143	0.815511	0.0585676	0.958648	0.999878
ANAPC13	2696379	ILMN_1793894	6250382	0.000837275	-0.87796	-0.0287104	0.40401	0.198627	-2.17312	-0.144544	0.0298181	0.885071	0.303726	0.999878
ANAPC15	3380996	ILMN_1726104	6840100	0.000150459	-0.675894	-0.0463726	0.516723	0.393729	-1.30804	-0.117778	0.19092	0.906244	0.639405	0.999878
ANAPC16	3251353	ILMN_1738955	7210300	0.00107037	1.62594	-0.0400104	0.572252	0.31099	2.8413	-0.128655	0.00451111	0.897631	0.121337	0.999878
ANAPC2	3230894	ILMN_1813243	4180634	0.00119392	-1.21616	-0.049658	0.449037	0.455325	-2.70837	-0.10906	0.00678434	0.913155	0.152237	0.999878
ANAPC4	2721848	ILMN_1802973	6450021	0.00103331	-1.07497	-0.0803163	0.413083	0.277551	-2.6023	-0.289375	0.0092872	0.772295	0.176237	0.999878
ANGEL1	3572782	ILMN_1665871	5550086	-0.000199594	-0.318495	0.130074	0.802224	0.422714	-0.397016	0.307712	0.691373	0.758302	0.925363	0.999878
ANGEL2	2454935	ILMN_1736340	1820441	0.000643625	-1.24091	-0.284747	0.661939	0.286726	-1.87467	-0.993097	0.0608964	0.320663	0.416732	0.999878
ANGPT4	3894413	ILMN_1758443	6040343	0.000830629	-2.03995	0.0422006	0.83907	0.596033	-2.43121	0.0708025	0.0150832	0.943555	0.218699	0.999878
ANGPTL1	2445982	ILMN_2145501	2030450	0.00201103	-1.12108	0.650091	0.355913	0.594509	-3.14986	1.09349	0.00164302	0.274177	0.0678028	0.999878
ANGPTL2	3225855	ILMN_1772612	7650672	0.000263115	-0.892258	0.626409	0.622178	0.571327	-1.43409	1.09641	0.151609	0.272899	0.584418	0.999878
ANGPTL3	2339454	ILMN_2143220	6770427	-3.35e-05	-0.367127	-0.468873	0.630597	0.424172	-0.582189	-1.10538	0.560466	0.268993	0.877127	0.999878
ANGPTL4	3819474	ILMN_1707727	4610433	-0.00019766	0.201349	-0.714638	0.945971	0.529148	0.212849	-1.35054	0.831453	0.176841	0.963363	0.999878
ANGPTL5	3388517	ILMN_2166696	2360066	0.000342792	1.06526	-0.173079	0.766531	0.472086	1.38972	-0.366626	0.164676	0.713898	0.603145	0.999878
ANGPTL6	3850020	ILMN_1725518	5050707	-0.000186134	-0.224204	-0.0341631	0.836787	0.475456	-0.267935	-0.0718534	0.788761	0.942719	0.94898	0.999878
ANGPTL7	2320188	ILMN_1813361	2640348	0.000811501	1.18654	0.176968	0.506077	0.619887	2.34459	0.285485	0.0190867	0.775273	0.24704	0.999878
ANK1	3132940	ILMN_2317186	2900402	0.00266718	1.30327	0.495331	0.374099	0.600173	3.48375	0.825313	0.00049864	0.409194	0.039272	0.999878
ANKDD1A	3598199	ILMN_1813139	5890564	-0.000158244	-0.421013	0.102034	0.77396	0.159254	-0.543973	0.640701	0.586484	0.521717	0.887656	0.999878
ANKEF1	3876142	ILMN_1793466	1740546	0.000217184	0.885182	0.116398	0.484778	0.434761	1.82595	0.267729	0.0679163	0.788908	0.430977	0.999878
ANKFN1	3727787	ILMN_1811239	6590152	0.000330465	-1.71158	0.364843	0.841208	0.542229	-2.03467	0.672857	0.041936	0.501038	0.351715	0.999878
ANKH	2849469	ILMN_1692080	5130274	0.00122699	1.06553	0.42215	0.419415	0.40784	2.54051	1.03509	0.0110989	0.300628	0.189169	0.999878
ANKK1	3349535	ILMN_1797873	780338	-3.19e-05	-0.781567	0.352955	0.836222	0.527359	-0.934641	0.669288	0.350018	0.503312	0.765784	0.999878
ANKMY2	3039731	ILMN_1784292	4890136	-4.24e-05	-0.377571	-0.510388	0.560432	0.359077	-0.673714	-1.42139	0.500524	0.155204	0.85188	0.999878
ANKRA2	2862380	ILMN_2185563	7400114	5.19e-06	0.858573	-0.214007	0.576595	0.317904	1.48904	-0.67318	0.136539	0.500833	0.559753	0.999878
ANKRD1	3299970	ILMN_1716264	6560112	2.89e-05	-0.619429	-0.0587657	0.60451	0.401866	-1.02468	-0.146232	0.305564	0.883738	0.733886	0.999878
ANKRD13A	3431376	ILMN_1689908	2120224	-0.000189158	0.738842	-0.0463356	0.748578	0.230264	0.986995	-0.201228	0.323692	0.84052	0.748982	0.999878
ANKRD13B	3716151	ILMN_1794070	5910273	5.53e-05	-1.00245	0.452998	1.05459	0.456741	-0.950558	0.991805	0.341874	0.321293	0.761918	0.999878
ANKRD13D	3336857	ILMN_1662902	4060451	-7.17e-05	-0.692619	-0.0567672	0.819713	0.579309	-0.844953	-0.0979912	0.398177	0.921939	0.799599	0.999878
ANKRD16	3275611	ILMN_2353431	3450274	-2.9e-05	0.439516	0.347502	0.555003	0.441896	0.791915	0.786389	0.428447	0.431639	0.819161	0.999878
ANKRD18DP	2713709	ILMN_1681751	6040619	-0.000177159	0.163511	0.0585507	0.443027	0.51669	0.369077	0.113319	0.712086	0.909778	0.931261	0.999878
ANKRD2	3259920	ILMN_1682547	840333	0.000251429	-1.8798	0.500899	1.02305	0.435298	-1.83746	1.1507	0.0662013	0.249854	0.428858	0.999878
ANKRD20A11P	3925295	ILMN_1767805	290762	-0.000192141	0.0254766	0.200162	0.27422	0.279023	0.092906	0.717366	0.925982	0.473148	0.98552	0.999878
ANKRD22	3299469	ILMN_1799848	130181	-0.000151002	0.105341	-0.0658247	0.205169	0.236561	0.513438	-0.278257	0.607668	0.780815	0.895239	0.999878
ANKRD23	2565559	ILMN_1747151	3520195	4.46e-05	-0.891669	0.377984	0.862691	0.416817	-1.03359	0.906833	0.301377	0.364495	0.731548	0.999878
ANKRD26	3282117	ILMN_1740161	5720162	-0.000214032	-0.351185	-0.336982	0.542902	0.519258	-0.646867	-0.648969	0.517747	0.516358	0.860594	0.999878
ANKRD26P1	3689827	ILMN_1741157	2350682	-7.63e-05	-0.920437	-0.153101	1.01773	0.612533	-0.904404	-0.249947	0.365825	0.802628	0.777687	0.999878
ANKRD27	3858659	ILMN_1794063	5670112	0.00015316	0.416709	0.0142031	0.419295	0.388996	0.993832	0.0365122	0.320352	0.970874	0.746662	0.999878
ANKRD29	3801492	ILMN_2075643	1500358	-0.000205856	-0.073787	-0.361847	0.824033	0.562502	-0.0895438	-0.643282	0.928653	0.520041	0.986364	0.999878
ANKRD30A	3242839	ILMN_1813607	4900215	-0.000163628	0.52618	0.277116	0.624491	0.573989	0.842573	0.482789	0.399507	0.629246	0.800627	0.999878
ANKRD30BL	2576788	ILMN_1749341	840762	-9.17e-05	-0.188801	0.055854	0.210462	0.44393	-0.897078	0.125817	0.36972	0.899877	0.780097	0.999878
ANKRD32	2820622	ILMN_2214278	1070736	-0.000162513	-0.132247	-0.0681657	0.440253	0.348033	-0.300389	-0.19586	0.763893	0.84472	0.944376	0.999878
ANKRD35	2356273	ILMN_2145153	4180437	-0.000136148	-0.30117	0.608622	0.892318	0.276268	-0.337514	2.20301	0.735744	0.0275941	0.938309	0.999878
ANKRD36B	2565935	ILMN_1780806	3060010	-0.000136194	-0.0963988	-0.0535977	0.108174	0.249746	-0.891143	-0.214608	0.372895	0.830073	0.782219	0.999878
ANKRD37	2754673	ILMN_1756417	240682	-0.000197591	0.102479	-0.650225	0.60173	0.536219	0.170307	-1.21261	0.864775	0.225279	0.969711	0.999878
ANKRD39	2565579	ILMN_1710979	6220553	0.000283873	0.900967	0.438038	0.653489	0.444136	1.3787	0.986269	0.168048	0.324001	0.607721	0.999878
ANKRD42	3342569	ILMN_1676605	2120392	0.000583836	-0.469814	0.337296	0.218149	0.546709	-2.15364	0.616957	0.0313157	0.537263	0.309868	0.999878
ANKRD45	2444415	ILMN_1733716	7610066	0.000574704	-1.0131	-0.150431	0.463128	0.475044	-2.18751	-0.316666	0.0287511	0.751497	0.300975	0.999878
ANKRD49	3345107	ILMN_1669259	520341	-1.88e-05	-0.293709	-0.246644	0.337456	0.242339	-0.870363	-1.01776	0.384144	0.30879	0.790942	0.999878
ANKRD50	2784687	ILMN_2226304	1770187	0.000126978	0.4741	-0.128777	0.326936	0.483038	1.45013	-0.266597	0.147084	0.789779	0.573929	0.999878
ANKRD53	2487963	ILMN_1772660	150097	-0.000207652	-0.322996	-0.338602	1.02254	0.485184	-0.315877	-0.697883	0.752109	0.48525	0.941402	0.999878
ANKRD54	3960246	ILMN_1766309	2340598	-0.000203428	-0.0916219	0.244746	0.953043	0.516642	-0.0961362	0.473724	0.923416	0.635697	0.984457	0.999878
ANKRD55	2857488	ILMN_2341724	4050600	0.000487268	0.644194	-0.135158	0.316238	0.232361	2.03705	-0.581673	0.0416969	0.560787	0.350718	0.999878
ANKRD6	2916825	ILMN_1698159	2030014	-0.000192796	-0.0738827	-0.330005	0.862411	0.519897	-0.08567	-0.634751	0.931732	0.525591	0.987141	0.999878
ANKRD7	3020843	ILMN_1779951	4260653	-0.000177123	-0.150052	-0.139577	0.656801	0.597516	-0.228458	-0.233596	0.819299	0.815299	0.959429	0.999878
ANKS1A	2904329	ILMN_1813669	5390064	-5.42e-05	0.891038	-0.00104964	0.92649	0.397585	0.961735	-0.00264005	0.336229	0.997894	0.760641	0.999878
ANKS4B	3651672	ILMN_2199658	1110382	2.81e-05	0.438488	-0.0468974	0.478529	0.437632	0.916325	-0.107162	0.35954	0.914661	0.771862	0.999878
ANKS6	3217395	ILMN_1802231	6980563	-0.000101325	0.277754	0.358478	0.567467	0.429714	0.489463	0.834226	0.624535	0.404154	0.904012	0.999878
ANLN	2997376	ILMN_1739645	6450669	0.000527325	1.23107	0.288147	0.647233	0.57484	1.90205	0.501265	0.0572214	0.616184	0.406077	0.999878
ANO10	2671101	ILMN_1767111	7040554	0.000303601	0.671767	0.108985	0.47193	0.469929	1.42345	0.231919	0.154669	0.816601	0.589339	0.999878
ANO2	3441542	ILMN_1699121	50176	-0.000124349	-0.391852	-0.0782052	1.07754	0.579321	-0.363655	-0.134995	0.716131	0.892616	0.932844	0.999878
ANO3	3324321	ILMN_2049672	4900768	-8.26e-06	-1.20818	0.535439	1.15625	0.531573	-1.04491	1.00727	0.296113	0.313804	0.729057	0.999878
ANO4	3428333	ILMN_1745134	1240609	-0.000183952	0.122651	0.855358	1.06037	0.459094	0.115668	1.86315	0.90792	0.0624418	0.980835	0.999878
ANO5	3323748	ILMN_1690154	1450593	-0.000197774	-0.0177611	0.0983772	0.672975	0.574136	-0.0263919	0.171348	0.978946	0.86395	0.9974	0.999878
ANO7	2536217	ILMN_1675423	2470204	-8.78e-05	-0.767113	0.154902	1.39836	0.472979	-0.548581	0.327502	0.583317	0.743288	0.886033	0.999878
ANP32A	3630912	ILMN_1807945	1240424	-0.000170529	-0.0975464	-0.444737	0.378018	0.213344	-0.258047	-2.0846	0.796381	0.0371058	0.9522	0.999878
ANP32A-IT1	3630957	ILMN_1686662	1980259	0.00195334	-2.26389	0.156817	0.625532	0.262966	-3.61914	0.596339	0.000298481	0.550948	0.0280992	0.999878
ANP32B	3181417	ILMN_1684293	3850053	0.00239172	1.44501	0.212211	0.404017	0.184622	3.57662	1.14943	0.000351337	0.250378	0.0315067	0.999878
ANP32C	2792305	ILMN_2151412	1230725	-0.000163397	0.235203	-0.23717	0.374827	0.541587	0.627498	-0.437917	0.530362	0.661447	0.866909	0.999878
ANP32D	3413479	ILMN_1728191	4850114	-0.000193592	0.00690694	0.19751	0.189033	0.466622	0.0365383	0.423277	0.970855	0.672093	0.995497	0.999878
ANPEP	3638607	ILMN_1763837	5810612	-0.000227066	-0.148878	0.0432978	0.399122	0.13565	-0.373013	0.319188	0.709155	0.749584	0.930051	0.999878
ANTXR1	2487082	ILMN_2387995	3120689	-4.69e-05	-0.741992	0.184502	1.01872	0.484378	-0.728359	0.380906	0.466428	0.703273	0.835669	0.999878
ANXA1	3174816	ILMN_2184184	6520215	0.00173693	1.50739	0.0946663	0.437403	0.0957534	3.44624	0.988647	0.0005731	0.322836	0.041302	0.999878
ANXA10	2751009	ILMN_1699421	1050242	0.000253159	1.01621	0.0776858	0.67263	0.474167	1.5108	0.163836	0.130903	0.86986	0.551661	0.999878
ANXA11	3297536	ILMN_1807003	6960594	0.000101599	0.945521	0.155004	0.915483	0.294042	1.03281	0.527149	0.301742	0.59809	0.731548	0.999878
ANXA13	3151719	ILMN_1799243	6450725	-2.5e-05	-0.578667	-0.782613	0.800441	0.595528	-0.722935	-1.31415	0.469754	0.188796	0.837036	0.999878
ANXA2	3627248	ILMN_1755937	3520328	0.00034955	-0.827893	-0.389384	0.522077	0.490165	-1.58577	-0.794395	0.112855	0.426965	0.525071	0.999878
ANXA2P1	2790109	ILMN_1698100	270609	5.89e-05	-0.551887	-0.445406	0.478697	0.218804	-1.15289	-2.03563	0.249009	0.0417871	0.695377	0.999878
ANXA2P3	3249171	ILMN_1798372	2810411	-0.000235164	-0.185163	0.0720935	0.35648	0.437474	-0.519419	0.164795	0.603491	0.869106	0.893755	0.999878
ANXA2R	2855434	ILMN_2098616	7330523	-0.000131371	0.184526	-0.0607997	0.437742	0.252239	0.42154	-0.24104	0.673379	0.809524	0.920568	0.999878
ANXA5	2784027	ILMN_1741003	1070451	0.00160117	-1.33849	0.0494118	0.527909	0.144119	-2.53546	0.342853	0.01126	0.731709	0.190834	0.999878
ANXA6	2881747	ILMN_1678612	2490598	0.00028158	0.862884	0.24254	0.561338	0.393884	1.53719	0.615765	0.124309	0.53805	0.542836	0.999878
ANXA7	3294438	ILMN_1703791	6330044	-0.000170178	-0.196934	-0.268928	0.681184	0.225043	-0.289105	-1.19501	0.772513	0.232084	0.946346	0.999878
ANXA9	2358591	ILMN_1755721	2000324	-6.32e-05	0.669985	0.101844	0.874363	0.413355	0.766255	0.246383	0.443561	0.805385	0.82653	0.999878
AOAH	3046062	ILMN_1709820	2940424	2.7e-05	0.638385	0.319427	0.495983	0.23466	1.28711	1.36123	0.198115	0.17344	0.647137	0.999878
AOC1	3031650	ILMN_1731433	5420440	-0.000209428	0.0515238	-0.0584998	0.601695	0.41498	0.0856312	-0.14097	0.931763	0.887894	0.987141	0.999878
AOC2	3722182	ILMN_2405185	4290180	-0.000106503	-0.513436	0.485543	0.50217	0.50422	-1.02244	0.962958	0.306624	0.335569	0.735134	0.999878
AOC3	3722195	ILMN_1782086	6860309	0.000198117	-0.748632	0.305606	0.474621	0.387009	-1.57733	0.789663	0.114783	0.429725	0.528819	0.999878
AOX1	2522247	ILMN_1767113	3780095	7.24e-05	-1.15252	-0.518397	1.23489	0.570988	-0.933294	-0.907895	0.350713	0.363934	0.765784	0.999878
AP1AR	2739755	ILMN_2207562	1450239	-1.64e-05	-0.476046	-0.650439	0.545586	0.474236	-0.87254	-1.37155	0.382955	0.170204	0.789902	0.999878
AP1B1	3956781	ILMN_1781983	5960201	0.000115938	1.19184	0.402743	0.820625	0.37022	1.45236	1.08785	0.146465	0.276662	0.57357	0.999878
AP1G2	3557614	ILMN_2276598	3130215	0.000407968	1.20024	0.333667	0.776818	0.55715	1.54507	0.598881	0.122392	0.549252	0.541779	0.999878
AP1M1	3823625	ILMN_1754738	2190241	-0.000197643	-0.0386457	-0.114893	0.813416	0.199257	-0.0475104	-0.576611	0.962108	0.564203	0.993051	0.999878
AP1M2	3850457	ILMN_1705861	1170041	0.000143527	-0.939673	0.152051	0.825573	0.526718	-1.13821	0.288676	0.255088	0.772829	0.698802	0.999878
AP1S1	3016177	ILMN_2316173	7040079	0.000175715	-0.752212	-0.116268	0.652348	0.440097	-1.15308	-0.264187	0.248931	0.791636	0.695322	0.999878
AP1S3	2601287	ILMN_1768610	4480491	8.02e-05	0.784755	-0.274148	0.444696	0.431835	1.7647	-0.634845	0.0776749	0.52553	0.455023	0.999878
AP2B1	3718682	ILMN_2331735	2340451	0.00339816	2.21901	0.353671	0.552038	0.311397	4.01967	1.13576	5.91e-05	0.256059	0.0106796	0.999878
AP2S1	3866302	ILMN_1662426	3120228	0.000857283	1.40652	0.150336	0.578358	0.178162	2.43192	0.843817	0.0150537	0.398772	0.218582	0.999878
AP3B1	2863730	ILMN_1768867	2230603	-0.000185944	0.23973	-0.110159	0.7623	0.245774	0.314482	-0.448212	0.753168	0.654	0.941437	0.999878
AP3B2	3636216	ILMN_1679256	4230360	8.16e-05	-1.09817	-0.730615	0.924886	0.448028	-1.18735	-1.63074	0.235144	0.102946	0.683244	0.999878
AP3D1	3845708	ILMN_2284667	1050053	0.000219045	-1.86607	-0.104132	1.16545	0.581185	-1.60116	-0.179171	0.109404	0.857803	0.520662	0.999878
AP3M1	3295032	ILMN_1667086	6200437	-0.000203736	-0.377836	-0.304831	0.704015	0.407786	-0.536687	-0.747528	0.591508	0.454745	0.889735	0.999878
AP3S1	2824872	ILMN_2311761	7200402	0.000962002	-1.31371	0.00741449	0.570364	0.321714	-2.30328	0.0230468	0.0213037	0.981613	0.261415	0.999878
AP4M1	3015241	ILMN_1779512	2750168	-0.0001319	-0.375078	-0.51714	1.03111	0.553631	-0.363763	-0.934088	0.716051	0.350259	0.932844	0.999878
AP5M1	3537557	ILMN_2204297	4670743	0.000167711	-0.926931	-0.185703	0.612652	0.361605	-1.51298	-0.513552	0.130347	0.607566	0.551158	0.999878
AP5S1	3874485	ILMN_1785644	3940059	-0.00019819	-0.0234767	0.26422	0.593126	0.376919	-0.0395813	0.700998	0.968428	0.483304	0.995085	0.999878
AP5Z1	2988336	ILMN_2083559	1570685	0.000204559	-1.4432	-0.381146	1.09968	0.467646	-1.31239	-0.81503	0.18945	0.415055	0.638757	0.999878
APAF1	3427876	ILMN_1659463	1820324	-0.000215167	-0.370815	-0.386829	0.686292	0.192479	-0.540316	-2.00972	0.589003	0.0444608	0.887963	0.999878
APBA1	3208765	ILMN_1668285	520372	7.84e-05	-0.900749	0.141085	0.938741	0.49614	-0.959529	0.284365	0.337338	0.776131	0.760641	0.999878
APBA3	3846363	ILMN_1686610	4070014	-0.000172673	-0.317366	0.0611693	0.966506	0.288839	-0.328364	0.211776	0.74265	0.832282	0.939422	0.999878
APBB1IP	3239760	ILMN_1801710	1820722	-0.000189519	0.558267	0.0138639	0.600314	0.144095	0.929958	0.0962141	0.352437	0.923351	0.766445	0.999878
APC	2824198	ILMN_1662668	5720722	-1.49e-05	-0.786458	0.603062	0.702123	0.449232	-1.12011	1.34243	0.262719	0.179457	0.70368	0.999878
APC2	3815888	ILMN_1659950	4180358	-0.000128912	-0.551396	0.641096	1.31467	0.536937	-0.419418	1.19399	0.674929	0.232483	0.920739	0.999878
APCDD1L	3911485	ILMN_1689431	130138	-0.000179108	0.266368	0.678331	0.878188	0.536704	0.303316	1.26388	0.761662	0.206272	0.943968	0.999878
APCS	2362651	ILMN_1708833	3460279	-0.000175991	0.183014	0.0337518	0.498807	0.634096	0.366905	0.0532282	0.713705	0.95755	0.931848	0.999878
APEH	2622196	ILMN_1718023	450475	-0.000186321	-0.374966	0.0770039	0.695504	0.336864	-0.539129	0.22859	0.589822	0.819187	0.888329	0.999878
APEX1	3527493	ILMN_2319344	3120309	0.000245064	-0.777212	0.173195	0.585439	0.27719	-1.32757	0.624825	0.18438	0.532086	0.633668	0.999878
APEX2	3978620	ILMN_1652505	1430047	-1.49e-05	0.55261	-0.119954	0.733207	0.366416	0.753689	-0.32737	0.451071	0.743388	0.830594	0.999878
APH1A	2434341	ILMN_2398388	7550364	0.000866514	-1.21942	-0.403273	0.558094	0.270373	-2.18497	-1.49154	0.0289368	0.135819	0.301505	0.999878
APH1B	3597521	ILMN_1767816	7160224	-0.00021822	0.156766	-0.305192	0.459736	0.289597	0.340992	-1.05385	0.733123	0.291951	0.938006	0.999878
API5	3327906	ILMN_1815051	7050523	0.000679088	1.18846	-0.293812	0.487441	0.299196	2.43817	-0.982007	0.0147963	0.326096	0.217433	0.999878
APIP	3369249	ILMN_2128293	7380010	-0.000197163	-0.0588988	-0.235715	0.178527	0.411319	-0.329915	-0.573071	0.741478	0.566597	0.939241	0.999878
APLNR	3373630	ILMN_1700183	3290402	-5.55e-05	-0.569195	-0.0559001	0.568321	0.469673	-1.00154	-0.119019	0.316615	0.90526	0.743308	0.999878
APLP1	3830961	ILMN_1763834	7000008	-0.000173211	-0.214655	-0.704585	1.05191	0.46041	-0.204063	-1.53034	0.838313	0.125932	0.964766	0.999878
APLP2	3356115	ILMN_1710482	3450577	-0.000198682	0.0109054	0.0900825	0.660663	0.249429	0.0165068	0.361155	0.986831	0.717984	0.997902	0.999878
APMAP	3901665	ILMN_1674394	4040204	0.000317736	1.04016	0.0705515	0.531741	0.196149	1.95613	0.359683	0.0505051	0.719084	0.384992	0.999878
APOA1	3392986	ILMN_1690884	4570364	-6.69e-05	-0.424544	-0.0961187	0.688157	0.402762	-0.616929	-0.238649	0.537309	0.811378	0.869071	0.999878
APOA1BP	2361584	ILMN_1729533	1570725	-0.000172667	0.228173	0.0494361	0.504839	0.314583	0.451972	0.157148	0.651309	0.875128	0.91211	0.999878
APOA2	2440730	ILMN_1688543	6380020	8.72e-05	-0.541901	0.576025	0.47424	0.508105	-1.14267	1.13367	0.253229	0.256932	0.698802	0.999878
APOA4	3392973	ILMN_1675706	3780468	0.000150604	-0.597474	-0.315961	0.503007	0.482418	-1.18781	-0.654953	0.234966	0.512498	0.683244	0.999878
APOA5	3392957	ILMN_1754055	1470600	-0.000195743	0.0255799	-0.456206	0.750022	0.491483	0.0341055	-0.928223	0.972794	0.353292	0.995747	0.999878
APOB	2543163	ILMN_1664024	240541	1.58e-05	1.32136	-0.371776	1.13757	0.58756	1.16156	-0.632747	0.245469	0.526899	0.692581	0.999878
APOBEC1	3442752	ILMN_1813881	990438	-5.56e-05	-0.506873	0.0302791	0.578043	0.580599	-0.876877	0.0521515	0.380595	0.958408	0.787788	0.999878
APOBEC2	2906591	ILMN_1719143	3890743	-0.000153045	0.189203	0.314876	0.349063	0.577697	0.542032	0.545053	0.587821	0.585717	0.887656	0.999878
APOBEC3C	3945572	ILMN_1675684	3120221	0.000835438	0.891439	0.0543247	0.39705	0.3378	2.24516	0.160819	0.0248013	0.872236	0.282472	0.999878
APOBEC3D	3945585	ILMN_1661572	6350402	8.33e-05	0.795181	-0.103402	0.633855	0.485125	1.25452	-0.213145	0.209713	0.831214	0.659514	0.999878
APOBEC3F	3945614	ILMN_2296950	1410279	0.000425157	0.61095	-0.542652	0.416955	0.315386	1.46526	-1.7206	0.142911	0.0853241	0.568531	0.999878
APOBEC3G	3945651	ILMN_1802106	1190026	7.59e-05	0.582079	0.0791996	0.435068	0.17425	1.3379	0.454517	0.180988	0.649457	0.627237	0.999878
APOBEC3H	3945684	ILMN_1664828	160292	0.000618106	0.660758	0.238321	0.316503	0.367786	2.08768	0.64799	0.0368768	0.516992	0.333973	0.999878
APOC1	3835891	ILMN_1789007	3830465	-0.000105133	-0.223196	-0.223506	0.318863	0.447129	-0.699974	-0.49987	0.483976	0.617167	0.842548	0.999878
APOC3	3350655	ILMN_1722070	2630010	-2.45e-05	-0.309563	-0.334986	0.592633	0.488362	-0.522351	-0.685938	0.601449	0.492752	0.893314	0.999878
APOC4	3835911	ILMN_1765605	3440717	-0.000148661	0.427356	0.145549	0.648645	0.493223	0.658844	0.295098	0.510026	0.767919	0.8575	0.999878
APOD	4054204	ILMN_1780170	7150634	-0.000194368	0.16611	-0.0197562	0.308025	0.181703	0.539276	-0.108729	0.58972	0.913418	0.888329	0.999878
APOE	3835879	ILMN_1740938	730414	-0.000185288	-0.568277	0.299319	0.836324	0.596089	-0.679494	0.502138	0.496856	0.615571	0.849215	0.999878
APOF	3457794	ILMN_1809311	130400	-0.000199115	-0.0066994	0.314208	0.402595	0.558696	-0.0166405	0.562394	0.986724	0.573847	0.997902	0.999878
APOH	3767709	ILMN_1761511	1740669	-0.000117059	0.542912	-1.07603	0.609583	0.591954	0.890629	-1.81776	0.373171	0.0691013	0.782219	0.999878
APOL1	3944404	ILMN_1761793	4040386	-0.000201841	-0.146472	-0.0123589	0.405518	0.46861	-0.361198	-0.0263736	0.717967	0.978959	0.932877	0.999878
APOL2	3959411	ILMN_1706582	4040270	0.000187195	-0.861054	-0.0741877	0.577079	0.56783	-1.49209	-0.130651	0.135738	0.896051	0.559224	0.999878
APOL4	3959388	ILMN_1779070	3400142	8.5e-05	-0.570234	0.0451285	0.672783	0.501722	-0.847575	0.0899471	0.396715	0.928329	0.798692	0.999878
APOL5	3944273	ILMN_1676177	6450301	-0.000170923	-0.416414	-0.396455	0.591207	0.588632	-0.704345	-0.673519	0.48125	0.500617	0.841386	0.999878
APOL6	3944243	ILMN_1687201	5550397	-0.000201869	-0.0946388	-0.404967	0.334641	0.447004	-0.282807	-0.905959	0.777336	0.364957	0.946917	0.999878
APOLD1	3405515	ILMN_1723522	1770364	-2.75e-05	-0.433934	-0.177407	0.335092	0.424572	-1.29497	-0.417848	0.19539	0.676058	0.645585	0.999878
APOOL	3983105	ILMN_1777483	4250270	4.13e-05	-0.375673	-0.169991	0.417595	0.40353	-0.899612	-0.42126	0.36837	0.673565	0.779246	0.999878
APPBP2	3765299	ILMN_1694875	1440707	-0.000177451	0.219154	0.286715	0.745793	0.513977	0.293854	0.557837	0.768881	0.576955	0.945095	0.999878
APPL1	2625606	ILMN_1763730	5860554	0.000253857	-0.828898	0.252309	0.687818	0.385746	-1.20511	0.654082	0.228217	0.513059	0.676466	0.999878
APRT	3704495	ILMN_1726410	6510603	-0.000247484	-0.281906	-0.134797	0.701258	0.263569	-0.402	-0.51143	0.687701	0.60905	0.923533	0.999878
AQP1	2995589	ILMN_1776857	70338	-0.000122814	-0.449073	-0.563303	0.596448	0.468413	-0.752912	-1.20258	0.451538	0.22914	0.831138	0.999878
AQP10	2360186	ILMN_2090004	2340577	-0.000166601	0.391425	0.243041	0.677736	0.172738	0.577548	1.40699	0.563595	0.159432	0.878117	0.999878
AQP11	3341362	ILMN_1762606	4210072	0.000189781	0.851092	-0.157466	0.554265	0.562313	1.53553	-0.280032	0.124716	0.779453	0.542836	0.999878
AQP2	3414296	ILMN_1732149	4480079	-0.00018939	0.131422	-0.221722	0.790001	0.394283	0.166357	-0.562342	0.867883	0.573883	0.971061	0.999878
AQP3	3203569	ILMN_1651574	1050040	-0.000113035	-0.30862	-1.06165	0.671195	0.419986	-0.459807	-2.52783	0.645675	0.011477	0.911399	0.999878
AQP4	3802396	ILMN_1747683	2750176	-1.41e-05	-0.745831	-0.384541	0.759154	0.569905	-0.98245	-0.674746	0.325925	0.499837	0.751148	0.999878
AQP4-AS1	3782853	ILMN_1705656	2030647	-0.000198257	-0.000930239	0.363102	0.605378	0.505734	-0.00153662	0.71797	0.998774	0.472776	0.99956	0.999878
AQP5	3414315	ILMN_1807036	2810543	-2.35e-05	0.553111	-0.0342	0.768439	0.571456	0.719785	-0.0598471	0.471691	0.952277	0.837878	0.999878
AQP6	3414326	ILMN_1666519	6620347	-8.15e-05	-0.815924	0.220975	1.17284	0.469628	-0.695683	0.470532	0.486659	0.637975	0.842888	0.999878
AQP7	3203524	ILMN_1738494	5090209	-0.000191399	0.0431421	0.392539	0.424998	0.590106	0.101511	0.665201	0.919149	0.505922	0.983461	0.999878
AQP9	3595594	ILMN_1715068	160494	-0.000166897	-0.0914451	0.0417539	0.320862	0.127755	-0.284998	0.326828	0.775657	0.743798	0.946917	0.999878
AQPEP	2824902	ILMN_1810159	6400754	0.000735582	-2.31045	0.132656	1.11461	0.47295	-2.07288	0.280486	0.0382338	0.779105	0.336045	0.999878
AQR	3617757	ILMN_2177460	1070546	-0.000192461	-0.106223	-0.500084	0.870937	0.430004	-0.121964	-1.16297	0.902933	0.24484	0.979921	0.999878
ARAP1	3381241	ILMN_1786357	460747	0.00122171	-1.54956	-0.535314	0.63334	0.258497	-2.44665	-2.07087	0.0144529	0.0383708	0.215172	0.999878
ARAP2	2765590	ILMN_1767541	4760066	-2.93e-05	-0.677227	-0.18832	0.61187	0.400311	-1.10682	-0.470434	0.268427	0.638045	0.708466	0.999878
ARAP3	2878809	ILMN_1812618	7380255	0.00101253	-1.83288	0.121134	0.761553	0.176513	-2.40677	0.686259	0.0161301	0.49255	0.226277	0.999878
ARCN1	3351531	ILMN_1699703	2750653	0.000462048	1.24262	0.0729465	0.64457	0.221847	1.92783	0.328814	0.0539326	0.742296	0.397972	0.999878
AREG	2731542	ILMN_1804421	6520600	0.00119066	1.29581	0.598521	0.560347	0.574754	2.31252	1.04135	0.020789	0.297713	0.258522	0.999878
ARF3	3453370	ILMN_1682938	2680446	0.00149083	-2.05751	0.13293	0.71495	0.213939	-2.87783	0.621345	0.00402103	0.534372	0.11374	0.999878
ARF4	2678090	ILMN_1719518	6770176	-3.11e-05	0.372044	0.00142689	0.428798	0.26641	0.867643	0.00535597	0.385631	0.995727	0.791628	0.999878
ARFGAP3	3962587	ILMN_2227800	3850639	0.000438258	1.2667	-0.441232	0.561329	0.537329	2.25662	-0.821157	0.0240748	0.411557	0.277602	0.999878
ARFGEF1	3139035	ILMN_2221408	3710681	-0.000190854	0.102556	-0.516991	0.869484	0.294023	0.11795	-1.75833	0.906112	0.078691	0.98057	0.999878
ARFGEF2	3888055	ILMN_1789990	3610554	0.00037074	1.21782	0.375215	0.722177	0.524753	1.68632	0.715031	0.0917953	0.47459	0.485643	0.999878
ARFIP1	2747893	ILMN_2403911	2060630	0.00164417	-1.35678	0.154328	0.416736	0.437201	-3.25574	0.352991	0.00113844	0.724095	0.056922	0.999878
ARFIP2	3360941	ILMN_1750690	870082	0.00134572	1.74793	0.469106	0.710562	0.390838	2.45992	1.20026	0.0139301	0.23004	0.21406	0.999878
ARFRP1	3914072	ILMN_1703989	6110520	0.000142988	-1.27824	-0.517019	0.935546	0.514734	-1.36631	-1.00444	0.171904	0.315167	0.611225	0.999878
ARG1	2925841	ILMN_1812281	5270753	0.000403664	0.6511	0.448283	0.296977	0.256771	2.19243	1.74585	0.0283943	0.0808375	0.299869	0.999878
ARG2	3541383	ILMN_1800898	5720725	-3.02e-05	0.502829	0.613639	0.650408	0.558094	0.773098	1.09953	0.439501	0.271539	0.825053	0.999878
ARGLU1	3524618	ILMN_1788468	4880132	0.000743531	-1.46257	-0.0642909	0.698857	0.122815	-2.0928	-0.523476	0.0364171	0.600643	0.332266	0.999878
ARHGAP10	2746693	ILMN_1736112	2000669	-0.00019552	0.122742	-0.40773	0.624179	0.467319	0.196646	-0.872487	0.844112	0.382943	0.965684	0.999878
ARHGAP15	2508611	ILMN_2208413	1660685	0.00030958	-0.797807	-0.0565516	0.562937	0.190959	-1.41722	-0.296145	0.156479	0.76712	0.592018	0.999878
ARHGAP18	2973694	ILMN_1791186	3140445	0.000897368	0.978173	-0.754946	0.489787	0.465047	1.99714	-1.62338	0.0458636	0.104509	0.367214	0.999878
ARHGAP19	3302177	ILMN_1688953	6110332	2.57e-05	0.399641	-0.258609	0.342979	0.336058	1.1652	-0.769537	0.243991	0.441574	0.692111	0.999878
ARHGAP21	3281621	ILMN_1811592	1260543	-0.000147877	0.206994	0.220525	0.326785	0.344675	0.633425	0.639805	0.526485	0.522299	0.864721	0.999878
ARHGAP22	3288337	ILMN_1676361	510520	2.82e-05	0.987583	-0.619982	0.749458	0.532082	1.31773	-1.1652	0.187654	0.243938	0.63785	0.999878
ARHGAP26	2833286	ILMN_1711490	6350706	-0.000210937	0.107447	-0.0943378	0.56802	0.39643	0.189161	-0.237968	0.849974	0.811906	0.966675	0.999878
ARHGAP28	3777263	ILMN_1797753	4670753	-6.06e-05	0.669592	0.132866	0.83614	0.574183	0.800813	0.2314	0.423277	0.817004	0.815034	0.999878
ARHGAP29	2423829	ILMN_1751474	7000390	0.000801408	1.29348	0.0668975	0.726464	0.563088	1.78052	0.118805	0.0750511	0.90543	0.449039	0.999878
ARHGAP30	2440549	ILMN_2408851	4390441	-0.000130608	-0.572032	-0.0881597	0.873247	0.144884	-0.655063	-0.608484	0.512457	0.542867	0.857727	0.999878
ARHGAP35	3837001	ILMN_1658145	6280064	0.000393298	0.963217	0.353728	0.612175	0.396922	1.57343	0.891178	0.115681	0.372834	0.530845	0.999878
ARHGAP36	3990927	ILMN_1705466	2340491	-0.000196301	0.024622	-0.102969	0.976747	0.507604	0.0252081	-0.202852	0.97989	0.839251	0.9974	0.999878
ARHGAP44	3710870	ILMN_2065022	110575	-5.64e-05	-0.672689	0.163924	0.930456	0.461774	-0.722967	0.354988	0.469734	0.722599	0.837036	0.999878
ARHGAP5	3531479	ILMN_2322747	2570605	0.000754861	-1.16391	0.104496	0.54059	0.422731	-2.15304	0.247193	0.0313625	0.804758	0.309868	0.999878
ARHGDIA	3774283	ILMN_1734742	4760255	0.000464958	-0.449651	-0.182564	0.261329	0.207128	-1.72063	-0.881405	0.0853789	0.378099	0.469779	0.999878
ARHGDIB	3445786	ILMN_1678143	1570193	-0.000183144	0.610912	0.0538382	0.768694	0.23468	0.794739	0.229411	0.426803	0.81855	0.817253	0.999878
ARHGEF10	3082874	ILMN_2132809	6900703	0.000245118	1.57324	0.186062	0.938175	0.386903	1.67692	0.4809	0.0936204	0.630588	0.486841	0.999878
ARHGEF16	2317246	ILMN_1669928	1030753	-3.03e-05	-0.75676	0.715874	0.943609	0.482838	-0.801985	1.48264	0.422599	0.13817	0.814555	0.999878
ARHGEF19	2397999	ILMN_1808999	6250546	-0.000131264	0.620126	0.102059	1.00201	0.462794	0.618881	0.220529	0.536023	0.82546	0.868739	0.999878
ARHGEF26	2648535	ILMN_1773042	2480091	-0.000210022	0.160231	0.488941	0.919925	0.445449	0.174178	1.09764	0.861732	0.272364	0.968991	0.999878
ARHGEF37	2835166	ILMN_1795300	5900367	0.000114054	1.01157	-0.0980165	0.617931	0.392556	1.63703	-0.249688	0.101686	0.802829	0.504182	0.999878
ARHGEF38	2738244	ILMN_2179915	2710280	-7.43e-05	0.299004	0.244423	0.4713	0.428629	0.634423	0.570244	0.525834	0.568512	0.864669	0.999878
ARHGEF39	3204692	ILMN_1667405	4760482	0.00120593	2.25923	0.309039	0.97192	0.429272	2.3245	0.719915	0.0201383	0.471577	0.253041	0.999878
ARHGEF40	3527864	ILMN_1705743	7320274	-5.56e-05	1.30359	0.83584	0.949658	0.331602	1.37269	2.52061	0.169909	0.0117151	0.609905	0.999878
ARHGEF5	3029646	ILMN_1708093	4150356	0.000357583	0.727467	-0.62393	0.452311	0.578481	1.60833	-1.07856	0.107825	0.280782	0.518102	0.999878
ARHGEF6	4023467	ILMN_1803423	770703	-0.000198778	0.0353004	-0.0896554	0.656575	0.191065	0.0537644	-0.46924	0.957125	0.638898	0.992809	0.999878
ARID3A	3815278	ILMN_1670130	6510553	4.88e-05	-1.12977	0.0840847	1.00467	0.193064	-1.12453	0.435527	0.260844	0.66318	0.70368	0.999878
ARID3B	3601675	ILMN_1696956	5960670	0.000367993	0.841881	-0.107038	0.518596	0.334331	1.62338	-0.320156	0.10457	0.74885	0.510584	0.999878
ARID5A	2494579	ILMN_2298567	4850014	-0.00020706	0.0938428	0.368822	0.66593	0.460044	0.14092	0.801709	0.887939	0.422721	0.975569	0.999878
ARIH1	3600744	ILMN_1694219	6560433	0.000434592	1.41113	-0.0356784	0.858192	0.416293	1.64431	-0.0857052	0.100175	0.931701	0.499097	0.999878
ARIH2	2621827	ILMN_1792825	1010682	0.00510792	3.58061	0.421854	0.721575	0.319013	4.96222	1.32237	7.2e-07	0.186044	0.000542139	0.999878
ARL1	3468009	ILMN_1813091	4860468	-0.000114955	-0.258805	-0.111497	0.603536	0.410871	-0.428815	-0.271366	0.668076	0.786109	0.918252	0.999878
ARL10	2842530	ILMN_1769168	5270053	-0.000196403	0.0713488	0.315419	0.831387	0.618434	0.085819	0.510028	0.931614	0.610032	0.987141	0.999878
ARL13B	2632453	ILMN_2403047	4480722	-0.000184659	0.0941065	-0.711173	0.658118	0.450435	0.142993	-1.57886	0.886301	0.114369	0.975465	0.999878
ARL14	2650357	ILMN_2232463	3400209	-0.000112897	0.296247	-0.514077	0.479875	0.614137	0.617342	-0.837072	0.537037	0.402552	0.869071	0.999878
ARL14EP	3325052	ILMN_1767642	3840736	0.000133557	-0.818278	-0.206699	0.455349	0.302967	-1.79704	-0.68225	0.0723899	0.495081	0.44237	0.999878
ARL15	2856634	ILMN_1774161	2140605	0.000181637	-0.589305	0.325306	0.3648	0.422042	-1.61542	0.770791	0.106283	0.440831	0.515167	0.999878
ARL2BP	3662650	ILMN_1755391	2570523	0.000258819	0.642299	-0.212505	0.433536	0.284174	1.48154	-0.747801	0.138526	0.45458	0.560712	0.999878
ARL3	3304475	ILMN_1780444	7150671	0.000106557	-0.582128	-0.43658	0.5028	0.505085	-1.15777	-0.86437	0.247012	0.387385	0.694056	0.999878
ARL4A	2990464	ILMN_1775405	1410113	-0.000200554	-0.0215327	0.569671	0.375666	0.330898	-0.0573187	1.72159	0.954294	0.0851433	0.992083	0.999878
ARL4C	2604390	ILMN_1768391	1300192	0.0023616	2.08993	0.328529	0.626551	0.286168	3.33562	1.14803	0.000857267	0.250957	0.0499037	0.999878
ARL5B	3237548	ILMN_1680465	2340564	5.66e-05	-0.468553	0.134454	0.546183	0.429189	-0.857869	0.313275	0.391006	0.754072	0.79521	0.999878
ARL6	2632919	ILMN_2307266	1090482	-2.66e-05	0.493791	0.0203554	0.599096	0.565835	0.824228	0.0359742	0.409849	0.971303	0.80706	0.999878
ARL6IP1	3683037	ILMN_1708416	2690047	1.92e-06	0.358103	-0.0506887	0.425373	0.17346	0.841856	-0.292222	0.399908	0.770117	0.800644	0.999878
ARL6IP4	3435681	ILMN_1791149	2350192	-0.000158206	-0.357934	0.381539	0.712971	0.318001	-0.502032	1.1998	0.615667	0.230216	0.899126	0.999878
ARL6IP5	2628682	ILMN_1769810	2070563	-7.67e-05	0.549085	-0.0498231	0.733411	0.139246	0.748673	-0.357805	0.45409	0.720489	0.832714	0.999878
ARL6IP6	2510884	ILMN_2117902	7050438	0.00031094	-0.710479	-0.537267	0.459764	0.494635	-1.54531	-1.08619	0.122334	0.277396	0.541779	0.999878
ARL8B	2608765	ILMN_1752837	130685	0.000388637	0.982671	-0.371697	0.592369	0.308152	1.65888	-1.20621	0.0972015	0.227735	0.493147	0.999878
ARL9	2728271	ILMN_1777691	6350066	-0.000242252	0.159598	-0.163311	0.437349	0.58869	0.364921	-0.277414	0.715185	0.781462	0.932603	0.999878
ARMC1	3138414	ILMN_1722066	7570209	-0.000214269	-0.0701774	0.107609	0.491074	0.384804	-0.142906	0.279646	0.88637	0.779749	0.975465	0.999878
ARMC10	3017080	ILMN_1689296	2900372	0.000232347	-0.688792	-0.168734	0.53113	0.441908	-1.29684	-0.381831	0.194745	0.702587	0.644351	0.999878
ARMC12	2904788	ILMN_1712616	4220474	-0.000107165	0.511361	-0.14786	0.641636	0.466438	0.796965	-0.316998	0.425509	0.751245	0.817052	0.999878
ARMC2	2920619	ILMN_2213008	1710152	0.000481672	1.66987	-0.136013	0.641956	0.543946	2.60122	-0.25005	0.00931641	0.802549	0.176237	0.999878
ARMC7	3734683	ILMN_1797298	730020	0.000821169	1.45406	-0.0920124	0.635861	0.402767	2.28676	-0.22845	0.0222514	0.819296	0.265634	0.999878
ARMC9	2531779	ILMN_1755732	4880619	-0.000179799	-0.202496	0.13844	1.01102	0.531477	-0.200289	0.260481	0.841263	0.794493	0.965555	0.999878
ARNT2	3604006	ILMN_1718046	4180307	0.000311865	-1.94896	0.326213	1.19204	0.444338	-1.63498	0.734153	0.102116	0.462855	0.504922	0.999878
ARNTL2	3409127	ILMN_1798064	770523	7.78e-05	-0.783756	-0.00882803	0.758197	0.517332	-1.03371	-0.0170645	0.301322	0.986385	0.731548	0.999878
ARPC1A	3014671	ILMN_1759915	7610692	0.000707699	0.608929	-0.728033	0.308265	0.310009	1.97534	-2.34843	0.0482839	0.0188529	0.378543	0.999878
ARPC2	2527606	ILMN_1792489	7160327	-5.9e-05	-0.864529	0.220612	0.906316	0.211109	-0.953893	1.04502	0.340183	0.296016	0.761547	0.999878
ARPC5	2447454	ILMN_1768394	20142	-5.93e-05	-0.958259	-0.0921523	1.01401	0.120393	-0.945019	-0.76543	0.344695	0.444015	0.762979	0.999878
ARPP19	3624697	ILMN_1772798	2140368	-0.000200388	-0.0976342	0.00394499	0.585918	0.42865	-0.166635	0.00920328	0.867664	0.992657	0.971056	0.999878
ARR3	3980522	ILMN_1660126	3850307	-0.000190548	-0.534024	-0.481492	0.778304	0.443544	-0.686138	-1.08556	0.492658	0.277675	0.847058	0.999878
ARRB1	3382216	ILMN_1819608	6860593	-0.00018013	-0.677246	0.10461	0.608875	0.206578	-1.11229	0.506395	0.266066	0.61258	0.706494	0.999878
ARRB2	3707095	ILMN_1675866	3930133	-8.74e-05	0.424295	-0.161373	0.687089	0.46262	0.617525	-0.348824	0.536916	0.727222	0.869071	0.999878
ARRDC1	3195363	ILMN_1661492	4850646	0.00068771	-1.38062	-0.182008	0.704572	0.440766	-1.95951	-0.412936	0.0501076	0.679654	0.384461	0.999878
ARRDC2	3824713	ILMN_1655612	7000609	-0.000153797	-0.44069	-0.19831	0.952206	0.295481	-0.46281	-0.671145	0.643521	0.502128	0.911399	0.999878
ARRDC3	2866704	ILMN_2198516	6450161	0.00657793	-2.89647	-0.418828	0.481256	0.469759	-6.01856	-0.891579	1.88e-09	0.372619	5.68e-06	0.999878
ARRDC4	3610611	ILMN_1660544	6580168	-0.000197885	-0.089229	0.640088	0.57853	0.388642	-0.154234	1.64698	0.877431	0.0995612	0.973164	0.999878
ARSA	3966143	ILMN_1656477	4920546	-0.000189981	-0.170207	-0.118491	0.896624	0.307036	-0.189831	-0.385918	0.849449	0.699557	0.966477	0.999878
ARSD	3997738	ILMN_1684873	6580689	0.0001749	0.524613	-0.36088	0.446992	0.289672	1.17365	-1.24582	0.24059	0.212829	0.689444	0.999878
ARSE	3997780	ILMN_1727462	3940630	-0.000140727	0.2198	-0.375751	0.580658	0.598436	0.378536	-0.627888	0.705048	0.530077	0.928286	0.999878
ARSF	3967018	ILMN_1664001	4390403	-0.000163857	0.222844	-0.597521	0.807231	0.599131	0.27606	-0.997314	0.782513	0.318612	0.948334	0.999878
ARSG	3732793	ILMN_1720604	3190753	0.000153316	-1.01352	0.268426	0.759369	0.34339	-1.33469	0.781695	0.182038	0.434394	0.629338	0.999878
ARSJ	2782694	ILMN_1679318	2640725	-7.03e-05	-0.336757	0.166905	0.676526	0.494214	-0.497774	0.337717	0.618665	0.735576	0.900569	0.999878
ARSK	2820865	ILMN_1657050	7560255	-1.64e-05	0.334873	-0.00513115	0.564508	0.553065	0.593211	-0.00927767	0.553066	0.992598	0.87474	0.999878
ART1	3317824	ILMN_1807913	3710114	-0.000159593	0.255894	-0.108715	0.381744	0.382825	0.670328	-0.28398	0.502679	0.776426	0.852506	0.999878
ART4	3445723	ILMN_1805773	1400577	-0.000197298	0.0114133	0.589768	0.319633	0.473471	0.0357076	1.24563	0.971517	0.212901	0.995497	0.999878
ARTN	2333574	ILMN_1762952	1850246	-0.000142069	-0.432437	0.325885	0.729853	0.594449	-0.592498	0.548213	0.553544	0.583545	0.87474	0.999878
ARV1	2385095	ILMN_1800935	1500246	-0.000215868	0.182718	-0.503619	0.610614	0.37424	0.299237	-1.34571	0.764771	0.178396	0.944376	0.999878
ARVCF	3952956	ILMN_1677226	5810301	-0.000189105	0.177183	0.272373	1.19078	0.51112	0.148797	0.532894	0.88172	0.594107	0.974542	0.999878
ARX	4003155	ILMN_1724162	4070020	-0.00017298	-0.56184	-0.155936	0.974895	0.556133	-0.576308	-0.280394	0.564433	0.779175	0.878129	0.999878
AS3MT	3261923	ILMN_1771732	4280390	-7.18e-06	0.31728	-0.164444	0.402971	0.461545	0.787353	-0.35629	0.431112	0.721623	0.82035	0.999878
ASAH1	3126087	ILMN_1655509	5420332	0.000474823	-0.868936	0.0765651	0.611417	0.439182	-1.42118	0.174336	0.155325	0.861601	0.590199	0.999878
ASAH2	3289189	ILMN_1800237	4210132	-0.000195616	-0.0174902	-0.556969	0.408494	0.499797	-0.0428164	-1.11439	0.96585	0.265111	0.993932	0.999878
ASAP1	3153428	ILMN_1690963	7000072	-9.4e-05	-0.493176	0.0339635	0.572619	0.146118	-0.861264	0.23244	0.389134	0.816197	0.794281	0.999878
ASAP2	2468811	ILMN_1757237	2030041	0.00018009	0.684346	0.655911	0.613092	0.411208	1.11622	1.59508	0.264381	0.110694	0.705429	0.999878
ASB1	2534865	ILMN_1683096	1820347	0.000116203	-0.881371	0.321663	0.72021	0.342033	-1.22377	0.940444	0.221097	0.34699	0.669337	0.999878
ASB10	3079438	ILMN_1781148	4570017	0.000200109	-0.952567	0.456516	0.651527	0.472373	-1.46205	0.966431	0.143789	0.333828	0.570141	0.999878
ASB13	3275042	ILMN_1654385	5050575	0.000141824	-0.875931	-0.435621	0.750384	0.432188	-1.16731	-1.00794	0.24314	0.313482	0.691593	0.999878
ASB15	3021696	ILMN_1740528	2030747	-0.000125098	0.461935	0.484762	0.600652	0.603149	0.769056	0.803719	0.441896	0.421559	0.825567	0.999878
ASB16	3722806	ILMN_1810881	2320152	-0.00012206	0.600068	0.643905	0.844685	0.424049	0.710404	1.51847	0.477487	0.128896	0.840204	0.999878
ASB17	2418700	ILMN_1670829	1580523	-0.000154083	0.380882	-0.265545	0.654395	0.457633	0.582036	-0.580258	0.560568	0.56174	0.877127	0.999878
ASB4	3013498	ILMN_1813668	1170382	1.53e-05	-0.50649	0.653295	0.516234	0.422966	-0.981124	1.54456	0.326579	0.122453	0.752011	0.999878
ASB5	2794704	ILMN_2126055	5270554	0.000166016	0.801402	0.240796	0.691742	0.469281	1.15853	0.513117	0.246704	0.60787	0.693926	0.999878
ASB6	3227014	ILMN_1806705	1780450	-0.000117793	-0.411433	0.0489194	0.759308	0.398335	-0.541852	0.12281	0.587944	0.902258	0.887656	0.999878
ASB7	3611506	ILMN_1753040	2190156	-0.000156698	-0.444207	-0.525802	0.718836	0.420092	-0.617954	-1.25163	0.536634	0.210703	0.869071	0.999878
ASB8	3453036	ILMN_2173740	870451	8.52e-05	0.43182	-0.223121	0.483034	0.311194	0.893974	-0.716984	0.371379	0.473384	0.780834	0.999878
ASCC2	3957003	ILMN_1679919	1570523	0.00511198	1.58228	0.105566	0.329547	0.07777	4.80136	1.35741	1.62e-06	0.174651	0.00102838	0.999878
ASCC3	2966636	ILMN_2294751	870040	-0.000153888	0.283647	-0.189979	0.824778	0.391803	0.343907	-0.484885	0.730931	0.627758	0.936945	0.999878
ASCL4	3430603	ILMN_1813075	540437	-9.91e-05	-0.270067	0.753111	0.38089	0.596717	-0.709043	1.26209	0.47833	0.206916	0.840414	0.999878
ASF1A	2923359	ILMN_1714737	7560048	-9.79e-05	0.490407	-0.139343	0.545411	0.332235	0.899151	-0.419409	0.368615	0.674917	0.779246	0.999878
ASF1B	3852565	ILMN_1695414	2630673	-1.94e-05	-0.500074	-0.110802	0.498005	0.311503	-1.00415	-0.3557	0.315352	0.722065	0.742331	0.999878
ASH2L	3094447	ILMN_1666933	3440348	-0.000185797	-0.103407	-0.165683	0.656165	0.337547	-0.157594	-0.490843	0.874783	0.623537	0.972981	0.999878
ASIC1	3414351	ILMN_1727251	3290445	-8.58e-05	0.864064	0.430438	0.841685	0.591036	1.02659	0.728277	0.304664	0.466444	0.732805	0.999878
ASIC2	3752888	ILMN_1665932	2100255	0.00050708	-1.77061	-0.505841	0.917139	0.474295	-1.93058	-1.06651	0.0535907	0.286192	0.39642	0.999878
ASIC3	3031800	ILMN_2368728	6130451	-2.83e-05	0.44589	-0.470694	0.547254	0.641662	0.814777	-0.733554	0.415238	0.46322	0.809779	0.999878
ASIC4	2528645	ILMN_2394902	3190082	-7.68e-05	-0.639053	0.55636	1.00464	0.552184	-0.636104	1.00756	0.524738	0.313664	0.8644	0.999878
ASIC5	2790999	ILMN_1750295	3310397	0.000192775	-1.14587	0.310907	0.707896	0.489656	-1.61869	0.63495	0.105576	0.525461	0.513188	0.999878
ASIP	3882823	ILMN_1791647	3460474	-0.000116465	0.416371	-0.584577	0.522536	0.544555	0.796827	-1.07349	0.425589	0.283049	0.817052	0.999878
ASNA1	3821847	ILMN_1657571	4480435	0.000156906	-0.71278	-0.21037	0.510157	0.375513	-1.39718	-0.560219	0.162422	0.57533	0.599261	0.999878
ASNS	3062576	ILMN_1796417	1510296	5.6e-05	0.568796	-0.443607	0.502732	0.283132	1.13141	-1.56679	0.257937	0.117165	0.70082	0.999878
ASNSD1	2519860	ILMN_2221673	6960242	-0.000197334	-0.0812786	0.0771249	0.557606	0.201173	-0.145764	0.383376	0.884114	0.701441	0.974888	0.999878
ASPA	3706659	ILMN_1692824	3140209	-0.000151993	0.274547	-0.246806	0.63743	0.449189	0.430709	-0.549449	0.666698	0.582698	0.917857	0.999878
ASPDH	3868518	ILMN_1757747	1110221	-0.000109219	0.274351	0.452954	0.593356	0.573836	0.462372	0.789344	0.643834	0.429911	0.911399	0.999878
ASPHD1	3655771	ILMN_1662490	7210703	0.000185878	-1.05561	0.333694	0.728129	0.447487	-1.44975	0.745706	0.14719	0.455845	0.573929	0.999878
ASPHD2	3940992	ILMN_2167426	7400102	7.27e-05	0.632855	-0.493719	0.517807	0.381175	1.22218	-1.29525	0.221696	0.195233	0.669975	0.999878
ASPM	2449559	ILMN_1815184	6130441	-9.26e-05	0.214584	-0.913573	0.526044	0.438019	0.40792	-2.08569	0.68335	0.0370064	0.923108	0.999878
ASPN	3214845	ILMN_2168166	4050431	0.000198512	0.675074	0.0801058	0.485063	0.587512	1.39173	0.136348	0.164067	0.891547	0.602409	0.999878
ASPRV1	2558355	ILMN_1762284	4860255	-0.000215357	0.191005	-0.0464135	0.600317	0.284909	0.318174	-0.162906	0.750366	0.870592	0.940913	0.999878
ASTE1	2695295	ILMN_1803813	6650026	-0.00019416	0.0380797	-0.359416	0.649654	0.388972	0.0586153	-0.924015	0.953261	0.355478	0.991925	0.999878
ASTL	2565099	ILMN_1728055	6400070	-9.68e-05	0.677007	-0.417054	0.598951	0.592831	1.13032	-0.703497	0.258394	0.481746	0.701341	0.999878
ASUN	3448428	ILMN_2196337	6400082	6.83e-05	0.75637	0.159405	0.567408	0.399366	1.33303	0.399145	0.182583	0.689786	0.629784	0.999878
ASXL2	2544925	ILMN_1698968	650075	0.000447293	1.16193	0.0723445	0.618849	0.218139	1.87757	0.331643	0.0604976	0.740159	0.41568	0.999878
ASZ1	3069399	ILMN_1782246	1510431	-0.000116667	-0.22972	0.490412	0.813	0.452224	-0.282558	1.08445	0.777527	0.278167	0.946958	0.999878
ATAD1	3299255	ILMN_1654497	5260221	0.000302032	-1.0025	0.144603	0.649327	0.390699	-1.5439	0.370113	0.122675	0.711298	0.541779	0.999878
ATAD2	3151534	ILMN_2048700	1410242	-0.000175194	0.114288	-0.0501697	0.640135	0.416935	0.178537	-0.12033	0.858309	0.904222	0.968892	0.999878
ATAD3C	2315918	ILMN_1780923	5810041	4.64e-05	-0.192975	0.923451	0.289399	0.524853	-0.666814	1.75945	0.504922	0.0785016	0.853458	0.999878
ATAD5	3716893	ILMN_1806956	2120592	0.000634035	0.987515	-0.5064	0.498326	0.423921	1.98167	-1.19456	0.0475708	0.232258	0.375887	0.999878
ATCAY	3817186	ILMN_1656576	7050577	0.000462607	-2.05893	0.55446	0.945193	0.540542	-2.17832	1.02575	0.0294285	0.30501	0.302571	0.999878
ATE1	3310413	ILMN_1756867	6770243	0.000276878	0.917861	0.0627387	0.670986	0.486712	1.36793	0.128903	0.171396	0.897434	0.610706	0.999878
ATF1	3414695	ILMN_1801923	7200575	-0.000197907	-0.0080903	-0.763472	0.293434	0.36776	-0.0275711	-2.076	0.978005	0.0378935	0.9974	0.999878
ATF2	2588066	ILMN_1748271	2100735	-0.000192602	0.05384	-0.208476	0.751356	0.483788	0.0716572	-0.430924	0.942878	0.666524	0.990469	0.999878
ATF4	3945914	ILMN_1783394	6480053	0.00148834	-1.88209	0.181136	0.639453	0.433199	-2.94328	0.418135	0.00326233	0.675848	0.101579	0.999878
ATF6	2363919	ILMN_1703471	5420343	-0.000206873	-0.1034	-0.506323	0.578995	0.282166	-0.178585	-1.79441	0.858271	0.0727472	0.968892	0.999878
ATF7IP2	3647827	ILMN_1804445	2480075	-0.000208656	0.21829	-0.718463	0.437122	0.368491	0.499379	-1.94974	0.617534	0.0512067	0.899684	0.999878
ATG12	2871923	ILMN_1673898	5720142	-0.000213242	-0.17915	-0.431439	0.576584	0.445933	-0.310709	-0.967496	0.756035	0.333296	0.941916	0.999878
ATG13	3329404	ILMN_1730930	6620079	-0.000184785	0.197428	-0.221397	0.942741	0.418025	0.209419	-0.529626	0.83413	0.596371	0.964308	0.999878
ATG14	3565739	ILMN_1678808	4560154	0.00050551	1.13759	-1.23218	0.576204	0.456603	1.97428	-2.69858	0.048405	0.00696363	0.37923	0.999878
ATG16L1	2532793	ILMN_1725707	2760491	0.00088641	1.71178	-0.509777	0.744523	0.374225	2.29916	-1.36222	0.0215364	0.173128	0.261635	0.999878
ATG2B	3578278	ILMN_1735006	4780762	1.69e-05	-0.870006	-0.179887	0.796923	0.499833	-1.09171	-0.359895	0.275014	0.718926	0.713876	0.999878
ATG3	2688759	ILMN_2163732	1690253	-0.000192559	-0.0614992	-0.0490417	0.783704	0.473163	-0.0784725	-0.103646	0.937455	0.91745	0.988981	0.999878
ATG4A	3986672	ILMN_1768960	5290370	0.00049382	1.156	0.319028	0.627737	0.487969	1.84153	0.653786	0.0656021	0.513249	0.426942	0.999878
ATG4C	2339511	ILMN_1700923	5090291	-2.18e-05	-0.472153	-0.148413	0.507134	0.418512	-0.931022	-0.354621	0.351887	0.722873	0.766257	0.999878
ATG4D	3820571	ILMN_1801905	1450647	-0.000138975	-0.493846	-0.551389	0.978523	0.42591	-0.504685	-1.29461	0.613802	0.195453	0.898228	0.999878
ATG5	2967550	ILMN_1718265	2030228	0.000269115	-1.13881	0.0514524	0.692181	0.409479	-1.64525	0.125653	0.0999805	0.900006	0.498661	0.999878
ATG7	2610732	ILMN_1790978	5220754	-0.000185874	-0.250504	0.0560242	0.678656	0.295643	-0.369118	0.189499	0.712055	0.849701	0.931261	0.999878
ATG9B	3079257	ILMN_1734655	2570204	-1.97e-06	1.64696	-0.0766201	1.30269	0.539665	1.26427	-0.141977	0.20619	0.887098	0.655941	0.999878
ATHL1	3315607	ILMN_1794707	3310278	0.00101448	-1.43908	0.0782746	0.603637	0.114603	-2.38401	0.683008	0.0171618	0.494602	0.233852	0.999878
ATIC	2526759	ILMN_1673991	1770546	0.000157278	0.900363	-0.144658	0.618287	0.244893	1.45622	-0.590698	0.145394	0.554723	0.572063	0.999878
ATL1	3535186	ILMN_1689251	430372	-7.56e-05	-0.438469	0.815424	0.613913	0.438171	-0.71422	1.86097	0.475124	0.0627482	0.838562	0.999878
ATL2	2548776	ILMN_1716384	2850494	-0.000137707	0.353959	-0.0202346	0.64467	0.474543	0.549054	-0.0426401	0.582992	0.965988	0.885996	0.999878
ATL3	3376560	ILMN_1751086	1240243	0.000383201	1.00764	0.18899	0.695837	0.381285	1.4481	0.495665	0.147651	0.620131	0.574488	0.999878
ATM	3347658	ILMN_1716231	7330592	-0.000187684	-0.590698	-0.0092904	0.682211	0.478638	-0.865858	-0.0194101	0.386609	0.984514	0.792811	0.999878
ATMIN	3670668	ILMN_1772540	1050180	-0.000184754	-0.162628	-0.104454	0.394756	0.414731	-0.411972	-0.25186	0.680378	0.801149	0.922041	0.999878
ATOH1	2736224	ILMN_1740671	6660129	-7.44e-05	-0.137699	0.537428	0.227628	0.614011	-0.604933	0.875273	0.545251	0.381425	0.871618	0.999878
ATOH7	3292561	ILMN_1752393	4480047	-9e-06	-0.454807	-0.522917	0.487671	0.482304	-0.932611	-1.08421	0.351066	0.278274	0.765784	0.999878
ATOH8	2491788	ILMN_1654065	3840376	-5.49e-05	0.737593	-0.0846966	0.700705	0.3939	1.05264	-0.215021	0.292555	0.829751	0.726115	0.999878
ATP10B	2884727	ILMN_1698804	4730180	-5.64e-05	-0.506702	-0.371811	0.602748	0.427904	-0.840653	-0.868911	0.400582	0.384896	0.801563	0.999878
ATP10D	2726072	ILMN_1656159	5490681	0.00062143	-1.12413	-0.788848	0.627852	0.582196	-1.79044	-1.35495	0.0734436	0.175433	0.445841	0.999878
ATP11B	2654815	ILMN_1658884	6060706	0.000498918	-0.868273	0.237225	0.553	0.3992	-1.57011	0.594251	0.116452	0.552344	0.53113	0.999878
ATP11C	4024160	ILMN_2389810	6040204	1.77e-05	-0.632798	0.0198548	0.719685	0.39591	-0.87927	0.0501497	0.379297	0.960003	0.786594	0.999878
ATP12A	3481890	ILMN_1687765	1820414	-0.000199143	-0.122761	0.473792	0.957693	0.464957	-0.128184	1.019	0.898008	0.308203	0.978362	0.999878
ATP13A1	3855910	ILMN_2134224	2060193	0.000459906	-1.79622	0.579538	1.01082	0.259213	-1.77699	2.23576	0.07563	0.0253676	0.450159	0.999878
ATP13A3	2711644	ILMN_1768895	840672	0.000291606	0.712765	0.284283	0.622834	0.536336	1.14439	0.530046	0.252516	0.59608	0.698696	0.999878
ATP13A4	2711205	ILMN_1651303	780195	-7.92e-05	0.510478	0.103655	0.562315	0.459177	0.907815	0.225742	0.364019	0.821402	0.775262	0.999878
ATP1A2	2362892	ILMN_1777411	3990092	-0.000168853	-0.219451	0.419632	1.07509	0.536043	-0.204123	0.782833	0.838265	0.433725	0.964766	0.999878
ATP1A3	3863342	ILMN_1689098	770338	-0.000201256	0.0691152	0.925137	0.486336	0.418057	0.142114	2.21295	0.886995	0.0269013	0.975565	0.999878
ATP1A4	2362950	ILMN_1696132	3460131	-0.000168137	-0.454383	0.654722	0.980798	0.596924	-0.463279	1.09683	0.643184	0.272717	0.911399	0.999878
ATP1B1	2366422	ILMN_1730291	6060482	0.00120985	-1.2197	-0.661734	0.435038	0.392267	-2.80366	-1.68695	0.0050719	0.0916128	0.13087	0.999878
ATP1B2	3708938	ILMN_1747271	10255	0.00188545	1.45299	0.803921	0.489759	0.509192	2.96675	1.57882	0.00302376	0.114378	0.096905	0.999878
ATP1B3	2645764	ILMN_1759628	4220632	0.000807461	0.913777	-0.243395	0.410165	0.238614	2.22783	-1.02003	0.025936	0.307712	0.289647	0.999878
ATP1B4	3989110	ILMN_1653211	6100706	-0.00019711	-0.0751439	0.101868	0.691614	0.586738	-0.10865	0.173618	0.913484	0.862166	0.982548	0.999878
ATP2A2	3431483	ILMN_1687375	1940053	0.000309936	1.17787	0.716229	0.663589	0.455528	1.775	1.57231	0.0759589	0.11588	0.450873	0.999878
ATP2A3	3741800	ILMN_1697827	1110678	0.00089112	-2.23776	-0.0558032	0.971263	0.331967	-2.30397	-0.168099	0.0212651	0.866506	0.261415	0.999878
ATP2B1	3464983	ILMN_1750599	6180059	-0.000126706	-0.322239	-0.53521	0.562379	0.443482	-0.572993	-1.20684	0.566675	0.227495	0.879386	0.999878
ATP2B3	3995666	ILMN_1693481	3180079	0.000648337	-2.41025	-0.137681	1.133	0.570895	-2.12732	-0.241166	0.033442	0.809426	0.319779	0.999878
ATP2C2	3671727	ILMN_1785413	2510669	-5.04e-05	0.67695	0.0977952	1.23796	0.427036	0.546828	0.229009	0.584521	0.818862	0.886418	0.999878
ATP4A	3859832	ILMN_2209417	5270040	-0.000201817	-0.0496662	0.324042	1.1938	0.518517	-0.0416033	0.624939	0.966817	0.532011	0.994502	0.999878
ATP4B	3526655	ILMN_1771680	7610164	-0.00022765	-0.235257	0.0267463	0.785836	0.508565	-0.299371	0.0525917	0.764669	0.958057	0.944376	0.999878
ATP5B	3458033	ILMN_1772132	4540021	0.00107351	1.67978	0.0983103	0.736607	0.209565	2.28043	0.469116	0.0226235	0.638987	0.26832	0.999878
ATP5C1	3234140	ILMN_1685774	360382	-8.61e-05	-0.365498	-0.0226451	0.542678	0.17587	-0.673508	-0.12876	0.500655	0.897547	0.851983	0.999878
ATP5D	3815610	ILMN_1653599	3190671	-0.000102973	0.630052	-0.0747284	0.850809	0.174535	0.740533	-0.428157	0.459011	0.668537	0.833637	0.999878
ATP5F1	2351817	ILMN_1672191	1010598	0.000302188	0.305127	-0.22748	0.226038	0.25236	1.34989	-0.901411	0.177112	0.36737	0.620587	0.999878
ATP5G1	3725456	ILMN_1712430	460040	-0.00019062	-0.203699	-0.595536	0.441797	0.438868	-0.46107	-1.35698	0.644768	0.174787	0.911399	0.999878
ATP5G2	3456313	ILMN_1660577	7330612	-0.000199088	0.0890837	-0.0765724	0.490649	0.17124	0.181563	-0.447163	0.855933	0.654757	0.968425	0.999878
ATP5H	3770563	ILMN_1666372	4290300	-0.000173714	-0.121411	-0.011053	0.289376	0.213613	-0.419562	-0.0517431	0.674823	0.958733	0.9207	0.999878
ATP5I	2756497	ILMN_1726603	1580603	8.03e-05	-0.684096	0.113341	0.529208	0.156083	-1.29268	0.726158	0.196182	0.467742	0.646428	0.999878
ATP5J	3927175	ILMN_1772929	5860162	-0.000129412	-0.532412	0.0452328	0.675372	0.155523	-0.788324	0.290844	0.430544	0.771171	0.819858	0.999878
ATP5L	3351359	ILMN_2079285	4070544	-7.96e-05	0.335922	-0.236968	0.346843	0.338085	0.968514	-0.700912	0.332834	0.483358	0.756044	0.999878
ATP6AP1	3996381	ILMN_1697694	6590201	0.0012156	-2.57485	0.0836454	0.876668	0.175878	-2.93709	0.475587	0.00332806	0.634369	0.102959	0.999878
ATP6AP2	3974556	ILMN_1677440	7560097	0.000327588	-0.900018	-0.09368	0.649229	0.159534	-1.38629	-0.587211	0.165721	0.557062	0.604475	0.999878
ATP6V0A1	3721718	ILMN_1752579	1660215	-0.000186761	-0.110167	-0.0073427	0.203118	0.201032	-0.542378	-0.0365249	0.587582	0.970864	0.887656	0.999878
ATP6V0A2	3436021	ILMN_1700380	620092	-0.000196846	-0.0037236	0.224151	0.292817	0.429399	-0.0127165	0.522012	0.989855	0.601662	0.997984	0.999878
ATP6V0A4	3075381	ILMN_1721788	4810731	-0.000195091	0.319481	-0.493836	0.990095	0.635215	0.322677	-0.77743	0.746954	0.436905	0.939825	0.999878
ATP6V0D1	3695699	ILMN_1795826	6330377	0.000529763	-1.48593	0.0230527	0.66291	0.159825	-2.24153	0.144237	0.025035	0.885313	0.283779	0.999878
ATP6V0D2	3105749	ILMN_1799889	1980706	0.000307799	1.2813	0.396355	0.774675	0.436188	1.65399	0.908681	0.0981927	0.363519	0.494865	0.999878
ATP6V0E1	2841284	ILMN_1715635	2320110	-0.000105233	-0.670844	-0.143766	0.720861	0.190361	-0.930616	-0.755229	0.352097	0.450112	0.766257	0.999878
ATP6V0E2	3031181	ILMN_1785095	6180088	-5.74e-05	-0.550685	-0.154696	0.929036	0.186375	-0.592749	-0.830023	0.553376	0.406526	0.87474	0.999878
ATP6V1A	2636589	ILMN_1711516	7050131	-0.000101095	-0.834254	0.0554824	0.651558	0.153452	-1.2804	0.361562	0.200464	0.717679	0.650751	0.999878
ATP6V1B1	2487918	ILMN_1812073	2850482	-0.000185679	-0.0861358	-0.625603	1.13458	0.48537	-0.0759189	-1.28892	0.939487	0.197426	0.989319	0.999878
ATP6V1C1	3110171	ILMN_1659801	2480241	0.000348306	-1.22104	-0.00391707	0.60319	0.317941	-2.0243	-0.0123201	0.042992	0.99017	0.357032	0.999878
ATP6V1C2	2469529	ILMN_1660729	10070	-0.000162448	0.53141	-0.580532	0.770389	0.592396	0.689795	-0.979973	0.490355	0.327099	0.844956	0.999878
ATP6V1D	3569200	ILMN_1797310	1660736	0.000138536	0.510074	0.106918	0.429042	0.231425	1.18887	0.461999	0.234548	0.644082	0.683244	0.999878
ATP6V1E1	3951887	ILMN_1798485	6860543	0.000154982	-0.671045	0.152403	0.503096	0.190218	-1.33383	0.801205	0.18232	0.423013	0.629338	0.999878
ATP6V1F	3023211	ILMN_2099783	3870630	-3.74e-05	-0.811394	0.0220803	0.805043	0.217244	-1.00789	0.101638	0.313556	0.919044	0.741396	0.999878
ATP6V1G1	3186191	ILMN_1784523	6370091	0.00232982	-2.01701	0.0177635	0.546705	0.143666	-3.68939	0.123644	0.000227162	0.901597	0.0238955	0.999878
ATP6V1G3	2449922	ILMN_1726273	5960162	-0.000100444	-0.321267	0.286567	0.512255	0.467147	-0.627162	0.61344	0.530581	0.539585	0.866961	0.999878
ATP6V1H	3135452	ILMN_2403730	6330279	-3.92e-05	0.696982	-0.538182	0.783216	0.359579	0.889897	-1.4967	0.373564	0.134472	0.782219	0.999878
ATP7A	3982423	ILMN_1808115	6280414	0.000232435	-0.723512	-0.403994	0.462201	0.440244	-1.56536	-0.91766	0.117561	0.358797	0.533562	0.999878
ATP8A2	3482274	ILMN_1693896	4590577	-6.3e-05	-0.948263	0.704329	1.07348	0.639367	-0.883356	1.1016	0.377086	0.270635	0.785324	0.999878
ATP8B1	3809826	ILMN_1710523	6040240	0.00103769	1.79795	0.422899	0.627261	0.46186	2.86636	0.915642	0.0041695	0.359855	0.11675	0.999878
ATP8B4	3623552	ILMN_1783956	1820270	0.000112303	-0.464965	0.273001	0.393387	0.32219	-1.18195	0.847329	0.23728	0.396812	0.686158	0.999878
ATP9B	3795045	ILMN_1658684	2120209	0.000303803	-1.26348	-0.249148	0.835291	0.46285	-1.51262	-0.538291	0.130439	0.590376	0.551158	0.999878
ATPIF1	2327375	ILMN_1685978	3780068	-0.00019737	0.15016	-0.35157	0.604776	0.358318	0.248291	-0.981169	0.80392	0.32651	0.953562	0.999878
ATR	2698844	ILMN_1810385	3780364	-0.000105836	-0.655241	0.0615985	0.83734	0.481793	-0.782527	0.127853	0.433941	0.898266	0.821812	0.999878
ATRAID	2474322	ILMN_2386016	3800025	-0.000125024	-0.501853	-0.267773	0.75159	0.282511	-0.667721	-0.947833	0.504342	0.343214	0.853078	0.999878
ATRN	3874313	ILMN_2355586	1710494	-0.000157879	0.331718	-0.591776	0.940046	0.484553	0.352874	-1.22128	0.724198	0.221979	0.935004	0.999878
ATRX	4013224	ILMN_1690568	670044	0.000652701	-0.832455	0.0837459	0.397138	0.480967	-2.09614	0.17412	0.0361199	0.861771	0.331237	0.999878
ATXN10	3948754	ILMN_1705900	6180014	0.000499109	1.26091	0.633407	0.66013	0.281005	1.9101	2.25408	0.0561772	0.0241912	0.402967	0.999878
ATXN2	3471588	ILMN_1743829	1090400	0.000749793	1.68128	0.297466	0.795861	0.279539	2.11253	1.06413	0.0346902	0.287269	0.324044	0.999878
ATXN7L1	3066613	ILMN_1777260	2350615	0.00164451	1.48693	-0.505499	0.45446	0.509884	3.27187	-0.9914	0.00107559	0.32149	0.056207	0.999878
ATXN7L2	2350741	ILMN_1664177	2710187	6.77e-05	1.66289	0.0204471	1.09963	0.47953	1.51222	0.0426399	0.13054	0.965989	0.551158	0.999878
ATXN7L3B	3422703	ILMN_1826531	2940452	-0.000190197	0.153369	-0.205031	0.616426	0.326722	0.248803	-0.627539	0.803523	0.530306	0.953502	0.999878
AUH	3214359	ILMN_2231911	7330180	-0.000219648	-0.123324	-0.306582	0.761194	0.450132	-0.162014	-0.681093	0.871301	0.495813	0.971943	0.999878
AUNIP	2402416	ILMN_1787280	150129	8.13e-05	0.730985	0.139714	0.519989	0.568656	1.40577	0.245691	0.159854	0.805921	0.597417	0.999878
AUP1	2560254	ILMN_1651378	6290053	-0.000200708	-0.100124	0.31723	0.580143	0.350935	-0.172584	0.903958	0.862985	0.366018	0.969387	0.999878
AURKA	3910785	ILMN_2357438	5420309	-0.000159321	-0.270641	-0.207183	0.444289	0.496447	-0.609155	-0.417332	0.542449	0.676436	0.870804	0.999878
AURKB	3744263	ILMN_1684217	6770026	-0.000194549	0.0582904	-0.698448	0.81012	0.480896	0.0719528	-1.45239	0.942642	0.146393	0.99038	0.999878
AURKC	3843122	ILMN_2350296	5890634	-5.1e-05	0.87936	-0.305058	0.985944	0.497462	0.891896	-0.613229	0.372491	0.539725	0.782219	0.999878
AVEN	3617170	ILMN_1710216	3800634	0.000165975	0.966972	-0.811013	0.496301	0.428655	1.94836	-1.89199	0.0514277	0.0584918	0.388423	0.999878
AVIL	3458857	ILMN_1674265	4390369	0.00274703	2.07312	0.0359691	0.540651	0.440746	3.83449	0.0816097	0.00012736	0.934957	0.0184902	0.999878
AVL9	2996033	ILMN_1722292	5700112	0.000714373	-1.6848	-0.383355	0.769985	0.471689	-2.1881	-0.812728	0.0287082	0.416374	0.300813	0.999878
AVP	3895224	ILMN_2230117	580397	-0.000136011	-0.4768	-0.269967	0.620786	0.574118	-0.768058	-0.47023	0.442489	0.638191	0.825809	0.999878
AVPI1	3302495	ILMN_1671731	990500	-0.000155755	0.232047	-0.234375	0.537532	0.376418	0.431689	-0.622644	0.665986	0.533518	0.917857	0.999878
AVPR1A	3459722	ILMN_1712159	5220176	-0.000198961	-0.129515	0.0968643	0.506325	0.588231	-0.255793	0.164671	0.798121	0.869203	0.952423	0.999878
AVPR2	3996047	ILMN_1698324	4200576	0.000115097	-0.834964	0.599639	0.623893	0.308149	-1.33831	1.94594	0.180855	0.0516618	0.627044	0.999878
AWAT2	4011569	ILMN_1703832	6590747	-1.58e-05	0.4294	0.413077	0.666783	0.612236	0.643987	0.674703	0.519613	0.499865	0.861327	0.999878
AXIN1	3675047	ILMN_1766185	3460754	0.000341743	-1.78597	0.301735	0.991565	0.219024	-1.80117	1.37764	0.0717364	0.168315	0.440207	0.999878
AXIN2	3767480	ILMN_1724480	1070189	0.000256262	-1.01019	-0.274964	0.674672	0.286542	-1.49731	-0.959594	0.134376	0.33726	0.557815	0.999878
AXL	3834046	ILMN_1701877	4640403	-3.39e-05	-1.57508	-0.439498	1.28177	0.43893	-1.22883	-1.00129	0.219194	0.316685	0.667139	0.999878
AZGP1	3063589	ILMN_1797154	7200324	-0.000196659	0.113417	0.134144	0.396747	0.579663	0.285868	0.231417	0.774991	0.816991	0.946917	0.999878
AZI2	2667181	ILMN_1733680	5490348	-6.56e-05	0.308152	-0.207549	0.561715	0.304591	0.548591	-0.681404	0.583311	0.495616	0.886033	0.999878
AZIN1	3147591	ILMN_1656682	2480039	-0.000198426	-0.0678235	0.0609803	0.672789	0.208854	-0.100809	0.291975	0.919706	0.770305	0.983532	0.999878
AZU1	3815210	ILMN_1730867	5670739	-0.000180215	-0.455673	0.190299	0.786113	0.209826	-0.579654	0.906939	0.562174	0.364439	0.8776	0.999878
B2M	3592023	ILMN_2148459	240195	0.000687944	-1.59594	-0.0661444	0.859805	0.114385	-1.85617	-0.578262	0.0634877	0.563087	0.421645	0.999878
B3GALNT2	2461891	ILMN_1780188	160376	-2.41e-05	0.524454	-0.15395	0.472578	0.475603	1.10977	-0.323693	0.26715	0.74617	0.707207	0.999878
B3GALT6	2315633	ILMN_1739749	2510477	-8.71e-05	0.58986	0.247127	0.763139	0.387146	0.772939	0.638332	0.439595	0.523258	0.825053	0.999878
B3GALTL	3484296	ILMN_1764813	4640673	0.00129028	-1.42862	-0.78158	0.564121	0.506128	-2.53247	-1.54423	0.0113564	0.122532	0.191659	0.999878
B3GAT2	2960303	ILMN_1774208	7160041	6.41e-05	0.749299	-0.34876	0.59539	0.62244	1.2585	-0.56031	0.208269	0.575268	0.658007	0.999878
B3GAT3	3375935	ILMN_2210581	7510563	0.000369994	-0.505138	-0.198155	0.324257	0.39816	-1.55783	-0.497677	0.119336	0.618712	0.535366	0.999878
B3GNT1	3378228	ILMN_1715384	2260220	-0.000203837	0.135076	-0.0497815	0.614252	0.536111	0.219904	-0.0928567	0.825955	0.926017	0.961898	0.999878
B3GNT4	3435267	ILMN_1771260	2640386	-0.000159923	-0.487512	0.0481005	0.745197	0.444216	-0.654205	0.108282	0.513009	0.913772	0.857976	0.999878
B3GNT7	2531908	ILMN_1721523	3840020	0.000555128	-0.824901	0.142742	0.472364	0.43332	-1.74633	0.329415	0.0808151	0.741842	0.459715	0.999878
B4GALNT2	3725572	ILMN_1707200	5290189	0.000860679	-2.11068	0.395523	0.87386	0.595517	-2.41536	0.664166	0.0157552	0.506584	0.22418	0.999878
B4GALNT3	3400236	ILMN_1753271	3850022	0.000235605	1.45776	0.422729	1.03931	0.423588	1.40263	0.997974	0.16079	0.318292	0.59765	0.999878
B4GALNT4	3315712	ILMN_1796663	670403	-0.000116126	0.603928	0.160721	1.1382	0.448806	0.530599	0.358107	0.59572	0.720263	0.892062	0.999878
B4GALT2	2333678	ILMN_1806508	3120487	-0.000174424	0.924764	0.687534	0.952379	0.513091	0.971004	1.33998	0.331593	0.18025	0.755553	0.999878
B4GALT5	3908963	ILMN_1685824	2060047	0.00241536	1.96681	0.300249	0.491217	0.164903	4.00395	1.82076	6.32e-05	0.0686436	0.0110353	0.999878
B4GALT6	3803120	ILMN_1732555	4010553	-4.57e-05	0.360981	0.232859	0.504136	0.527789	0.716039	0.441198	0.474	0.65907	0.838315	0.999878
B4GALT7	2843283	ILMN_1663541	520332	-0.000173232	-0.224652	0.14398	0.657083	0.36555	-0.341892	0.393872	0.732446	0.693675	0.937637	0.999878
B9D2	3863046	ILMN_1806999	4280088	-8.48e-05	-0.429314	0.0880374	0.640098	0.27825	-0.6707	0.316397	0.502442	0.751701	0.852506	0.999878
BAALC	3110217	ILMN_1687751	270431	-0.000224813	-0.169765	0.735729	0.621014	0.408334	-0.273367	1.80178	0.784582	0.0715794	0.948562	0.999878
BAAT	3218041	ILMN_1771308	1980491	9.78e-05	-0.796812	0.531318	0.768959	0.568695	-1.03622	0.934276	0.300148	0.350161	0.730369	0.999878
BACE2	3921933	ILMN_1669323	2230731	-0.000178602	-0.0732922	0.0882052	0.576602	0.396712	-0.12711	0.222341	0.898858	0.824049	0.978694	0.999878
BACH2	2964553	ILMN_2058468	7650440	0.000326016	-0.841361	-0.390014	0.528966	0.279446	-1.59058	-1.39567	0.111767	0.162815	0.5237	0.999878
BAD	3376832	ILMN_1720360	6290544	-1.7e-05	-0.714119	-0.115932	0.702442	0.579326	-1.01662	-0.200115	0.309382	0.841391	0.737525	0.999878
BAG1	3203482	ILMN_1733970	2060195	0.00201404	1.19513	0.576168	0.39211	0.515345	3.04794	1.11802	0.00231609	0.263557	0.0854893	0.999878
BAG3	3267314	ILMN_1659766	1340075	-1.65e-05	0.671761	0.0198423	0.671366	0.298166	1.00059	0.0665477	0.317074	0.946942	0.743308	0.999878
BAG4	3094494	ILMN_2221014	2850646	-4.03e-05	-0.451474	0.15782	0.612081	0.409816	-0.737604	0.385099	0.460789	0.700164	0.834713	0.999878
BAHD1	3589947	ILMN_1739256	2650528	0.000360984	-0.935889	0.0819456	0.625798	0.404814	-1.49551	0.202427	0.134843	0.839583	0.55818	0.999878
BAI1	3119017	ILMN_1797130	6220612	-0.00013313	-0.843074	-0.456191	1.49452	0.566311	-0.56411	-0.805548	0.572704	0.420503	0.882174	0.999878
BAI2	2404693	ILMN_1773109	2370474	-0.000157796	-0.350173	-0.210983	1.43292	0.548321	-0.244377	-0.38478	0.806949	0.7004	0.954824	0.999878
BAIAP2L1	3062868	ILMN_1703593	5700343	-0.000196317	-0.0120862	-0.533162	0.899217	0.557008	-0.0134408	-0.957189	0.989277	0.338472	0.997984	0.999878
BAIAP2L2	3960356	ILMN_1771652	6280605	0.00168525	-3.59146	-0.288861	1.15375	0.552911	-3.11286	-0.522438	0.00186321	0.601366	0.0736119	0.999878
BAK1	2950753	ILMN_1805990	1850019	-4.91e-05	-0.388992	-0.196038	0.533697	0.314963	-0.728862	-0.622417	0.46612	0.533668	0.835568	0.999878
BAMBI	3240452	ILMN_1691410	430050	-0.000156372	0.127032	-0.129833	0.380596	0.359413	0.333772	-0.361236	0.738566	0.717923	0.938799	0.999878
BANF1	3335885	ILMN_2179837	150767	2.86e-05	0.388973	0.0447292	0.222068	0.210361	1.7516	0.21263	0.0799042	0.831615	0.459193	0.999878
BANF2	3878076	ILMN_2293451	5670373	-0.000199226	0.016583	0.511471	0.446322	0.574232	0.0371547	0.890704	0.970363	0.373088	0.995497	0.999878
BANK1	2737596	ILMN_1661646	4010139	-0.000160044	-0.0618165	-0.145994	0.297615	0.249756	-0.207706	-0.584548	0.835467	0.558851	0.964308	0.999878
BAP1	2676092	ILMN_1768363	4010528	0.000720085	-1.80915	0.70745	0.902566	0.351317	-2.00446	2.01371	0.0450747	0.04404	0.365511	0.999878
BARD1	2598099	ILMN_2074258	5080561	0.000315584	0.846479	-0.131052	0.47953	0.370743	1.76523	-0.353486	0.0775863	0.723724	0.454878	0.999878
BARHL1	3192495	ILMN_1737662	2760646	6.75e-05	1.34784	-0.355462	1.04564	0.583271	1.28901	-0.609428	0.197453	0.542241	0.646428	0.999878
BARHL2	2422398	ILMN_1706493	6620500	-0.0001613	-0.290683	-0.323721	0.680371	0.539925	-0.427242	-0.599567	0.669221	0.548795	0.918853	0.999878
BARX1	3215395	ILMN_1772312	6450040	-0.000109049	-0.388752	0.226241	0.876367	0.53284	-0.443595	0.424595	0.657354	0.671132	0.915182	0.999878
BARX2	3355956	ILMN_1701170	6550168	-0.000184642	-0.360596	0.600665	0.902638	0.562169	-0.399491	1.06848	0.689548	0.285305	0.924255	0.999878
BATF	3544605	ILMN_1668822	6220195	0.000244673	-0.884664	0.376617	0.630802	0.309782	-1.40244	1.21575	0.160845	0.224081	0.59765	0.999878
BATF3	2454818	ILMN_1763207	5900253	0.000305231	-1.04155	0.471491	0.652489	0.523602	-1.59627	0.900476	0.110492	0.367867	0.522516	0.999878
BAX	3838067	ILMN_1683300	7550110	-0.00016485	-0.106969	0.429122	0.492145	0.379216	-0.217352	1.1316	0.827943	0.257801	0.962538	0.999878
BBS1	3336277	ILMN_1800590	5550554	-9.29e-05	0.636184	-0.796775	0.864332	0.457598	0.736042	-1.74121	0.46174	0.0816465	0.835503	0.999878
BBS10	3462930	ILMN_1741985	3800243	0.00185097	-1.77231	-0.126895	0.540966	0.431655	-3.27619	-0.293974	0.0010593	0.768778	0.055952	0.999878
BBS2	3692928	ILMN_1767612	1410246	-0.000217208	0.0786741	-0.0171625	0.52909	0.310611	0.148697	-0.0552542	0.881799	0.955936	0.974542	0.999878
BBS5	2514365	ILMN_1711053	7610161	6.35e-05	-0.745658	0.605565	0.706531	0.597438	-1.05538	1.0136	0.291302	0.310772	0.725158	0.999878
BCAM	3835777	ILMN_2320280	7320390	-8.64e-05	0.858474	-0.485811	0.958805	0.616299	0.895358	-0.788272	0.370638	0.430537	0.780739	0.999878
BCAN	2361635	ILMN_2246131	1090246	1.25e-05	1.27907	0.365543	1.18513	0.398157	1.07927	0.918087	0.28052	0.358574	0.717182	0.999878
BCAP29	3018535	ILMN_2342084	2940370	-0.000184717	-0.127417	0.428114	0.399185	0.435435	-0.319192	0.983187	0.749594	0.325516	0.940913	0.999878
BCAP31	4026669	ILMN_1812403	6450138	0.00170134	-1.15845	-0.201193	0.33951	0.212363	-3.41212	-0.947399	0.000649661	0.343435	0.0442283	0.999878
BCAR1	3699426	ILMN_1672596	2710746	3.7e-05	-1.08569	0.342399	0.907879	0.571791	-1.19586	0.598819	0.231809	0.549293	0.680214	0.999878
BCAS1	3910360	ILMN_2136147	3060343	-0.000166158	-0.235992	-0.00769178	0.83282	0.466386	-0.283365	-0.0164923	0.776909	0.986842	0.946917	0.999878
BCAS4	3888850	ILMN_1808059	4290079	5.54e-06	-0.796209	0.0145386	0.696778	0.278809	-1.1427	0.0521455	0.253217	0.958413	0.698802	0.999878
BCAT1	3447694	ILMN_1766169	7650524	-0.000241213	0.124011	0.00534683	0.41174	0.328832	0.301188	0.0162601	0.763283	0.987027	0.944376	0.999878
BCCIP	3269662	ILMN_1771966	990598	-0.000199503	0.00855904	-0.125446	0.572747	0.34188	0.0149438	-0.366931	0.988078	0.71367	0.997984	0.999878
BCDIN3D	3454147	ILMN_1796113	7400246	-0.000149063	-0.415502	0.118239	0.506117	0.44373	-0.820961	0.266465	0.411707	0.789881	0.807679	0.999878
BCHE	2703902	ILMN_1685641	7400433	-0.000191266	0.137756	-0.278315	0.596509	0.494387	0.230938	-0.562951	0.817373	0.573469	0.959429	0.999878
BCKDHB	2914820	ILMN_1764166	2940292	3.83e-05	-0.522308	0.558917	0.503	0.46082	-1.03839	1.21287	0.29914	0.225178	0.729684	0.999878
BCKDK	3656829	ILMN_1693394	5220347	-0.000196599	-0.0704732	-0.137626	0.780723	0.217948	-0.0902665	-0.631461	0.928079	0.527739	0.98636	0.999878
BCL10	2420808	ILMN_1716446	110148	0.000658646	-1.11681	-0.501785	0.636826	0.375336	-1.75372	-1.3369	0.0795392	0.181257	0.459193	0.999878
BCL11B	3579114	ILMN_1667885	4480228	-0.000141652	0.501675	0.507469	0.876087	0.552878	0.572631	0.917868	0.56692	0.358688	0.879429	0.999878
BCL2A1	3635198	ILMN_1769229	7380477	-0.000185216	0.0995107	-0.36193	0.3474	0.384691	0.286444	-0.940833	0.77455	0.34679	0.946917	0.999878
BCL2L10	3624410	ILMN_1749096	1110576	-0.000183899	-0.129081	-1.04264	0.412126	0.485578	-0.313208	-2.14721	0.754135	0.0317769	0.941595	0.999878
BCL2L11	2500275	ILMN_1766541	1340139	0.00115585	-1.45976	-0.241489	0.633191	0.49892	-2.30541	-0.484023	0.0211842	0.62837	0.261009	0.999878
BCL2L12	3838795	ILMN_2396982	6420379	-0.000195503	0.0113585	-0.169211	0.64505	0.383881	0.0176087	-0.44079	0.985952	0.659365	0.997793	0.999878
BCL3	3835726	ILMN_1710514	6330725	0.0016357	-3.15749	-0.319664	1.04377	0.211732	-3.02507	-1.50976	0.0024983	0.131106	0.0880839	0.999878
BCL6	2709778	ILMN_1746053	5310451	-8.03e-05	0.474943	-0.296546	0.490373	0.478066	0.968534	-0.620304	0.332824	0.535058	0.756044	0.999878
BCL6B	3708223	ILMN_1651285	1260093	-0.000208294	0.246652	-0.416449	0.748666	0.448188	0.329456	-0.929185	0.741825	0.352793	0.939241	0.999878
BCL7B	3056108	ILMN_1754199	2850360	-0.000140976	0.170498	-0.179922	0.446159	0.393281	0.382145	-0.457489	0.70237	0.64732	0.928286	0.999878
BCL7C	3688038	ILMN_2371147	5260196	-0.000132997	0.321885	0.117798	0.79499	0.344729	0.404892	0.341712	0.685574	0.732568	0.923108	0.999878
BCL9	2356818	ILMN_1704452	6400619	-7.24e-05	0.852852	0.372102	0.764187	0.418784	1.11603	0.88853	0.264464	0.374256	0.705429	0.999878
BCL9L	3393993	ILMN_1743966	5960471	-9.15e-05	-1.01348	0.505074	1.28319	0.374861	-0.789813	1.34736	0.429674	0.177863	0.819398	0.999878
BCLAF1	2975680	ILMN_1690321	6760209	0.000960938	-1.62066	0.343812	0.651565	0.313012	-2.48733	1.0984	0.0129029	0.272029	0.204881	0.999878
BCMO1	3670700	ILMN_1814686	3890072	-0.000163558	-0.286682	-0.0151985	0.776674	0.533751	-0.369115	-0.0284748	0.712058	0.977283	0.931261	0.999878
BCORL1	3990616	ILMN_1767015	4070296	0.000396175	-1.63275	-0.482363	0.858867	0.388549	-1.90105	-1.24145	0.057353	0.214441	0.406543	0.999878
BCRP2	3937943	ILMN_2067334	1820446	-0.000230455	0.059186	0.0932708	0.318714	0.56395	0.185702	0.165388	0.852686	0.868638	0.967855	0.999878
BCS1L	2527939	ILMN_1738529	7100131	-0.000111834	0.22586	-0.0161051	0.522712	0.408363	0.432092	-0.0394382	0.665693	0.968541	0.917698	0.999878
BDH1	2713382	ILMN_1677637	5290553	-2.35e-05	-0.478365	-0.0271466	0.652745	0.572126	-0.732851	-0.0474487	0.463684	0.962156	0.835503	0.999878
BDH2	2780143	ILMN_1673360	4230398	-0.000198749	0.0921784	0.552483	0.386826	0.55821	0.238294	0.98974	0.811663	0.322301	0.956987	0.999878
BDKRB2	3550278	ILMN_1684086	2320719	8.87e-05	-0.886068	0.204442	0.64762	0.40103	-1.36819	0.509791	0.171314	0.610198	0.610706	0.999878
BDNF	3367231	ILMN_1809543	6760091	-8.13e-05	0.5682	0.128478	1.04211	0.563263	0.545241	0.228097	0.585612	0.819571	0.887192	0.999878
BDP1	2814527	ILMN_1687149	7570563	-0.000195206	0.0250213	0.756545	0.585029	0.438931	0.0427693	1.72361	0.965887	0.0847787	0.993932	0.999878
BECN1	3758157	ILMN_1744822	1690379	0.000500139	1.31313	-0.185695	0.774788	0.36882	1.69483	-0.503484	0.0901701	0.614624	0.481414	0.999878
BEGAIN	3579610	ILMN_1668924	360537	-0.000147557	0.34539	-0.48091	0.638641	0.555645	0.54082	-0.865498	0.588655	0.386766	0.887661	0.999878
BEND2	4001336	ILMN_2092390	3360475	0.000132919	-0.710837	0.269111	0.459921	0.482052	-1.54556	0.558262	0.122273	0.576666	0.541779	0.999878
BEND5	2411799	ILMN_1675024	2140059	-0.000198179	0.0466417	0.0944268	0.616882	0.519029	0.0756088	0.18193	0.939733	0.855638	0.989319	0.999878
BEND6	2911226	ILMN_1706969	3520164	-0.00019931	0.0181258	-0.339485	0.642094	0.614105	0.0282291	-0.552812	0.977481	0.580392	0.9974	0.999878
BEST2	3821869	ILMN_1755796	6940315	-0.000168311	0.725179	-0.0738288	0.794339	0.529599	0.912933	-0.139405	0.361321	0.88913	0.772931	0.999878
BEST4	2409820	ILMN_1796685	3370180	3.72e-05	0.857127	-0.24935	0.675094	0.453029	1.26964	-0.550406	0.204272	0.582041	0.653431	0.999878
BET1	3061651	ILMN_1684042	1510746	0.00142494	-1.28111	-0.175788	0.42616	0.410776	-3.00617	-0.42794	0.0026587	0.668695	0.0907573	0.999878
BET1L	3357723	ILMN_2060652	3130672	0.000288223	-0.883599	-1.75e-05	0.598701	0.381264	-1.47586	-4.59e-05	0.140044	0.999963	0.563429	0.999963
BFAR	3649245	ILMN_1814808	610022	0.00113104	1.77015	-0.0749892	0.660506	0.385102	2.67998	-0.194726	0.00738654	0.845608	0.156829	0.999878
BFSP1	3899111	ILMN_1712608	2370364	-0.00019515	0.0234868	-0.446882	0.649024	0.467462	0.0361879	-0.955974	0.971134	0.339085	0.995497	0.999878
BFSP2	2643095	ILMN_1690217	2690152	-0.00012716	0.463157	-0.630377	0.691706	0.550954	0.669587	-1.14416	0.503152	0.252559	0.852506	0.999878
BGN	3995633	ILMN_2206746	460767	0.000240849	-1.75656	0.552107	1.00308	0.57467	-1.75116	0.960738	0.0799799	0.336684	0.459193	0.999878
BHLHE22	3101153	ILMN_1699585	7210551	-2.68e-05	1.30318	-0.0631842	0.956671	0.435982	1.36221	-0.144924	0.173193	0.884771	0.613991	0.999878
BHLHE40	2608725	ILMN_1768534	2640735	-7.37e-05	0.598924	0.0893564	0.502883	0.169258	1.19098	0.52793	0.233717	0.597548	0.682638	0.999878
BHLHE41	3448088	ILMN_1726809	2900220	-0.000162099	0.421796	-0.333148	0.577409	0.624525	0.730497	-0.533442	0.46512	0.593728	0.835503	0.999878
BHMT	2817251	ILMN_1656638	1010463	-0.00013416	-0.275705	0.00963009	0.609287	0.439939	-0.452504	0.0218896	0.650925	0.982536	0.91211	0.999878
BHMT2	2817212	ILMN_2070521	4210075	0.000298608	1.03485	-0.400765	0.615302	0.478714	1.68186	-0.83717	0.0926571	0.402497	0.485823	0.999878
BICC1	3247818	ILMN_1719570	2760577	0.000672072	-1.24498	0.484287	0.599281	0.51887	-2.07746	0.93335	0.0378096	0.350639	0.335832	0.999878
BICD1	3410445	ILMN_1692973	60048	-0.000197295	0.00455197	0.52201	0.242677	0.492107	0.0187573	1.06077	0.985035	0.288796	0.997785	0.999878
BICD2	3214984	ILMN_2380418	6840064	-6.37e-05	-0.702619	0.046016	0.69729	0.169318	-1.00764	0.271773	0.313675	0.785797	0.741396	0.999878
BID	3951927	ILMN_2259495	5270136	0.00227601	-3.55363	-0.127895	1.04705	0.407372	-3.39394	-0.313952	0.000694254	0.753558	0.0443404	0.999878
BIK	3947604	ILMN_1770505	6280440	-0.00018693	0.269753	-0.677878	0.60253	0.511167	0.4477	-1.32614	0.654389	0.184794	0.913824	0.999878
BIN1	2574646	ILMN_1674160	5130440	-0.000198014	0.0330844	0.00197503	0.946497	0.179512	0.0349546	0.0110022	0.972117	0.991222	0.995497	0.999878
BIN2	3454841	ILMN_1726342	3310343	-0.000177036	0.191299	-0.461465	0.489587	0.257794	0.390735	-1.79005	0.696009	0.0734454	0.926437	0.999878
BIN3	3127523	ILMN_1708485	1470291	-0.000157092	0.328229	0.574446	0.731509	0.362175	0.448701	1.5861	0.653666	0.112716	0.913259	0.999878
BIN3-IT1	3127579	ILMN_1811608	7050154	-0.000115725	-0.357052	-0.306391	0.421111	0.391033	-0.847882	-0.783542	0.396544	0.433309	0.798692	0.999878
BIRC2	3346584	ILMN_2182704	7150600	0.000750307	0.876232	0.0845821	0.444256	0.21504	1.97236	0.393332	0.0486234	0.694074	0.379485	0.999878
BIRC3	3346548	ILMN_2405684	3060255	0.000422017	-0.652569	-0.0968325	0.410115	0.165542	-1.59119	-0.584943	0.11163	0.558586	0.5237	0.999878
BIRC5	3736290	ILMN_1803124	7550626	5.96e-05	0.813516	0.171548	0.767006	0.57077	1.06064	0.300555	0.288905	0.763754	0.722899	0.999878
BIRC6	2476219	ILMN_1801605	20601	-0.000153577	-0.650337	-0.00488019	1.02134	0.391524	-0.636751	-0.0124646	0.524316	0.990055	0.863942	0.999878
BIRC7	3893250	ILMN_2338849	2690441	-0.000180704	-0.226823	-0.238569	0.904972	0.47532	-0.250641	-0.501912	0.802102	0.615729	0.953218	0.999878
BIRC8	3870229	ILMN_1727144	4920563	-9.17e-05	0.506043	-0.628369	0.646687	0.631522	0.782515	-0.995008	0.433949	0.319733	0.821812	0.999878
BLID	3395198	ILMN_1807331	4250441	-0.000200597	0.156864	0.202703	0.446133	0.454366	0.351609	0.446123	0.725146	0.655508	0.935308	0.999878
BLK	3085990	ILMN_1668277	6330471	-0.000181499	-0.06879	-0.0102071	0.623207	0.188694	-0.110381	-0.0540936	0.912112	0.956861	0.981773	0.999878
BLM	3608298	ILMN_1709484	2450717	-3.8e-05	0.623262	-0.0932419	0.633791	0.501677	0.983387	-0.18586	0.325464	0.852554	0.750679	0.999878
BLNK	3301713	ILMN_2142935	3140100	-4.2e-05	-0.198344	1.01511	0.347891	0.362341	-0.570133	2.80153	0.568613	0.00508604	0.879958	0.999878
BLOC1S2	3303392	ILMN_1679782	2630743	0.000385768	-0.895431	-0.442701	0.531386	0.517617	-1.68508	-0.855269	0.0920342	0.392402	0.485643	0.999878
BLOC1S4	2717091	ILMN_1685095	6900195	-6.79e-05	-0.37876	-0.759122	0.555346	0.363313	-0.682024	-2.08944	0.495255	0.0366677	0.848708	0.999878
BLOC1S6	3592484	ILMN_1733666	1510719	0.000867773	0.871137	0.388663	0.429282	0.360774	2.02929	1.0773	0.0424812	0.281345	0.354461	0.999878
BLVRA	2999544	ILMN_1691436	2940022	7.33e-07	-0.361611	-0.495747	0.459723	0.259641	-0.786583	-1.90936	0.431563	0.056216	0.82063	0.999878
BLVRB	3862661	ILMN_1797793	6620521	0.000760793	0.464624	-0.0599288	0.24676	0.0916199	1.8829	-0.654103	0.059772	0.513045	0.414176	0.999878
BLZF1	2366490	ILMN_2106656	2940541	-8.81e-05	-0.461876	-0.158114	0.505282	0.207105	-0.914096	-0.763446	0.36071	0.445197	0.772386	0.999878
BMF	3619229	ILMN_1810239	7040356	0.000577022	-1.81898	0.511548	0.980533	0.625082	-1.85509	0.81837	0.0636412	0.413146	0.421645	0.999878
BMP10	2557948	ILMN_1791688	2120717	0.000565204	0.724528	0.121728	0.396308	0.424456	1.82819	0.286786	0.0675796	0.774276	0.430977	0.999878
BMP15	3977483	ILMN_1702755	3840600	0.000278095	0.711791	-0.35881	0.482864	0.55029	1.4741	-0.652038	0.140517	0.514377	0.563658	0.999878
BMP2	3875423	ILMN_1722718	4280577	-8.09e-05	0.379087	-0.0803778	0.495318	0.577089	0.765342	-0.139281	0.444104	0.889228	0.826566	0.999878
BMP3	2733483	ILMN_1682661	4900397	0.00030475	0.785668	0.473096	0.449742	0.456076	1.74693	1.03732	0.0807102	0.299587	0.459715	0.999878
BMP4	3565206	ILMN_1709734	4200491	-0.00016162	0.282527	-0.0122559	0.637364	0.555991	0.443274	-0.0220433	0.657587	0.982413	0.915182	0.999878
BMP5	2958172	ILMN_1660552	2000471	-0.000121462	0.596734	0.595917	0.646813	0.472944	0.922576	1.26002	0.356273	0.207664	0.76937	0.999878
BMP6	2893895	ILMN_1747650	6980064	-0.000212759	-0.0977823	-0.00736544	0.493785	0.297183	-0.198026	-0.0247842	0.843033	0.980227	0.96561	0.999878
BMP7	3910980	ILMN_1741566	3170100	-7.94e-05	0.474294	-0.539448	0.808447	0.577706	0.586673	-0.933776	0.55745	0.35042	0.876013	0.999878
BMP8A	2331511	ILMN_1761264	2760092	0.000113392	-0.425126	0.510471	0.363425	0.599612	-1.16978	0.851334	0.242146	0.394584	0.691108	0.999878
BMPER	2996563	ILMN_1702371	4780082	-0.000110234	-0.537648	-0.637549	1.03719	0.556327	-0.518372	-1.146	0.604222	0.251797	0.894311	0.999878
BMPR1A	3256074	ILMN_2095577	4290500	-0.00018601	-0.087548	0.252392	0.383	0.537493	-0.228585	0.469572	0.819201	0.638661	0.959429	0.999878
BMPR1B	2736462	ILMN_1801658	1510349	0.000657556	-1.60521	-0.537899	0.740826	0.454899	-2.16679	-1.18246	0.0302978	0.237025	0.305003	0.999878
BMPR2	2523213	ILMN_1789095	6060475	-0.00019024	-0.0595286	0.051267	0.536403	0.42905	-0.110977	0.11949	0.911639	0.904888	0.981773	0.999878
BMS1	3243708	ILMN_1772713	1190717	-0.000184715	0.19136	0.372576	0.446478	0.375616	0.4286	0.991906	0.668233	0.321244	0.91826	0.999878
BMX	3969802	ILMN_1672307	3610706	-7.47e-05	0.452497	0.119536	0.550149	0.479783	0.822499	0.249145	0.410832	0.803248	0.807195	0.999878
BNC1	3636562	ILMN_1751465	1260037	-0.000175238	0.128407	0.107814	0.76429	0.432609	0.168008	0.249219	0.866584	0.803192	0.970748	0.999878
BNC2	3200040	ILMN_1656373	7050010	0.00101673	1.17168	0.159352	0.486764	0.519504	2.40707	0.306738	0.0161167	0.759043	0.226277	0.999878
BNIP1	2841528	ILMN_2318733	6420376	3.02e-05	0.589231	-0.517026	0.562223	0.486405	1.04804	-1.06295	0.294671	0.287803	0.727437	0.999878
BNIP2	3627076	ILMN_1770803	7380136	0.000415093	-0.963154	-0.282193	0.605986	0.225698	-1.5894	-1.25031	0.112033	0.211186	0.5237	0.999878
BNIPL	2358646	ILMN_1699989	4390372	0.000497117	1.67022	-0.541357	0.770151	0.49086	2.1687	-1.10287	0.0301524	0.270082	0.304812	0.999878
BOC	2636319	ILMN_1803956	7510113	6.03e-05	-1.27444	-0.389245	1.26876	0.579338	-1.00448	-0.671878	0.315196	0.501662	0.74213	0.999878
BOD1	2887633	ILMN_1716730	3780762	-0.000141714	-0.216714	-0.0640642	0.497082	0.357548	-0.435972	-0.179177	0.662876	0.857799	0.916217	0.999878
BOD1L1	2761321	ILMN_1695856	670431	0.00165875	-1.55546	0.0159352	0.541749	0.434166	-2.87119	0.0367031	0.00410637	0.970722	0.115342	0.999878
BPESC1	2644869	ILMN_1793049	2060392	-0.000182662	-0.0891483	0.213999	0.56496	0.470526	-0.157796	0.454807	0.874624	0.649248	0.972981	0.999878
BPGM	3025500	ILMN_1788764	6290301	0.00276479	1.07052	0.804386	0.291695	0.457554	3.67	1.75801	0.000245063	0.078745	0.0244894	0.999878
BPHL	2892393	ILMN_1657746	1740487	-0.000198663	0.00281674	-0.300839	0.438352	0.464045	0.00642576	-0.648296	0.994873	0.516794	0.998436	0.999878
BPI	3884524	ILMN_1766736	4200746	0.000179426	0.353541	0.0304077	0.237174	0.173918	1.49064	0.174839	0.136119	0.861206	0.559619	0.999878
BPIFA1	3882387	ILMN_1774250	6420687	-0.000220631	0.223009	0.767089	0.566555	0.36938	0.393624	2.07669	0.693876	0.0378298	0.925835	0.999878
BPIFA2	3882304	ILMN_1762670	450133	-0.000190371	-0.0823404	-0.105228	0.572971	0.49412	-0.143708	-0.21296	0.885737	0.831358	0.975452	0.999878
BPIFA3	3882369	ILMN_1752744	5890424	-0.000142273	-0.660107	1.86239	0.828822	0.577322	-0.79644	3.22592	0.425814	0.0012557	0.817052	0.999878
BPIFA4P	3882343	ILMN_1787830	1770215	0.000522611	1.19648	-0.225561	0.654277	0.392006	1.82871	-0.575401	0.0675027	0.56502	0.430977	0.999878
BPIFB1	3882413	ILMN_1733904	1990142	-0.000127687	-0.44479	0.388166	0.908947	0.450559	-0.489347	0.861521	0.624618	0.388951	0.904012	0.999878
BPIFB2	3882190	ILMN_1796928	3830491	-6.11e-05	-1.19451	-0.172979	1.14609	0.439804	-1.04225	-0.39331	0.297348	0.69409	0.729057	0.999878
BPIFB3	3882241	ILMN_1750365	7100075	-0.000176767	0.185422	-0.13862	0.821229	0.498666	0.225785	-0.277982	0.821377	0.781026	0.960215	0.999878
BPIFB4	3882265	ILMN_1703839	1690201	-0.000193072	0.206559	0.168704	0.917889	0.484098	0.225037	0.348491	0.82196	0.727471	0.960215	0.999878
BPIFB6	3882214	ILMN_1670091	6110184	-0.000140912	0.306794	-0.191409	0.708118	0.477321	0.433253	-0.401008	0.664849	0.688414	0.917503	0.999878
BPIFC	3958422	ILMN_1708152	4010392	-0.000102185	-0.821096	0.283336	0.781596	0.571368	-1.05054	0.495891	0.293521	0.619971	0.727094	0.999878
BPNT1	2456805	ILMN_1712718	5360039	-0.000147733	0.149965	0.266833	0.510847	0.465379	0.293561	0.573368	0.769106	0.566396	0.945095	0.999878
BRAF	3076340	ILMN_1652472	7210202	0.000863443	1.74448	-0.316688	0.759452	0.532406	2.29703	-0.594824	0.0216579	0.551961	0.261763	0.999878
BRCA2	3484641	ILMN_1677794	1570327	-0.000135721	-0.803471	-0.00148604	0.741865	0.54528	-1.08304	-0.00272528	0.278842	0.997826	0.716427	0.999878
BRCC3	3996755	ILMN_1697546	4230259	-0.000192865	0.0374767	-1.05194	0.302459	0.451012	0.123907	-2.33241	0.901394	0.0196793	0.979623	0.999878
BRD1	3965314	ILMN_1730019	1440450	-9.1e-05	-0.673361	0.145299	0.979682	0.411859	-0.687326	0.352789	0.491909	0.724247	0.846303	0.999878
BRD3	3229042	ILMN_1785635	6660626	0.00065408	-1.94107	0.0148256	0.998207	0.233976	-1.94456	0.063364	0.0518839	0.949477	0.389874	0.999878
BRD7P3	2923257	ILMN_2147920	70736	0.000155536	-0.250116	-0.681557	0.172258	0.447614	-1.45199	-1.52265	0.146567	0.127847	0.57357	0.999878
BRDT	2346575	ILMN_2247703	6130463	7.54e-05	-1.45978	-0.0647732	1.08161	0.568361	-1.34963	-0.113965	0.177195	0.909266	0.620699	0.999878
BRE	2474791	ILMN_2363489	1400450	-0.000109291	-0.36739	0.0747476	0.714747	0.346356	-0.514014	0.215812	0.607264	0.829135	0.895239	0.999878
BRF2	3131720	ILMN_1665554	20500	2.01e-05	0.777975	-0.344103	0.696338	0.415528	1.11724	-0.828109	0.263946	0.407609	0.705066	0.999878
BRI3	3014229	ILMN_1781580	6270095	0.00170892	-1.47519	-0.116522	0.481985	0.192574	-3.06065	-0.605079	0.00222023	0.545126	0.0841312	0.999878
BRICD5	3676610	ILMN_1759411	60220	-0.000115578	0.676918	-0.233615	0.849231	0.423537	0.797095	-0.551581	0.425433	0.581236	0.817052	0.999878
BRIP1	3765580	ILMN_1760757	5960730	-8.14e-05	0.355381	0.0229447	0.454239	0.462345	0.782366	0.0496268	0.434036	0.96042	0.821812	0.999878
BRIX1	2806231	ILMN_2155172	1110722	-3.67e-05	-0.405047	-0.116705	0.561967	0.364471	-0.720766	-0.320204	0.471087	0.748814	0.837675	0.999878
BRK1	2610317	ILMN_1764500	2000546	0.000400408	0.833699	0.690029	0.492222	0.23636	1.69375	2.9194	0.0903751	0.00350709	0.481476	0.999878
BRMS1L	3532560	ILMN_1775943	3140039	0.000448266	0.98688	-0.0965755	0.462398	0.468791	2.13426	-0.20601	0.0328693	0.836783	0.316504	0.999878
BRPF1	2609870	ILMN_1669308	3130138	-6.09e-05	0.890771	-0.155753	0.832764	0.374678	1.06966	-0.415698	0.284825	0.677631	0.720461	0.999878
BRS3	3992512	ILMN_1756165	1230541	-0.000115586	-0.596144	0.336548	0.480981	0.575871	-1.23943	0.584415	0.215243	0.558941	0.66349	0.999878
BRSK1	3842059	ILMN_2185845	2000110	-2.11e-05	1.13563	-0.0244534	1.39709	0.233429	0.812857	-0.104758	0.416339	0.916568	0.810764	0.999878
BRWD1-IT2	3932261	ILMN_2202320	3290575	-0.000200964	0.0163258	0.838477	0.26999	0.492922	0.0604682	1.70103	0.951785	0.0889367	0.991925	0.999878
BSDC1	2405036	ILMN_1734483	3370450	0.000386363	1.8837	0.0477819	1.07138	0.317653	1.7582	0.150422	0.0787748	0.880432	0.457696	0.999878
BSG	3815014	ILMN_1730709	4850372	0.00109572	0.768026	-0.642649	0.296455	0.589056	2.5907	-1.09098	0.00960574	0.275281	0.180014	0.999878
BSN	2622153	ILMN_1760246	3850730	-0.000183893	-0.0984521	0.104866	1.17625	0.585138	-0.0837002	0.179216	0.933298	0.857768	0.98753	0.999878
BSND	2337392	ILMN_1726420	3440435	-5.02e-05	0.855107	-0.0266288	0.5852	0.562069	1.46122	-0.0473764	0.144017	0.962213	0.570294	0.999878
BST1	2719617	ILMN_1770161	6270681	0.000545838	-1.13599	-0.458851	0.518537	0.294664	-2.19077	-1.5572	0.0285144	0.119423	0.3005	0.999878
BST2	3854454	ILMN_1723480	4900674	0.000545649	-0.779884	-0.0312493	0.40324	0.162679	-1.93404	-0.192092	0.0531636	0.84767	0.394888	0.999878
BTAF1	3257938	ILMN_1676842	2070209	0.000537196	-1.61403	0.0174968	0.800553	0.216108	-2.01614	0.0809633	0.0438379	0.935471	0.360825	0.999878
BTBD1	3636470	ILMN_2411264	4230528	0.000148899	1.23136	-0.105434	0.828137	0.350954	1.4869	-0.30042	0.137103	0.763857	0.559913	0.999878
BTBD16	3268222	ILMN_1677684	5690102	-0.000179057	0.151744	-0.563667	0.973957	0.586386	0.155801	-0.961256	0.876196	0.336423	0.972981	0.999878
BTBD3	3876645	ILMN_1666653	4900687	-0.000221159	-0.122982	-0.302587	0.599477	0.495394	-0.205149	-0.610801	0.837464	0.541332	0.964766	0.999878
BTBD6	3554592	ILMN_1744725	6900307	-7.29e-05	0.367177	0.436764	0.371029	0.338948	0.989617	1.28859	0.322409	0.197542	0.748048	0.999878
BTBD8	2346657	ILMN_2049900	2000347	0.00132932	-1.31592	-0.192494	0.528382	0.492283	-2.49048	-0.391022	0.0127891	0.695781	0.203847	0.999878
BTBD9	2952497	ILMN_1732271	5560273	0.000791962	-1.43928	-0.403528	0.698306	0.481396	-2.0611	-0.838245	0.0393447	0.401893	0.340837	0.999878
BTC	2773545	ILMN_2081070	4280131	0.000490808	-1.0504	0.0770921	0.643323	0.470843	-1.63278	0.163732	0.102578	0.869942	0.50555	0.999878
BTD	2612401	ILMN_1699728	1410091	0.000276777	-0.787186	-0.410293	0.618324	0.443263	-1.2731	-0.925619	0.203043	0.354644	0.652266	0.999878
BTF3	2815331	ILMN_1659762	7330630	-0.000207061	-0.249023	0.140326	0.500101	0.137825	-0.497947	1.01815	0.618543	0.308608	0.900501	0.999878
BTF3L4	2336271	ILMN_1759359	5490730	0.000362721	0.52483	-0.315474	0.35872	0.326485	1.46306	-0.966274	0.143512	0.333907	0.569419	0.999878
BTG1	3465409	ILMN_1775743	4730369	0.000451595	1.13055	0.0529443	0.660071	0.135097	1.71277	0.391898	0.0868158	0.695133	0.473852	0.999878
BTG2	2375664	ILMN_1770085	1010487	0.000720014	-1.23326	-0.0755245	0.58094	0.196046	-2.12287	-0.385239	0.0338135	0.70006	0.321113	0.999878
BTG3	3926080	ILMN_2154836	7210605	-0.000155784	0.272882	0.263872	0.475859	0.417318	0.573452	0.632303	0.566364	0.527189	0.879064	0.999878
BTG4	3390949	ILMN_1689154	110220	-0.000200671	-0.021785	0.227594	0.456724	0.506967	-0.0476983	0.448932	0.961959	0.653481	0.993051	0.999878
BTK	4015709	ILMN_1662026	6380161	0.000223872	-0.829088	-0.290794	0.540124	0.275538	-1.535	-1.05537	0.124848	0.291257	0.542836	0.999878
BTLA	2688717	ILMN_1778536	2450494	0.000999232	-0.939848	-0.0222622	0.375314	0.367862	-2.50416	-0.0605179	0.0123055	0.951743	0.200109	0.999878
BTN1A1	2899473	ILMN_1698953	7400112	-0.000130304	-0.248468	-0.403548	0.597463	0.444476	-0.415871	-0.907919	0.677522	0.363921	0.921045	0.999878
BTN2A1	2899437	ILMN_2364852	2570477	-9.88e-05	0.325292	-0.00645801	0.590053	0.228941	0.551293	-0.0282082	0.581457	0.977496	0.885563	0.999878
BTN2A3P	2899393	ILMN_1721813	4210598	0.000263177	0.821917	0.813158	0.51152	0.468175	1.60681	1.73687	0.108158	0.0824107	0.518212	0.999878
BTN3A1	2899372	ILMN_1802708	3130600	-0.000125728	0.24446	0.0939357	0.479115	0.182213	0.510232	0.515527	0.609911	0.606185	0.895968	0.999878
BTN3A3	2899413	ILMN_2373831	1430717	0.000480903	0.844936	-0.198291	0.451723	0.271774	1.87048	-0.729617	0.0614758	0.465625	0.417968	0.999878
BTNL3	2844888	ILMN_1783795	1470102	-0.000181427	-0.0287709	-0.124515	0.28663	0.176442	-0.100376	-0.705699	0.920049	0.480375	0.983552	0.999878
BTNL8	4047607	ILMN_1676895	5860551	-0.000171841	0.107455	-0.129664	0.204859	0.300908	0.524534	-0.43091	0.59993	0.666534	0.89304	0.999878
BTNL9	2844908	ILMN_1772976	2060364	0.000105943	1.25511	0.183913	1.05402	0.611485	1.19078	0.300765	0.233797	0.763594	0.682638	0.999878
BTRC	3261165	ILMN_1689438	1440497	0.000871729	1.48341	0.53055	0.668233	0.493515	2.2199	1.07504	0.0264699	0.282355	0.292472	0.999878
BUB1	2570616	ILMN_2202948	2070224	0.000589171	1.38564	-0.000630195	0.741856	0.472989	1.8678	-0.00133237	0.0618473	0.998937	0.419865	0.999878
BUB3	3268669	ILMN_1778764	2100594	-0.000160585	-0.241913	-0.513523	0.699248	0.310328	-0.345962	-1.65478	0.729386	0.0979699	0.936945	0.999878
BUD13	3392840	ILMN_1749210	50487	-0.000198341	0.310388	-0.127515	0.720374	0.473572	0.430871	-0.269263	0.666581	0.787727	0.917857	0.999878
BUD31	3014742	ILMN_1710697	4490706	-0.000165765	0.180376	0.0514456	0.603552	0.280117	0.298858	0.183658	0.765061	0.854282	0.944376	0.999878
BVES	2967249	ILMN_1702107	540241	-0.000147748	0.210981	0.469446	0.35123	0.450434	0.60069	1.04221	0.548073	0.297314	0.872847	0.999878
BYSL	2906990	ILMN_1682792	4860356	-0.000211206	-0.0645925	-0.723589	0.418037	0.415045	-0.154514	-1.7434	0.877211	0.0812636	0.973064	0.999878
C10ORF11	3252690	ILMN_1783247	650743	-9.22e-05	-0.383468	-0.367038	0.517876	0.319151	-0.740463	-1.15005	0.459054	0.250125	0.833637	0.999878
C10ORF12	3259703	ILMN_1665508	4230392	0.000259404	0.587442	0.464081	0.424995	0.393852	1.38223	1.17831	0.166962	0.238671	0.607111	0.999878
C10ORF2	3260937	ILMN_1701243	2190538	-0.000197	-0.241528	0.217768	0.713892	0.422182	-0.338326	0.515816	0.735132	0.605983	0.938309	0.999878
C10ORF25	3286792	ILMN_2231921	4760148	-0.000150168	-0.333673	0.769772	0.499068	0.472968	-0.668592	1.62753	0.503787	0.103624	0.852711	0.999878
C10ORF35	3250438	ILMN_1662470	2510253	-0.000163971	-0.396839	-0.532922	0.654996	0.421881	-0.605865	-1.26321	0.544632	0.206515	0.871083	0.999878
C10ORF54	3293724	ILMN_2205963	6620292	-8.28e-05	-0.560981	0.254463	0.85142	0.172268	-0.658876	1.47714	0.510005	0.139638	0.8575	0.999878
C10ORF62	3259959	ILMN_1720898	6560364	-0.00017362	0.258929	0.347868	0.67922	0.535757	0.381216	0.649302	0.703059	0.516143	0.928286	0.999878
C10ORF67	3281358	ILMN_1719577	4850762	-0.000190552	0.199542	0.0356942	0.553401	0.439552	0.360573	0.0812059	0.718434	0.935278	0.933064	0.999878
C10ORF76	3304116	ILMN_1792110	730593	-0.000120424	-0.259558	-0.0857527	0.561962	0.433801	-0.461879	-0.197677	0.644188	0.843298	0.911399	0.999878
C10ORF82	3308378	ILMN_1782861	2120315	-0.000198762	-0.0716672	0.348631	0.60166	0.392476	-0.119116	0.888287	0.905188	0.374387	0.980219	0.999878
C10ORF88	3310725	ILMN_1775423	3440181	-0.000169606	-0.268531	-0.745862	0.458203	0.406172	-0.586051	-1.83632	0.557867	0.0663101	0.87627	0.999878
C10ORF90	3312045	ILMN_1680367	4560470	-0.000153221	-0.379124	0.10653	0.674389	0.54389	-0.562175	0.195867	0.574022	0.844714	0.882485	0.999878
C10ORF91	3272148	ILMN_2183519	7210291	-0.000160103	-0.211397	0.139461	0.507361	0.628107	-0.41666	0.222033	0.676945	0.824288	0.921045	0.999878
C10ORF95	3304385	ILMN_1797104	1300735	0.000124762	-0.488379	-0.44972	0.569939	0.609421	-0.856897	-0.737946	0.391543	0.460547	0.795765	0.999878
C10ORF99	3255284	ILMN_1802192	4250092	0.000643638	-1.45095	0.44816	0.566595	0.599071	-2.56082	0.748093	0.0104714	0.454404	0.183937	0.999878
C11ORF1	3348748	ILMN_2128967	610400	0.000695149	-0.835211	-0.0547976	0.426263	0.326097	-1.95938	-0.168041	0.0501236	0.866551	0.384461	0.999878
C11ORF16	3362096	ILMN_1708304	670543	0.000102608	1.02018	-0.312091	0.725529	0.608388	1.40612	-0.512979	0.159749	0.607966	0.597262	0.999878
C11ORF24	3379452	ILMN_1808163	6110348	0.000267044	-0.857926	0.461215	0.565816	0.429668	-1.51626	1.07342	0.129516	0.283083	0.551158	0.999878
C11ORF30	3340913	ILMN_1812134	6980725	0.00350452	3.07439	0.821223	0.788671	0.49824	3.89819	1.64825	9.82e-05	0.0993017	0.0159863	0.999878
C11ORF31	3331603	ILMN_1786872	50360	9.53e-05	-0.593819	-0.554215	0.570081	0.540134	-1.04164	-1.02607	0.297629	0.304859	0.729057	0.999878
C11ORF40	3360182	ILMN_1673982	110477	-0.000144013	0.312896	-0.692393	0.523521	0.479701	0.597675	-1.44338	0.550083	0.148912	0.873817	0.999878
C11ORF42	3318595	ILMN_1729842	6580167	-4.78e-06	-0.247033	-0.0537349	0.410057	0.565124	-0.602437	-0.0950851	0.54691	0.924247	0.872255	0.999878
C11ORF44	3356417	ILMN_1803015	4250386	9.08e-05	0.340003	0.318496	0.302636	0.575635	1.12347	0.553294	0.261291	0.580062	0.70368	0.999878
C11ORF45	3397792	ILMN_1680102	7570025	-0.000201804	0.0556269	0.0488186	0.936339	0.632516	0.0594089	0.0771816	0.952629	0.938479	0.991925	0.999878
C11ORF48	3375999	ILMN_1739345	7100280	-0.000179798	0.119848	0.0408837	0.26062	0.294432	0.459858	0.138856	0.645638	0.889564	0.911399	0.999878
C11ORF49	3329537	ILMN_1796440	7160673	-0.000185122	-0.162765	0.0912485	0.791975	0.516707	-0.205518	0.176596	0.837176	0.859826	0.964766	0.999878
C11ORF53	3348353	ILMN_1674017	3400484	-3.51e-06	-0.883592	0.45498	0.546747	0.524867	-1.61609	0.866849	0.106138	0.386025	0.514673	0.999878
C11ORF54	3344861	ILMN_2213297	2470463	-9.04e-05	-0.442863	-0.350622	0.574991	0.373816	-0.770209	-0.937953	0.441212	0.348269	0.825557	0.999878
C11ORF57	3348891	ILMN_1728965	870154	-0.000187857	0.146317	0.200776	0.592222	0.381802	0.247065	0.525864	0.804868	0.598983	0.954191	0.999878
C11ORF63	3353441	ILMN_2243516	1740767	-6.77e-05	0.639072	-0.109657	0.680734	0.190736	0.938799	-0.574914	0.347879	0.565349	0.763977	0.999878
C11ORF65	3390143	ILMN_2045800	620246	-0.000192663	-0.673112	-0.530984	0.606751	0.603477	-1.10937	-0.879873	0.267323	0.378928	0.707207	0.999878
C11ORF68	3378007	ILMN_1757847	4050446	0.000949425	-1.47855	0.2264	0.608438	0.378626	-2.43007	0.597953	0.0151304	0.549872	0.218699	0.999878
C11ORF71	3392044	ILMN_2049693	1230543	-4.13e-05	0.455765	-0.442412	0.547373	0.444169	0.83264	-0.996043	0.405087	0.319229	0.804402	0.999878
C11ORF73	3343252	ILMN_1781419	780440	-9.34e-05	-0.280702	0.173131	0.445322	0.376489	-0.630336	0.459856	0.528503	0.64562	0.865986	0.999878
C11ORF80	3336486	ILMN_1790637	5690463	-0.00021556	0.1621	-0.469141	0.549052	0.399851	0.295235	-1.17329	0.767826	0.24068	0.944988	0.999878
C11ORF82	3342426	ILMN_1790100	2570019	-0.000151603	-0.494009	-0.373716	0.560889	0.393103	-0.880761	-0.950683	0.378489	0.341765	0.78612	0.999878
C11ORF88	3348551	ILMN_1766038	840465	0.00116205	-1.50606	-0.248812	0.543824	0.497447	-2.76939	-0.500177	0.00563677	0.61695	0.140628	0.999878
C11ORF92	3390852	ILMN_1727178	3310739	-0.000165331	0.194106	-0.228061	0.499863	0.599724	0.388318	-0.380277	0.697797	0.70374	0.926738	0.999878
C12ORF10	3415937	ILMN_1777765	1260022	0.00019762	1.02568	0.128503	0.799556	0.223392	1.28281	0.575235	0.199619	0.565133	0.649277	0.999878
C12ORF23	3430389	ILMN_1804611	3290379	-0.00019916	-0.102711	-0.309801	0.456084	0.419539	-0.225203	-0.738432	0.821831	0.460252	0.960215	0.999878
C12ORF29	3425108	ILMN_1792671	110240	0.000610643	0.655371	0.159293	0.394457	0.337669	1.66145	0.471743	0.0966849	0.637111	0.492958	0.999878
C12ORF36	3445252	ILMN_1755414	4120240	0.000200012	0.386772	0.528801	0.371691	0.497417	1.04057	1.06309	0.298123	0.287739	0.729057	0.999878
C12ORF39	3407849	ILMN_1763311	1820671	0.000314689	0.679141	0.606664	0.404092	0.601682	1.68066	1.00828	0.0928909	0.31332	0.485823	0.999878
C12ORF4	3441215	ILMN_1751898	6420551	7.56e-05	-0.576315	-0.151143	0.559763	0.425986	-1.02957	-0.354809	0.303261	0.722733	0.731964	0.999878
C12ORF40	3411234	ILMN_1722880	3180279	-0.000152173	0.339699	0.229505	1.00745	0.596325	0.337187	0.384865	0.73599	0.700338	0.938404	0.999878
C12ORF43	3474815	ILMN_1737818	50414	0.000387765	0.917369	0.146241	0.663953	0.408741	1.38168	0.357784	0.167132	0.720505	0.607342	0.999878
C12ORF44	3415273	ILMN_1772527	1780367	2.99e-05	-0.879344	0.941069	0.664605	0.384358	-1.32311	2.44842	0.185859	0.0143486	0.635512	0.999878
C12ORF49	3473331	ILMN_2161556	3170102	-0.000173135	0.128781	-0.142841	0.431016	0.500118	0.298786	-0.285615	0.765116	0.775173	0.944376	0.999878
C12ORF5	3401756	ILMN_1791792	2350762	-0.000202697	-0.118554	0.294822	0.417641	0.404275	-0.283865	0.729259	0.776525	0.465843	0.946917	0.999878
C12ORF50	3464589	ILMN_1715567	4120541	-0.000197481	-0.00966486	-0.299731	0.728555	0.463589	-0.0132658	-0.646544	0.989416	0.517927	0.997984	0.999878
C12ORF52	3432641	ILMN_1667857	4900753	0.000240785	-1.17956	0.256399	0.71205	0.401848	-1.65657	0.638051	0.0976691	0.52344	0.494086	0.999878
C12ORF54	3413495	ILMN_1675616	4570747	0.000238178	-0.768202	-0.488969	0.527905	0.443013	-1.45519	-1.10373	0.145679	0.269708	0.572352	0.999878
C12ORF57	3403077	ILMN_1812191	3130291	5.77e-05	-0.572232	-0.145	0.454139	0.150655	-1.26004	-0.962463	0.207714	0.335817	0.657315	0.999878
C12ORF61	3459579	ILMN_1773927	3170608	0.00132628	-2.43334	-0.540429	0.85247	0.611605	-2.85446	-0.883625	0.00432857	0.376899	0.118544	0.999878
C12ORF65	3435752	ILMN_1667510	2320392	-0.000217513	0.129555	-0.245761	0.602519	0.355828	0.215023	-0.690673	0.829758	0.489771	0.963024	0.999878
C12ORF66	3459956	ILMN_1736995	5090025	0.000425931	-1.21479	-0.429653	0.616248	0.545058	-1.97126	-0.78827	0.0487482	0.430539	0.379485	0.999878
C12ORF75	3429857	ILMN_1716382	5810743	-0.00014157	0.225407	0.311414	0.340396	0.222381	0.662192	1.40036	0.507878	0.161405	0.856322	0.999878
C12ORF76	3471073	ILMN_1753265	6110215	-0.000208385	-0.358284	0.797748	0.606286	0.426104	-0.590949	1.87219	0.554581	0.0611799	0.875134	0.999878
C13ORF35	3502149	ILMN_1759486	1980537	-9.06e-05	-0.41491	-0.267502	0.555526	0.616917	-0.746878	-0.433611	0.455172	0.664571	0.832714	0.999878
C14ORF105	3566383	ILMN_1807667	5340070	-0.00015818	-0.412201	0.535289	0.670756	0.38712	-0.614531	1.38275	0.538892	0.166742	0.869791	0.999878
C14ORF132	3550234	ILMN_1713744	730358	-0.000167505	-0.171751	-0.585644	0.585445	0.443715	-0.293368	-1.31986	0.769253	0.18688	0.945095	0.999878
C14ORF142	3577256	ILMN_1685781	610523	0.000642795	0.607823	-0.186117	0.287084	0.302602	2.11723	-0.615055	0.0342893	0.538519	0.32356	0.999878
C14ORF166	3535674	ILMN_1696708	3290689	-0.000166581	0.395623	-0.320516	0.379304	0.266761	1.04302	-1.20151	0.296988	0.229553	0.729057	0.999878
C14ORF166B	3545183	ILMN_2114190	6020722	-0.000259405	-0.526312	0.0222415	0.948378	0.561988	-0.55496	0.0395765	0.578946	0.968431	0.883987	0.999878
C14ORF177	3551029	ILMN_1728272	6940044	-0.000172274	-0.185652	0.0743547	0.571663	0.552646	-0.324757	0.134543	0.745379	0.892973	0.939646	0.999878
C14ORF2	3580947	ILMN_1652722	2100341	0.000419917	-0.708088	-0.0476121	0.445617	0.294624	-1.58901	-0.161603	0.112122	0.871618	0.5237	0.999878
C14ORF37	3566495	ILMN_2138745	2690717	-0.00011953	-0.416075	-0.0632398	0.458629	0.408932	-0.907214	-0.154646	0.364337	0.8771	0.775802	0.999878
C14ORF39	3567243	ILMN_2185072	7160301	-0.000152232	0.199797	-0.0238801	0.902357	0.649379	0.221417	-0.0367738	0.824777	0.970665	0.961228	0.999878
C14ORF79	3554523	ILMN_1686082	3180445	-0.000105371	-0.327564	-1.31576	0.63417	0.549522	-0.516523	-2.39438	0.605512	0.0166486	0.894891	0.999878
C14ORF93	3557017	ILMN_1724897	4610484	6.98e-05	-0.725344	-0.335413	0.767008	0.387707	-0.94568	-0.865118	0.344357	0.386974	0.762979	0.999878
C15ORF26	3604267	ILMN_1686373	4490278	3.36e-07	0.513248	-0.0250405	0.613702	0.431181	0.836316	-0.0580742	0.403017	0.95369	0.803102	0.999878
C15ORF27	3602569	ILMN_1808956	6580008	6.92e-05	-0.862403	0.206241	0.826323	0.498365	-1.04366	0.413835	0.296691	0.678995	0.729057	0.999878
C15ORF32	3609007	ILMN_1773848	5490243	-0.000146613	-0.150122	0.580303	0.487082	0.43276	-0.308207	1.34093	0.757938	0.179942	0.942436	0.999878
C15ORF37	3603840	ILMN_1768855	130376	0.000240565	-0.617181	0.529434	0.458109	0.583794	-1.34724	0.906885	0.177964	0.364468	0.622284	0.999878
C15ORF40	3636442	ILMN_1660585	3130133	-0.000187146	-0.103705	0.422892	0.549393	0.397953	-0.188764	1.06267	0.850286	0.287933	0.966675	0.999878
C15ORF43	3592172	ILMN_1791376	4760204	0.000433109	-0.909423	0.970176	0.541106	0.459267	-1.68067	2.11244	0.0928885	0.0346486	0.485823	0.999878
C15ORF53	3589290	ILMN_1698363	6400348	-0.000197625	0.00557884	0.0579956	0.479714	0.482162	0.0116295	0.120282	0.990722	0.904259	0.997984	0.999878
C15ORF57	3619479	ILMN_1811264	5960014	-0.000185972	-0.122739	-0.104431	0.472501	0.275553	-0.259764	-0.378988	0.795056	0.704697	0.951194	0.999878
C16ORF11	3642993	ILMN_2185427	1030170	0.000353115	-2.20754	0.205206	1.13299	0.436505	-1.94841	0.470111	0.051421	0.638276	0.388423	0.999878
C16ORF3	3705170	ILMN_1806189	2750008	-0.000159888	-0.12911	-0.22003	0.350858	0.576833	-0.367982	-0.381445	0.712902	0.702873	0.931813	0.999878
C16ORF46	3701433	ILMN_1667665	70152	0.000543578	1.10257	0.434035	0.619575	0.473042	1.77956	0.91754	0.0752088	0.35886	0.449314	0.999878
C16ORF52	3652271	ILMN_1717324	60243	0.000220638	-0.797644	-0.398917	0.402259	0.424925	-1.98291	-0.938795	0.0474315	0.347836	0.375772	0.999878
C16ORF54	3687232	ILMN_1751061	6290458	1.16e-05	-0.661943	0.571498	0.641211	0.355407	-1.03233	1.60801	0.301966	0.107832	0.731548	0.999878
C16ORF62	3651057	ILMN_1729450	1170719	0.000792985	1.70918	-0.272448	0.717065	0.462059	2.38358	-0.589639	0.0171821	0.555432	0.233852	0.999878
C16ORF70	3665161	ILMN_1711703	4670520	0.000360363	-1.12591	-0.72985	0.719584	0.506996	-1.56466	-1.43956	0.117725	0.149992	0.533611	0.999878
C16ORF71	3646366	ILMN_1683370	1090767	-0.000210814	-0.187636	-0.893533	1.06397	0.609169	-0.176355	-1.46681	0.860022	0.142429	0.968892	0.999878
C16ORF72	3647632	ILMN_1773407	3180450	0.000143668	-1.069	0.281181	0.867296	0.27758	-1.23257	1.01297	0.217795	0.311073	0.665158	0.999878
C16ORF74	3703129	ILMN_1806149	3930152	-0.000102054	0.690696	0.343547	0.794279	0.466163	0.869589	0.736967	0.384566	0.461142	0.790963	0.999878
C16ORF78	3659691	ILMN_2137003	5360288	-0.000207489	0.0832058	-0.143308	0.612493	0.467557	0.135848	-0.306505	0.891947	0.75922	0.976339	0.999878
C16ORF80	3693511	ILMN_2112599	5360630	0.000692689	0.854544	-0.668697	0.472614	0.344049	1.80812	-1.94361	0.0706475	0.051942	0.437913	0.999878
C16ORF82	3654084	ILMN_1795662	1980100	0.000224278	1.16884	-0.675474	0.743368	0.581217	1.57236	-1.16217	0.115931	0.245166	0.530845	0.999878
C16ORF87	3690034	ILMN_1690911	1010575	-0.000154075	0.23534	-0.0976114	0.362964	0.427946	0.648385	-0.228093	0.516765	0.819574	0.860594	0.999878
C16ORF89	3678542	ILMN_1676222	6590386	-0.000194429	0.310078	0.219489	0.959116	0.479119	0.323295	0.458109	0.746485	0.646874	0.939791	0.999878
C17ORF102	3753275	ILMN_1778382	1570730	-0.000126354	0.210363	-0.169738	0.476728	0.429584	0.441265	-0.395123	0.65904	0.692752	0.91519	0.999878
C17ORF103	3749795	ILMN_1661735	4220079	0.000654586	-0.995693	0.862305	0.581657	0.406151	-1.71182	2.12312	0.0869914	0.0337441	0.473852	0.999878
C17ORF47	3764581	ILMN_1688703	5890367	-0.000130931	0.159552	0.054278	0.532938	0.464841	0.299381	0.116767	0.764661	0.907045	0.944376	0.999878
C17ORF49	3708201	ILMN_1763688	2570035	-5.56e-05	0.497239	-0.00917335	0.455517	0.207781	1.09159	-0.0441491	0.275065	0.964786	0.713876	0.999878
C17ORF50	3718775	ILMN_1765645	6290286	-0.00019792	-0.0960373	0.668337	0.741574	0.448418	-0.129505	1.49043	0.896964	0.13611	0.978141	0.999878
C17ORF53	3722770	ILMN_1776490	4570224	-0.000194581	0.0319672	0.203355	1.00312	0.454603	0.0318678	0.447325	0.974579	0.65464	0.996324	0.999878
C17ORF59	3744254	ILMN_2225746	6400114	0.000273092	-0.750893	-0.594813	0.480811	0.41036	-1.56172	-1.44949	0.118417	0.1472	0.534249	0.999878
C17ORF64	3729501	ILMN_1717579	6370600	-0.000193235	0.11251	-0.361133	0.617539	0.501472	0.182191	-0.720146	0.85544	0.471435	0.968425	0.999878
C17ORF66	3753833	ILMN_1675097	2640504	0.000152435	1.08909	-0.211468	0.838346	0.529335	1.29909	-0.399498	0.193972	0.689526	0.643192	0.999878
C17ORF70	3773980	ILMN_1711823	4540064	-0.000154474	0.495486	0.0782338	1.18472	0.250214	0.418231	0.312667	0.675796	0.754534	0.920956	0.999878
C17ORF74	3708602	ILMN_1810107	6350326	-0.000115853	-0.389939	0.0473873	0.67659	0.473994	-0.576329	0.0999745	0.564419	0.920365	0.878129	0.999878
C17ORF75	3752611	ILMN_1797155	5900360	-0.000154	0.23734	-0.116119	0.480922	0.348952	0.493511	-0.332764	0.621673	0.739312	0.902767	0.999878
C17ORF78	3719456	ILMN_1806330	840753	-0.000135187	0.157849	0.030096	0.249701	0.427633	0.632149	0.070378	0.527318	0.943893	0.865221	0.999878
C17ORF82	3730001	ILMN_1783682	2070360	-0.000170303	-0.192201	-0.632152	0.558561	0.488365	-0.3441	-1.29442	0.730785	0.195519	0.936945	0.999878
C17ORF85	3741668	ILMN_2221076	3180343	0.00112038	1.60543	-0.366149	0.597795	0.417107	2.68558	-0.877829	0.00726409	0.380036	0.156554	0.999878
C17ORF99	3736204	ILMN_1911047	6660543	-4e-05	0.60266	-0.369483	0.820109	0.467047	0.734853	-0.791105	0.462463	0.428883	0.835503	0.999878
C18ORF21	3784670	ILMN_1805998	450070	-0.000198185	-0.00183266	-0.203399	0.418112	0.378976	-0.00438319	-0.536707	0.996503	0.59147	0.998741	0.999878
C18ORF25	3787031	ILMN_1801822	1410563	-2.15e-05	0.526485	-0.105204	0.499598	0.25199	1.05382	-0.417492	0.292017	0.676319	0.725514	0.999878
C18ORF56	3795850	ILMN_1796074	1450682	0.000373927	1.49629	0.109808	0.840668	0.566598	1.77988	0.193802	0.0751561	0.846331	0.449222	0.999878
C18ORF8	3781734	ILMN_1719097	1470170	0.000426482	1.32677	0.0544546	0.663291	0.347155	2.00029	0.15686	0.0455229	0.875356	0.366548	0.999878
C19ORF10	3846900	ILMN_1787844	1030458	-9.01e-05	-0.487173	-0.231964	0.670672	0.2752	-0.726396	-0.842891	0.46763	0.399289	0.836177	0.999878
C19ORF12	3857811	ILMN_1703695	6370377	0.000274278	-0.845533	0.00590034	0.553296	0.237103	-1.52817	0.0248852	0.126532	0.980147	0.546295	0.999878
C19ORF18	3872584	ILMN_1785933	6480397	-0.00012775	0.331664	0.294105	0.548363	0.588498	0.604826	0.499755	0.545322	0.617247	0.871618	0.999878
C19ORF24	3815685	ILMN_1678052	10189	-0.000192306	0.076796	-0.113524	0.52022	0.394987	0.147622	-0.287413	0.882647	0.773796	0.974585	0.999878
C19ORF25	3845210	ILMN_1655225	6520113	-0.000193407	0.195552	-0.414996	0.717525	0.385435	0.272537	-1.07669	0.785221	0.281617	0.948562	0.999878
C19ORF26	3845081	ILMN_1780504	2490332	1.84e-05	-1.54763	0.144993	1.12849	0.347771	-1.37142	0.416922	0.170306	0.676736	0.609905	0.999878
C19ORF33	3832280	ILMN_1717793	630470	-0.000164807	0.172627	0.947237	0.657856	0.354215	0.262408	2.67419	0.793017	0.0074911	0.950434	0.999878
C19ORF40	3829160	ILMN_2173891	4890364	-3.77e-05	0.623069	0.129626	0.563435	0.45716	1.10584	0.283546	0.268848	0.776758	0.708675	0.999878
C19ORF43	3851703	ILMN_1784299	1470358	-0.000109492	-0.370982	-0.133807	0.771113	0.247164	-0.481099	-0.541369	0.630467	0.588253	0.905898	0.999878
C19ORF44	3823752	ILMN_1801572	6330367	0.000246954	1.15139	1.00735	0.882819	0.591353	1.30421	1.70346	0.19222	0.0884821	0.641186	0.999878
C19ORF45	3818826	ILMN_1755335	6020433	0.000140727	-1.19384	-0.0852032	0.804077	0.440029	-1.48473	-0.193631	0.137678	0.846465	0.559913	0.999878
C19ORF47	3862564	ILMN_1735608	4230603	-9.77e-05	0.537418	0.142541	0.769739	0.464409	0.698182	0.30693	0.485096	0.758897	0.842888	0.999878
C19ORF52	3820906	ILMN_1726181	6290253	-8.38e-05	0.37826	0.165869	0.577323	0.432975	0.655197	0.383091	0.512371	0.701652	0.857727	0.999878
C19ORF53	3822347	ILMN_1671374	3460184	-0.000209472	-0.208394	0.1475	0.512216	0.232714	-0.406847	0.633827	0.684137	0.526194	0.923108	0.999878
C19ORF54	3862785	ILMN_1729546	650167	-7.59e-05	0.456988	-0.463926	0.871598	0.460998	0.524311	-1.00635	0.600085	0.314247	0.893052	0.999878
C19ORF55	3830825	ILMN_2195397	5870750	-0.000207165	-0.312231	-0.0504858	1.013	0.601999	-0.308223	-0.0838636	0.757925	0.933165	0.942436	0.999878
C19ORF57	3852345	ILMN_1714419	4880040	9.65e-05	-1.32892	-0.074905	0.9528	0.582932	-1.39475	-0.128497	0.163153	0.897756	0.601039	0.999878
C19ORF59	3819088	ILMN_1762713	1070367	-0.000215226	-0.138122	0.251182	0.3387	0.131564	-0.407801	1.9092	0.683437	0.0562367	0.923108	0.999878
C19ORF60	3825225	ILMN_1668752	4050372	0.000528843	-1.19183	0.0055733	0.657412	0.441532	-1.81291	0.0126226	0.0699049	0.989929	0.43555	0.999878
C19ORF66	3820310	ILMN_1750400	5220204	-0.000180905	0.287145	-0.181136	0.78664	0.3091	0.365027	-0.58601	0.715107	0.557869	0.932603	0.999878
C19ORF70	3847338	ILMN_1765684	4200181	3.13e-06	-0.773784	-0.196276	0.75624	0.261595	-1.0232	-0.750307	0.306263	0.45307	0.735006	0.999878
C19ORF73	3867693	ILMN_1721628	2480202	-0.000201942	0.126021	-0.0990555	0.494613	0.564673	0.254787	-0.175421	0.798898	0.860749	0.95265	0.999878
C1GALT1	2989435	ILMN_1662578	580066	0.00134992	-0.996165	-0.291788	0.363883	0.333725	-2.7376	-0.874337	0.00621075	0.381935	0.148151	0.999878
C1ORF105	2367495	ILMN_1714222	1660731	-0.000182553	0.0538722	0.957458	0.50046	0.418643	0.107645	2.28705	0.914281	0.022193	0.982694	0.999878
C1ORF106	2374422	ILMN_1713952	7100021	-4.68e-05	-0.683765	-0.156503	0.866224	0.449057	-0.789363	-0.348514	0.429937	0.727454	0.819398	0.999878
C1ORF111	2441188	ILMN_1710993	6510139	-0.000142948	0.321672	0.801764	0.567145	0.617897	0.567179	1.29757	0.570618	0.194435	0.880924	0.999878
C1ORF112	2366581	ILMN_1727540	940240	-0.000120487	0.351018	-0.00682569	0.645874	0.500208	0.543478	-0.0136457	0.586825	0.989113	0.887656	0.999878
C1ORF115	2381249	ILMN_1674817	770564	-6.83e-05	0.59545	-0.0181423	0.675839	0.478763	0.881053	-0.037894	0.378331	0.969772	0.786097	0.999878
C1ORF127	2396362	ILMN_1744089	5260661	-0.000202465	0.0782787	0.41644	0.820601	0.441308	0.095392	0.943649	0.924007	0.345349	0.984464	0.999878
C1ORF131	2460487	ILMN_1805474	4760692	-0.000178451	0.653221	-0.514604	0.601861	0.319665	1.08534	-1.60982	0.277825	0.107437	0.715489	0.999878
C1ORF158	2321011	ILMN_1733298	6100754	0.00012606	-0.691338	-0.418618	0.641414	0.455358	-1.07783	-0.919316	0.281159	0.35793	0.717489	0.999878
C1ORF159	2391005	ILMN_1672811	5570523	-0.000136592	0.866512	-0.481164	1.2843	0.530194	0.674697	-0.907525	0.499899	0.364129	0.851432	0.999878
C1ORF162	2351854	ILMN_1754894	7050719	0.00108898	1.48787	-0.00961077	0.52549	0.169408	2.8314	-0.0567315	0.00465284	0.954759	0.123224	0.999878
C1ORF168	2414440	ILMN_1761999	6370358	-0.00016922	-0.469471	0.387926	0.805998	0.481235	-0.582471	0.806106	0.560275	0.420182	0.877127	0.999878
C1ORF170	4054681	ILMN_1784186	770181	0.000129337	0.736219	-0.305221	0.614888	0.529198	1.19732	-0.576762	0.231238	0.5641	0.680075	0.999878
C1ORF177	2337327	ILMN_1777437	4900471	-0.000190152	-0.215955	0.234655	0.745868	0.408845	-0.289535	0.573947	0.772184	0.566004	0.946092	0.999878
C1ORF180	2420511	ILMN_1704674	6860458	0.000595934	-0.646893	0.441669	0.298445	0.447723	-2.16755	0.986479	0.0302399	0.323898	0.304979	0.999878
C1ORF198	2460325	ILMN_1657683	1260576	-0.000187014	-0.121567	0.624883	0.626733	0.378381	-0.193969	1.65146	0.846208	0.0986438	0.966199	0.999878
C1ORF21	2371547	ILMN_1797735	2070470	0.00505809	1.8318	0.243859	0.348251	0.462715	5.26	0.527018	1.5e-07	0.598181	0.000150643	0.999878
C1ORF210	2409275	ILMN_1670064	540017	-0.000139707	-0.238111	-0.52754	0.602398	0.543036	-0.395271	-0.971464	0.69266	0.331317	0.925472	0.999878
C1ORF213	2325113	ILMN_1719831	5360475	0.000516711	-1.1862	0.305539	0.738325	0.449471	-1.60661	0.679774	0.108203	0.496648	0.518223	0.999878
C1ORF228	2334052	ILMN_1663068	1430634	-0.000210095	0.531844	-0.317204	0.877224	0.255085	0.606281	-1.24352	0.544356	0.213675	0.871083	0.999878
C1ORF229	2465546	ILMN_1666825	2850050	-0.00013567	-0.328814	0.421823	0.558822	0.437961	-0.588405	0.963152	0.556287	0.335471	0.875765	0.999878
C1ORF27	2372141	ILMN_1704222	3120195	-0.000141783	-0.606153	0.208578	0.612547	0.433696	-0.989561	0.48093	0.322436	0.630566	0.748048	0.999878
C1ORF35	2459417	ILMN_1790202	5820500	-0.000175134	0.300145	0.266633	0.917171	0.468101	0.32725	0.569606	0.743492	0.568945	0.939446	0.999878
C1ORF43	2436576	ILMN_1729509	3780411	5.16e-05	-0.739996	-0.343663	0.638619	0.33272	-1.15874	-1.03289	0.246616	0.301656	0.693841	0.999878
C1ORF50	2332767	ILMN_1801941	6350292	-0.000160688	0.137182	0.329894	0.372318	0.40665	0.368453	0.811246	0.712551	0.417224	0.931464	0.999878
C1ORF51	2358136	ILMN_1793543	2510068	-0.000191467	0.70173	-0.145588	0.797091	0.528633	0.880364	-0.275405	0.378704	0.783005	0.786227	0.999878
C1ORF52	2420790	ILMN_1742611	990167	-0.000147521	0.306859	0.197829	0.668151	0.336126	0.459266	0.588555	0.646063	0.55616	0.911399	0.999878
C1ORF63	2402111	ILMN_1760556	2320408	-2.8e-05	0.408067	-0.204214	0.5583	0.207147	0.73091	-0.985841	0.464868	0.324211	0.835503	0.999878
C1ORF64	2322211	ILMN_2066088	4540468	-0.000179527	-0.0693907	-0.57844	0.577889	0.480785	-0.120076	-1.20312	0.904428	0.228932	0.979921	0.999878
C1ORF65	2382043	ILMN_1798914	580682	-0.00019151	0.206836	-0.0487434	0.699655	0.433065	0.295626	-0.112554	0.767528	0.910384	0.944937	0.999878
C1ORF87	2415295	ILMN_2097943	7210477	-0.000181129	-0.486571	-0.233726	0.70508	0.45803	-0.690094	-0.510286	0.490167	0.609851	0.844874	0.999878
C1ORF94	2329481	ILMN_1793263	1820731	-0.000188683	0.196509	0.726774	0.698874	0.572223	0.281179	1.27009	0.778585	0.204053	0.947313	0.999878
C1ORF95	2383176	ILMN_1664592	2190521	4.6e-05	-0.824403	-0.356486	0.971123	0.458627	-0.848918	-0.77729	0.395968	0.436988	0.798692	0.999878
C1QA	2324856	ILMN_1737918	2940685	0.000364032	0.967494	0.494737	0.523843	0.443677	1.84691	1.11508	0.0648183	0.264814	0.424623	0.999878
C1QB	2324884	ILMN_1796409	5910019	6.05e-05	0.976478	-0.340087	0.668896	0.272132	1.45983	-1.24971	0.144398	0.211405	0.570864	0.999878
C1QBP	3742708	ILMN_1668996	7200392	-0.000195907	-0.340945	-0.1408	0.783432	0.283856	-0.435194	-0.496028	0.66344	0.619875	0.91627	0.999878
C1QC	2324873	ILMN_1785902	1440341	0.000475029	-1.05769	0.0420714	0.613695	0.417572	-1.72348	0.100753	0.0848627	0.919747	0.469606	0.999878
C1QL1	3759493	ILMN_1716957	6770121	-9.47e-05	-0.71932	0.0427064	0.885773	0.598992	-0.812081	0.0712972	0.416783	0.943161	0.810823	0.999878
C1QL2	2573016	ILMN_1756236	7210041	-0.000147388	0.187184	0.382765	0.4921	0.463653	0.380377	0.825542	0.703682	0.409064	0.928286	0.999878
C1QTNF1	3736636	ILMN_1701459	5080672	-0.00014765	-0.493083	-0.568058	0.898994	0.552573	-0.548483	-1.02802	0.583384	0.303939	0.886033	0.999878
C1QTNF2	2884623	ILMN_1813307	2810349	-0.000201925	-0.0189925	0.763768	0.526215	0.475999	-0.0360927	1.60456	0.97121	0.108591	0.995497	0.999878
C1QTNF3	2852766	ILMN_1768925	5220639	-9.51e-05	0.617031	-0.579478	0.751807	0.564618	0.82073	-1.02632	0.411839	0.304742	0.807679	0.999878
C1QTNF5	3394315	ILMN_1744487	7320204	8.94e-05	-0.774375	0.0716677	0.748441	0.573176	-1.03465	0.125036	0.300882	0.900495	0.731286	0.999878
C1QTNF6	3960005	ILMN_1729288	1010446	-0.000197557	-0.0184367	-0.51945	0.899207	0.485304	-0.0205033	-1.07036	0.983643	0.284457	0.997785	0.999878
C1QTNF7	2719440	ILMN_1662935	6650280	-0.00014088	0.106672	0.0391438	0.39198	0.441394	0.272135	0.0886821	0.785529	0.929335	0.94865	0.999878
C1QTNF8	3675620	ILMN_1695740	6270091	3.01e-05	-0.841841	0.0313374	0.739674	0.59631	-1.13812	0.0525523	0.255123	0.958089	0.698802	0.999878
C1R	3442475	ILMN_1677198	5260474	-6.95e-06	0.920249	0.34753	0.915402	0.577387	1.00529	0.601901	0.314804	0.54724	0.741909	0.999878
C1RL	3442514	ILMN_1733288	5810424	-0.000207851	0.112654	0.0234705	0.744104	0.310877	0.151396	0.0754977	0.87967	0.939819	0.97364	0.999878
C1S	3403168	ILMN_1781626	7400707	8.43e-05	0.705376	0.615571	0.910695	0.463363	0.774548	1.32848	0.438643	0.184018	0.824595	0.999878
C20ORF112	3902743	ILMN_1652219	1010725	0.00120285	0.865094	-0.390582	0.330518	0.431698	2.61739	-0.904758	0.00888697	0.365594	0.172444	0.999878
C20ORF144	3882614	ILMN_1688258	4120762	-0.000140248	0.221446	0.426986	0.324072	0.583819	0.683323	0.731367	0.494434	0.464555	0.848411	0.999878
C20ORF166	3913335	ILMN_1789950	4540403	-0.000160919	0.237473	-0.234386	0.884861	0.583849	0.268373	-0.401449	0.788423	0.68809	0.94898	0.999878
C20ORF173	3903999	ILMN_1786483	4780672	-0.00014996	0.217662	-0.0420064	0.534464	0.459439	0.407253	-0.0914299	0.683839	0.927151	0.923108	0.999878
C20ORF196	3875108	ILMN_1793002	7160066	0.0015041	1.2127	0.195164	0.479904	0.441011	2.52696	0.442537	0.011536	0.658101	0.193408	0.999878
C20ORF197	3891723	ILMN_1691228	1340176	-0.000168162	0.1585	-0.396007	0.629278	0.535407	0.251876	-0.739638	0.801147	0.45952	0.953218	0.999878
C20ORF201	3914327	ILMN_1780283	1500546	0.000314748	-1.05044	-0.621729	0.733082	0.508705	-1.43291	-1.22218	0.151946	0.22164	0.585155	0.999878
C20ORF203	3902871	ILMN_1773383	5670240	-0.000161374	-0.225664	0.486327	0.67381	0.503444	-0.334908	0.966	0.737708	0.334044	0.938799	0.999878
C20ORF85	3890840	ILMN_1661618	2570228	-4.54e-05	0.334719	-0.62407	0.419566	0.476436	0.797775	-1.30987	0.425039	0.190239	0.817052	0.999878
C21ORF119	3918098	ILMN_1728403	3440132	-0.000177376	0.236767	-0.24608	0.5641	0.573695	0.419726	-0.428939	0.674704	0.667968	0.9207	0.999878
C21ORF128	3933451	ILMN_1663893	4900040	-0.000141035	0.338902	-0.0636342	0.590713	0.351433	0.573717	-0.181071	0.566185	0.856312	0.879064	0.999878
C21ORF33	3923537	ILMN_2386205	5870576	-0.000193462	-0.0581106	-0.701597	0.823727	0.394302	-0.0705459	-1.77934	0.943762	0.0751841	0.990579	0.999878
C21ORF62	3929450	ILMN_1814369	6110152	0.000380437	-0.381621	0.107071	0.256971	0.543098	-1.48507	0.197149	0.137587	0.843711	0.559913	0.999878
C21ORF67	3934785	ILMN_1808602	6660296	0.000329056	-1.74574	0.49462	0.930456	0.474764	-1.87621	1.04182	0.0606836	0.297493	0.416332	0.999878
C21ORF88	3932397	ILMN_1716682	3310110	-6.39e-05	-0.46976	0.464532	0.620418	0.564112	-0.757167	0.823475	0.448985	0.410238	0.82981	0.999878
C21ORF90	3923811	ILMN_1666773	6900017	-0.00013346	-0.181254	0.6195	0.362339	0.607497	-0.500234	1.01976	0.616932	0.307843	0.899126	0.999878
C21ORF91	3926138	ILMN_2110496	2450088	-0.000198686	0.0089836	0.918376	0.513516	0.465404	0.0174943	1.97329	0.986043	0.0484628	0.997801	0.999878
C22ORF15	3939450	ILMN_1802771	7570133	-0.000201745	0.19962	-0.298309	0.827078	0.638853	0.241356	-0.466945	0.809289	0.640539	0.956033	0.999878
C22ORF23	3960276	ILMN_1721338	650717	-9.89e-05	-0.395191	-0.35077	0.766237	0.504016	-0.515755	-0.69595	0.606048	0.48646	0.894948	0.999878
C22ORF26	3963905	ILMN_1673743	5420093	-0.000179973	-0.242725	0.530563	0.643743	0.534101	-0.377053	0.993376	0.70615	0.320527	0.928841	0.999878
C22ORF31	3956670	ILMN_1757114	3840075	-0.000200793	0.123722	-0.170722	0.440031	0.492993	0.281167	-0.346297	0.778594	0.729119	0.947313	0.999878
C22ORF34	3965102	ILMN_1717371	3140064	-0.000209895	-0.0846823	0.302278	0.5399	0.300837	-0.156848	1.00479	0.875371	0.314998	0.972981	0.999878
C22ORF43	3954764	ILMN_1766178	5810484	4.17e-07	-0.558422	0.324957	0.513285	0.445101	-1.08794	0.730076	0.276675	0.465344	0.715091	0.999878
C2CD2L	3351895	ILMN_1778132	6520364	-0.000195011	0.0178093	-0.540603	0.393152	0.493231	0.0452987	-1.09605	0.963871	0.273059	0.993147	0.999878
C2CD3	3381702	ILMN_1691757	2470438	-0.000175949	0.338125	-0.866654	0.747005	0.601822	0.452641	-1.44005	0.650826	0.149853	0.91211	0.999878
C2CD5	3447129	ILMN_1682572	1240661	8.17e-06	0.702935	-0.139876	0.732519	0.235013	0.959614	-0.595182	0.337296	0.551722	0.760641	0.999878
C2ORF16	2474637	ILMN_1780840	1710707	0.000364571	-0.999452	0.104575	0.692417	0.457088	-1.44343	0.228786	0.148963	0.819035	0.577171	0.999878
C2ORF27B	2576608	ILMN_2089316	2120446	-0.000137448	0.389614	-0.152773	0.413369	0.396361	0.942533	-0.38544	0.345965	0.699911	0.763011	0.999878
C2ORF40	2498274	ILMN_1676822	3140113	-0.000167542	-0.174084	-0.274362	0.347755	0.47237	-0.500593	-0.58082	0.616679	0.561362	0.899126	0.999878
C2ORF42	2558483	ILMN_1661594	5420719	0.000264459	0.81956	0.302215	0.535485	0.377839	1.5305	0.799853	0.125955	0.423796	0.544684	0.999878
C2ORF43	2543066	ILMN_1660275	6860273	-0.000183654	-0.124461	0.478667	0.502813	0.42361	-0.24753	1.12997	0.804508	0.258489	0.953978	0.999878
C2ORF44	2544164	ILMN_1730631	6100154	0.00014697	0.683188	0.0618872	0.542932	0.386263	1.25833	0.160221	0.20833	0.872707	0.658029	0.999878
C2ORF49	2498046	ILMN_1701131	870731	-0.000193111	0.127098	0.162717	0.452389	0.408207	0.280947	0.398614	0.778762	0.690178	0.947313	0.999878
C2ORF50	2469696	ILMN_1768071	1820487	-0.00013905	0.431861	0.145682	0.602026	0.520632	0.717346	0.279817	0.473194	0.779618	0.838315	0.999878
C2ORF54	2606959	ILMN_1665471	1050128	-4.4e-05	1.0081	-0.255312	0.75848	0.498285	1.3291	-0.512382	0.183876	0.608384	0.632877	0.999878
C2ORF62	2527715	ILMN_1776122	2680564	0.000223	-1.17815	0.157807	0.837229	0.524344	-1.4072	0.300961	0.159429	0.763444	0.597176	0.999878
C2ORF69	2521997	ILMN_1668657	3390220	-0.000182552	0.37176	-0.358917	0.519335	0.468057	0.715839	-0.766824	0.474124	0.443186	0.838315	0.999878
C2ORF73	2482440	ILMN_1797577	7210164	-0.000187694	0.0577191	0.560827	0.671621	0.446693	0.08594	1.25551	0.931518	0.209294	0.987141	0.999878
C2ORF82	2532626	ILMN_1774265	4280327	-0.000149932	0.454557	0.569172	0.794428	0.497565	0.572181	1.14392	0.567225	0.252658	0.879447	0.999878
C2ORF83	2602368	ILMN_2174948	4590079	0.000580005	-0.71567	-0.82649	0.357229	0.561186	-2.00339	-1.47276	0.0451889	0.140817	0.365699	0.999878
C3	3848039	ILMN_1762260	4860494	-6.69e-05	0.783424	0.427845	1.12085	0.574071	0.698957	0.745283	0.484611	0.456101	0.842774	0.999878
C3ORF14	2627080	ILMN_1761882	6560088	0.000179974	-0.544455	0.57298	0.387379	0.497653	-1.40548	1.15136	0.159939	0.249583	0.597417	0.999878
C3ORF17	2688882	ILMN_2331658	7550280	0.000165848	-0.785175	0.534099	0.676624	0.387653	-1.16043	1.37778	0.245929	0.168272	0.693066	0.999878
C3ORF18	2675457	ILMN_1728581	3370372	0.000283915	-1.14448	-0.373326	0.783946	0.495737	-1.4599	-0.753073	0.144379	0.451406	0.570864	0.999878
C3ORF22	2693654	ILMN_1653228	3130487	-0.000203961	0.0970079	-0.0660343	0.546258	0.387376	0.177586	-0.170466	0.859055	0.864644	0.968892	0.999878
C3ORF30	2637819	ILMN_1742009	6290075	0.000281453	0.819784	0.404271	0.408146	0.447564	2.00856	0.903269	0.0446373	0.366383	0.363413	0.999878
C3ORF36	2696109	ILMN_1795936	2760064	-9.02e-05	0.365368	0.123636	0.433716	0.374622	0.842412	0.330029	0.399597	0.741378	0.800644	0.999878
C3ORF37	2641577	ILMN_1815682	1500762	1.59e-05	-0.912515	-0.25286	0.567719	0.308462	-1.60734	-0.819746	0.108044	0.412361	0.518171	0.999878
C3ORF38	2632051	ILMN_1697742	3450039	0.0001631	-0.594114	-0.521759	0.477233	0.418491	-1.24491	-1.24676	0.213221	0.212485	0.662546	0.999878
C3ORF58	2646327	ILMN_1797372	4060131	0.000110315	-1.01898	-0.186842	0.551339	0.336483	-1.84819	-0.555281	0.0646338	0.578703	0.424623	0.999878
C3ORF62	2674168	ILMN_1679339	130280	0.000229111	0.667443	-0.344864	0.434544	0.387355	1.53596	-0.890305	0.12461	0.373302	0.542836	0.999878
C3ORF67	2678526	ILMN_1697761	1770167	0.000233411	1.24517	0.301761	0.783397	0.552521	1.58945	0.546154	0.112021	0.58496	0.5237	0.999878
C4BPA	2377165	ILMN_1810752	2000128	0.000786169	-0.326606	-0.0831132	0.17349	0.111428	-1.88256	-0.745891	0.0598173	0.455733	0.414185	0.999878
C4ORF19	2723605	ILMN_1795838	670475	0.000214235	0.787609	-0.579023	0.505729	0.500731	1.55737	-1.15635	0.119445	0.247536	0.535487	0.999878
C4ORF21	2782292	ILMN_1754017	6400367	-0.000173801	0.140367	-0.226851	0.639704	0.603738	0.219424	-0.375744	0.826328	0.707107	0.961961	0.999878
C4ORF22	2733392	ILMN_1665714	5550176	-0.000123373	0.342801	0.646716	0.571053	0.481277	0.600296	1.34375	0.548336	0.17903	0.872847	0.999878
C4ORF26	2731782	ILMN_1794239	1820315	-0.000198461	0.00115456	-0.444508	0.415256	0.517818	0.00278036	-0.858425	0.997782	0.390658	0.999524	0.999878
C4ORF27	2793310	ILMN_1698677	4780215	0.000113786	0.30853	-0.538741	0.270902	0.407957	1.1389	-1.32058	0.254799	0.18664	0.698802	0.999878
C4ORF29	2743029	ILMN_1761963	5810192	0.000552758	1.28883	-0.023354	0.60352	0.373014	2.13553	-0.062609	0.0327662	0.950078	0.316357	0.999878
C4ORF3	2783473	ILMN_2051684	1980369	0.000631746	-0.805391	0.0114256	0.387926	0.244928	-2.07614	0.0466488	0.0379312	0.962793	0.335832	0.999878
C4ORF36	2776851	ILMN_2214713	6760019	-0.000180066	-0.12738	0.0376311	0.603152	0.445478	-0.21119	0.0844734	0.832747	0.93268	0.963754	0.999878
C4ORF40	2730257	ILMN_2231546	4010408	-6.82e-05	0.28911	0.224937	0.487991	0.597848	0.59245	0.376244	0.553576	0.706735	0.87474	0.999878
C4ORF45	2791593	ILMN_1694131	2450180	-0.00022098	0.0897316	0.0857115	0.423711	0.610822	0.211775	0.140322	0.832291	0.888406	0.963655	0.999878
C5	3223776	ILMN_1746819	1340241	-0.000108341	0.387077	0.128576	0.63893	0.461936	0.605821	0.278342	0.544661	0.78075	0.871083	0.999878
C5AR1	3837257	ILMN_1689836	6450092	0.000168193	-0.734182	-0.0379396	0.483864	0.163931	-1.51733	-0.231437	0.129246	0.816975	0.551103	0.999878
C5ORF20	2876543	ILMN_1701911	2000162	-0.000214611	0.264005	-0.261313	0.702389	0.424117	0.375867	-0.616134	0.707031	0.537806	0.929391	0.999878
C5ORF27	2821041	ILMN_1662880	4920097	0.000671953	-1.44532	0.176755	0.704765	0.476649	-2.05079	0.370829	0.0403392	0.710765	0.344988	0.999878
C5ORF28	2855578	ILMN_1694798	6200300	-0.000147028	-0.418254	-0.324231	0.528775	0.454096	-0.790985	-0.714015	0.42899	0.475218	0.819161	0.999878
C5ORF34	2855614	ILMN_2198575	1570221	-0.000175867	-0.155351	0.28761	0.682063	0.544277	-0.227766	0.528425	0.819837	0.597204	0.959689	0.999878
C5ORF38	2799509	ILMN_1695852	6110309	3.91e-05	-0.557545	0.19679	0.691915	0.600604	-0.8058	0.327654	0.420396	0.743174	0.812474	0.999878
C5ORF42	2853642	ILMN_1677303	3440484	0.000215314	0.869912	-0.0815168	0.678553	0.446205	1.28201	-0.182689	0.199898	0.855042	0.649615	0.999878
C5ORF46	2880463	ILMN_1718866	1450161	-0.000198201	-0.000159441	-0.0496662	0.520619	0.470429	-0.000306254	-0.105576	0.999756	0.915919	0.999839	0.999878
C5ORF48	2827177	ILMN_1806520	6520746	-0.000165535	0.162785	0.225884	0.396404	0.589065	0.410655	0.383461	0.681343	0.701378	0.922497	0.999878
C5ORF51	2807862	ILMN_1783023	3180132	-0.000132635	-0.659242	-0.842155	0.699277	0.373233	-0.942747	-2.25638	0.345856	0.0240468	0.763011	0.999878
C5ORF58	2840238	ILMN_1715644	3140639	-9.58e-05	-0.32793	-0.16621	0.488487	0.421788	-0.671317	-0.394061	0.502049	0.693536	0.852506	0.999878
C6	2854915	ILMN_1688242	6520040	0.000250083	-1.12945	-0.0914153	0.856152	0.4509	-1.31922	-0.202739	0.187156	0.839339	0.637072	0.999878
C6ORF1	2951057	ILMN_2372199	520044	-0.000161749	-0.129574	-0.584567	0.811594	0.593119	-0.159653	-0.985582	0.873161	0.324338	0.972555	0.999878
C6ORF106	2951221	ILMN_1704253	7320110	0.00233898	2.45271	0.378026	0.728404	0.373121	3.36723	1.01315	0.000764955	0.310991	0.0463201	0.999878
C6ORF118	2984230	ILMN_1753658	2630121	-0.000178515	-0.352669	0.128147	0.725438	0.463514	-0.486146	0.276467	0.626885	0.782189	0.904883	0.999878
C6ORF201	2892800	ILMN_1651624	70187	-5.06e-05	0.769224	-0.226629	0.665809	0.567553	1.15532	-0.399309	0.248013	0.689665	0.694968	0.999878
C6ORF203	2919927	ILMN_1778951	3170564	-0.000221599	0.133504	-0.316974	0.350934	0.414819	0.380425	-0.764126	0.703646	0.444792	0.928286	0.999878
C6ORF211	2931683	ILMN_1798108	2750129	0.000837728	-1.37723	0.371431	0.511007	0.43449	-2.69513	0.854867	0.00705953	0.392625	0.154668	0.999878
C6ORF57	2912860	ILMN_1728057	2570068	8.21e-05	-0.615259	-0.396704	0.541826	0.524898	-1.13553	-0.755773	0.256208	0.449785	0.698802	0.999878
C6ORF58	2925013	ILMN_1754920	3870593	8.71e-05	-0.853618	0.124571	0.686562	0.44277	-1.24332	0.281345	0.213807	0.778446	0.662989	0.999878
C6ORF62	2945677	ILMN_1653797	5860754	0.00228708	2.0759	0.102774	0.603153	0.198192	3.44174	0.518557	0.000582684	0.60407	0.041302	0.999878
C6ORF89	2905256	ILMN_1665117	3310181	-0.000140799	-0.45509	-0.175072	0.694807	0.419565	-0.654988	-0.417271	0.512505	0.67648	0.857727	0.999878
C7	2807716	ILMN_1687848	4920221	-0.000179069	-0.142454	0.0714223	0.810223	0.59289	-0.175821	0.120465	0.860442	0.904115	0.968964	0.999878
C7ORF10	2998638	ILMN_1763011	2470102	0.000152186	-0.738057	0.399261	0.583792	0.537486	-1.26425	0.74283	0.2062	0.457585	0.655941	0.999878
C7ORF26	2989141	ILMN_1730048	3780148	0.000915882	-1.30551	0.0761002	0.574704	0.320534	-2.27162	0.237417	0.0231516	0.812334	0.271642	0.999878
C7ORF31	3042012	ILMN_1706101	1470687	-0.000227101	0.0980017	0.0118536	0.691569	0.456164	0.141709	0.0259855	0.887315	0.979269	0.975569	0.999878
C7ORF33	3030248	ILMN_1779225	6550670	0.000373423	0.865937	1.01047	0.481868	0.542543	1.79704	1.86248	0.0723892	0.0625361	0.44237	0.999878
C7ORF34	3028911	ILMN_1700588	1430386	0.000204323	0.290497	-0.349547	0.22923	0.457801	1.26727	-0.763534	0.205116	0.445145	0.654567	0.999878
C7ORF60	3068519	ILMN_1658210	2940521	0.000305924	-1.02712	0.288294	0.57349	0.578158	-1.79101	0.498643	0.0733523	0.618031	0.445661	0.999878
C7ORF61	3064024	ILMN_2226691	1980452	-0.000184538	0.385746	0.218831	0.702129	0.456185	0.549395	0.479697	0.582759	0.631443	0.885975	0.999878
C7ORF69	3000905	ILMN_1695301	4860521	-0.000165643	0.0918336	-0.614463	0.293438	0.628124	0.312958	-0.978251	0.754326	0.32795	0.941624	0.999878
C7ORF76	3062302	ILMN_1697691	2490692	-0.000119053	0.483838	0.354758	0.608157	0.473903	0.795582	0.748588	0.426313	0.454105	0.817057	0.999878
C8A	2337786	ILMN_1710606	6450403	-0.000177663	-0.103999	-0.39168	0.857331	0.568174	-0.121305	-0.689367	0.903454	0.490592	0.979921	0.999878
C8B	2414505	ILMN_1731293	5260551	0.00110989	2.18212	0.70364	0.776814	0.432126	2.80906	1.62832	0.00498784	0.103457	0.129255	0.999878
C8G	3194969	ILMN_1737242	2000072	-0.000219841	-0.179993	0.338493	0.797986	0.465969	-0.225559	0.726428	0.821553	0.467576	0.960215	0.999878
C8ORF22	3097580	ILMN_1811735	2940414	-2.11e-05	0.70485	0.0303867	0.604348	0.468409	1.1663	0.0648721	0.243549	0.948276	0.691593	0.999878
C8ORF31	3119376	ILMN_1790751	2450142	-6.11e-05	0.514803	-0.0945062	0.53338	0.467583	0.965171	-0.202116	0.334505	0.839826	0.75838	0.999878
C8ORF33	3121023	ILMN_2098325	1470397	-4.42e-05	0.943113	-0.0363191	0.76358	0.409766	1.23512	-0.0886338	0.216844	0.929373	0.664922	0.999878
C8ORF37	3145240	ILMN_1676797	4280470	-0.000198212	-0.00758112	0.195026	0.378054	0.467005	-0.020053	0.417609	0.984002	0.676233	0.997785	0.999878
C8ORF4	3095313	ILMN_1656369	5570731	-0.000188872	0.130311	-0.746372	0.4281	0.534846	0.304393	-1.39549	0.760841	0.162868	0.94371	0.999878
C8ORF46	3101681	ILMN_1657149	4570341	-0.000200558	-0.0313622	-0.0243181	0.671422	0.52244	-0.0467101	-0.0465471	0.962746	0.962874	0.993051	0.999878
C8ORF47	3108648	ILMN_1670975	5690278	-0.000190845	-0.0956851	-0.236267	0.594517	0.450724	-0.160946	-0.524196	0.872142	0.600143	0.972005	0.999878
C8ORF48	3086915	ILMN_1784408	5860392	-6.48e-05	-0.30043	0.628725	0.496887	0.374729	-0.604625	1.67781	0.545455	0.0933836	0.871716	0.999878
C8ORF58	3089569	ILMN_1764320	1710386	4.28e-05	0.754202	-0.199392	0.669956	0.489607	1.12575	-0.407248	0.260326	0.683826	0.703453	0.999878
C8ORF59	3142932	ILMN_1653205	1510452	0.0029524	-1.58732	0.151759	0.423833	0.267991	-3.74516	0.566284	0.00018229	0.571201	0.021966	0.999878
C8ORF86	3132124	ILMN_1801725	7320601	-0.000174266	0.186386	0.741116	0.509684	0.472947	0.365689	1.56702	0.714612	0.11711	0.932439	0.999878
C9	2854409	ILMN_1767831	3420521	-0.000202821	-0.0322903	0.270981	0.217304	0.589771	-0.148595	0.459467	0.881879	0.645899	0.974542	0.999878
C9ORF114	3226709	ILMN_1803317	770692	-2.6e-05	0.729202	0.183258	0.979527	0.32237	0.744443	0.568472	0.456643	0.569715	0.832837	0.999878
C9ORF116	3229449	ILMN_1723709	2120161	0.000240487	-1.01264	0.280302	0.706205	0.534251	-1.43392	0.524664	0.151658	0.599817	0.584418	0.999878
C9ORF123	3198289	ILMN_1769409	70753	0.000907411	-0.851466	-0.0752228	0.3786	0.350802	-2.24899	-0.214431	0.0245564	0.830211	0.280952	0.999878
C9ORF131	3167684	ILMN_2365667	4570674	-0.000189072	-0.0747963	-0.553524	0.619985	0.570921	-0.120642	-0.969528	0.903979	0.332282	0.979921	0.999878
C9ORF139	3195102	ILMN_1769538	1740615	0.000245926	-1.03307	0.246357	0.648889	0.559792	-1.59206	0.440086	0.111434	0.659875	0.523477	0.999878
C9ORF142	3195083	ILMN_1761138	4180445	-0.000197208	0.235168	0.18267	0.593771	0.191658	0.396059	0.953106	0.692078	0.340536	0.925472	0.999878
C9ORF156	3216931	ILMN_1700028	3440446	-8.08e-05	0.562884	-0.226799	0.624489	0.393662	0.901351	-0.576127	0.367445	0.56453	0.777883	0.999878
C9ORF16	3190210	ILMN_1782618	1170019	-7.28e-06	0.753252	0.290572	0.763206	0.354813	0.986958	0.818945	0.32371	0.412818	0.748982	0.999878
C9ORF163	3194395	ILMN_1719280	1940239	0.000168725	-0.525284	0.619038	0.361277	0.590082	-1.45397	1.04907	0.146018	0.294145	0.57276	0.999878
C9ORF170	3177863	ILMN_1701645	3180370	-0.000192083	0.0278048	0.0469919	0.351307	0.433603	0.0791467	0.108376	0.936919	0.913698	0.988981	0.999878
C9ORF171	3192434	ILMN_1663665	6270246	-0.000198158	-0.000254574	0.415894	0.63697	0.401207	-0.000399664	1.03661	0.999681	0.299919	0.999839	0.999878
C9ORF37	3231186	ILMN_1799320	4200204	-0.000150935	-0.187455	0.195101	0.489338	0.449399	-0.383079	0.434137	0.701677	0.664189	0.928286	0.999878
C9ORF40	3210108	ILMN_1711799	4810139	-0.000143524	0.424249	0.132145	0.601888	0.448886	0.704864	0.294385	0.480928	0.768464	0.841344	0.999878
C9ORF41	3210130	ILMN_2077160	7040086	0.000514528	1.07295	0.146691	0.612492	0.493756	1.75177	0.297092	0.079874	0.766397	0.459193	0.999878
C9ORF43	3185618	ILMN_1796499	3290491	-0.000164666	-0.273117	-0.324859	0.653245	0.561302	-0.418092	-0.578761	0.675898	0.562751	0.920956	0.999878
C9ORF50	3226975	ILMN_1701873	3840048	-8.23e-05	0.288515	-0.101966	0.804458	0.415892	0.358645	-0.245175	0.719876	0.806321	0.933541	0.999878
C9ORF53	3164999	ILMN_1687924	1450224	-0.000219086	0.113142	-0.538887	0.441015	0.485124	0.25655	-1.11082	0.797536	0.266644	0.952423	0.999878
C9ORF62	3193848	ILMN_1815635	1820220	-2.58e-05	-0.915683	0.766662	0.848349	0.342865	-1.07937	2.23605	0.280475	0.0253487	0.717182	0.999878
C9ORF64	3212277	ILMN_1777318	4920215	-0.000198322	-0.000442623	0.488992	0.42375	0.429351	-0.00104454	1.13891	0.999167	0.254741	0.99956	0.999878
C9ORF66	3196034	ILMN_1717248	3130139	0.001553	-1.37527	-0.661644	0.480448	0.446191	-2.86247	-1.48287	0.00422086	0.138109	0.117192	0.999878
C9ORF78	3227121	ILMN_1697166	3890524	0.00185222	0.807057	0.161838	0.252697	0.0957047	3.19377	1.69102	0.00141291	0.0908339	0.0642475	0.999878
C9ORF85	3174429	ILMN_1678477	520050	-8.37e-05	0.343042	-0.224799	0.346793	0.431721	0.989185	-0.520703	0.32262	0.602573	0.748186	0.999878
C9ORF89	3179669	ILMN_1659189	5090176	0.000230113	-1.01559	0.19335	0.721326	0.292829	-1.40795	0.660284	0.159207	0.509071	0.596807	0.999878
C9ORF9	3192580	ILMN_1813837	5860709	-0.000172462	-0.326674	0.746801	0.722562	0.498251	-0.452105	1.49885	0.651213	0.133913	0.91211	0.999878
C9ORF91	3186207	ILMN_1803652	5720131	-0.000168862	-0.185444	-0.300047	0.672167	0.342355	-0.275889	-0.87642	0.782644	0.380802	0.948397	0.999878
C9ORF96	3192912	ILMN_1745713	1570301	6.11e-07	-0.213295	-0.291533	0.228641	0.424813	-0.93288	-0.686262	0.350927	0.492548	0.765784	0.999878
CA1	3142967	ILMN_1652431	2190139	0.000320011	0.310195	0.0493648	0.223171	0.0579175	1.38994	0.85233	0.164607	0.394031	0.603145	0.999878
CA12	3628498	ILMN_2382942	3830075	0.000137952	-1.15252	0.152314	0.872215	0.612395	-1.32137	0.248718	0.186438	0.803579	0.635897	0.999878
CA13	3105506	ILMN_1802414	3130703	0.00193673	1.76448	0.442475	0.524867	0.440662	3.36176	1.00411	0.00078025	0.315324	0.0470101	0.999878
CA14	2358092	ILMN_1742358	4200400	-9.54e-05	0.548752	0.0592118	0.571885	0.562685	0.95955	0.105231	0.337328	0.916193	0.760641	0.999878
CA2	3105600	ILMN_2199439	2060674	0.00159599	0.808634	0.404752	0.306679	0.177182	2.63675	2.28438	0.00839621	0.022349	0.165391	0.999878
CA4	3729419	ILMN_1695157	6380672	-0.000197611	0.0203123	0.130332	0.773232	0.140275	0.0262693	0.929121	0.979044	0.352827	0.9974	0.999878
CA5A	3703944	ILMN_1731292	840521	-0.00019226	-0.0857627	-0.254206	0.45798	0.544275	-0.187263	-0.467054	0.851462	0.640461	0.967074	0.999878
CA5B	3969855	ILMN_1672807	1690044	6.95e-05	0.48974	-0.216605	0.497739	0.333737	0.983929	-0.649027	0.325198	0.516321	0.750637	0.999878
CA6	2319135	ILMN_1708790	2340603	-0.000153269	0.372445	-0.136715	0.631376	0.512409	0.589894	-0.266809	0.555288	0.789616	0.875356	0.999878
CA7	3664924	ILMN_1784626	4180528	-0.000198102	-0.138658	-0.105674	0.883012	0.609891	-0.157029	-0.173267	0.875228	0.862441	0.972981	0.999878
CA8	3137120	ILMN_1696615	1850097	0.000765693	-0.849154	-0.333613	0.451247	0.546638	-1.88179	-0.610301	0.0599218	0.541663	0.414185	0.999878
CAAP1	3202136	ILMN_1755222	380348	-2.99e-05	-0.537586	0.114763	0.695382	0.499857	-0.773081	0.229592	0.439511	0.818409	0.825053	0.999878
CAB39	2531522	ILMN_1765858	7000017	-7.52e-05	-0.501575	0.0637421	0.67638	0.156203	-0.741558	0.408072	0.45839	0.683221	0.833499	0.999878
CAB39L	3513752	ILMN_1730529	5890010	-0.000141421	-0.18123	0.249826	0.456169	0.47394	-0.397287	0.527125	0.691173	0.598107	0.925363	0.999878
CABLES1	3781531	ILMN_1653001	4050411	-0.000199704	-0.0171484	-0.154442	0.517295	0.523559	-0.0331502	-0.294985	0.973556	0.768005	0.996254	0.999878
CABP1	3434490	ILMN_1755428	2140112	-9.47e-06	-0.89555	-0.147931	0.748691	0.553856	-1.19615	-0.267094	0.231693	0.789397	0.680214	0.999878
CABP2	3378957	ILMN_1720136	3840039	-4.16e-05	-0.645549	1.02026	0.632986	0.446339	-1.01985	2.28585	0.30785	0.022263	0.736103	0.999878
CABP5	3866831	ILMN_1676973	2230278	-0.000164457	0.0285462	0.631789	0.137611	0.331312	0.207441	1.90693	0.835674	0.0565295	0.96431	0.999878
CACNA1A	3852133	ILMN_1761851	3870390	-3.62e-05	-1.55795	0.117838	1.60571	0.453605	-0.970256	0.259782	0.331966	0.795032	0.755583	0.999878
CACNA1C	3401086	ILMN_1861819	3890162	-2.62e-05	-0.47623	0.359303	0.510003	0.437435	-0.933779	0.821385	0.350463	0.411427	0.765784	0.999878
CACNA1F	4007919	ILMN_1659138	1850528	-0.000202609	0.606759	-0.0430176	1.49762	0.617636	0.405149	-0.0696488	0.685385	0.944473	0.923108	0.999878
CACNA1H	3643580	ILMN_1671263	6220343	-4.54e-05	-2.10986	0.360927	1.60616	0.509861	-1.3136	0.707893	0.18904	0.479012	0.638757	0.999878
CACNA1S	2450568	ILMN_1667980	4210056	0.000670773	-2.28716	-0.0974719	1.37971	0.349363	-1.65772	-0.278999	0.0974372	0.780246	0.493742	0.999878
CACNA2D1	3058991	ILMN_1768533	6840707	-0.00019612	0.0409383	-0.414021	1.16486	0.517256	0.0351444	-0.800417	0.971966	0.423469	0.995497	0.999878
CACNA2D2	2675315	ILMN_2355274	4570286	-0.000123578	0.885664	0.213235	0.777178	0.597832	1.13959	0.35668	0.254512	0.721331	0.698802	0.999878
CACNA2D4	3440066	ILMN_2404493	4640397	1.39e-05	-1.49349	-0.380068	1.3964	0.471929	-1.06953	-0.805349	0.284883	0.420618	0.720461	0.999878
CACNG1	3732145	ILMN_1724306	460161	-0.000197324	0.310889	0.44934	0.716315	0.447868	0.434012	1.00329	0.664299	0.315723	0.91714	0.999878
CACNG2	3959787	ILMN_1769492	6580112	-0.000117648	0.151129	0.0336237	0.416451	0.582066	0.362898	0.0577662	0.716696	0.953935	0.932844	0.999878
CACNG3	3653266	ILMN_1768758	5220576	-0.000203394	-0.069519	0.947354	0.644126	0.584057	-0.107928	1.62202	0.914057	0.104799	0.982694	0.999878
CACNG4	3732092	ILMN_1702149	5090767	-0.000102217	-0.447362	-0.21993	0.761559	0.457375	-0.587429	-0.480853	0.556942	0.630621	0.875992	0.999878
CACNG6	3841184	ILMN_1809676	4830167	0.000606088	-1.56588	-0.454214	0.758188	0.459137	-2.06529	-0.989278	0.0389465	0.322527	0.338604	0.999878
CACNG7	3841134	ILMN_1669816	4390364	-6.94e-05	-0.458945	-0.0507452	0.559226	0.580159	-0.82068	-0.0874677	0.411868	0.9303	0.807679	0.999878
CACUL1	3309124	ILMN_1792270	4070598	0.000179555	-0.935633	-0.046699	0.830826	0.486442	-1.12615	-0.0960011	0.260157	0.92352	0.703362	0.999878
CAD	2474341	ILMN_1810992	3360402	0.000110986	-1.35678	0.21936	1.15213	0.439382	-1.17763	0.499247	0.239	0.617606	0.687548	0.999878
CADM2	2631556	ILMN_1664679	4150471	-0.000190325	0.0864869	-0.162666	0.413295	0.471527	0.209262	-0.344977	0.834252	0.730111	0.964308	0.999878
CADM3	2362469	ILMN_1701827	3450446	0.00107216	-2.33978	-0.760149	1.06036	0.455347	-2.20658	-1.66938	0.0273883	0.0950414	0.296522	0.999878
CADM4	3864519	ILMN_1812096	6420019	-0.000142746	0.239823	-0.491443	0.847987	0.512923	0.282815	-0.958122	0.777331	0.338001	0.946917	0.999878
CADPS	2679406	ILMN_1809972	450681	-0.000125182	1.19731	0.251687	1.0514	0.602815	1.13877	0.417519	0.254853	0.676299	0.698802	0.999878
CADPS2	3070309	ILMN_1801370	990494	-0.000171612	-0.511331	-0.268533	1.05366	0.530801	-0.485288	-0.505902	0.627493	0.612925	0.904893	0.999878
CALB1	3144033	ILMN_1760199	4640240	-0.00015732	0.105593	0.148827	0.45409	0.592102	0.232537	0.251354	0.81613	0.80154	0.959114	0.999878
CALB2	3667508	ILMN_1748840	5860039	-0.000193486	-0.0462897	0.0554994	0.738771	0.489536	-0.0626576	0.113371	0.950042	0.909736	0.991925	0.999878
CALCA	3364127	ILMN_1702566	7650386	0.000168942	0.919118	-0.428013	0.614199	0.476594	1.49645	-0.898066	0.134599	0.36915	0.558028	0.999878
CALCB	3321592	ILMN_2109371	2230053	-0.000191295	0.0260283	-0.536904	0.444411	0.513284	0.0585681	-1.04602	0.953298	0.295554	0.991925	0.999878
CALCOCO2	3725392	ILMN_1755504	5820646	0.000527318	1.09219	-0.0702309	0.588847	0.354601	1.85479	-0.198056	0.0636841	0.843001	0.421645	0.999878
CALCR	3061538	ILMN_1710219	110239	-0.000139465	0.604719	-0.0932135	0.87953	0.574109	0.687549	-0.162362	0.491769	0.871021	0.846303	0.999878
CALCRL	2591367	ILMN_1758281	990300	6.1e-05	-0.453845	0.103893	0.404303	0.518201	-1.12254	0.200487	0.261688	0.841099	0.70368	0.999878
CALHM1	3304785	ILMN_1679130	5340520	-0.000140592	0.289396	0.288092	0.854003	0.453212	0.33887	0.635668	0.734722	0.524993	0.938309	0.999878
CALHM3	3304797	ILMN_1661022	6180450	-0.00011809	0.239702	0.402314	0.54097	0.470739	0.443097	0.854643	0.657714	0.392749	0.915182	0.999878
CALM2	2551924	ILMN_1687858	7100711	-3.62e-06	0.608692	-0.0756334	0.466502	0.128252	1.3048	-0.589725	0.192021	0.555375	0.640957	0.999878
CALM3	3836841	ILMN_1666385	2750184	-0.000165527	0.194611	0.0729912	0.897777	0.193396	0.216769	0.377418	0.828397	0.705863	0.962692	0.999878
CALML3	3233242	ILMN_1733333	2320600	-0.000185223	-0.202165	-0.572969	0.627468	0.567889	-0.322192	-1.00894	0.74732	0.313001	0.940002	0.999878
CALML4	3630668	ILMN_1757210	4610209	-1.54e-05	-0.476672	0.164221	0.560733	0.382078	-0.850087	0.42981	0.395317	0.667334	0.798692	0.999878
CALML6	2316218	ILMN_1739162	2600521	-0.000171685	-0.175242	0.129379	0.295024	0.53478	-0.593992	0.24193	0.552544	0.808834	0.874693	0.999878
CALN1	3055466	ILMN_1749034	4560274	-0.000199682	-0.0355827	-0.164849	0.767491	0.44425	-0.0463624	-0.371073	0.963023	0.710584	0.993051	0.999878
CALR	3822049	ILMN_1736256	2760370	-9.51e-05	0.607573	0.226007	0.636647	0.265049	0.954332	0.852699	0.339961	0.393826	0.761542	0.999878
CALU	3023060	ILMN_1727194	940431	-0.000125242	0.566695	0.604528	0.566105	0.395705	1.00104	1.52772	0.316854	0.126581	0.743308	0.999878
CAMK1	2662331	ILMN_2140990	4610338	2.1e-06	0.831286	-0.407208	0.80095	0.267208	1.03787	-1.52394	0.299378	0.127525	0.72976	0.999878
CAMK1D	3235516	ILMN_2280721	4780452	-0.000185672	0.0830321	-0.534818	0.489899	0.485867	0.169488	-1.10075	0.865419	0.271005	0.970075	0.999878
CAMK2B	3048517	ILMN_1663397	6220484	5.26e-05	-0.826944	0.114716	1.04754	0.566723	-0.789415	0.202419	0.429907	0.839589	0.819398	0.999878
CAMK2D	2782545	ILMN_1658818	6480050	-0.000110196	-0.484551	0.544204	0.54927	0.586906	-0.882172	0.927241	0.377726	0.353801	0.785977	0.999878
CAMK2N1	2400177	ILMN_1794863	4060008	-0.000198285	0.000418677	-0.111338	0.399383	0.314371	0.00104831	-0.35416	0.999164	0.723219	0.99956	0.999878
CAMK2N2	2708429	ILMN_1660633	2940142	-0.000174673	-0.186214	-0.268242	0.703833	0.571677	-0.264571	-0.469219	0.791351	0.638913	0.950434	0.999878
CAMK4	2823880	ILMN_1767168	5420132	0.000391175	-0.740022	-0.326479	0.392335	0.433421	-1.8862	-0.75326	0.0593258	0.451294	0.412984	0.999878
CAMKMT	2479746	ILMN_1738099	4120356	-0.000193562	0.0423093	0.0590346	0.593091	0.46955	0.0713369	0.125726	0.943132	0.899949	0.99055	0.999878
CAMKV	2674845	ILMN_1667381	5310343	-0.000110651	0.686368	-0.447122	0.934906	0.518857	0.734158	-0.861743	0.462887	0.388829	0.835503	0.999878
CAMLG	2829463	ILMN_1714599	6660092	-0.000197646	0.0221444	0.178861	0.489066	0.20784	0.045279	0.860573	0.963887	0.389473	0.993147	0.999878
CAMP	2621574	ILMN_1688580	5860075	0.000426151	1.00541	0.033852	0.638688	0.0647851	1.57419	0.522528	0.115507	0.601303	0.530638	0.999878
CAMSAP1	3229529	ILMN_1811957	1340411	-0.000181053	0.22869	0.0151079	0.735947	0.470895	0.310742	0.0320834	0.75601	0.974406	0.941916	0.999878
CAMSAP2	2374345	ILMN_1792660	6280209	8.54e-05	0.546215	-0.963683	0.55538	0.453103	0.983497	-2.12685	0.32541	0.0334324	0.750679	0.999878
CAMTA1	2318455	ILMN_1661940	3930411	-0.000206978	0.0863205	0.318342	0.461098	0.444176	0.187207	0.716704	0.851506	0.473557	0.967074	0.999878
CAND1	3420713	ILMN_1744647	240162	-0.000131724	0.398271	-0.144707	0.805193	0.348395	0.494629	-0.415355	0.620884	0.677882	0.902056	0.999878
CANT1	3772775	ILMN_1664012	5860358	0.000639019	-1.72376	0.0343739	0.808065	0.244505	-2.13319	0.140586	0.0329572	0.888197	0.316947	0.999878
CAP1	2331727	ILMN_1797604	1070754	-0.000191153	0.0642781	0.0704652	0.630745	0.164535	0.101908	0.428269	0.918833	0.668455	0.983436	0.999878
CAP2	2896888	ILMN_1691237	3930592	-0.000141768	-0.380127	-0.327127	0.741935	0.479244	-0.512346	-0.682591	0.608432	0.494865	0.895627	0.999878
CAPN1	3334954	ILMN_1705261	1570672	-0.00016966	-0.917743	0.0620444	0.900466	0.196088	-1.01919	0.316411	0.308163	0.751691	0.736439	0.999878
CAPN11	2908371	ILMN_1765274	2810136	0.000276001	-1.00287	-0.202162	0.841694	0.491501	-1.19149	-0.411316	0.233518	0.680841	0.682638	0.999878
CAPN12	3861503	ILMN_1787514	6400022	-9.45e-05	0.919332	0.267216	1.19178	0.400464	0.771395	0.667265	0.440509	0.504603	0.825346	0.999878
CAPN13	2546795	ILMN_1677108	450750	-0.000148801	-0.39522	-0.353999	0.974357	0.548792	-0.405621	-0.645051	0.685038	0.518894	0.923108	0.999878
CAPN15	3642946	ILMN_1763739	5720382	3.43e-06	-1.23819	0.5798	1.31712	0.323127	-0.940075	1.79434	0.347224	0.072759	0.763864	0.999878
CAPN2	2382117	ILMN_1716057	70646	0.00144349	1.54552	0.621351	0.580292	0.407687	2.66335	1.52409	0.00776128	0.127486	0.160418	0.999878
CAPN5	3341155	ILMN_1737089	6760661	0.000627494	1.08116	0.603791	0.688315	0.389226	1.57073	1.55126	0.116308	0.120839	0.530845	0.999878
CAPN7	2612278	ILMN_1685022	2680168	-0.000192448	-0.334895	-0.0278659	0.919663	0.444728	-0.36415	-0.0626584	0.715761	0.950039	0.932827	0.999878
CAPN9	2385012	ILMN_1690923	7550762	-0.000189929	1.01785	0.130475	1.0071	0.599789	1.01068	0.217535	0.312219	0.827791	0.740599	0.999878
CAPNS2	3661758	ILMN_1699809	2850241	-0.000166627	0.0859468	-0.101165	0.256049	0.472767	0.335665	-0.213986	0.737138	0.830558	0.938799	0.999878
CAPS	3818193	ILMN_2286400	2650474	-0.000196489	-0.223337	0.211957	0.747117	0.47756	-0.298932	0.443834	0.765004	0.657163	0.944376	0.999878
CAPS2	3462630	ILMN_1747105	6110114	-0.000197343	-0.342381	-0.0734127	0.541963	0.528198	-0.631742	-0.138987	0.527584	0.88946	0.865422	0.999878
CAPSL	2853275	ILMN_2267508	5960379	-0.000198752	-0.00844408	0.829746	0.666804	0.46252	-0.0126635	1.79397	0.989897	0.0728183	0.997984	0.999878
CAPZA2	3020444	ILMN_1768870	5090403	-0.000200034	-0.00768889	0.0573829	0.506053	0.137305	-0.0151939	0.417922	0.987878	0.676004	0.997984	0.999878
CAPZA3	3407016	ILMN_2069196	4610324	0.000823882	0.738693	0.206719	0.307722	0.465032	2.40052	0.444526	0.0164079	0.656662	0.228026	0.999878
CARD10	3960133	ILMN_1743714	3840678	-2.38e-05	-0.900319	0.0821245	1.29618	0.483117	-0.694592	0.169989	0.487343	0.865019	0.84311	0.999878
CARD11	3035990	ILMN_1721978	4670279	0.000296335	1.48882	0.374121	0.762451	0.277505	1.95267	1.34816	0.0509137	0.177608	0.386585	0.999878
CARD16	3389450	ILMN_1724474	5270725	-0.000146262	-0.118399	-0.31016	0.293165	0.42648	-0.403864	-0.727256	0.68633	0.467069	0.923192	0.999878
CARD18	3389473	ILMN_1692349	4280288	-0.000196478	0.151777	-0.190401	0.370514	0.576708	0.409639	-0.330151	0.682088	0.741286	0.922569	0.999878
CARD6	2807686	ILMN_1779854	450047	-4.11e-05	0.385356	0.396143	0.528127	0.483817	0.729665	0.818787	0.465629	0.412908	0.835568	0.999878
CARHSP1	3679533	ILMN_1809477	1230348	-0.000164532	0.0653339	0.0568226	0.35325	0.164097	0.184951	0.346274	0.853275	0.729137	0.967855	0.999878
CARM1	3820865	ILMN_1680134	460382	0.00241146	1.60205	0.133979	0.465087	0.0879399	3.44462	1.52353	0.000576532	0.127627	0.041302	0.999878
CARS	3359529	ILMN_1696066	20010	-0.000154461	-0.28728	-0.557557	0.872335	0.383234	-0.329323	-1.45487	0.741925	0.145705	0.939241	0.999878
CARS2	3525538	ILMN_1765222	160403	-1.92e-05	-0.974384	-0.240088	0.831726	0.348695	-1.17152	-0.688534	0.241445	0.491117	0.690908	0.999878
CARTPT	2814693	ILMN_1702296	3830598	-0.000177336	0.159986	-0.545529	0.565645	0.563785	0.282838	-0.967618	0.777312	0.333235	0.946917	0.999878
CASC1	3447798	ILMN_1708983	540041	0.000168534	-1.02211	-0.0920786	0.538972	0.556344	-1.8964	-0.165507	0.0579646	0.868545	0.409182	0.999878
CASC2	3266583	ILMN_1808546	5960187	-0.000194043	0.0964894	-0.157808	0.728983	0.572171	0.132362	-0.275806	0.894704	0.782697	0.977441	0.999878
CASC3	3720739	ILMN_1665004	2970463	7.46e-05	0.967666	0.129184	0.83309	0.189919	1.16154	0.680205	0.245478	0.496375	0.692581	0.999878
CASC4	3591838	ILMN_1686948	60241	-0.000205271	-0.13569	-0.485247	0.67299	0.553352	-0.201622	-0.876924	0.84022	0.380528	0.965356	0.999878
CASC5	3590014	ILMN_2357471	1050204	-0.000104282	0.229769	0.393034	0.447494	0.601064	0.513458	0.653897	0.607654	0.513178	0.895239	0.999878
CASD1	3013178	ILMN_2139035	6020520	0.000686988	-1.27735	0.180656	0.603275	0.474215	-2.11736	0.380958	0.034278	0.703235	0.32356	0.999878
CASK	4005859	ILMN_1654773	1660424	-1.29e-05	-0.612834	-0.662431	0.69712	0.468476	-0.879093	-1.41401	0.379393	0.157358	0.786594	0.999878
CASKIN1	3676557	ILMN_1679039	6860528	-0.00016907	0.447048	-0.776532	1.44147	0.517251	0.310133	-1.50127	0.756472	0.133287	0.942155	0.999878
CASP10	2522693	ILMN_2321720	7100301	0.00340029	2.34394	-0.89496	0.596409	0.436281	3.93009	-2.05134	8.61e-05	0.0402338	0.0142047	0.999878
CASP12	3389257	ILMN_2132119	2640634	0.000957705	1.77423	0.0218341	0.625798	0.476259	2.83515	0.0458449	0.00459865	0.963434	0.122496	0.999878
CASP14	3822976	ILMN_1739513	5670300	-0.000203868	0.0256022	-0.24386	0.603379	0.476916	0.0424313	-0.511326	0.966157	0.609123	0.994124	0.999878
CASP2	3029030	ILMN_2410540	3360059	-0.000198699	0.0321615	0.0193784	0.86941	0.207269	0.0369923	0.0934939	0.970493	0.925511	0.995497	0.999878
CASP3	2796484	ILMN_1731639	6330445	-4.76e-05	0.296874	-0.964059	0.501543	0.470565	0.591921	-2.04873	0.55393	0.0404887	0.874932	0.999878
CASP5	3389330	ILMN_1722158	3390121	0.000889438	-0.635718	-0.572179	0.245563	0.307295	-2.58882	-1.86199	0.0096582	0.0626052	0.18056	0.999878
CASP6	2781693	ILMN_1694877	5550709	0.0010791	1.06421	-0.842126	0.421012	0.352079	2.52773	-2.39187	0.0115105	0.0167628	0.193408	0.999878
CASP7	3264948	ILMN_1730332	7650324	-0.00018436	-0.09487	0.180261	0.573629	0.43205	-0.165386	0.417223	0.868647	0.676515	0.971344	0.999878
CASP8AP2	2916952	ILMN_1747129	1050524	0.000258365	-1.05115	-0.813868	0.598315	0.615608	-1.75685	-1.32206	0.0790043	0.18615	0.457696	0.999878
CASQ1	2362991	ILMN_1813949	7150053	-0.000193473	-0.0827853	0.335801	0.655679	0.462917	-0.126259	0.725403	0.899532	0.468205	0.978829	0.999878
CASQ2	2429556	ILMN_1722329	6620035	-0.000197519	-0.0127986	-0.478844	0.768665	0.464434	-0.0166505	-1.03103	0.986716	0.302528	0.997902	0.999878
CASR	2638824	ILMN_1767711	2940594	-2.73e-05	-0.597064	0.190747	0.820671	0.557038	-0.727531	0.342431	0.466934	0.732026	0.835669	0.999878
CAT	3326400	ILMN_1651705	4040364	0.000533964	-0.831034	-0.172429	0.445987	0.112497	-1.86336	-1.53274	0.0624697	0.12534	0.420123	0.999878
CATSPER1	3378043	ILMN_1789394	6590544	0.00127483	-3.03578	-0.323263	1.03135	0.390364	-2.9435	-0.828104	0.00326006	0.407611	0.101579	0.999878
CATSPER2P1	3621594	ILMN_2186351	5570561	-0.00018402	-0.239169	0.181449	0.48641	0.425006	-0.491702	0.426933	0.622951	0.669428	0.903411	0.999878
CATSPER3	2829624	ILMN_1693961	6400279	-7.73e-05	0.515289	0.0982148	0.518783	0.528916	0.993264	0.185691	0.320629	0.852687	0.746731	0.999878
CATSPERB	3576633	ILMN_1762091	7040603	-0.000240516	-0.419121	-0.535824	0.812456	0.607009	-0.515869	-0.882728	0.605968	0.377383	0.894948	0.999878
CATSPERD	3818091	ILMN_1702739	7650546	-0.000203669	0.279853	0.172457	1.12038	0.484019	0.249785	0.356302	0.802764	0.721614	0.953218	0.999878
CATSPERG	3832308	ILMN_1800031	6110440	0.000573378	-2.4916	-0.23578	1.1728	0.49851	-2.12449	-0.47297	0.0336778	0.636234	0.320551	0.999878
CAV1	3020302	ILMN_2149226	1070215	-0.000181812	-0.0741781	-0.274144	0.533059	0.413569	-0.139156	-0.662874	0.889333	0.507411	0.976093	0.999878
CAV3	2609462	ILMN_1804980	3130020	-0.000177129	-0.087265	0.505119	0.558267	0.571726	-0.156314	0.883497	0.875792	0.376968	0.972981	0.999878
CBFB	3665116	ILMN_2399489	6420639	-0.000108032	-0.586294	0.0477018	0.784375	0.482725	-0.747466	0.0988178	0.454817	0.921283	0.832714	0.999878
CBL	3352070	ILMN_1716080	4120037	-0.000201208	-0.324587	-0.470006	0.752794	0.315401	-0.431177	-1.49019	0.666358	0.136175	0.917857	0.999878
CBLB	2687255	ILMN_1685580	5270132	0.00238908	2.04811	0.176161	0.591252	0.246584	3.46403	0.714406	0.000536583	0.474976	0.041302	0.999878
CBLC	3835751	ILMN_1811729	3870471	-0.000193333	0.271406	0.441783	0.925983	0.526093	0.2931	0.839742	0.769458	0.401053	0.945251	0.999878
CBLL1	3018652	ILMN_2073732	4070608	1.92e-05	-0.688135	-0.613901	0.646663	0.346357	-1.06413	-1.77245	0.28732	0.0763194	0.722798	0.999878
CBLN1	3690747	ILMN_1712461	2140113	-0.00021124	-0.162478	-0.0865609	0.536613	0.422928	-0.302785	-0.204671	0.762067	0.83783	0.943968	0.999878
CBLN2	3812864	ILMN_1796069	670019	-0.000220011	-0.83993	0.255834	0.909655	0.45947	-0.92335	0.556803	0.355869	0.577662	0.769326	0.999878
CBLN3	3558270	ILMN_2053829	6620291	0.000371965	1.01912	-0.26574	0.66244	0.401173	1.53844	-0.662408	0.124004	0.507709	0.542762	0.999878
CBLN4	3910724	ILMN_1699768	4640315	0.000291886	-1.25444	-0.222264	0.761458	0.582064	-1.64742	-0.381855	0.0995344	0.702569	0.49706	0.999878
CBR1	3919785	ILMN_1809003	3060162	-0.000142219	-0.439032	-0.493252	0.391613	0.457015	-1.12109	-1.07929	0.262305	0.280458	0.70368	0.999878
CBR3	3919834	ILMN_1652237	5560543	-0.000102072	0.218154	-0.486346	0.283282	0.406986	0.770096	-1.19499	0.441279	0.232089	0.825557	0.999878
CBR4	2793054	ILMN_1813400	5810750	-0.000176949	0.0975002	0.00236036	0.511595	0.333121	0.190581	0.00708559	0.848862	0.994347	0.96645	0.999878
CBS	3933923	ILMN_1804735	1230047	0.000153008	-0.875088	-0.198552	0.995122	0.219251	-0.879378	-0.90559	0.379238	0.365153	0.786594	0.999878
CBX1	3761127	ILMN_1770244	1070386	-3.25e-05	-0.436188	-0.707723	0.538204	0.294897	-0.810451	-2.3999	0.417719	0.0163997	0.811173	0.999878
CBX2	3736985	ILMN_1686237	6400408	-0.000127447	-0.507069	-0.257508	0.600406	0.499465	-0.844543	-0.515568	0.398406	0.606156	0.799599	0.999878
CBX3	2993639	ILMN_1774086	380270	0.000840506	-1.36755	0.260859	0.584487	0.190638	-2.33975	1.36835	0.0193355	0.171203	0.248129	0.999878
CBX4	3773174	ILMN_1724145	3830170	0.000631493	-2.09537	-0.528911	1.05227	0.338237	-1.99128	-1.56373	0.0465045	0.117881	0.370621	0.999878
CBX5	3456630	ILMN_1813028	7150685	-0.000197255	0.0193431	0.24769	0.45202	0.3571	0.0427926	0.693614	0.965869	0.487924	0.993932	0.999878
CBX6	3960930	ILMN_1691930	3370288	-0.000207006	0.138761	-0.0524826	0.668	0.23347	0.207726	-0.224793	0.835452	0.82214	0.964308	0.999878
CBX7	3961023	ILMN_1657361	1500747	0.000729729	-1.0606	-0.296262	0.578565	0.242292	-1.83315	-1.22275	0.0668394	0.221424	0.429737	0.999878
CBX8	3773149	ILMN_1775183	1410475	-0.000208191	0.152509	-0.85348	0.802444	0.500439	0.190056	-1.70546	0.849273	0.0881083	0.96645	0.999878
CBY1	3945349	ILMN_1730879	510100	-0.000206345	-0.0576157	-0.249629	0.521605	0.428825	-0.110458	-0.582122	0.91205	0.560484	0.981773	0.999878
CC2D1A	3822444	ILMN_1701127	7650746	0.000207516	2.00978	-0.173523	1.35004	0.452773	1.48868	-0.383245	0.136634	0.701538	0.559753	0.999878
CC2D1B	2412740	ILMN_2149935	730497	-4.99e-05	-0.854497	-0.229303	0.9011	0.402631	-0.948282	-0.569512	0.343031	0.569009	0.76201	0.999878
CC2D2B	3259367	ILMN_1809342	7550239	-0.000112713	-0.485341	0.292006	0.583919	0.603445	-0.831179	0.483899	0.405912	0.628458	0.804905	0.999878
CCAR1	3249788	ILMN_1679127	270291	3.43e-05	1.05364	-0.401647	0.823511	0.457211	1.27945	-0.878472	0.200799	0.379688	0.650936	0.999878
CCBE1	3810542	ILMN_2122511	3370300	-2.72e-05	-0.504094	-0.137771	0.736377	0.169319	-0.68456	-0.813677	0.493653	0.41583	0.847488	0.999878
CCDC101	3686587	ILMN_1701477	1240113	-8.1e-05	0.461781	-0.109862	0.629118	0.424728	0.734013	-0.258664	0.462975	0.795895	0.835503	0.999878
CCDC102A	3693240	ILMN_1796762	1660681	-0.000158855	-0.734219	0.0644585	0.920095	0.327853	-0.797982	0.196608	0.424918	0.844134	0.817052	0.999878
CCDC104	2483016	ILMN_2103014	4390072	-0.000289591	0.449998	-0.153675	0.528965	0.529458	0.850714	-0.290249	0.394969	0.771625	0.798417	0.999878
CCDC105	3822961	ILMN_1677859	5870414	0.000218838	1.27085	-0.175838	0.842363	0.601011	1.50867	-0.292571	0.131446	0.76985	0.552361	0.999878
CCDC106	3842327	ILMN_1682567	3940471	0.000366984	-1.75351	-0.129694	0.960238	0.315142	-1.82612	-0.411541	0.0678906	0.680676	0.430977	0.999878
CCDC107	3168032	ILMN_1709630	4760398	0.00040122	1.3276	-0.12048	0.910755	0.394451	1.45769	-0.305436	0.144988	0.760034	0.571722	0.999878
CCDC108	2599704	ILMN_1806488	2320528	0.000106316	-0.534979	0.67056	0.477498	0.523716	-1.12038	1.28039	0.262606	0.200409	0.70368	0.999878
CCDC109B	2739160	ILMN_1801766	1780259	5.17e-05	-0.389861	-0.236681	0.507655	0.185349	-0.767964	-1.27695	0.442545	0.201621	0.825809	0.999878
CCDC11	3807732	ILMN_1746949	130079	-3.73e-05	0.406591	-1.04902	0.501335	0.58905	0.811016	-1.78087	0.417395	0.0749344	0.810886	0.999878
CCDC110	2796911	ILMN_2163206	4560433	-0.000124951	0.485652	0.179992	0.690536	0.581456	0.703297	0.309555	0.481903	0.7569	0.841951	0.999878
CCDC111	2754371	ILMN_1716368	770768	3.91e-05	-0.5747	-0.390445	0.558898	0.500242	-1.02827	-0.780512	0.30387	0.435089	0.732474	0.999878
CCDC112	2871717	ILMN_1761101	1710026	0.00100053	-1.22632	-0.615478	0.507532	0.443869	-2.41624	-1.38662	0.0157173	0.165557	0.224134	0.999878
CCDC113	3663181	ILMN_1775520	4590100	5.18e-05	0.789601	0.803941	0.758104	0.459846	1.04155	1.74828	0.297672	0.0804154	0.729057	0.999878
CCDC114	3867032	ILMN_1658376	7210482	0.000597457	-1.44275	0.426444	0.743239	0.572879	-1.94117	0.744389	0.0522939	0.456641	0.391879	0.999878
CCDC115	2575980	ILMN_1730347	5910095	-1.88e-06	-0.480837	-0.487101	0.708702	0.321372	-0.678475	-1.51569	0.497502	0.129597	0.849376	0.999878
CCDC116	3938215	ILMN_1795085	1430576	-0.000129849	0.751752	0.208841	0.864832	0.416344	0.869246	0.501607	0.384754	0.615944	0.790963	0.999878
CCDC117	3941643	ILMN_2059606	990110	4.18e-05	0.547802	-0.372755	0.653457	0.544627	0.838314	-0.684423	0.401894	0.493708	0.802331	0.999878
CCDC121	2545999	ILMN_1791424	830605	4.65e-05	-0.514119	0.383436	0.370472	0.476637	-1.38774	0.804461	0.165278	0.421131	0.604063	0.999878
CCDC124	3824648	ILMN_1811775	2070537	-0.00018638	0.279012	-0.118007	0.659034	0.463024	0.423365	-0.254861	0.672047	0.79883	0.920234	0.999878
CCDC126	2992963	ILMN_1751264	7000332	-0.000206703	-0.0772497	-0.136555	0.420439	0.368623	-0.183736	-0.370445	0.854228	0.711051	0.968138	0.999878
CCDC127	2845274	ILMN_2214955	2070164	-4.42e-05	0.263183	-0.643243	0.330331	0.445234	0.796723	-1.44473	0.425649	0.148534	0.817052	0.999878
CCDC13	2670903	ILMN_1669621	5220301	-0.000193344	0.333101	-0.0540307	1.01219	0.468271	0.329089	-0.115383	0.742102	0.908141	0.939241	0.999878
CCDC130	3822287	ILMN_1758633	3830538	-0.000191713	-0.138069	0.170236	0.850598	0.219451	-0.16232	0.775735	0.87106	0.437905	0.971787	0.999878
CCDC132	3012819	ILMN_1716342	460682	0.00030833	-0.922879	-0.557324	0.523724	0.359184	-1.76215	-1.55164	0.0781052	0.120748	0.456435	0.999878
CCDC134	3947096	ILMN_1809883	2640132	-0.000181294	-0.376092	-0.494095	0.580918	0.594483	-0.64741	-0.831135	0.517396	0.405897	0.860594	0.999878
CCDC135	3662876	ILMN_1792152	1340471	-5.32e-05	-0.843796	0.454094	0.888332	0.530464	-0.949866	0.856032	0.342226	0.39198	0.76201	0.999878
CCDC136	3023103	ILMN_1706935	7100364	-0.000156748	-0.282613	0.38607	0.90083	0.404299	-0.313725	0.95491	0.753743	0.339623	0.941545	0.999878
CCDC137	3738110	ILMN_1743506	7100681	0.000400653	1.44632	0.574427	0.710145	0.463361	2.03665	1.2397	0.0417369	0.215087	0.350718	0.999878
CCDC138	2499234	ILMN_1767260	6960189	5.41e-05	-0.636893	0.67328	0.566755	0.502894	-1.12375	1.33881	0.261172	0.180633	0.70368	0.999878
CCDC14	2692573	ILMN_1677239	4390612	-0.000198968	-0.0278477	-0.239905	0.708647	0.322975	-0.039297	-0.742797	0.968655	0.457604	0.995085	0.999878
CCDC141	2589868	ILMN_1693711	3360082	-0.000116972	-0.307851	0.64723	0.48589	0.579994	-0.633581	1.11593	0.526383	0.264454	0.864721	0.999878
CCDC142	2560149	ILMN_1714936	3930538	2.94e-05	-0.681114	0.272302	0.728359	0.467497	-0.935134	0.582469	0.349764	0.560251	0.765744	0.999878
CCDC144NL	3749451	ILMN_1809491	270070	1.7e-05	-0.303958	-0.805623	0.254314	0.513517	-1.19521	-1.56883	0.232063	0.116686	0.680214	0.999878
CCDC146	3009838	ILMN_1790555	4860133	-0.000199711	-0.0342338	-0.294476	0.356066	0.397594	-0.0961446	-0.740644	0.92341	0.458909	0.984457	0.999878
CCDC148	2582701	ILMN_1663816	1300164	0.000871806	-1.9978	0.153973	0.85819	0.540751	-2.32793	0.284739	0.0199553	0.775844	0.252654	0.999878
CCDC15	3354389	ILMN_1825660	6200593	-0.000180536	-0.142242	0.270653	0.469093	0.457055	-0.303229	0.592168	0.761728	0.553738	0.943968	0.999878
CCDC150	2521239	ILMN_1771696	3710246	-0.000235871	0.161418	0.588835	0.493462	0.430051	0.327112	1.36922	0.743596	0.170931	0.939446	0.999878
CCDC151	3850929	ILMN_1743095	4260615	-0.000180246	-0.112949	-0.440437	0.845979	0.595951	-0.133512	-0.739049	0.893793	0.459877	0.977244	0.999878
CCDC155	3838444	ILMN_1660007	4010601	-0.000227851	-0.832234	-0.156578	1.00138	0.447984	-0.831088	-0.349516	0.405963	0.726702	0.804905	0.999878
CCDC158	2774123	ILMN_1727511	6900747	-0.000199021	0.00509988	-0.451021	0.774373	0.540644	0.00658581	-0.83423	0.994746	0.404152	0.998436	0.999878
CCDC17	2410283	ILMN_1787441	4830494	-0.000202672	-0.139929	-0.398909	0.981649	0.605053	-0.142545	-0.659296	0.886655	0.509706	0.975527	0.999878
CCDC170	2931700	ILMN_1772588	4640398	-7.65e-05	-0.571274	-0.639569	0.569888	0.514454	-1.00243	-1.2432	0.316183	0.213794	0.743041	0.999878
CCDC171	3163200	ILMN_1764188	3610040	-0.000197031	0.0389862	0.347678	0.78971	0.493468	0.0493677	0.704561	0.960628	0.481083	0.992947	0.999878
CCDC174	2611981	ILMN_1750144	6960170	4e-05	0.340264	-0.0120558	0.307514	0.36426	1.1065	-0.0330967	0.268564	0.973597	0.708605	0.999878
CCDC176	3543979	ILMN_2147345	830681	0.00191695	0.676011	0.469221	0.214325	0.393935	3.15414	1.19111	0.00161918	0.23361	0.0676541	0.999878
CCDC177	3570218	ILMN_1775121	3940360	0.000125795	-0.417403	0.381829	0.393094	0.441096	-1.06184	0.865636	0.288359	0.38669	0.722899	0.999878
CCDC18	2347023	ILMN_1804953	6770541	-0.000102077	0.174501	-0.5702	0.323423	0.494641	0.539545	-1.15275	0.589534	0.249012	0.888329	0.999878
CCDC181	2443305	ILMN_1777963	6550240	0.000134555	-1.1758	0.401649	0.701123	0.439882	-1.67703	0.913084	0.0935994	0.361198	0.486841	0.999878
CCDC22	3977083	ILMN_1781234	5490411	-0.000196289	-0.02953	0.0161694	1.2628	0.392507	-0.0233845	0.0411952	0.981344	0.96714	0.997739	0.999878
CCDC23	2409069	ILMN_2050023	630086	1.53e-05	0.140352	0.0448393	0.164937	0.112226	0.850941	0.399545	0.394842	0.689492	0.79833	0.999878
CCDC24	2333707	ILMN_1718771	2320402	-0.000190205	-0.109343	0.253302	0.981342	0.42317	-0.111422	0.598583	0.911287	0.549451	0.981766	0.999878
CCDC25	3129121	ILMN_1793146	2000288	-0.0002009	-0.09947	-0.288367	0.444508	0.421113	-0.223775	-0.684773	0.822941	0.493487	0.960709	0.999878
CCDC27	2317472	ILMN_1811167	1240682	-0.000195497	0.171146	-0.045762	1.12842	0.469407	0.151669	-0.0974889	0.879454	0.922338	0.97358	0.999878
CCDC28A	2927873	ILMN_1798659	2000504	-0.000135167	0.310749	-0.0413901	0.54655	0.291787	0.568564	-0.14185	0.569677	0.887198	0.880411	0.999878
CCDC28B	2328750	ILMN_2099586	6200561	-0.000181964	-0.277837	0.58125	0.691832	0.407775	-0.401596	1.42542	0.687999	0.154037	0.923533	0.999878
CCDC33	3601538	ILMN_1681136	830465	7.88e-05	1.17233	0.536523	0.862577	0.466116	1.3591	1.15105	0.174177	0.249711	0.615492	0.999878
CCDC34	3367036	ILMN_1803490	2470025	0.00218318	1.94056	-0.00782897	0.594156	0.474513	3.26607	-0.016499	0.0010978	0.986836	0.056283	0.999878
CCDC37	2640379	ILMN_1770493	7570682	-0.000192253	0.289926	0.0915352	0.807913	0.587543	0.358858	0.155793	0.719716	0.876196	0.933541	0.999878
CCDC38	3466634	ILMN_1687813	2760021	-0.000271024	-0.284135	0.24125	0.759829	0.468324	-0.373946	0.515135	0.708461	0.606459	0.9299	0.999878
CCDC41	3466110	ILMN_2406716	5050465	7.89e-05	-0.784171	-0.594548	0.561331	0.563355	-1.39699	-1.05537	0.16248	0.291256	0.599289	0.999878
CCDC42	3744589	ILMN_2214562	2850746	-0.000194808	-0.1381	0.0397983	0.680624	0.415919	-0.202902	0.0956878	0.83922	0.923769	0.964766	0.999878
CCDC43	3759305	ILMN_1743783	5550187	3.69e-05	0.529551	-0.143365	0.41057	0.407385	1.28979	-0.351916	0.197181	0.724901	0.646428	0.999878
CCDC47	3766334	ILMN_1804522	1850367	0.000151717	-0.945676	-0.0173349	0.724269	0.397131	-1.3057	-0.0436502	0.191715	0.965183	0.640469	0.999878
CCDC50	2657981	ILMN_1738333	3710722	-0.000224608	0.134151	0.294982	0.494159	0.469657	0.271473	0.628079	0.786039	0.529952	0.948832	0.999878
CCDC51	2673257	ILMN_1799579	4290259	0.000272099	0.75113	0.188107	0.47366	0.380414	1.5858	0.494481	0.112847	0.620967	0.525071	0.999878
CCDC53	3468225	ILMN_1715569	7040544	0.000686903	-0.769247	-0.237956	0.417288	0.303896	-1.84344	-0.783017	0.0653228	0.433617	0.426853	0.999878
CCDC54	2634919	ILMN_1707311	6900767	0.000471753	-0.771916	-0.724798	0.434152	0.446974	-1.77798	-1.62157	0.0754669	0.104896	0.450029	0.999878
CCDC57	3774701	ILMN_1716546	2600670	0.000119598	1.00141	0.203247	0.663768	0.453635	1.50868	0.448041	0.131444	0.654123	0.552361	0.999878
CCDC59	3464000	ILMN_1662318	1780730	-5.04e-05	-0.177044	-0.347674	0.310177	0.272821	-0.570784	-1.27437	0.568172	0.202534	0.879895	0.999878
CCDC6	3290785	ILMN_1745904	7330435	0.000120167	0.74055	0.292135	0.630287	0.367806	1.17494	0.794264	0.240074	0.427041	0.688844	0.999878
CCDC60	3434048	ILMN_1722446	2140544	-0.00012615	-0.598204	0.760687	0.838163	0.417173	-0.713709	1.82343	0.475441	0.0682378	0.838562	0.999878
CCDC62	3435515	ILMN_1701905	5490463	-0.000114547	-0.347829	0.298684	0.723145	0.51965	-0.480995	0.574779	0.630541	0.565441	0.905898	0.999878
CCDC63	3431701	ILMN_1773060	7050128	0.000342663	1.18141	0.175668	0.704751	0.586024	1.67635	0.299763	0.0937309	0.764358	0.487045	0.999878
CCDC64	3434193	ILMN_1653102	5310753	-0.000154739	-0.260183	0.281697	0.597328	0.533655	-0.435579	0.527863	0.663161	0.597594	0.916249	0.999878
CCDC65	3413643	ILMN_2227195	2370228	0.00035879	-0.913681	0.37565	0.608197	0.401583	-1.50228	0.935424	0.133088	0.34957	0.555494	0.999878
CCDC67	3344685	ILMN_1663062	5700379	0.000355949	-1.21637	0.448982	0.797638	0.597188	-1.52497	0.751827	0.12733	0.452155	0.548166	0.999878
CCDC68	3808745	ILMN_1815326	830494	0.000289695	0.869698	0.164024	0.53326	0.436586	1.63091	0.375697	0.102972	0.707143	0.506565	0.999878
CCDC69	2881860	ILMN_1657680	160068	0.00104131	1.68089	-0.124568	0.659541	0.314156	2.54858	-0.396516	0.0108458	0.691724	0.187108	0.999878
CCDC71L	3066956	ILMN_1696029	6980128	0.000344157	-0.92461	0.472733	0.721819	0.482002	-1.28094	0.980768	0.200272	0.326707	0.650305	0.999878
CCDC73	3368398	ILMN_1730745	5810280	-0.000211316	-0.0538183	-0.105439	0.476308	0.43981	-0.112991	-0.239738	0.910042	0.810533	0.981299	0.999878
CCDC77	3400190	ILMN_2101375	3850291	0.00197372	1.5713	0.155517	0.492632	0.423552	3.1896	0.367173	0.00143341	0.71349	0.06445	0.999878
CCDC78	3675333	ILMN_1811397	6450487	-0.000175303	0.280612	0.422906	1.2197	0.567199	0.230067	0.745605	0.818049	0.455906	0.959429	0.999878
CCDC79	3695235	ILMN_1697634	6560703	1.76e-05	0.634779	0.411134	0.799328	0.539664	0.79414	0.761833	0.427151	0.446159	0.817556	0.999878
CCDC8	3865973	ILMN_1760314	2940538	-9.69e-05	-0.470616	-0.210823	0.729598	0.587676	-0.645035	-0.358741	0.518934	0.719789	0.86114	0.999878
CCDC81	3343293	ILMN_1794534	1470148	-9.27e-05	0.34335	0.0843629	0.796049	0.543247	0.431318	0.155294	0.666256	0.87659	0.917857	0.999878
CCDC83	3343059	ILMN_1792296	6620377	-0.000198536	-0.282098	0.420727	0.70027	0.560187	-0.402841	0.751047	0.687082	0.452624	0.923533	0.999878
CCDC84	3351733	ILMN_1709227	6760762	-0.000118291	0.477824	-0.420425	0.74122	0.296693	0.644645	-1.41704	0.519187	0.156472	0.861143	0.999878
CCDC85B	3335719	ILMN_1657332	6400646	-0.000227733	0.455727	0.318625	0.749294	0.35248	0.608209	0.903951	0.543077	0.366021	0.870984	0.999878
CCDC85C	3579269	ILMN_1719774	5310102	-0.000193021	-0.300826	0.131737	0.952603	0.447779	-0.315794	0.294201	0.752172	0.768604	0.941402	0.999878
CCDC86	3332548	ILMN_1792681	650300	0.00130039	-2.04084	0.0310043	0.687642	0.375605	-2.96789	0.0825447	0.00301266	0.934214	0.096905	0.999878
CCDC87	3378368	ILMN_1706691	6940187	-4.22e-05	-0.90393	0.220265	0.719097	0.418827	-1.25703	0.525908	0.2088	0.598952	0.658475	0.999878
CCDC88B	3334518	ILMN_1772208	4860711	0.000413697	-2.21945	0.305614	1.38035	0.276368	-1.60788	1.10582	0.107923	0.268802	0.518118	0.999878
CCDC89	3385027	ILMN_1695972	3990564	-0.000179409	0.0927645	-0.0663371	0.336816	0.458739	0.275416	-0.144607	0.783008	0.885021	0.948562	0.999878
CCDC9	3837193	ILMN_1719190	4390255	0.00143812	-2.96065	0.260337	1.00494	0.501995	-2.94611	0.518606	0.00323272	0.604036	0.101444	0.999878
CCDC90B	3384471	ILMN_1692948	2750192	-0.000113945	0.547	-0.430257	0.551597	0.423172	0.991665	-1.01674	0.321409	0.309275	0.746731	0.999878
CCDC91	3409432	ILMN_2190051	6380373	-0.000197004	-0.16155	-0.539559	0.498381	0.437149	-0.32415	-1.23427	0.745838	0.217104	0.939767	0.999878
CCDC92	3476330	ILMN_1731107	4830682	-0.000185679	-0.148477	0.240324	0.411988	0.241557	-0.36039	0.994896	0.71857	0.319787	0.933064	0.999878
CCDC93	2572595	ILMN_1694269	2850392	0.000818349	1.00907	0.309033	0.41384	0.382752	2.4383	0.807397	0.0147909	0.419438	0.217433	0.999878
CCDC94	3817400	ILMN_1703430	2370601	0.000366565	1.26666	-0.43088	0.730616	0.336699	1.73368	-1.27972	0.0830359	0.200644	0.464739	0.999878
CCDC96	2759393	ILMN_1799710	4670463	-5.13e-05	0.336308	0.519855	0.462848	0.472289	0.726606	1.10071	0.467501	0.271022	0.836177	0.999878
CCDC97	3834149	ILMN_1801600	6650201	-0.000141842	-0.785873	-0.763887	0.631414	0.364835	-1.24462	-2.09379	0.213328	0.0362788	0.662546	0.999878
CCER1	3465188	ILMN_1758537	4050274	0.00195758	2.55426	-0.107234	0.757317	0.490086	3.37277	-0.218806	0.000749781	0.826801	0.0458623	0.999878
CCIN	3168409	ILMN_1660963	2480167	-0.000185048	0.0881377	-0.683886	0.326009	0.506693	0.270354	-1.34971	0.786899	0.17711	0.948832	0.999878
CCKAR	2764478	ILMN_1656330	6960040	-9.5e-05	-0.458598	0.424803	0.625341	0.504819	-0.733356	0.841494	0.463375	0.400071	0.835503	0.999878
CCKBR	3318639	ILMN_1760088	2070201	-0.000202114	-0.0211188	-0.677988	0.777366	0.511249	-0.0271671	-1.32614	0.978328	0.184793	0.9974	0.999878
CCL1	3753220	ILMN_2086965	1030204	-0.000150968	0.19084	0.23225	0.582801	0.458901	0.327454	0.506101	0.743339	0.612785	0.939446	0.999878
CCL11	3718185	ILMN_1725519	870603	-2.93e-05	-0.459354	0.543975	0.572215	0.42936	-0.802765	1.26694	0.422149	0.205175	0.814424	0.999878
CCL13	3718204	ILMN_1783593	1230605	-6.1e-05	0.299721	-0.418315	0.425056	0.554647	0.705132	-0.754201	0.480761	0.450728	0.841175	0.999878
CCL16	3753956	ILMN_2045324	2680600	0.000136158	-0.68519	-0.620308	0.564098	0.499882	-1.21466	-1.24091	0.224551	0.214639	0.673263	0.999878
CCL17	3662710	ILMN_1710186	6290088	0.000153817	-0.705775	-0.10551	0.602721	0.572052	-1.17098	-0.184442	0.241662	0.853667	0.691108	0.999878
CCL18	3718902	ILMN_1654411	5340348	0.000212005	-0.653225	-0.412841	0.413648	0.472659	-1.57918	-0.873444	0.114357	0.382421	0.528375	0.999878
CCL19	3204285	ILMN_1769129	7100646	-7.42e-05	0.349989	-0.24413	0.466821	0.574492	0.749729	-0.424949	0.453453	0.670874	0.832289	0.999878
CCL2	7385547	ILMN_1720048	1030333	-0.000114746	-0.261576	-0.628363	0.494485	0.463924	-0.528987	-1.35445	0.596838	0.175592	0.892431	0.999878
CCL20	2530713	ILMN_1657234	4220246	0.000446903	0.717701	-0.691725	0.385955	0.525682	1.85955	-1.31586	0.0630081	0.18822	0.421203	0.999878
CCL21	3204301	ILMN_1677505	1340626	-0.000202692	-0.285219	0.242405	0.618593	0.517565	-0.461077	0.468355	0.644763	0.63953	0.911399	0.999878
CCL22	3662687	ILMN_2160476	2480092	-0.000125316	-0.718598	0.121479	0.801609	0.56316	-0.896444	0.215709	0.370058	0.829215	0.780399	0.999878
CCL23	3753985	ILMN_1686109	6110343	-8.59e-05	0.259637	-0.304345	0.446513	0.237327	0.581476	-1.28238	0.560946	0.199708	0.877127	0.999878
CCL24	3057514	ILMN_1653766	780356	-0.000125309	-0.196329	-0.0167231	0.401611	0.503697	-0.488855	-0.0332008	0.624966	0.973514	0.904012	0.999878
CCL26	3057505	ILMN_1659601	4280301	2.87e-05	0.585914	0.255339	0.531633	0.462043	1.1021	0.552631	0.270469	0.580516	0.709283	0.999878
CCL27	3204261	ILMN_2113606	6280692	0.00102901	-1.16319	-0.465049	0.440387	0.499812	-2.64128	-0.930449	0.00828481	0.352138	0.164498	0.999878
CCL28	2855542	ILMN_1774087	4640050	0.000247384	0.831042	-1.11913	0.520702	0.491917	1.596	-2.27503	0.110551	0.0229041	0.522516	0.999878
CCL5	3753860	ILMN_1773352	620717	0.00104507	0.714061	0.117387	0.324929	0.0790632	2.19759	1.48472	0.0280238	0.137618	0.299808	0.999878
CCL7	3718177	ILMN_1683456	4610364	0.000473435	0.714071	0.0353785	0.459543	0.553083	1.55387	0.063966	0.120278	0.948997	0.537384	0.999878
CCL8	3718191	ILMN_1772964	6620121	-2.45e-05	-0.397495	0.272959	0.379949	0.388356	-1.04618	0.702857	0.295528	0.482145	0.728393	0.999878
CCM2L	3881630	ILMN_1748206	2900239	7.24e-05	-1.27672	-0.219102	1.10627	0.592789	-1.15407	-0.369612	0.248524	0.711672	0.695181	0.999878
CCNA1	3485674	ILMN_2157099	7400279	0.000780695	-1.26798	-0.00930399	0.658467	0.596878	-1.92566	-0.0155877	0.0542034	0.987563	0.398781	0.999878
CCNA2	2784113	ILMN_1786125	2650608	-0.000205098	0.222845	-0.310017	0.58274	0.447299	0.382408	-0.693086	0.702175	0.488255	0.928286	0.999878
CCNB1	2813414	ILMN_1712803	4590040	0.000106274	0.679658	0.086878	0.53104	0.448275	1.27986	0.193805	0.200652	0.846329	0.650818	0.999878
CCNB2	3595979	ILMN_1801939	5360070	0.000401814	0.687686	-0.442361	0.4323	0.368717	1.59076	-1.19973	0.111726	0.230244	0.5237	0.999878
CCNB3	3977347	ILMN_2380660	3310379	-9e-05	-0.401971	0.0881911	0.591229	0.480074	-0.67989	0.183703	0.496605	0.854246	0.849215	0.999878
CCNC	2966371	ILMN_1676423	4230653	0.000679301	-0.955903	0.0362224	0.534835	0.309537	-1.78728	0.117021	0.0739517	0.906843	0.447348	0.999878
CCND1	3338192	ILMN_1688480	5820601	-0.000191903	0.260605	0.189018	0.818128	0.5019	0.318538	0.376606	0.75009	0.706467	0.940913	0.999878
CCND2	3401704	ILMN_2067656	3460520	0.00185098	1.96717	0.0566273	0.570839	0.174794	3.4461	0.323965	0.000573396	0.745965	0.041302	0.999878
CCNE1	3828112	ILMN_1733419	6590093	9.06e-05	-0.824377	0.45909	0.658817	0.350991	-1.2513	1.30798	0.210883	0.19088	0.660319	0.999878
CCNE2	3145107	ILMN_2412384	4760154	-0.000200828	-0.0490936	0.518012	0.594045	0.519726	-0.0826428	0.996702	0.934139	0.318909	0.988061	0.999878
CCNF	3644764	ILMN_1773119	3130541	-0.000192849	-0.190104	0.00212212	0.979118	0.419145	-0.194159	0.00506297	0.846059	0.99596	0.966199	0.999878
CCNG1	2838598	ILMN_1694491	3170110	-0.000184867	-0.301393	-0.15233	0.654318	0.31178	-0.460622	-0.488582	0.64509	0.625137	0.911399	0.999878
CCNG2	2732391	ILMN_1879480	4480537	0.00217223	-2.25691	-0.0927652	0.683528	0.440699	-3.30185	-0.210495	0.000967179	0.833281	0.0527353	0.999878
CCNI	2774365	ILMN_1691942	5810605	0.00195843	1.57326	0.154757	0.501294	0.162529	3.1384	0.952181	0.00170854	0.341005	0.069548	0.999878
CCNJ	3259400	ILMN_2206812	6110433	-0.000203956	0.0342881	0.446191	0.686093	0.403853	0.0499759	1.10484	0.960144	0.269231	0.992947	0.999878
CCNK	3551303	ILMN_1689123	1010053	0.000473194	1.15552	-0.00969385	0.544411	0.31229	2.12251	-0.0310412	0.0338434	0.975237	0.321113	0.999878
CCNL1	2702307	ILMN_2094776	450554	0.00207771	-2.69319	-0.239387	0.79316	0.263802	-3.39552	-0.907449	0.000690283	0.36417	0.0443404	0.999878
CCNL2	2391532	ILMN_2379226	2340047	0.000870187	-0.738425	-0.407519	0.323984	0.406841	-2.2792	-1.00167	0.0226966	0.316505	0.268922	0.999878
CCNO	2857112	ILMN_1723794	4810392	-2.21e-05	0.666259	-0.818775	0.676568	0.503732	0.984762	-1.62542	0.324788	0.104074	0.750038	0.999878
CCNT1	3453218	ILMN_1817255	1340669	-0.000214936	0.269495	0.234992	0.628264	0.368764	0.428952	0.637243	0.667977	0.523967	0.918252	0.999878
CCNT2	2507209	ILMN_1787877	4120390	-0.000150673	-0.567759	0.453424	0.761434	0.246385	-0.745645	1.84031	0.455917	0.0657231	0.832714	0.999878
CCNY	3242425	ILMN_1758606	4480482	0.000660945	-1.73815	-0.593145	0.693325	0.583553	-2.50697	-1.01644	0.0122083	0.309421	0.199066	0.999878
CCP110	3651018	ILMN_1773200	5260082	-0.000150504	-0.590886	-0.447061	0.551551	0.314999	-1.07132	-1.41925	0.284079	0.155827	0.720056	0.999878
CCR10	3758062	ILMN_1666493	1440176	-0.000175129	0.0851226	-0.246768	0.241129	0.485934	0.353017	-0.507822	0.72409	0.611578	0.935004	0.999878
CCR6	2936657	ILMN_1759635	5890398	-8.33e-05	-0.129987	-0.307815	0.382205	0.557932	-0.340097	-0.551708	0.733797	0.581149	0.938309	0.999878
CCR7	3756319	ILMN_1715131	5390246	-0.000163637	0.102624	-0.0632015	0.3585	0.0881539	0.286258	-0.716945	0.774692	0.473408	0.946917	0.999878
CCRN4L	2744501	ILMN_1689378	460484	0.000860493	1.51191	0.122023	0.662331	0.501033	2.28272	0.243543	0.0224886	0.807585	0.267247	0.999878
CCS	3336351	ILMN_1766797	2600286	-0.000212511	-0.251586	0.452032	0.567513	0.328462	-0.443313	1.37621	0.657558	0.168757	0.915182	0.999878
CCSAP	2459793	ILMN_1699217	4830128	-0.00022633	-0.108624	-0.169466	0.723649	0.465174	-0.150106	-0.364307	0.880687	0.715629	0.973961	0.999878
CCSER2	3255402	ILMN_2129388	4920327	0.000683129	1.28534	-0.207241	0.628857	0.285226	2.04394	-0.726585	0.0410116	0.46748	0.3468	0.999878
CCT2	3421630	ILMN_1679382	7100288	0.000118678	-0.664816	-0.142647	0.630082	0.281026	-1.05513	-0.507595	0.291418	0.611737	0.725158	0.999878
CCT3	2438125	ILMN_1651828	5270717	0.000488683	1.17052	0.0751499	0.704207	0.327355	1.66218	0.229567	0.0965384	0.818428	0.49271	0.999878
CCT4	2555630	ILMN_1776073	6290014	-0.000115252	0.523002	0.1842	0.701649	0.47749	0.745389	0.385767	0.456071	0.699669	0.832714	0.999878
CCT5	2801526	ILMN_1706246	540170	-0.000176733	-0.164999	-0.00838565	0.578083	0.436934	-0.285424	-0.019192	0.775331	0.984688	0.946917	0.999878
CCT6A	3003193	ILMN_1722502	5820392	-0.000201128	0.0291623	-0.158897	0.564656	0.404922	0.0516461	-0.392413	0.958813	0.694753	0.992947	0.999878
CCT6B	3753288	ILMN_1699610	1230612	4.88e-05	-0.910566	-0.121945	0.537615	0.451679	-1.69371	-0.269982	0.0903817	0.787174	0.481476	0.999878
CCT7	2488732	ILMN_1662954	7160719	5.92e-05	0.65652	-0.306419	0.658835	0.286443	0.996487	-1.06974	0.319062	0.284738	0.745765	0.999878
CCT8	3928070	ILMN_1717868	3520156	0.000153455	-0.641209	-0.127385	0.580332	0.215321	-1.1049	-0.591605	0.269256	0.554115	0.708675	0.999878
CCT8L2	3951493	ILMN_1727272	4150523	-2.73e-05	-0.356145	-0.122033	0.39762	0.438551	-0.89569	-0.278265	0.370461	0.780809	0.780739	0.999878
CD101	2353749	ILMN_1799278	1400369	0.000423621	-0.729662	0.270074	0.478685	0.552009	-1.52431	0.489257	0.127495	0.62466	0.548166	0.999878
CD109	2913694	ILMN_1680364	4230292	-0.000166097	0.501742	-0.0822268	1.02319	0.583895	0.490369	-0.140825	0.623894	0.888008	0.903787	0.999878
CD151	3316344	ILMN_1794740	6550259	2.57e-05	-0.66748	0.21458	0.62427	0.378949	-1.06922	0.566251	0.285024	0.571223	0.720481	0.999878
CD160	2432714	ILMN_1742001	2190019	0.000169904	0.440313	0.217319	0.357125	0.147375	1.23294	1.4746	0.217657	0.14032	0.665158	0.999878
CD163	3442706	ILMN_2379599	2680092	-0.000162617	-0.115479	0.0427865	0.405707	0.229279	-0.284637	0.186613	0.775934	0.851964	0.946917	0.999878
CD163L1	3442641	ILMN_1802780	240220	0.000574813	-1.88183	0.57754	0.901344	0.584249	-2.0878	0.988517	0.0368656	0.3229	0.333973	0.999878
CD164L2	2403099	ILMN_1714118	1740180	-0.000201276	-0.237359	0.327342	0.723344	0.409215	-0.328142	0.799926	0.742818	0.423754	0.93944	0.999878
CD177	3835035	ILMN_1774071	1300465	-2.23e-05	-0.369841	-0.175113	0.532321	0.510699	-0.694771	-0.342888	0.487231	0.731683	0.84311	0.999878
CD180	2860178	ILMN_1665647	4120068	0.00296471	-1.07698	-0.0217528	0.320959	0.410477	-3.35551	-0.0529939	0.00079806	0.957737	0.0473726	0.999878
CD19	3655109	ILMN_1782704	7210136	2.38e-05	-0.663183	-0.00824306	0.777863	0.138347	-0.852571	-0.0595826	0.393938	0.952488	0.797749	0.999878
CD1A	2362180	ILMN_1723520	870156	-0.000128748	-0.284848	-0.127795	0.494347	0.416544	-0.576211	-0.306799	0.564498	0.758996	0.878129	0.999878
CD1B	2439286	ILMN_1726230	6270202	-0.000204457	0.0796229	0.258049	0.345633	0.370575	0.230368	0.696346	0.817815	0.486212	0.959429	0.999878
CD1C	2362201	ILMN_1654210	1500725	0.00168892	-1.17396	-0.17996	0.345761	0.475634	-3.39529	-0.378359	0.000690856	0.705164	0.0443404	0.999878
CD1D	2362157	ILMN_1719433	6400358	-0.00019362	0.484284	0.118919	0.554624	0.242242	0.873175	0.490909	0.38261	0.623491	0.789739	0.999878
CD2	2353669	ILMN_1695025	4210619	0.00023269	0.590869	0.0383739	0.397536	0.150539	1.48633	0.254911	0.137255	0.798792	0.559913	0.999878
CD200	2636125	ILMN_1706722	4220703	8.75e-05	-0.344909	0.460419	0.326137	0.50077	-1.05756	0.919422	0.290307	0.357875	0.723933	0.999878
CD200R1	2688955	ILMN_2408112	4280523	0.000225186	-0.706332	-0.544471	0.443012	0.452421	-1.59439	-1.20346	0.110912	0.228798	0.522516	0.999878
CD200R1L	2688933	ILMN_1657358	3780431	0.000155723	-0.655291	-0.246749	0.458896	0.466679	-1.42797	-0.528735	0.153362	0.596989	0.587044	0.999878
CD207	2558876	ILMN_1718754	3830678	-0.000117717	-0.448905	-0.0379573	0.701098	0.424404	-0.640288	-0.0894367	0.522014	0.928735	0.862581	0.999878
CD209	3848540	ILMN_1676372	2640037	0.000419407	-0.996383	0.336845	0.534953	0.567878	-1.86256	0.593164	0.062582	0.553072	0.420202	0.999878
CD22	3830359	ILMN_1792075	1010754	-1.65e-05	-0.249151	-0.145165	0.297678	0.391393	-0.836982	-0.370893	0.402642	0.710717	0.80256	0.999878
CD226	3812385	ILMN_1687825	3940754	0.00161292	1.19736	-0.363481	0.447338	0.35648	2.67664	-1.01964	0.00746044	0.307899	0.157039	0.999878
CD24	4035833	ILMN_1805519	5090347	0.000388717	0.456973	0.149997	0.283774	0.441502	1.61034	0.339742	0.107386	0.734051	0.517807	0.999878
CD244	2440385	ILMN_1702534	5860224	0.000133246	0.674547	0.368385	0.54387	0.378382	1.24027	0.973581	0.214933	0.330265	0.66349	0.999878
CD247	2442587	ILMN_2377669	3890689	0.00244285	1.80055	0.186201	0.531641	0.12086	3.38677	1.54063	0.000712617	0.123407	0.0449583	0.999878
CD248	3378183	ILMN_1726589	2490113	0.000514671	-0.60985	0.578139	0.417568	0.356834	-1.46048	1.62019	0.144221	0.105191	0.570726	0.999878
CD27	3402506	ILMN_1688959	1240450	-8.68e-05	0.539996	-0.171621	0.535012	0.187534	1.00932	-0.915146	0.312871	0.360115	0.74127	0.999878
CD274	3161082	ILMN_1701914	4900239	-5.59e-05	-0.182829	-0.235273	0.198449	0.546583	-0.921289	-0.430444	0.356943	0.666872	0.769853	0.999878
CD276	3601229	ILMN_2365307	5900575	0.000606848	1.59122	0.26107	0.855901	0.484645	1.85912	0.538684	0.0630686	0.590105	0.421203	0.999878
CD28	2523801	ILMN_1822333	7160369	-0.000198671	0.00296231	-0.72531	0.406492	0.355408	0.0072875	-2.04078	0.994186	0.0412724	0.998436	0.999878
CD2AP	2909404	ILMN_1730433	3140646	0.00198904	1.29061	-0.177566	0.409327	0.395163	3.153	-0.449349	0.00162549	0.65318	0.0676541	0.999878
CD2BP2	3687698	ILMN_1796244	2490066	0.000215583	-0.479182	-0.163233	0.461061	0.257733	-1.0393	-0.633341	0.298713	0.526511	0.729249	0.999878
CD300A	3734379	ILMN_1693552	4780196	9.86e-06	0.330134	-0.140254	0.50053	0.194496	0.659568	-0.721119	0.509561	0.470836	0.857424	0.999878
CD300C	3770305	ILMN_1701906	3120091	-0.000207688	-0.154109	-0.346216	0.755137	0.234724	-0.204081	-1.47499	0.838299	0.140215	0.964766	0.999878
CD300E	3770345	ILMN_1751095	2640674	0.000496223	-1.13543	-0.686736	0.54318	0.560682	-2.09034	-1.22482	0.0366371	0.220642	0.33319	0.999878
CD300LB	3770290	ILMN_1782741	4610110	0.000676386	-0.891211	-0.300748	0.456255	0.300096	-1.95332	-1.00217	0.0508371	0.31626	0.386247	0.999878
CD300LF	3770361	ILMN_2112357	4540228	2.08e-05	-0.708344	-0.150097	0.6994	0.207874	-1.01279	-0.722058	0.31121	0.470259	0.739636	0.999878
CD300LG	3722656	ILMN_2174805	4040341	0.000292757	1.14955	-0.222196	0.956283	0.521179	1.2021	-0.426332	0.22938	0.669866	0.677984	0.999878
CD320	3848871	ILMN_2115633	2340327	0.00016598	1.03351	0.158339	0.82485	0.263699	1.25296	0.600453	0.210278	0.548204	0.660155	0.999878
CD34	2453307	ILMN_2341229	4040706	-0.000113467	0.615114	0.0384993	0.839471	0.466978	0.732739	0.0824435	0.463751	0.934294	0.835503	0.999878
CD38	2719656	ILMN_2233783	2760500	0.00132519	1.54753	0.0496095	0.51523	0.27108	3.00358	0.183007	0.00268136	0.854792	0.0910938	0.999878
CD3D	3393744	ILMN_2261416	1170671	-0.000144948	0.156322	-0.0556989	0.395961	0.123722	0.394792	-0.450194	0.693013	0.652571	0.925605	0.999878
CD3E	3351280	ILMN_1739794	1780600	0.000183334	0.473235	-0.166593	0.397053	0.186651	1.19187	-0.892541	0.233369	0.372103	0.682638	0.999878
CD3EAP	3836243	ILMN_1747870	5220400	-0.000209722	0.0873931	-0.149447	0.970116	0.538408	0.0900853	-0.277572	0.928223	0.781341	0.986364	0.999878
CD3G	3351300	ILMN_1717197	1090474	8.17e-05	0.404368	0.222377	0.366408	0.202737	1.1036	1.09687	0.269819	0.272696	0.708716	0.999878
CD40	3887302	ILMN_2367818	3370138	-0.000127473	-0.295498	-0.733968	0.618334	0.401448	-0.477895	-1.8283	0.632746	0.0675043	0.90719	0.999878
CD40LG	3992575	ILMN_1659077	50706	-0.000163239	0.102512	-0.623233	0.413753	0.288679	0.247762	-2.15891	0.804329	0.0308569	0.953859	0.999878
CD46	2377427	ILMN_2307740	2120451	0.000120639	-0.920142	0.00717485	0.708106	0.126941	-1.29944	0.0565214	0.193852	0.954926	0.642973	0.999878
CD47	2687739	ILMN_2356991	6270286	0.000271819	-1.11804	0.119293	0.793317	0.245899	-1.40932	0.485131	0.158803	0.627583	0.5965	0.999878
CD48	2440354	ILMN_2061043	2030767	0.00125441	-1.64606	-0.194379	0.630589	0.135654	-2.61035	-1.43291	0.0090718	0.151885	0.174482	0.999878
CD5	3332729	ILMN_1753112	5050347	0.000302417	0.896115	-0.214535	0.592373	0.252075	1.51275	-0.851078	0.130405	0.394726	0.551158	0.999878
CD52	2326463	ILMN_2208903	20129	-6.14e-05	-0.317179	0.0108063	0.494624	0.0779199	-0.641252	0.138684	0.521388	0.8897	0.862424	0.999878
CD53	2351572	ILMN_2413808	460102	0.00114332	2.08569	-0.124782	0.813086	0.22978	2.56515	-0.543052	0.0103418	0.587094	0.183937	0.999878
CD59	3368707	ILMN_2333687	1430240	-0.000138453	0.439856	0.16545	0.480686	0.417423	0.915059	0.396361	0.360205	0.691839	0.772386	0.999878
CD6	3332663	ILMN_1746565	6590228	-1.91e-05	0.741706	-0.0874575	0.815898	0.156942	0.909067	-0.557259	0.363358	0.57735	0.774695	0.999878
CD63	3457160	ILMN_1753468	3520167	-7.57e-05	0.475427	0.025804	0.839077	0.276285	0.566608	0.0933963	0.571006	0.925589	0.880972	0.999878
CD68	3708858	ILMN_2267914	6220382	1.63e-05	0.549452	-0.0558373	0.715519	0.204822	0.767907	-0.272614	0.442579	0.78515	0.825809	0.999878
CD69	3443868	ILMN_2188333	2710575	0.0029404	1.26197	0.169496	0.343754	0.18026	3.67113	0.940285	0.00024398	0.347072	0.0244894	0.999878
CD7	3774883	ILMN_1792538	6330091	-9.99e-05	-0.769882	0.0637972	0.947401	0.138444	-0.812625	0.460816	0.416471	0.644931	0.810764	0.999878
CD70	3847989	ILMN_1760247	4220068	-0.000197266	0.269721	-0.109854	0.892323	0.478222	0.302269	-0.229713	0.76246	0.818315	0.944162	0.999878
CD72	3204648	ILMN_1723004	4200546	0.000379757	-0.560993	-0.316398	0.365416	0.270322	-1.53522	-1.17045	0.124793	0.241821	0.542836	0.999878
CD74	2881370	ILMN_1736567	1240070	0.000753079	-1.11073	-0.0471111	0.56208	0.111315	-1.97611	-0.423225	0.0481966	0.672131	0.378105	0.999878
CD79A	3834502	ILMN_2410371	6840471	0.00045583	-0.481742	-0.250768	0.294003	0.383256	-1.63856	-0.65431	0.101367	0.512912	0.502872	0.999878
CD79B	3766533	ILMN_1785439	4260725	-8.12e-05	-0.43924	-0.0273439	0.540514	0.145004	-0.812633	-0.188573	0.416467	0.850427	0.810764	0.999878
CD80	2690900	ILMN_1716736	5390239	-0.000128174	-0.379924	-0.395644	0.567704	0.400794	-0.669228	-0.98715	0.50338	0.323569	0.852506	0.999878
CD82	3328520	ILMN_1662973	5130136	0.00179782	-2.09811	0.306146	0.645982	0.323362	-3.24794	0.946759	0.00117006	0.343762	0.0577835	0.999878
CD83	2895841	ILMN_1780582	5050162	-0.00013624	-0.215829	-0.446149	0.597163	0.397594	-0.361423	-1.12212	0.717798	0.26181	0.932859	0.999878
CD84	2440295	ILMN_2049293	3440369	-0.000185588	0.220904	-0.0306039	0.523413	0.347399	0.422044	-0.0880942	0.673011	0.929802	0.920568	0.999878
CD86	2638789	ILMN_1672097	4570368	-0.00013933	0.62701	-0.218178	0.478124	0.553591	1.3114	-0.394115	0.189784	0.693496	0.638757	0.999878
CD8A	2562932	ILMN_1760374	2970408	-0.000209075	0.0835516	0.0950295	0.535523	0.131372	0.156019	0.723363	0.876025	0.469457	0.972981	0.999878
CD8B	2562965	ILMN_1748601	70386	-0.000165173	-0.115595	-0.064707	0.296105	0.271507	-0.390385	-0.238325	0.696269	0.811629	0.926437	0.999878
CD9	3402315	ILMN_1695423	6250487	-5.11e-05	-0.351433	-0.100072	0.380423	0.215362	-0.923796	-0.464671	0.355637	0.642167	0.769326	0.999878
CD93	3901055	ILMN_1704730	6100615	2.4e-05	-0.49399	-0.00805815	0.425703	0.13462	-1.16041	-0.0598585	0.245938	0.952268	0.693066	0.999878
CD96	2635741	ILMN_1711573	2710754	5e-05	0.613139	-0.112264	0.595944	0.24676	1.02885	-0.454954	0.303598	0.649142	0.731964	0.999878
CD97	3822657	ILMN_1673363	6960630	5.8e-06	0.787131	0.180357	0.627383	0.122203	1.25463	1.47588	0.209673	0.139977	0.659514	0.999878
CD99L2	4025771	ILMN_2388142	5420358	0.000473213	-1.20249	0.1084	0.715185	0.321827	-1.68137	0.336828	0.092754	0.736247	0.485823	0.999878
CDA	2324084	ILMN_1714592	5090372	0.000128898	0.491076	0.131434	0.416543	0.12787	1.17893	1.02787	0.238481	0.304012	0.687197	0.999878
CDADC1	3489350	ILMN_1763878	6270390	-5.33e-05	0.407242	-0.0671769	0.566491	0.47099	0.718885	-0.142629	0.472245	0.886583	0.837886	0.999878
CDAN1	3620741	ILMN_2401906	5910445	-8.41e-05	0.983306	-0.016113	1.31966	0.123172	0.745121	-0.130818	0.456233	0.89592	0.832714	0.999878
CDC123	3235461	ILMN_1678605	6100301	-0.000203056	0.0998905	-0.428926	0.62266	0.282006	0.160425	-1.52098	0.872552	0.128264	0.972192	0.999878
CDC14B	3216356	ILMN_1687074	540113	0.000285213	1.33137	-0.660673	0.7138	0.507275	1.86519	-1.3024	0.0622125	0.192781	0.420123	0.999878
CDC16	3503164	ILMN_1727389	4880521	-0.000165075	0.104832	-0.138622	0.523756	0.308349	0.200155	-0.449562	0.841367	0.653027	0.965555	0.999878
CDC20	2333136	ILMN_1663390	1500010	-5.78e-05	0.244825	-0.247893	0.220114	0.270584	1.11227	-0.916138	0.266077	0.359594	0.706494	0.999878
CDC20B	2857042	ILMN_1787292	7050184	-4.22e-06	-0.88653	0.852628	0.911248	0.519252	-0.972875	1.64203	0.330662	0.100584	0.754876	0.999878
CDC23	2877314	ILMN_1799688	1470750	-0.000196819	-0.0500127	-0.587106	0.690274	0.437276	-0.0724535	-1.34264	0.942244	0.179387	0.990322	0.999878
CDC25A	2673085	ILMN_1733396	4670670	-0.000164193	0.344872	0.050532	0.862624	0.464896	0.399794	0.108695	0.689325	0.913444	0.924255	0.999878
CDC25B	3874438	ILMN_2338323	4760338	-8.59e-05	0.41069	-0.0259923	0.777601	0.1691	0.52815	-0.15371	0.597419	0.877838	0.892499	0.999878
CDC25C	2877378	ILMN_2407619	4200451	0.00023712	0.563613	0.293461	0.379025	0.53651	1.48701	0.546982	0.137075	0.584391	0.559913	0.999878
CDC27	3760625	ILMN_1746533	6550537	0.000484288	0.695265	-0.0489716	0.455438	0.522996	1.52658	-0.0936368	0.126927	0.925398	0.547538	0.999878
CDC34	3814978	ILMN_1713006	1710278	0.00119842	0.724457	0.16217	0.294179	0.104879	2.46264	1.54626	0.0138249	0.122043	0.212759	0.999878
CDC37L1	3160735	ILMN_1764185	3130064	-9.2e-05	-0.361168	0.151793	0.640267	0.583006	-0.564091	0.260363	0.572718	0.794584	0.882174	0.999878
CDC40	2921086	ILMN_1737651	2810594	-0.000113067	-0.418665	-0.202511	0.773166	0.296525	-0.541495	-0.682946	0.588191	0.494641	0.887656	0.999878
CDC42	2324634	ILMN_2408139	580168	0.000423837	-0.829013	-0.110623	0.526953	0.573755	-1.57322	-0.192805	0.115731	0.847112	0.530845	0.999878
CDC42BPB	3580498	ILMN_1689989	4200703	-0.000180145	0.19925	-0.315958	0.985179	0.528082	0.202247	-0.598311	0.839732	0.549632	0.965071	0.999878
CDC42BPG	3377177	ILMN_1692342	940370	-0.000112373	1.08607	0.265959	1.386	0.483415	0.783605	0.550168	0.433309	0.582204	0.821812	0.999878
CDC42EP1	3944758	ILMN_1764927	6760750	-0.000199811	-0.208037	-0.105397	0.745263	0.449444	-0.279145	-0.234506	0.780145	0.814592	0.947939	0.999878
CDC42EP5	3870895	ILMN_1774982	3370730	-0.000162458	-0.19301	-0.0366925	0.82412	0.621282	-0.234201	-0.0590593	0.814839	0.952905	0.958424	0.999878
CDC42SE1	2434776	ILMN_1769027	4540288	-0.00019794	0.00692413	0.0957857	0.700402	0.204809	0.00988594	0.467682	0.992113	0.640012	0.998082	0.999878
CDC42SE2	2828146	ILMN_2313926	6770161	0.000548869	-1.07134	-0.330068	0.496833	0.177412	-2.15634	-1.86046	0.0311046	0.0628211	0.309249	0.999878
CDC45	3936913	ILMN_1670238	2320170	-0.000179577	0.470816	-0.469269	0.787674	0.485576	0.597729	-0.966418	0.550047	0.333835	0.873817	0.999878
CDC5L	2908572	ILMN_1652907	6760189	-0.000161263	-0.201925	-0.295016	0.624872	0.32417	-0.323147	-0.910065	0.746597	0.362788	0.939791	0.999878
CDC6	3720896	ILMN_1785914	510445	0.000628434	0.869596	-0.000111199	0.455667	0.570583	1.9084	-0.000194886	0.0563959	0.999845	0.403545	0.999927
CDC7	2346399	ILMN_1741801	4900044	7.31e-05	0.414595	-0.226076	0.483618	0.39189	0.857278	-0.576887	0.391332	0.564016	0.795471	0.999878
CDC73	2372967	ILMN_1701614	4120184	-4.85e-05	0.615675	-0.284623	0.804447	0.5785	0.76534	-0.492002	0.444105	0.622718	0.826566	0.999878
CDCA2	3090697	ILMN_1660654	2940398	-0.00022206	0.473246	0.274686	0.923549	0.59705	0.512421	0.460073	0.608379	0.645464	0.895627	0.999878
CDCA3	3442322	ILMN_1737728	6370474	-0.000150029	0.355907	-0.83853	0.624414	0.570099	0.569987	-1.47085	0.568712	0.141331	0.879958	0.999878
CDCA5	3377423	ILMN_1683450	130022	-0.000208769	0.0394138	-0.600755	0.722385	0.403419	0.0545606	-1.48916	0.956491	0.136445	0.99274	0.999878
CDCA7	2516023	ILMN_1762142	7400301	-0.000194423	0.128401	0.570484	0.640524	0.43725	0.200462	1.30471	0.841128	0.191992	0.965555	0.999878
CDCA7L	3040897	ILMN_2230683	3800753	0.00075148	-0.625379	-0.231922	0.356808	0.376848	-1.7527	-0.615426	0.079714	0.538273	0.459193	0.999878
CDCP1	2671728	ILMN_2341611	60215	-0.000215271	0.39179	-0.0980951	0.786474	0.499862	0.498161	-0.196244	0.618393	0.844419	0.90039	0.999878
CDH1	3666409	ILMN_1770940	1300113	0.000283382	0.698724	-0.115059	0.491338	0.612533	1.42209	-0.187842	0.155063	0.851001	0.589877	0.999878
CDH10	2851274	ILMN_1791270	2260424	0.000158652	-0.893166	0.162785	0.793561	0.447857	-1.12552	0.363475	0.260424	0.71625	0.703453	0.999878
CDH12	2850964	ILMN_1709269	5090204	-0.000205119	0.115076	-0.158701	0.805602	0.471131	0.142845	-0.336852	0.886418	0.736228	0.975465	0.999878
CDH13	3671202	ILMN_1766925	5820563	-0.000198395	-0.00808348	0.483693	0.786369	0.610151	-0.0102795	0.792744	0.991799	0.427927	0.998082	0.999878
CDH15	3673892	ILMN_1784036	5090195	0.00144858	2.64583	0.978499	0.969407	0.605274	2.72933	1.61662	0.00636839	0.10596	0.149008	0.999878
CDH16	3695315	ILMN_2095597	20762	0.000348519	1.97182	-0.163951	1.00787	0.489388	1.95642	-0.335011	0.0504707	0.737617	0.384992	0.999878
CDH17	3144859	ILMN_1814015	7050673	0.000268427	1.15114	-0.46128	0.865608	0.442427	1.32986	-1.04261	0.183623	0.297128	0.632369	0.999878
CDH18	2850676	ILMN_1733669	7330561	-0.000191146	0.601337	0.00669545	0.826065	0.49596	0.727954	0.0135	0.466675	0.989229	0.835669	0.999878
CDH2	3802602	ILMN_1779228	1170709	-0.000198082	0.00277753	-0.836652	0.594101	0.36418	0.00467518	-2.29736	0.99627	0.0215984	0.998741	0.999878
CDH20	3790982	ILMN_1775739	3370605	-0.000197595	0.0118243	-0.172454	0.784634	0.455652	0.0150698	-0.378476	0.987977	0.705077	0.997984	0.999878
CDH22	3907711	ILMN_1753586	3520626	-0.000130166	-1.03825	-0.371933	1.23836	0.53863	-0.838413	-0.690517	0.401839	0.489869	0.802331	0.999878
CDH24	3557069	ILMN_1660321	6560326	-4.95e-05	-1.3469	-0.271401	1.12006	0.418691	-1.20253	-0.648212	0.229216	0.516848	0.677984	0.999878
CDH3	3666366	ILMN_1704294	7610338	-0.000152821	-0.684655	-0.388852	1.11043	0.585489	-0.616567	-0.664149	0.537548	0.506595	0.869229	0.999878
CDH5	3664664	ILMN_1719236	4730482	-0.000216091	-0.1451	-0.523867	0.96472	0.597292	-0.150406	-0.877069	0.88045	0.380449	0.97392	0.999878
CDH6	2805078	ILMN_2190624	520593	-7.86e-06	-0.888645	0.334591	0.895896	0.412642	-0.991906	0.810849	0.321291	0.417452	0.746731	0.999878
CDH8	3694215	ILMN_1757020	940193	-1.39e-05	0.529119	-0.0111814	0.701717	0.450013	0.754035	-0.0248467	0.450864	0.980177	0.830594	0.999878
CDH9	2851511	ILMN_1675454	2340274	-0.000211661	0.208773	0.394721	0.778174	0.390469	0.268285	1.01089	0.788491	0.312069	0.94898	0.999878
CDHR2	2842624	ILMN_1718173	4590692	-0.00019606	-0.0219966	0.198468	1.34021	0.562543	-0.0164128	0.352805	0.986906	0.724235	0.997902	0.999878
CDHR4	2674748	ILMN_1678714	5260482	0.000669493	1.51878	-0.0432735	0.710997	0.488298	2.13612	-0.0886211	0.0327175	0.929383	0.316357	0.999878
CDIP1	3678186	ILMN_1815812	130709	-0.0001988	-0.147974	-0.0821175	0.799424	0.487599	-0.185101	-0.168412	0.853157	0.866259	0.967855	0.999878
CDIPT	3687260	ILMN_1770425	990161	0.000160524	-0.773983	0.443584	0.625898	0.305522	-1.2366	1.45189	0.216294	0.146532	0.664095	0.999878
CDK11B	2391744	ILMN_1765704	4250739	-0.000117557	0.161958	0.302772	0.27191	0.303258	0.595632	0.998398	0.551448	0.318087	0.874007	0.999878
CDK12	3720228	ILMN_1707448	5860048	0.00195222	1.82173	-0.161747	0.517011	0.289305	3.52358	-0.559087	0.000429545	0.576102	0.0361959	0.999878
CDK14	3012064	ILMN_2171295	6400553	-0.000132116	-0.183589	-0.0927824	0.394196	0.414208	-0.46573	-0.223999	0.641429	0.822758	0.910991	0.999878
CDK17	3466826	ILMN_1780824	630524	-0.000175385	-0.335804	-0.356846	0.74613	0.408117	-0.450061	-0.874372	0.652686	0.381916	0.912386	0.999878
CDK19	2969467	ILMN_1676891	3930452	-0.000187076	-0.0836806	0.223014	0.705074	0.259439	-0.118683	0.859602	0.905531	0.390009	0.980219	0.999878
CDK2	3417146	ILMN_1665559	4590064	-0.000195332	-0.163724	-0.336053	0.586548	0.383053	-0.279131	-0.8773	0.780156	0.380323	0.947939	0.999878
CDK20	3213530	ILMN_2357730	1820739	-7.13e-05	0.786866	-0.201345	0.910334	0.506729	0.864372	-0.397342	0.387425	0.691115	0.793014	0.999878
CDK2AP2	3378934	ILMN_1690653	2100411	-0.000197069	0.0394449	0.155073	0.819478	0.300046	0.0481342	0.516832	0.961611	0.605274	0.993051	0.999878
CDK3	3735364	ILMN_1767414	6280754	2.83e-05	0.473877	0.0588252	0.595441	0.50547	0.795841	0.116377	0.426162	0.907354	0.817057	0.999878
CDK4	3458783	ILMN_1689001	7380110	-0.000193411	0.041378	-0.0635132	0.600451	0.370745	0.0689115	-0.171312	0.945063	0.863978	0.990811	0.999878
CDK5	3079313	ILMN_1781987	3170674	-0.00018525	-0.147994	-0.0996704	0.466369	0.355783	-0.317333	-0.280144	0.751004	0.779367	0.941107	0.999878
CDK5R2	2528198	ILMN_1717803	3420367	-0.000186353	0.52892	0.32568	0.876607	0.4807	0.603372	0.677512	0.546289	0.498081	0.872238	0.999878
CDK5RAP3	3724989	ILMN_1658579	4230228	-0.000133042	-0.311905	0.261025	0.399153	0.545635	-0.781418	0.478387	0.434593	0.632375	0.822056	0.999878
CDK6	3061319	ILMN_1802615	670286	0.000134041	0.795738	-0.251841	0.658313	0.318511	1.20875	-0.790681	0.226814	0.42913	0.675843	0.999878
CDK7	2813481	ILMN_1778917	4760369	0.00139761	-1.12964	0.0716791	0.44037	0.393093	-2.5652	0.182346	0.0103402	0.855311	0.183937	0.999878
CDK8	3482498	ILMN_1777913	4280520	0.002113	1.36297	-0.120115	0.44885	0.587524	3.03657	-0.204443	0.00240507	0.838007	0.0865108	0.999878
CDK9	3190035	ILMN_1747556	430767	-0.000156518	0.37308	0.373779	0.791379	0.370788	0.47143	1.00807	0.637354	0.313423	0.909396	0.999878
CDKAL1	2897635	ILMN_1788022	2230020	-0.00013761	0.297728	-0.140256	0.714245	0.482916	0.416843	-0.290436	0.676811	0.771483	0.921045	0.999878
CDKL1	3563861	ILMN_1724183	6900315	0.000607765	1.64612	0.369322	0.754771	0.483213	2.18095	0.764306	0.029233	0.444685	0.30217	0.999878
CDKL2	2773719	ILMN_1856533	2630280	-0.000173493	0.37435	0.170041	0.709307	0.471648	0.527768	0.360525	0.597683	0.718455	0.892673	0.999878
CDKN1A	2905169	ILMN_1784602	4230201	-0.000111041	-0.347108	0.144435	0.607786	0.153344	-0.571102	0.941901	0.567956	0.346243	0.879895	0.999878
CDKN1B	3405440	ILMN_2196347	1030348	-0.000166567	0.147973	-0.564658	0.541575	0.176476	0.273226	-3.19962	0.78469	0.00137607	0.948562	0.999878
CDKN1C	3359432	ILMN_1718565	5890653	-0.000131131	-0.269698	0.164068	0.710349	0.20209	-0.379669	0.811853	0.704207	0.416876	0.928286	0.999878
CDKN2A	3201437	ILMN_1744295	5550671	-0.000138602	-0.31524	-0.337061	0.824152	0.533865	-0.382503	-0.631361	0.702105	0.527805	0.928286	0.999878
CDKN2AIP	2753880	ILMN_1773066	5090440	-1.86e-06	-0.686513	-0.177807	0.655558	0.389368	-1.04722	-0.456654	0.295048	0.64792	0.727806	0.999878
CDKN2AIPNL	2876213	ILMN_1806405	1430167	5.67e-05	-0.38819	1.1408	0.424248	0.519513	-0.915006	2.19591	0.360232	0.0280984	0.772386	0.999878
CDKN2C	2335922	ILMN_2359332	6450095	7.31e-05	0.744954	-0.0588523	0.654877	0.414182	1.13755	-0.142093	0.255363	0.887007	0.698802	0.999878
CDKN2D	3850445	ILMN_1740597	1090333	-8.99e-05	-0.456616	-0.137514	0.591274	0.407411	-0.772258	-0.33753	0.439998	0.735717	0.825108	0.999878
CDO1	2871896	ILMN_2234187	4640491	0.000211628	0.869251	0.0933693	0.585104	0.469652	1.48564	0.198805	0.137438	0.842415	0.559913	0.999878
CDPF1	3963973	ILMN_1787288	460347	-0.000160011	0.262055	-0.456959	0.722856	0.509661	0.362527	-0.896594	0.716973	0.369936	0.932844	0.999878
CDR1	4024373	ILMN_1655690	1030343	0.000358777	-0.727495	-0.110924	0.444742	0.619489	-1.63577	-0.179058	0.10195	0.857893	0.504922	0.999878
CDR2	3684782	ILMN_1720270	2140228	-0.0001461	0.229987	-0.661909	0.496043	0.308727	0.463642	-2.144	0.642924	0.0320332	0.911399	0.999878
CDR2L	3734560	ILMN_2128770	3940482	5.3e-05	0.621656	-0.340602	0.714402	0.533779	0.870177	-0.638096	0.384245	0.523411	0.790942	0.999878
CDS1	2734270	ILMN_1801476	5860010	-0.000187235	0.272489	-0.165906	0.937724	0.531882	0.290585	-0.311923	0.77138	0.755099	0.945877	0.999878
CDS2	3874900	ILMN_1790973	510673	0.0017698	-1.87407	-0.258855	0.587083	0.275875	-3.19217	-0.938306	0.00142076	0.348087	0.0643613	0.999878
CDT1	3673684	ILMN_1651237	2630433	-0.000155025	-0.358736	-0.275124	1.05051	0.498535	-0.341486	-0.551866	0.732752	0.58104	0.937729	0.999878
CDV3	2643157	ILMN_1691106	6660575	-0.00019496	0.109956	-0.214391	0.737033	0.319723	0.149187	-0.670552	0.881412	0.502506	0.974405	0.999878
CDX1	2835368	ILMN_1815619	70184	-0.000134524	0.305147	0.253047	0.66919	0.464476	0.455994	0.544801	0.648414	0.58589	0.91211	0.999878
CDX2	3507134	ILMN_1671058	2030397	-0.000163953	-0.189985	-0.503855	0.867315	0.541459	-0.219049	-0.93055	0.826621	0.352086	0.962115	0.999878
CDX4	3981592	ILMN_1722603	1770286	-0.000100452	0.261214	0.669161	0.445106	0.544526	0.586857	1.22889	0.557326	0.219114	0.876013	0.999878
CDYL	2892979	ILMN_1721415	6450202	-1.92e-05	0.531094	-0.578707	0.749861	0.643504	0.708256	-0.899305	0.478819	0.36849	0.840448	0.999878
CDYL2	3701297	ILMN_1777479	4830487	-0.00018474	-0.164591	0.336015	0.672129	0.450004	-0.24488	0.746693	0.806559	0.455249	0.954824	0.999878
CEACAM19	3835675	ILMN_1752335	3190400	1.68e-06	0.473583	0.21501	0.813898	0.532548	0.58187	0.403738	0.56068	0.686406	0.877127	0.999878
CEACAM20	3864944	ILMN_1774781	4220593	-0.000199833	-0.0158301	-0.0257167	0.787682	0.546678	-0.020097	-0.0470417	0.983967	0.96248	0.997785	0.999878
CEACAM3	3834405	ILMN_1743570	1850139	4.23e-05	-0.863441	-0.338393	0.57555	0.234837	-1.5002	-1.44097	0.133624	0.149593	0.556961	0.999878
CEACAM4	3863189	ILMN_1657455	6370646	-0.000117586	0.376047	0.310352	0.303869	0.344656	1.23753	0.900469	0.215949	0.367871	0.663505	0.999878
CEACAM5	3834341	ILMN_1670959	2360632	0.00123556	-1.54997	0.271158	0.637868	0.477868	-2.42993	0.567433	0.0151365	0.57042	0.218699	0.999878
CEACAM6	3834379	ILMN_1712522	7400377	-8.56e-05	-0.229688	0.132445	0.348444	0.146857	-0.659183	0.901868	0.509808	0.367127	0.8575	0.999878
CEACAM7	3863214	ILMN_1813957	3400564	-4.7e-05	0.325138	-0.56791	0.47605	0.556339	0.682991	-1.0208	0.494644	0.30735	0.848411	0.999878
CEACAM8	3863723	ILMN_1806056	4780075	0.00138001	0.615511	0.0338549	0.212519	0.103905	2.89626	0.325824	0.00379262	0.744557	0.109333	0.999878
CEBPA	3858993	ILMN_1715715	1430280	-8.56e-05	0.378194	-0.215962	0.623124	0.220889	0.606933	-0.977692	0.543923	0.328227	0.871083	0.999878
CEBPA-AS1	3829300	ILMN_1697115	3930082	-0.00012621	0.126488	0.0305333	0.203515	0.467816	0.621518	0.0652677	0.534287	0.947961	0.868312	0.999878
CEBPB	3888613	ILMN_1693014	20446	-0.000146277	-0.347723	0.232255	0.735047	0.143552	-0.473063	1.61791	0.636189	0.105681	0.908733	0.999878
CEBPD	3134013	ILMN_1782050	5490408	0.000599188	-1.28858	0.269588	0.575475	0.151758	-2.23916	1.77644	0.0251887	0.0756605	0.284731	0.999878
CEBPE	3557198	ILMN_1779095	2940767	-0.000157616	0.243409	-0.204529	0.467739	0.271331	0.520395	-0.753798	0.602811	0.45097	0.893755	0.999878
CEBPZ	2548459	ILMN_1744147	4760373	-0.000134408	-0.288811	0.0528204	0.421148	0.238673	-0.685771	0.221308	0.492889	0.824852	0.847076	0.999878
CECR2	3936167	ILMN_1671171	3460750	-0.000202408	-0.039619	0.327037	1.07754	0.460024	-0.0367679	0.710913	0.970672	0.477138	0.995497	0.999878
CECR5	3951732	ILMN_1654690	1340470	0.000202482	-1.08824	-0.261295	0.68207	0.284718	-1.59549	-0.917733	0.110665	0.358759	0.522516	0.999878
CECR6	3951719	ILMN_1702229	6200161	0.000294835	-1.30398	-0.228672	0.812296	0.239442	-1.60531	-0.955017	0.108489	0.339569	0.518568	0.999878
CEL	3192693	ILMN_1723418	6650593	-0.000186142	0.260419	-0.615965	0.657357	0.466244	0.39616	-1.32112	0.692004	0.186461	0.925472	0.999878
CELA1	3454877	ILMN_1805902	2710309	-0.000206579	-0.257651	0.333379	0.486473	0.39294	-0.52963	0.848423	0.596392	0.396202	0.892406	0.999878
CELA2B	2321828	ILMN_1688458	6660634	0.000136659	-0.633811	-0.364946	0.634301	0.624923	-0.999228	-0.583986	0.317732	0.55923	0.744299	0.999878
CELA3B	2324571	ILMN_1749515	7510072	4.33e-05	-0.680091	-0.316798	0.842125	0.502075	-0.807589	-0.630977	0.419366	0.528055	0.811892	0.999878
CELF5	3816883	ILMN_1672871	6290307	0.000146244	1.82068	0.447262	1.05748	0.431034	1.72172	1.03765	0.0851822	0.299434	0.469737	0.999878
CELSR1	3964049	ILMN_1694482	2970598	0.000272457	-1.77657	0.5361	1.32536	0.506488	-1.34044	1.05847	0.180162	0.289843	0.625453	0.999878
CELSR2	2350596	ILMN_1711208	3710240	0.000334115	2.08525	-0.764637	1.35196	0.501578	1.5424	-1.52446	0.123039	0.127393	0.541779	0.999878
CEMP1	3676913	ILMN_2280816	540400	-0.000132451	-0.211745	-0.0525823	0.372055	0.448668	-0.569124	-0.117197	0.569297	0.906704	0.880411	0.999878
CENPA	2473991	ILMN_1801257	2600392	-0.000200844	0.123744	0.0673877	0.594574	0.56231	0.208122	0.119841	0.835142	0.904609	0.964308	0.999878
CENPB	3895722	ILMN_1664028	610056	0.000121996	-0.994843	-0.016817	0.875307	0.208597	-1.13656	-0.0806195	0.255774	0.935745	0.698802	0.999878
CENPBD1	3705135	ILMN_1692072	6350075	-0.000204628	-0.0248404	0.183601	0.51854	0.364466	-0.0479044	0.503754	0.961794	0.614434	0.993051	0.999878
CENPC	2771654	ILMN_2229205	2810731	0.000412187	-0.820689	-0.391383	0.431957	0.426738	-1.89993	-0.917152	0.0574987	0.359063	0.406847	0.999878
CENPE	2780172	ILMN_1716279	6100564	9.68e-05	0.685452	0.183073	0.565478	0.478298	1.21216	0.382759	0.225506	0.701898	0.674113	0.999878
CENPF	2379863	ILMN_1664516	4780129	-0.000185827	0.168958	-0.216234	0.636168	0.46865	0.265587	-0.461397	0.790568	0.644514	0.94988	0.999878
CENPH	2813442	ILMN_2186715	5820315	-0.000196936	0.039904	0.199257	0.481137	0.520687	0.0829369	0.382682	0.933905	0.701956	0.987977	0.999878
CENPI	3984655	ILMN_1658010	6250451	-9.47e-05	0.215207	0.540492	0.452464	0.498468	0.475633	1.08431	0.634356	0.278229	0.907805	0.999878
CENPK	2859667	ILMN_1737195	5700086	-1.01e-06	0.228554	-0.153374	0.217459	0.373521	1.05102	-0.410617	0.293299	0.681353	0.726764	0.999878
CENPL	2444451	ILMN_1742779	4060468	8.7e-05	0.616072	-0.563143	0.53632	0.476052	1.1487	-1.18294	0.250733	0.236832	0.696597	0.999878
CENPN	3670631	ILMN_1720526	3890475	-0.000110751	0.214021	0.00565512	0.413085	0.455856	0.518104	0.0124055	0.604409	0.990102	0.894311	0.999878
CENPO	2473284	ILMN_2219351	7160048	0.00114069	1.50892	-0.211206	0.497819	0.577878	3.03105	-0.365485	0.00244941	0.714749	0.0876092	0.999878
CENPP	3179359	ILMN_1748241	6250196	-0.000122776	0.332975	0.395886	0.489137	0.61594	0.68074	0.642734	0.496067	0.520396	0.848881	0.999878
CENPQ	2909723	ILMN_1670769	2350630	-0.000196366	-0.00950871	-0.856147	0.450723	0.522564	-0.0210966	-1.63836	0.983169	0.101347	0.997785	0.999878
CENPT	3695916	ILMN_1777129	6940554	-0.000198643	0.0524606	0.194289	0.752202	0.344881	0.0697426	0.563351	0.944401	0.573196	0.990647	0.999878
CENPV	3747199	ILMN_1729142	1030026	-0.00019457	0.197675	0.54323	0.504071	0.226076	0.392158	2.40287	0.694958	0.0162671	0.92613	0.999878
CEP104	2393740	ILMN_2228453	6650288	0.00106448	1.69631	0.135194	0.677995	0.455055	2.50195	0.297093	0.0123826	0.766395	0.200551	0.999878
CEP120	2873168	ILMN_1781077	7150370	-0.000132523	-0.626946	-0.627522	0.887829	0.425722	-0.706156	-1.47402	0.480124	0.140476	0.840767	0.999878
CEP128	3573994	ILMN_1806825	3830164	0.000244286	0.560524	-0.0757004	0.402904	0.42259	1.39121	-0.179135	0.164223	0.857832	0.602585	0.999878
CEP135	2727976	ILMN_1693766	270022	-0.000197756	-0.060095	-0.472902	0.566469	0.333535	-0.106087	-1.41785	0.915518	0.156235	0.982992	0.999878
CEP170B	3554452	ILMN_1664960	4180086	-0.000192572	0.142136	-0.591526	0.621938	0.58192	0.228536	-1.01651	0.819238	0.309388	0.959429	0.999878
CEP19	2713016	ILMN_2288483	1850040	-0.000105461	0.23846	-0.125783	0.310188	0.122946	0.768758	-1.02308	0.442073	0.306272	0.825567	0.999878
CEP192	3779817	ILMN_1797642	4180754	-9.02e-05	-0.45693	-0.646605	0.651339	0.433898	-0.701523	-1.49022	0.483009	0.136165	0.842466	0.999878
CEP250	3883309	ILMN_1799011	5700689	0.000623493	2.20531	-0.0227862	1.13416	0.437597	1.94445	-0.0520713	0.0518969	0.958472	0.389874	0.999878
CEP290	3464622	ILMN_1746832	4780112	9.81e-05	-0.783318	-0.211578	0.557643	0.530665	-1.40469	-0.398703	0.160174	0.690112	0.597425	0.999878
CEP350	2369843	ILMN_1742400	5340553	3.5e-05	-0.803156	0.0697757	0.666193	0.303028	-1.20559	0.230262	0.228032	0.817889	0.676466	0.999878
CEP55	3258444	ILMN_1747016	7510709	0.000928571	-1.47	-0.493643	0.600445	0.518289	-2.44818	-0.952447	0.0143918	0.34087	0.215172	0.999878
CEP57	3345593	ILMN_1791568	7100519	-0.000192287	0.0479668	-0.696679	0.65947	0.374961	0.0727354	-1.85801	0.94202	0.0631682	0.9902	0.999878
CEP68	2485688	ILMN_1808500	1110039	-0.00019386	0.0876926	-0.542523	0.792218	0.400141	0.110692	-1.35583	0.911865	0.175153	0.981773	0.999878
CEP70	2697490	ILMN_1741350	4640242	0.000495716	0.723126	-0.247721	0.499787	0.560248	1.44687	-0.442163	0.147996	0.658371	0.575088	0.999878
CEP72	2798777	ILMN_1800611	1030368	-0.000189661	-0.103486	0.229564	0.911518	0.378212	-0.113531	0.60697	0.909614	0.543871	0.981059	0.999878
CEP85	2326410	ILMN_1812489	1990730	-9.09e-05	-0.265751	-0.399994	0.632337	0.414342	-0.420267	-0.965371	0.674308	0.334359	0.920623	0.999878
CEP89	3858794	ILMN_1679971	4730215	-9.72e-05	0.373908	-0.313159	0.700851	0.448845	0.533505	-0.6977	0.593708	0.485365	0.890571	0.999878
CEP95	3731228	ILMN_1686135	2070593	-3.39e-05	0.540049	-0.151741	0.629823	0.397155	0.857463	-0.38207	0.39123	0.70241	0.795445	0.999878
CEP97	2634027	ILMN_1736951	7400575	4.88e-05	0.922631	-0.43913	0.564622	0.456283	1.63407	-0.962408	0.102307	0.335845	0.505245	0.999878
CER1	3199500	ILMN_1690192	4780242	-0.000169667	0.295136	0.194867	0.381856	0.467488	0.7729	0.416839	0.439618	0.676796	0.825053	0.999878
CERCAM	3190420	ILMN_1750563	7550048	-0.000205697	0.120999	-0.595798	0.887289	0.487281	0.136369	-1.2227	0.891535	0.221444	0.976166	0.999878
CERK	3964154	ILMN_1721325	4050041	0.000230096	-0.956549	0.0247954	0.823963	0.453923	-1.16091	0.0546246	0.245732	0.956438	0.693066	0.999878
CERS2	2434716	ILMN_1726108	6380154	-0.000208701	-0.292347	-0.156515	0.771049	0.313351	-0.379155	-0.499488	0.704589	0.617435	0.928286	0.999878
CERS3	3641777	ILMN_1743142	6510187	0.00044992	-1.28106	0.788104	0.686832	0.485823	-1.86517	1.6222	0.0622151	0.10476	0.420123	0.999878
CES2	3664982	ILMN_1696675	3520372	-8.26e-05	0.623964	-0.425964	1.17687	0.327769	0.530189	-1.29958	0.596004	0.193743	0.892155	0.999878
CES3	3665029	ILMN_2165975	1780470	-0.000179889	0.237024	0.124956	0.883769	0.165135	0.268196	0.756689	0.788559	0.449236	0.94898	0.999878
CES4A	3665049	ILMN_1699852	5260019	-0.000136121	0.457932	-0.152962	0.73531	0.498991	0.622773	-0.306543	0.533462	0.759191	0.868091	0.999878
CES5A	3692735	ILMN_1784870	1990246	-0.000198976	0.0328512	-0.233761	0.584956	0.45072	0.0561602	-0.51864	0.955216	0.604012	0.992443	0.999878
CETN1	3775800	ILMN_2132309	3520097	0.00154852	0.984838	-0.587786	0.372626	0.434034	2.64297	-1.35424	0.00824374	0.17566	0.164465	0.999878
CETN2	4026263	ILMN_1695645	2120707	4e-05	0.346037	0.254095	0.3616	0.280117	0.956961	0.907103	0.338633	0.364352	0.76115	0.999878
CETN3	2866543	ILMN_2224034	1300709	0.000164552	-0.50845	-0.149252	0.439734	0.498502	-1.15627	-0.299401	0.247627	0.764634	0.694739	0.999878
CETP	3662417	ILMN_2098013	7510079	-9.98e-05	0.583276	0.740806	0.876718	0.490887	0.665295	1.50912	0.505892	0.131269	0.854298	0.999878
CFD	3815243	ILMN_1777190	1240152	0.000800126	-0.666046	-0.026536	0.281782	0.0480602	-2.36369	-0.55214	0.0181316	0.580852	0.239898	0.999878
CFDP1	3699508	ILMN_1800837	6200494	-6.1e-05	0.524997	-0.431712	0.592557	0.325777	0.885986	-1.32518	0.375667	0.185112	0.784627	0.999878
CFHR2	2373494	ILMN_2045453	3120601	-4.61e-05	0.345381	0.322037	0.334345	0.359852	1.03301	0.894914	0.30165	0.370833	0.731548	0.999878
CFHR4	2373465	ILMN_1665855	5050128	-0.000150836	-0.302516	0.155128	0.537069	0.589537	-0.563272	0.263135	0.573275	0.792447	0.882485	0.999878
CFHR5	2373511	ILMN_1718248	5310292	-0.00018719	-0.0621388	0.240751	0.704009	0.563855	-0.0882643	0.426974	0.92967	0.669398	0.986572	0.999878
CFI	2781736	ILMN_1727815	1690609	-0.000106646	-0.331267	-0.319218	0.80805	0.363889	-0.409958	-0.877238	0.681854	0.380358	0.922497	0.999878
CFL2	3560673	ILMN_2291891	5810300	0.000292864	-0.534929	0.0016615	0.384654	0.483312	-1.39067	0.00343774	0.164386	0.997257	0.602814	0.999878
CFTR	3020646	ILMN_1705813	5870131	0.000142385	1.76292	0.194914	1.1732	0.471946	1.50266	0.413001	0.132989	0.679606	0.555272	0.999878
CGA	2963614	ILMN_1734176	2350730	0.000161764	0.688534	-0.192823	0.516225	0.414432	1.33379	-0.465272	0.182335	0.641737	0.629338	0.999878
CGN	2358949	ILMN_1746801	1980670	-4.11e-05	0.673528	1.03594	0.962546	0.581622	0.699735	1.78113	0.484125	0.0748919	0.842548	0.999878
CH25H	3299578	ILMN_1741021	1770593	-0.000184104	-0.0732043	0.195709	0.485005	0.489323	-0.150935	0.399959	0.880033	0.689187	0.973774	0.999878
CHAC1	3590275	ILMN_1739241	1500082	-0.000157379	0.177336	0.325522	0.44979	0.56369	0.394265	0.577484	0.693402	0.563613	0.925714	0.999878
CHAC2	2482211	ILMN_2148150	2850082	-0.000187163	0.153548	-0.0289942	0.50362	0.547468	0.304889	-0.0529606	0.760463	0.957763	0.94349	0.999878
CHAD	3762380	ILMN_1700652	4890167	0.000292049	-0.813612	0.101495	0.531389	0.578072	-1.5311	0.175575	0.125806	0.860628	0.544549	0.999878
CHAF1A	3817501	ILMN_1669842	2120097	-0.000104092	0.474086	-0.198276	0.74524	0.519706	0.636152	-0.381515	0.524706	0.702821	0.8644	0.999878
CHAF1B	3920003	ILMN_1674231	4610731	3.27e-05	-0.714063	-0.475326	0.608028	0.479579	-1.17439	-0.991132	0.240294	0.321621	0.688922	0.999878
CHCHD1	3251916	ILMN_1672149	7570619	-0.00019981	0.0171542	-0.138448	0.393599	0.393895	0.043583	-0.351486	0.965239	0.725224	0.993902	0.999878
CHCHD10	3954887	ILMN_1740170	940010	-6.8e-05	0.366958	-0.159917	0.393033	0.211073	0.933655	-0.757637	0.350527	0.448669	0.765784	0.999878
CHCHD2	3051928	ILMN_2191681	4540730	-0.000178516	0.291046	0.0531255	0.373986	0.105419	0.778228	0.503946	0.436471	0.614299	0.82347	0.999878
CHCHD3	3073597	ILMN_1673026	6620626	-0.000170714	0.126256	-0.322843	0.309578	0.437251	0.407834	-0.738345	0.683413	0.460305	0.923108	0.999878
CHCHD5	2500875	ILMN_1797530	6900392	-0.000198331	-0.00943123	-0.105588	0.476052	0.342788	-0.0198114	-0.308026	0.984195	0.758063	0.997785	0.999878
CHCHD7	3099089	ILMN_2324375	3850180	7.73e-06	-0.597373	-0.76888	0.470926	0.374538	-1.26851	-2.05288	0.204676	0.0400847	0.654028	0.999878
CHD1	2868523	ILMN_1654583	2350176	0.00138954	-1.60268	-0.258409	0.555731	0.293309	-2.88391	-0.881013	0.00394431	0.378311	0.112361	0.999878
CHD4	3442054	ILMN_1658411	430224	-9.53e-05	-0.457237	-0.0194638	0.614806	0.224445	-0.743708	-0.0867194	0.457088	0.930895	0.832931	0.999878
CHD5	2394478	ILMN_1698148	1500563	-0.000115702	-0.593807	0.319012	1.45002	0.431935	-0.409515	0.738566	0.682179	0.460171	0.922588	0.999878
CHD6	3906160	ILMN_2209163	4250082	0.000368991	1.23261	-0.216315	0.66072	0.40522	1.86556	-0.533821	0.0621614	0.593465	0.420123	0.999878
CHD9	3660858	ILMN_1762972	1710474	0.000162247	-0.85802	0.239906	0.5857	0.233142	-1.46495	1.02901	0.142997	0.303474	0.568563	0.999878
CHDC2	3973556	ILMN_1714718	1990347	-0.000209575	-0.0772936	0.349117	0.742592	0.392253	-0.104086	0.89003	0.917105	0.37345	0.983233	0.999878
CHDH	2676854	ILMN_2135321	3520437	-8.68e-05	-0.394285	-0.51745	0.6936	0.424495	-0.568463	-1.21898	0.569746	0.222853	0.880411	0.999878
CHEK2	3956433	ILMN_2395236	5260685	6.78e-05	0.662256	0.130644	0.60695	0.452515	1.09112	0.288706	0.275272	0.772806	0.714033	0.999878
CHFR	3479438	ILMN_1653828	830168	-0.000160884	0.3837	0.195315	1.00216	0.280547	0.382874	0.696193	0.701829	0.486308	0.928286	0.999878
CHGA	3549092	ILMN_1669410	6200348	-0.000113237	-0.467789	-0.698291	0.897435	0.417156	-0.521251	-1.67393	0.602215	0.094144	0.893755	0.999878
CHGB	3875179	ILMN_1765966	6420356	-9.88e-05	-0.389246	0.128498	0.59352	0.523634	-0.655826	0.245397	0.511966	0.806149	0.857727	0.999878
CHI3L2	2351687	ILMN_1685045	4830202	0.000221742	-0.613157	-0.184306	0.45012	0.55217	-1.36221	-0.333784	0.173193	0.738542	0.613991	0.999878
CHIA	2351763	ILMN_1679647	2350204	-0.000144986	0.536623	0.216475	0.817154	0.443911	0.656698	0.487655	0.511405	0.625794	0.857727	0.999878
CHIC2	2769539	ILMN_1679428	3130576	4.4e-05	-0.695571	0.27123	0.594131	0.241053	-1.17074	1.12519	0.24176	0.260509	0.691108	0.999878
CHKA	3379326	ILMN_1691151	6330170	-7.18e-05	-0.642915	0.107368	0.7004	0.433747	-0.917925	0.247535	0.358702	0.804494	0.771299	0.999878
CHML	2463515	ILMN_1747697	1780240	0.000394481	-0.788096	0.4713	0.434281	0.460683	-1.81471	1.02305	0.0696273	0.306286	0.434945	0.999878
CHMP1A	3704896	ILMN_1709439	5900332	-0.00019611	0.021882	-0.116522	0.793445	0.275063	0.0275784	-0.42362	0.977999	0.671843	0.9974	0.999878
CHMP1B	3779314	ILMN_1763265	3940148	-0.000198056	-0.0781378	-0.11903	0.485404	0.197222	-0.160975	-0.603532	0.87212	0.546155	0.972005	0.999878
CHMP2A	3872983	ILMN_1656621	3290181	-0.000208056	-0.220056	-0.173874	0.799029	0.219456	-0.275404	-0.792297	0.783017	0.428188	0.948562	0.999878
CHMP2B	2631845	ILMN_1741176	6250121	-9.18e-05	-0.292614	-0.552226	0.562569	0.296695	-0.520139	-1.86126	0.602989	0.0627075	0.893755	0.999878
CHMP4B	3882681	ILMN_1771233	4180315	-0.000185901	0.142367	-0.525413	0.447081	0.305203	0.318436	-1.72152	0.750167	0.0851569	0.940913	0.999878
CHMP4C	3105033	ILMN_1711542	2490554	-0.000126869	0.224158	0.07514	0.576648	0.463041	0.388725	0.162275	0.697496	0.871089	0.926738	0.999878
CHMP5	3166844	ILMN_1732534	7650347	7.3e-05	-0.385102	-0.0543904	0.396855	0.236287	-0.970384	-0.230188	0.331902	0.817946	0.755583	0.999878
CHMP6	3737647	ILMN_1731609	4480592	-8.75e-05	-0.56314	-0.43658	0.798059	0.34399	-0.705637	-1.26917	0.480446	0.204382	0.840868	0.999878
CHMP7	3089853	ILMN_1795933	3440692	-0.000198341	0.0305534	-0.466198	0.605292	0.37765	0.0504771	-1.23447	0.959744	0.217027	0.992947	0.999878
CHN1	2587961	ILMN_1678493	610332	2.39e-05	-0.44597	-0.583129	0.427834	0.444932	-1.04239	-1.3106	0.297281	0.189992	0.729057	0.999878
CHN2	2994835	ILMN_1774110	830687	0.000299428	-0.743097	0.166054	0.570097	0.453423	-1.30346	0.366224	0.192478	0.714198	0.641239	0.999878
CHODL	3915569	ILMN_1726575	5690241	-0.000136223	0.404551	0.594128	0.759839	0.486244	0.532417	1.22187	0.594461	0.221756	0.890951	0.999878
CHORDC1	3386217	ILMN_2223836	2370674	2.07e-05	-0.191852	-0.345854	0.159463	0.478607	-1.20312	-0.722628	0.228988	0.469909	0.677628	0.999878
CHP1	3590341	ILMN_1779401	6760192	0.00121449	1.21883	-0.278124	0.489012	0.268305	2.49244	-1.0366	0.0127187	0.299923	0.203804	0.999878
[truncated: 10,051 more rows]
