# Supplementary material for: Peripheral Blood Transcriptomic Signatures of Fasting Glucose and Insulin Concentrations
Source: Oxford University Press journal article supplement (doi:10.2337/db16-0470), 2016-09-13
Supplement: db160470supplementarydata6.xlsx [file db160470supplementarydata6.xlsx]

## Sheet: DB160470SupplementaryData6
Rs_ID	SNP_Chr	SNP_Pos_hg19	Transcript_Chr	Is_Cis	SNP_Non_Fx_Allele	SNP_Fx_Allele	T	RSq	Transcript_GeneSymbol	Transcript_Cluster_ID	log10P	FDR.x	Allele1	Allele2	Freq1	FreqSE	MinFreq	MaxFreq	Effect	StdErr	P.value	Direction	HetISq	HetChiSq	HetDf	HetPVal	FDR.y
rs1005678	3	50210289	22	0	C	G	-12.8884	0.0306526	RAB36	3939154	-36.7158	9.39932e-27	c	g	0.6069	0.0265	0.5615	0.6528	-0.0099	0.0036	0.006078	---+----+--+-+-+---+--+	0	14.47	22	0.884	0.047471
rs1049256	3	49763338	22	0	T	C	14.439	0.0381737	RAB36	3939154	-45.6479	1.27627e-35	t	c	0.4325	0.0651	0.3531	0.515	0.0141	0.0036	8e-05	+++-+++++?++++-++++-++-	0	17.694	21	0.6683	0.00337951
rs1062633	3	49924940	22	0	C	T	18.7153	0.0625105	RAB36	3939154	-74.9877	1.62475e-64	t	c	0.5478	0.0506	0.47	0.6186	-0.0114	0.0036	0.00138	--++-----?+-+------++--	0	20.421	21	0.4947	0.0232037
rs1078341	3	49685592	22	0	A	G	7.93109	0.0118328	RAB36	3939154	-14.5794	1.13976e-05	a	g	0.1533	0.0345	0.0975	0.1957	0.0142	0.005	0.004623	+++-++++-+-+--+++++-+++	0	21.243	22	0.5057	0.0425879
rs11130218	3	49752372	22	0	C	T	14.5043	0.0385063	RAB36	3939154	-46.0443	5.60554e-36	t	c	0.5677	0.065	0.485	0.6469	-0.0141	0.0036	8.107e-05	---+-----?----+----+--+	0	17.669	21	0.6698	0.00337951
rs11130221	3	49819102	22	0	G	C	14.5279	0.0386269	RAB36	3939154	-46.1881	4.17292e-36	c	g	0.568	0.0647	0.4847	0.6469	-0.0141	0.0036	7.502e-05	---+-----?----+----+--+	0	17.36	21	0.6891	0.00337951
rs11130228	3	50003246	22	0	T	C	19.6795	0.0686637	RAB36	3939154	-82.5194	1.26724e-71	t	c	0.4855	0.0299	0.4418	0.5481	0.0109	0.0035	0.001933	++--+++++++++++++++--++	8.3	24.001	22	0.3472	0.0232037
rs11130233	3	50018585	22	0	G	T	19.6371	0.0683884	RAB36	3939154	-82.1814	1.96671e-71	t	g	0.5142	0.0302	0.4519	0.5582	-0.011	0.0035	0.001762	--++---------------++--	8.8	24.119	22	0.341	0.0232037
rs1128535	3	49866392	22	0	T	C	14.6095	0.0390451	RAB36	3939154	-46.6866	1.38592e-36	t	c	0.4315	0.0646	0.3526	0.5153	0.0139	0.0036	9.547e-05	+++-+++++?-+++-+-++-++-	0	17.814	21	0.6607	0.00349526
rs11709680	3	49745188	22	0	C	T	14.4862	0.0384139	RAB36	3939154	-45.9341	7.08496e-36	t	c	0.5681	0.0648	0.485	0.6469	-0.0141	0.0036	8.15e-05	---+-----?----+----+--+	0	17.564	21	0.6764	0.00337951
rs11709734	3	49745235	22	0	G	A	7.73647	0.0112657	RAB36	3939154	-13.9146	4.72416e-05	a	g	0.8467	0.0343	0.804	0.9025	-0.0137	0.005	0.006195	---+-----++-++-----+---	0	21.833	22	0.4699	0.047471
rs11713193	3	49924424	22	0	A	G	18.8491	0.0633505	RAB36	3939154	-76.0131	1.67586e-65	a	g	0.452	0.0503	0.3814	0.53	0.0116	0.0036	0.001154	++--++++++-+-++++++--++	0	19.954	22	0.5859	0.0217282
rs11716575	3	49744890	22	0	A	G	14.4863	0.0384147	RAB36	3939154	-45.9351	7.08496e-36	a	g	0.4319	0.0648	0.3531	0.515	0.0141	0.0036	8.162e-05	+++-+++++?++++-++++-++-	0	17.543	21	0.6777	0.00337951
rs12496973	3	50002245	22	0	C	T	19.6792	0.0686615	RAB36	3939154	-82.5168	1.26724e-71	t	c	0.5145	0.0299	0.4519	0.5582	-0.0109	0.0035	0.001953	--++---------------++--	8.2	23.966	22	0.349	0.0232037
rs13100903	3	50174572	22	0	T	C	13.3546	0.0328365	RAB36	3939154	-39.3033	2.51503e-29	t	c	0.322	0.0446	0.1414	0.3845	0.0104	0.0038	0.006495	++--++++++-++-+-+-+-++-	0	19.361	22	0.623	0.0480922
rs1352889	3	49652148	22	0	T	C	7.95401	0.0119005	RAB36	3939154	-14.6587	9.73712e-06	t	c	0.1537	0.0344	0.0974	0.198	0.0141	0.005	0.004856	+++-++++---+--+++++-+++	0	21.833	22	0.4699	0.043837
rs1491985	3	49739507	22	0	G	C	7.73053	0.0112486	RAB36	3939154	-13.8945	4.93277e-05	c	g	0.8469	0.0343	0.8041	0.9025	-0.0137	0.005	0.006132	---+-----++-++-----+---	0	21.896	22	0.4661	0.047471
rs1586827	3	49671224	22	0	T	C	7.94303	0.0118681	RAB36	3939154	-14.6207	1.05103e-05	t	c	0.1536	0.0348	0.091	0.1959	0.0144	0.005	0.004043	+++-++++-+-+--+++++-+++	0	21.188	22	0.5092	0.0397662
rs1996664	3	49878395	22	0	G	A	7.98394	0.0119892	RAB36	3939154	-14.7626	7.81164e-06	a	g	0.8467	0.0342	0.8024	0.9026	-0.0136	0.005	0.00676	---+-----++-+------+---	1.4	22.319	22	0.441	0.0489543
rs2131108	3	49665390	22	0	G	A	7.94425	0.0118717	RAB36	3939154	-14.6249	1.04259e-05	a	g	0.8464	0.0348	0.804	0.9099	-0.0143	0.005	0.004122	---+----+-+-++-----+---	0	21.276	22	0.5037	0.039947
rs2188151	3	50201924	22	0	T	G	12.9646	0.0310051	RAB36	3939154	-37.1331	3.62943e-27	t	g	0.393	0.0268	0.3481	0.4394	0.0101	0.0036	0.005451	+++-++++-++-+-+-+++-++-	0	15.688	22	0.8311	0.0466521
rs2230590	3	49936102	22	0	C	T	18.7643	0.0628178	RAB36	3939154	-75.3627	7.00649e-65	t	c	0.5476	0.0507	0.4697	0.6186	-0.0119	0.0036	0.0008294	--++------+-+------++--	0	20.372	22	0.5598	0.0176314
rs2234391	3	49842625	22	0	G	A	14.6716	0.0393645	RAB36	3939154	-47.0676	5.99397e-37	a	g	0.5681	0.0647	0.4846	0.647	-0.014	0.0036	8.528e-05	---+-----?+---+----+--+	0	17.471	21	0.6822	0.00337951
rs2245365	3	50097319	22	0	C	A	19.7333	0.0690134	RAB36	3939154	-82.949	8.7074e-72	a	c	0.5123	0.0289	0.4522	0.5549	-0.0109	0.0035	0.00188	--++-----------+---++--	5	23.158	22	0.3928	0.0232037
rs2246832	3	49881134	22	0	T	A	14.7053	0.0395383	RAB36	3939154	-47.275	3.78549e-37	a	t	0.569	0.064	0.485	0.6474	-0.0138	0.0036	0.0001181	---+-----?+---+-+--+--+	0	17.863	21	0.6577	0.0038914
rs2252833	3	50004209	22	0	A	G	19.6733	0.0686233	RAB36	3939154	-82.4698	1.30866e-71	a	g	0.4858	0.0301	0.4418	0.5481	0.0109	0.0035	0.001785	++--+++++++++++++++--++	8.6	24.06	22	0.3441	0.0232037
rs2271960	3	49878078	22	0	C	T	14.7634	0.0398391	RAB36	3939154	-47.6338	1.67952e-37	t	c	0.5688	0.0642	0.485	0.6474	-0.0137	0.0036	0.0001326	---+-----?+---+-+--+--+	0	17.878	21	0.6567	0.00397197
rs2271961	3	49878113	22	0	C	T	14.6835	0.0394258	RAB36	3939154	-47.1407	5.1104e-37	t	c	0.5688	0.0642	0.4851	0.6474	-0.0137	0.0036	0.0001299	---+-----?+---+-+--+--+	0	17.803	21	0.6614	0.00397197
rs2280405	3	49895052	22	0	G	C	13.0647	0.0314705	RAB36	3939154	-37.6843	1.03614e-27	c	g	0.5038	0.0456	0.4356	0.5621	-0.0122	0.0038	0.001488	---+-----?----+-+--+---	0	16.536	21	0.7388	0.0232037
rs2280406	3	49941436	22	0	A	G	18.6998	0.0624135	RAB36	3939154	-74.8693	2.09669e-64	a	g	0.4327	0.0436	0.3709	0.5061	0.011	0.0036	0.002272	++--+++++?++-++++++--++	0	20.077	21	0.5164	0.0258146
rs2329021	3	49679072	22	0	G	A	7.935	0.0118444	RAB36	3939154	-14.5929	1.11003e-05	a	g	0.8463	0.0344	0.8043	0.9025	-0.0144	0.005	0.003849	---+----+-+-++-----+---	0	21.452	22	0.493	0.0396199
rs2352974	3	49890613	22	0	T	C	14.6036	0.0390147	RAB36	3939154	-46.6504	1.50026e-36	t	c	0.432	0.0603	0.3601	0.5176	0.0137	0.0036	0.0001487	+++-+++++?-+++-++++-++-	0	17.581	21	0.6754	0.00426058
rs2353579	3	50027774	22	0	T	C	19.7044	0.0688255	RAB36	3939154	-82.7182	9.46477e-72	t	c	0.4908	0.0321	0.4442	0.5492	0.0114	0.0035	0.00115	++--+++++++++++++++--++	11.3	24.792	22	0.3071	0.0217282
rs2518796	3	50207075	22	0	C	T	12.9823	0.031087	RAB36	3939154	-37.2301	2.91166e-27	t	c	0.6068	0.0266	0.5614	0.6547	-0.0101	0.0036	0.005189	---+----+--+-+-+---+--+	0	15.087	22	0.8585	0.045594
rs2526748	3	50080439	22	0	A	G	19.7163	0.0689029	RAB36	3939154	-82.8132	8.7074e-72	a	g	0.4877	0.0288	0.4451	0.548	0.0111	0.0035	0.001573	++--+++++++++++++++--++	6.4	23.495	22	0.3743	0.0232037
rs2624824	3	50088266	22	0	T	C	19.346	0.06651	RAB36	3939154	-79.8778	2.7596e-69	t	c	0.4769	0.0277	0.4373	0.5353	0.0098	0.0035	0.005356	++--+++++++++++-+++--+-	4	22.913	22	0.4067	0.0464422
rs2624839	3	50202231	22	0	T	C	-12.8573	0.0305097	RAB36	3939154	-36.5466	1.38328e-26	t	c	0.6062	0.0272	0.55	0.6541	-0.0102	0.0036	0.004653	---+----+--+-+-+---+--+	0	15.02	22	0.8614	0.0425879
rs2624843	3	49997963	22	0	A	G	19.6653	0.0685714	RAB36	3939154	-82.4062	1.34909e-71	a	g	0.4855	0.0299	0.4418	0.5481	0.0108	0.0035	0.001992	++--+++++++++++++++--++	8.4	24.013	22	0.3465	0.0232037
rs2681780	3	49897830	22	0	T	C	18.3342	0.0601424	RAB36	3939154	-72.1016	1.14913e-61	t	c	0.4472	0.0504	0.377	0.5257	0.0124	0.0036	0.0005776	++--+++++?-++++-+++--+-	0	16.779	21	0.7244	0.0126879
rs2681781	3	49898273	22	0	G	A	18.3453	0.0602109	RAB36	3939154	-72.185	9.57219e-62	a	g	0.5511	0.0517	0.4741	0.6229	-0.0124	0.0036	0.0005585	--++------+----+---++-+	0	16.465	22	0.7922	0.0126879
rs2777888	3	49898000	22	0	G	A	18.0179	0.0582046	RAB36	3939154	-69.7452	2.54112e-59	a	g	0.5524	0.0505	0.4741	0.6229	-0.0125	0.0036	0.0004935	--++------+----+---++-+	0	17.032	22	0.7616	0.0116149
rs2883057	3	49998282	22	0	T	C	19.6826	0.0686842	RAB36	3939154	-82.5446	1.25468e-71	t	c	0.4855	0.0299	0.4418	0.5481	0.0109	0.0035	0.001954	++--+++++++++++++++--++	8.2	23.96	22	0.3494	0.0232037
rs3020779	3	49724808	22	0	T	C	7.80199	0.0114551	RAB36	3939154	-14.1366	2.91672e-05	t	c	0.1536	0.0343	0.0975	0.1959	0.0137	0.005	0.006153	+++-++++---+--+++++-+++	0	21.801	22	0.4718	0.047471
rs3749240	3	49750188	22	0	T	A	14.4721	0.0383421	RAB36	3939154	-45.8486	8.21683e-36	a	t	0.5678	0.065	0.485	0.6469	-0.0141	0.0036	8.118e-05	---+-----?----+----+--+	0	17.642	21	0.6715	0.00337951
rs3774733	3	50037123	22	0	G	C	19.7456	0.0690941	RAB36	3939154	-83.0481	8.7074e-72	c	g	0.5128	0.0292	0.452	0.5551	-0.0111	0.0035	0.0016	--++---------------++--	7.7	23.844	22	0.3555	0.0232037
rs4688689	3	50035542	22	0	T	C	19.7424	0.0690727	RAB36	3939154	-83.0217	8.7074e-72	t	c	0.487	0.0292	0.4448	0.548	0.0109	0.0035	0.001801	++--++++++-++++++++--+-	11.4	24.821	22	0.3057	0.0232037
rs4688690	3	50022292	22	0	A	G	19.7155	0.0688978	RAB36	3939154	-82.8069	8.7074e-72	a	g	0.4859	0.0302	0.4418	0.5481	0.011	0.0035	0.001763	++--+++++++++++++++--++	8.8	24.121	22	0.3409	0.0232037
rs4688758	3	50028385	22	0	A	G	19.7201	0.0689281	RAB36	3939154	-82.8441	8.7074e-72	a	g	0.4902	0.0327	0.4442	0.5492	0.0115	0.0035	0.001065	++--+++++++++++++++--++	12.1	25.019	22	0.2962	0.0212677
rs4855833	3	49657441	22	0	A	G	7.95031	0.0118896	RAB36	3939154	-14.6459	9.99528e-06	a	g	0.154	0.0344	0.0975	0.196	0.014	0.005	0.004951	+++-++++---+--+++++-+++	0	21.94	22	0.4634	0.0440907
rs4855845	3	49687043	22	0	T	C	7.93219	0.0118361	RAB36	3939154	-14.5832	1.13165e-05	t	c	0.1536	0.0344	0.0975	0.1957	0.0144	0.005	0.003961	+++-++++-+-+--+++++-+++	0	21.417	22	0.4951	0.0396199
rs4855862	3	49748833	22	0	C	T	14.4825	0.0383952	RAB36	3939154	-45.9118	7.31716e-36	t	c	0.5678	0.065	0.485	0.6469	-0.0141	0.0036	8.012e-05	---+-----?----+----+--+	0	17.623	21	0.6727	0.00337951
rs4855867	3	49745822	22	0	C	T	14.4855	0.0384104	RAB36	3939154	-45.93	7.09876e-36	t	c	0.5679	0.0649	0.485	0.6469	-0.0141	0.0036	8.15e-05	---+-----?----+----+--+	0	17.585	21	0.6751	0.00337951
rs4855882	3	49715354	22	0	G	T	7.90363	0.011752	RAB36	3939154	-14.4846	1.39592e-05	t	g	0.8462	0.0344	0.8042	0.9021	-0.0138	0.005	0.005754	---+----+++-++-----+---	0	21.327	22	0.5006	0.0473986
rs4855885	3	49690199	22	0	G	A	7.92477	0.0118142	RAB36	3939154	-14.5575	1.1927e-05	a	g	0.8464	0.0344	0.8042	0.9025	-0.0144	0.005	0.003968	---+----+-+-++-----+---	0	21.403	22	0.4959	0.0396199
rs590856	6	139844429	3	0	A	G	-7.0889	0.00947578	IGF2BP2	2708922	-11.8152	0.00417405	a	g	0.5198	0.0445	0.4685	0.6402	-0.0099	0.0037	0.006954	------++--+---+--++-+--	12.6	25.166	22	0.2892	0.0498118
rs592423	6	139840693	3	0	C	A	-7.19816	0.00976726	IGF2BP2	2708922	-12.1572	0.00203495	a	c	0.4812	0.0444	0.3593	0.5326	0.0098	0.0036	0.00649	++++++--++-+++-++--+-++	15.4	26.009	22	0.2513	0.0480922
rs592423	6	139840693	14	0	C	A	-6.70039	0.00847416	PLEK2	3569257	-10.639	0.0495337	a	c	0.4812	0.0444	0.3593	0.5326	0.0098	0.0036	0.00649	++++++--++-+++-++--+-++	15.4	26.009	22	0.2513	0.0480922
rs6765484	3	50041313	22	0	C	T	19.7416	0.069068	RAB36	3939154	-83.016	8.7074e-72	t	c	0.5266	0.037	0.4551	0.578	-0.0123	0.0035	0.0004792	--++---------------++--	11.2	24.775	22	0.3079	0.0116149
rs6771546	3	49968572	22	0	C	T	19.654	0.0684982	RAB36	3939154	-82.3162	1.5071e-71	t	c	0.5076	0.028	0.4514	0.5583	-0.0095	0.0035	0.006666	--++--------------+++--	16.2	26.261	22	0.2406	0.0488099
rs6772095	3	49978069	22	0	T	C	19.6537	0.0684961	RAB36	3939154	-82.3137	1.5071e-71	t	c	0.4854	0.0298	0.4417	0.5481	0.0108	0.0035	0.002005	++--+++++++++++++++--++	8.1	23.942	22	0.3503	0.0232037
rs6792892	3	49995518	22	0	C	T	19.6642	0.0685642	RAB36	3939154	-82.3973	1.34909e-71	t	c	0.5145	0.0299	0.4519	0.5583	-0.0108	0.0035	0.002007	--++---------------++--	8.3	23.99	22	0.3477	0.0232037
rs6802890	3	49832261	22	0	G	A	14.6706	0.0393596	RAB36	3939154	-47.0618	6.04825e-37	a	g	0.564	0.0672	0.4847	0.6469	-0.0142	0.0036	6.633e-05	---+------+---+----+--+	0	17.454	22	0.7378	0.00337951
rs695238	3	49869158	22	0	C	A	14.6119	0.0390577	RAB36	3939154	-46.7016	1.35043e-36	a	c	0.5685	0.0644	0.485	0.6474	-0.0139	0.0036	0.0001027	---+-----?+---+-+--+--+	0	17.97	21	0.6509	0.00356207
rs7372730	3	49790682	22	0	C	G	14.4832	0.0383988	RAB36	3939154	-45.9162	7.27207e-36	c	g	0.4322	0.0649	0.3531	0.5152	0.0141	0.0036	7.614e-05	+++-+++++?++++-++++-++-	0	17.488	21	0.6812	0.00337951
rs7428430	3	50174184	22	0	C	T	18.5817	0.0616763	RAB36	3939154	-73.9703	1.64562e-63	t	c	0.5299	0.0397	0.1486	0.5789	-0.0108	0.0036	0.002717	--++-----+-----+---++-+	11.7	24.913	22	0.3013	0.0303475
rs7613603	3	49812866	22	0	T	C	7.82499	0.011522	RAB36	3939154	-14.215	2.47011e-05	t	c	0.1507	0.0356	0.091	0.1946	0.0149	0.0051	0.003647	+++-+++++--+---++++-+++	0	20.457	22	0.5545	0.0391467
rs7613875	3	49971514	22	0	A	C	19.4431	0.0671338	RAB36	3939154	-80.6424	5.38259e-70	a	c	0.506	0.0361	0.4506	0.5677	0.0115	0.0036	0.00145	++--++++++-++++-+++--++	11.5	24.851	22	0.3042	0.0232037
rs7620848	3	49828021	22	0	C	G	7.85731	0.0116162	RAB36	3939154	-14.3255	1.95626e-05	c	g	0.1507	0.0356	0.091	0.1946	0.0149	0.0051	0.003631	+++-+++++--+---++++-+++	0	20.417	22	0.557	0.0391467
rs7621026	3	49975334	22	0	G	A	19.6616	0.0685477	RAB36	3939154	-82.377	1.38404e-71	a	g	0.5146	0.0298	0.4516	0.5583	-0.0108	0.0035	0.002001	--++---------------++--	7.8	23.864	22	0.3544	0.0232037
rs7621352	3	50070763	22	0	A	C	19.7101	0.0688626	RAB36	3939154	-82.7637	9.09008e-72	a	c	0.4844	0.0318	0.4451	0.548	0.0109	0.0035	0.0018	++--+++++++++++++++--++	6.9	23.641	22	0.3663	0.0232037
rs7628058	3	50039474	22	0	A	G	19.7447	0.0690878	RAB36	3939154	-83.0404	8.7074e-72	a	g	0.4875	0.0292	0.445	0.548	0.0111	0.0035	0.001571	++--+++++++++++++++--++	7.4	23.77	22	0.3594	0.0232037
rs7634902	3	49762662	22	0	G	T	14.4406	0.038182	RAB36	3939154	-45.6577	1.25215e-35	t	g	0.5784	0.0689	0.485	0.6469	-0.015	0.0041	0.0002775	--?+??-?-?--?-?----?--?	0	12.762	13	0.4663	0.00761969
rs7637711	3	49829653	22	0	G	A	7.85538	0.0116106	RAB36	3939154	-14.3189	1.98315e-05	a	g	0.8464	0.0344	0.8029	0.9025	-0.0138	0.005	0.005546	---+-----++-++-----+---	0	21.74	22	0.4755	0.0468566
rs7642934	3	50174848	22	0	G	A	19.0489	0.0646135	RAB36	3939154	-77.5565	5.05103e-67	a	g	0.5184	0.0412	0.145	0.5661	-0.0099	0.0036	0.006119	--++-----+-----+---++-+	10.8	24.658	22	0.3137	0.047471
rs7645061	3	49868842	22	0	T	C	14.6116	0.039056	RAB36	3939154	-46.6996	1.3509e-36	t	c	0.4208	0.0684	0.3526	0.515	0.0145	0.0041	0.0004616	++?-??+?+?-+?+?+-++?++?	2.7	13.364	13	0.4201	0.0116149
rs7648987	3	49868455	22	0	G	A	14.6917	0.0394683	RAB36	3939154	-47.1914	4.56799e-37	a	g	0.5791	0.0685	0.4849	0.6474	-0.0145	0.0041	0.0004413	--?+??-?-?+-?-?-+--?--?	2.4	13.321	13	0.4233	0.0116149
rs7649348	3	49772375	22	0	G	A	14.4209	0.0380817	RAB36	3939154	-45.5382	1.61406e-35	a	g	0.5675	0.0651	0.4849	0.6469	-0.014	0.0036	8.718e-05	---+-----?----+----+--+	0	17.891	21	0.6559	0.00337951
rs9814664	3	50078541	22	0	C	T	19.7257	0.068964	RAB36	3939154	-82.8883	8.7074e-72	t	c	0.5122	0.0289	0.452	0.5549	-0.011	0.0035	0.001753	--++---------------++--	6.6	23.545	22	0.3715	0.0232037
rs9815766	3	49783103	22	0	C	T	14.4685	0.0383236	RAB36	3939154	-45.8265	8.58159e-36	t	c	0.5678	0.0649	0.4848	0.6469	-0.0141	0.0036	7.743e-05	---+-----?----+----+--+	0	17.53	21	0.6785	0.00337951
rs9821675	3	49902544	22	0	G	A	18.4874	0.0610898	RAB36	3939154	-73.2555	8.37051e-63	a	g	0.5508	0.05	0.4729	0.6199	-0.0118	0.0036	0.0009905	--++-----?+----+---++--	0	18.161	21	0.6388	0.0203981
rs9824435	3	49674343	22	0	C	T	7.94968	0.0118877	RAB36	3939154	-14.6437	1.00372e-05	t	c	0.8463	0.0344	0.8041	0.9025	-0.0143	0.005	0.004319	---+----+-+-++-----+---	0	21.167	22	0.5104	0.0412496
rs9830730	3	49675875	22	0	G	C	7.94103	0.0118622	RAB36	3939154	-14.6138	1.06455e-05	c	g	0.8463	0.0344	0.8041	0.9025	-0.0145	0.005	0.00381	---+----+-+-++-----+---	0	21.419	22	0.495	0.0396199
rs9835157	3	49797769	22	0	A	G	7.9094	0.011769	RAB36	3939154	-14.5045	1.3341e-05	a	g	0.1535	0.0343	0.0975	0.1963	0.0136	0.005	0.006416	+++-+++++--+--+++++-+++	0	21.767	22	0.4738	0.0480922
rs9844930	3	56953174	4	0	C	A	-6.77786	0.00866955	MMRN1	2735759	-10.8685	0.0307741	a	c	0.6477	0	0.6477	0.6477	0.0216	0.0078	0.00565	??????????????????+????	0	0	0	1	0.047131
rs9855505	3	49792158	22	0	T	G	14.4858	0.0384121	RAB36	3939154	-45.9319	7.09332e-36	t	g	0.4325	0.0649	0.3531	0.5153	0.0143	0.0036	6.328e-05	+++-++++++++++-++++-++-	0	17.446	22	0.7383	0.00337951
rs9859153	3	49807085	22	0	T	G	14.5787	0.0388868	RAB36	3939154	-46.4979	2.12221e-36	t	g	0.4322	0.0649	0.3531	0.5153	0.0142	0.0036	7.365e-05	+++-+++++?++++-++++-++-	0	17.405	21	0.6863	0.00337951
rs9861216	3	50059339	22	0	T	C	19.7295	0.0689889	RAB36	3939154	-82.9188	8.7074e-72	t	c	0.4877	0.0291	0.4451	0.548	0.011	0.0035	0.001676	++--+++++++++++++++--++	7	23.666	22	0.365	0.0232037
rs9866695	3	50069452	22	0	G	T	19.7478	0.0691085	RAB36	3939154	-83.0657	8.7074e-72	t	g	0.5124	0.029	0.452	0.5549	-0.011	0.0035	0.00171	--++---------------++--	6.7	23.588	22	0.3692	0.0232037
rs9870755	3	49809841	22	0	T	C	7.85821	0.0116189	RAB36	3939154	-14.3286	1.9434e-05	t	c	0.1508	0.0356	0.091	0.1946	0.0149	0.0051	0.003683	+++-+++++--+---++++-+++	0	20.384	22	0.559	0.0391467
rs9870858	3	49769071	22	0	C	T	7.75907	0.0113309	RAB36	3939154	-13.991	3.9983e-05	t	c	0.8464	0.0344	0.8038	0.9025	-0.0137	0.005	0.006117	---+-----++-++-----+---	0	21.752	22	0.4748	0.047471
rs9872864	3	49792023	22	0	A	G	14.5425	0.0387014	RAB36	3939154	-46.2769	3.47174e-36	a	g	0.4322	0.0649	0.3531	0.5153	0.0141	0.0036	7.557e-05	+++-+++++?++++-++++-++-	0	17.442	21	0.684	0.00337951
rs9876508	3	49780844	22	0	G	A	14.4237	0.0380959	RAB36	3939154	-45.5551	1.55787e-35	a	g	0.5677	0.065	0.4848	0.6469	-0.0141	0.0036	7.764e-05	---+-----?----+----+--+	0	17.561	21	0.6766	0.00337951
rs9883000	3	49667691	22	0	T	C	7.93752	0.0118518	RAB36	3939154	-14.6016	1.09006e-05	t	c	0.1535	0.0348	0.091	0.1959	0.0142	0.005	0.004441	+++-++++-+-+--+++++-+++	0	21.725	22	0.4764	0.0418088
